# Supplementary material for: Economics of primary healthcare: cost estimation of clinical services at primary care facilities in the six countries of the Gulf Cooperation Council
Source: PubMed Central journal article supplement — BMJ Open. 2024 Jun 8;14(6):e079332. doi: 10.1136/bmjopen-2023-079332 (PMC11163647; doi:10.1136/bmjopen-2023-079332), 2024-06-08
Supplement: bmjopen-2023-079332.draft_revisions.pdf [file bmjopen-2023-079332.draft_revisions.pdf]

# BMJ Open

BMJ Open is committed to open peer review. As part of this commitment we make the peer review history of every article we publish publicly available.

When an article is published we post the peer reviewers' comments and the authors' responses online. We also post the versions of the paper that were used during peer review. These are the versions that the peer review comments apply to.

The versions of the paper that follow are the versions that were submitted during the peer review process. They are not the versions of record or the final published versions. They should not be cited or distributed as the published version of this manuscript.

BMJ Open is an open access journal and the full, final, typeset and author-corrected version of record of the manuscript is available on our site with no access controls, subscription charges or pay-per-view fees (<http://bmjopen.bmj.com>).

If you have any questions on BMJ Open's open peer review process please email [info.bmjopen@bmj.com](mailto:info.bmjopen@bmj.com)

# BMJ Open

## Economics of Primary Healthcare: Cost Estimation of Clinical Services at Primary Care Facilities in The Six Countries of The Gulf Cooperation Council.

|                               |                                                                                                                                                                                                                                                                                                                                                                                                                                                                                                                                                                                                                                                                                                                                                                                                                                                                                                                                                                                                                                                                                                                                                                                                                                                                                                                                                                                                                                                                                              |
|-------------------------------|----------------------------------------------------------------------------------------------------------------------------------------------------------------------------------------------------------------------------------------------------------------------------------------------------------------------------------------------------------------------------------------------------------------------------------------------------------------------------------------------------------------------------------------------------------------------------------------------------------------------------------------------------------------------------------------------------------------------------------------------------------------------------------------------------------------------------------------------------------------------------------------------------------------------------------------------------------------------------------------------------------------------------------------------------------------------------------------------------------------------------------------------------------------------------------------------------------------------------------------------------------------------------------------------------------------------------------------------------------------------------------------------------------------------------------------------------------------------------------------------|
| Journal:                      | <i>BMJ Open</i>                                                                                                                                                                                                                                                                                                                                                                                                                                                                                                                                                                                                                                                                                                                                                                                                                                                                                                                                                                                                                                                                                                                                                                                                                                                                                                                                                                                                                                                                              |
| Manuscript ID                 | bmjopen-2023-079332                                                                                                                                                                                                                                                                                                                                                                                                                                                                                                                                                                                                                                                                                                                                                                                                                                                                                                                                                                                                                                                                                                                                                                                                                                                                                                                                                                                                                                                                          |
| Article Type:                 | Original research                                                                                                                                                                                                                                                                                                                                                                                                                                                                                                                                                                                                                                                                                                                                                                                                                                                                                                                                                                                                                                                                                                                                                                                                                                                                                                                                                                                                                                                                            |
| Date Submitted by the Author: | 29-Aug-2023                                                                                                                                                                                                                                                                                                                                                                                                                                                                                                                                                                                                                                                                                                                                                                                                                                                                                                                                                                                                                                                                                                                                                                                                                                                                                                                                                                                                                                                                                  |
| Complete List of Authors:     | <p>Elmusharaf, Khalifa; University of Birmingham Dubai, Public Health Poix, Sébastien; University of Limerick, School of Medicine Grafton, Daniel; United Nations Development Programme, Health and Development<br/> Jung, Johanna; United Nations Development Programme, Health and Development<br/> Gribble, Rebecca; United Nations Development Programme, Health and Development<br/> Stanton, Rachael; United Nations Development Programme, Health and Development<br/> Mahmoud, Lamia; World Health Organisation Regional Office for the Eastern Mediterranean<br/> Al Asfoor, Deena; World Health Organisation Regional Office for the Eastern Mediterranean<br/> Alawadi, Tayba; United Arab Emirates Ministry of Health &amp; Prevention<br/> Mustafa, Mohammed; United Arab Emirates Ministry of Health &amp; Prevention<br/> Showaiter, Lulwa; Kingdom of Bahrain Ministry of Health<br/> Alsuwaidan, Mohammed S.; Saudi Arabia Ministry of Health<br/> Al-Abri, Zahir; Government of Oman Ministry of Health<br/> Al-Sabahi, Sultana; Government of Oman Ministry of Health<br/> Fadda, Sherif; Primary Health Care Corporation<br/> Syed, Hassan Raza; Primary Health Care Corporation<br/> Almutairi, Muneera; Kuwait Ministry of Health<br/> Al-Farsi, Yahya; Sultan Qaboos University, College of Medicine &amp; Health Sciences<br/> Banatvala, Nicholas; World Health Organization<br/> Tarlton, Dudley; United Nations Development Programme, Health and Development</p> |
| Keywords:                     | HEALTH ECONOMICS, PUBLIC HEALTH, Primary Health Care, Health policy < HEALTH SERVICES ADMINISTRATION & MANAGEMENT                                                                                                                                                                                                                                                                                                                                                                                                                                                                                                                                                                                                                                                                                                                                                                                                                                                                                                                                                                                                                                                                                                                                                                                                                                                                                                                                                                            |
|                               |                                                                                                                                                                                                                                                                                                                                                                                                                                                                                                                                                                                                                                                                                                                                                                                                                                                                                                                                                                                                                                                                                                                                                                                                                                                                                                                                                                                                                                                                                              |

SCHOLARONE™  
Manuscripts

1  
2  
3  
4  
5  
6  
7  
8  
9  
10  
11  
12  
13  
14  
15  
16  
17  
18  
19  
20  
21  
22  
23  
24  
25  
26  
27  
28  
29  
30  
31  
32  
33  
34  
35  
36  
37  
38  
39  
40  
41  
42  
43  
44  
45  
46  
47  
48  
49  
50  
51  
52  
53  
54  
55  
56  
57  
58  
59  
60

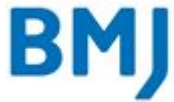

I, the Submitting Author has the right to grant and does grant on behalf of all authors of the Work (as defined in the below author licence), an exclusive licence and/or a non-exclusive licence for contributions from authors who are: i) UK Crown employees; ii) where BMJ has agreed a CC-BY licence shall apply, and/or iii) in accordance with the terms applicable for US Federal Government officers or employees acting as part of their official duties; on a worldwide, perpetual, irrevocable, royalty-free basis to BMJ Publishing Group Ltd ("BMJ") its licensees and where the relevant Journal is co-owned by BMJ to the co-owners of the Journal, to publish the Work in this journal and any other BMJ products and to exploit all rights, as set out in our [licence](#).

The Submitting Author accepts and understands that any supply made under these terms is made by BMJ to the Submitting Author unless you are acting as an employee on behalf of your employer or a postgraduate student of an affiliated institution which is paying any applicable article publishing charge ("APC") for Open Access articles. Where the Submitting Author wishes to make the Work available on an Open Access basis (and intends to pay the relevant APC), the terms of reuse of such Open Access shall be governed by a Creative Commons licence – details of these licences and which [Creative Commons](#) licence will apply to this Work are set out in our licence referred to above.

Other than as permitted in any relevant BMJ Author's Self Archiving Policies, I confirm this Work has not been accepted for publication elsewhere, is not being considered for publication elsewhere and does not duplicate material already published. I confirm all authors consent to publication of this Work and authorise the granting of this licence.

## Economics of Primary Healthcare: Cost Estimation of Clinical Services at Primary Care Facilities in The Six Countries of The Gulf Cooperation Council.

Khalifa Elmusharaf, Sébastien Poix, Daniel Grafton, Johanna Jung, Rebecca Gribble, Rachael Stanton, Lamia Mahmoud, Deena Alasfoor, Tayba Alawadi, Mohammed Mustafa, Luluah Shuwaiter, Mohamed Alsuwaidan, Zahir Al-Abri, Sultana Al-Sabahi, Sherif Fiddah, Hassan Raza Syed, Muneera Almutairi, Yahya Al-Farsi, Nicholas Banatvala, Dudley Tarlton

### Authors

|     |                     |                                                                         |                               |
|-----|---------------------|-------------------------------------------------------------------------|-------------------------------|
| 1.  | Khalifa Elmusharaf  | University of Birmingham Dubai                                          | k.elmusharaf@outlook.com      |
| 2.  | Sébastien Poix      | University of Limerick                                                  | sebastien.poix@ul.ie          |
| 3.  | Daniel Grafton      | United Nations Development Programme                                    | daniel.grafton@undp.org       |
| 4.  | Johanna S Jung      | United Nations Development Programme                                    | johanna.jung@undp.org         |
| 5.  | Rebecca Gribble     | United Nations Development Programme                                    | rebecca.gribble@undp.org      |
| 6.  | Rachael Stanton     | United Nations Development Programme                                    | rachael.stanton@undp.org      |
| 7.  | Lamia Mahmoud       | World Health Organisation Regional Office for the Eastern Mediterranean | mahmoudl@who.int              |
| 8.  | Deena Alasfoor      | World Health Organisation Regional Office for the Eastern Mediterranean | alasfoord@who.int             |
| 9.  | Tayba Alawadi       | United Arab Emirates Ministry of Health & Prevention                    | Tayba.Alawadi@mohap.gov.ae    |
| 10. | Mohammed Mustafa    | United Arab Emirates Ministry of Health & Prevention                    | mohammed.mustafa@mohap.gov.ae |
| 11. | Lulwa Showaiter     | Kingdom of Bahrain Ministry of Health                                   | lshowaiter@health.gov.bh      |
| 12. | Mohammed Alsuwaidan | Saudi Arabia Ministry of Health                                         | malsuwaidan@moh.gov.sa        |
| 13. | Zahir Al-Abri       | Government of Oman Ministry of Health                                   | zaherabri50@hotmail.com       |
| 14. | Sultana Al-Sabahi   | Government of Oman Ministry of Health                                   | al-sabahis@hotmail.com        |
| 15. | Sherif Fadda        | Primary Health Care Corporation, Qatar                                  | sfadda@phcc.gov.qa            |
| 16. | Hassan Raza Syed    | Primary Health Care Corporation, Qatar                                  | hsyed@phcc.gov.qa             |
| 17. | Muneera Almutairi   | Ministry of Health, Kuwait                                              | dr_mmmj@hotmail.com           |
| 18. | Yahya M. Al-Farsi   | Sultan Qaboos University                                                | yfmfarsi@squ.edu.om           |
| 19. | Nicholas Banatvala  | World Health Organisation                                               | banatvalan@who.int            |
| 20. | Dudley Tarlton      | United Nations Development Programme                                    | dudley.tarlton@undp.org       |

## ABSTRACT

**Background:** While the Gulf Cooperation Council (GCC) countries have demonstrated a strong commitment to strengthening primary healthcare (PHC), the costs of delivering these services in this region remain relatively unexplored. Understanding the costs of PHC delivery is essential for effective resource allocation and health system efficiency.

**Methods:** We used an ingredient-based method to estimate the cost of delivering a selection of services at PHC facilities in the six GCC countries in 2019. Services were categorized into eight programmes: immunisation; non-communicable diseases (NCDs); oral and dental care; child health; nutrition; mental health; reproductive, maternal, neonatal, and child health; and general practice. The cost estimation focused on two key ingredients: the costs of drugs and supplies, and the healthcare workforce cost. The coverage rates of specific types of health services, including screening and mental health services, were also estimated. Data for the analysis was obtained from ministries of health, health statistics reports, online databases, national surveys, and scientific literature.

**Results:** The estimated costs of delivering the selected services for the eight programmes at public PHC facilities in the six GCC countries amounted to US\$5.7 billion in 2019. The two programmes that accounted for the highest costs were general practice and NCDs, constituting 76% of the total costs modelled, while the programme with the lowest costs was mental health. Over 8 million individuals did not receive NCD screening services, and over 30 million did not receive needed mental health services in public PHC facilities across the region.

**Conclusion:** To our knowledge, this is the first study to estimate the costs of services delivered at PHC facilities in the GCC countries. Identifying the main cost drivers and the services which individuals did not receive can be used to help strengthen PHC to improve efficiency and scale up needed services for better health outcomes.

**Keywords:** health economics, health services research, health systems

1  
2  
3 **SUMMARY BOX**  
4  
5

6  
7  
8  
9  
10  
11  
12  
13  
14  
15  
16  
17  
18  
19  
20  
21  
22  
23  
24  
25  
26  
27  
28  
29  
30  
31  
32  
33  
34  
35  
36  
37  
38  
39  
40  
41  
42  
43  
44  
45  
46  
47  
48  
49  
50  
51  
52  
53  
54  
55  
56  
57  
58  
59  
60

|                                                                        |                                                                                                                                                                                                                                                                                                                                                                                                                                                                          |
|------------------------------------------------------------------------|--------------------------------------------------------------------------------------------------------------------------------------------------------------------------------------------------------------------------------------------------------------------------------------------------------------------------------------------------------------------------------------------------------------------------------------------------------------------------|
| <p><b>What is already known on this topic</b></p>                      | <ol style="list-style-type: none"> <li>1. Primary care's focus on preventive measures and early interventions leads to reduced disease burden, enhancing overall population health, productivity and lowering healthcare costs.</li> <li>2. The epidemiological shift towards NCDs is driving the transformation of PHC delivery.</li> <li>3. GCC countries display a strong commitment to PHC development, but economic evidence remains relatively limited.</li> </ol> |
| <p><b>What this study adds</b></p>                                     | <ol style="list-style-type: none"> <li>1. Delivering a selection of essential services at public PHC facilities cost US\$5.7 billion in 2019 to the six GCC countries in 2019.</li> <li>2. General practice and NCDs stood out as the primary cost driver, constituting 76% of the total costs estimated.</li> <li>3. The utilization of mental health and NCD screening services in PHC in the region is limited.</li> </ol>                                            |
| <p><b>How this study might affect research, practice or policy</b></p> | <ol style="list-style-type: none"> <li>1. These results support the effective allocation of resources for PHC in GCC based on population health needs.</li> <li>2. The GCC countries have an opportunity to increase NCD screening services and mental health services in PHC to lead to better health outcomes.</li> </ol>                                                                                                                                              |

## INTRODUCTION

Primary healthcare (PHC) refers to the first point of contact for individuals seeking medical care, but it also encompasses health education, prevention, and promotion<sup>1</sup>. From an economic perspective, investing in primary care is cost-effective, as its focus on preventive measures and early interventions results in reduced disease burden, which translates into overall population health, increased productivity and lower healthcare costs<sup>1-3</sup>. For instance, early detection and management of chronic conditions, such as non-communicable diseases (NCDs), can prevent costly hospitalisations or visits to emergency departments<sup>1</sup>. Additionally, primary care providers can often provide care for a broader range of conditions than specialists, reducing the need for referrals and associated costs.

In 2018, 40 years after the Alma-Ata Declaration, the Astana Declaration renewed the global commitment to PHC and reaffirmed its importance as the foundation of healthcare systems<sup>4</sup>. The Astana Declaration called for increased investment in PHC to strengthen health systems, achieve health-related Sustainable Development Goals, and attain universal health coverage.

Global demographics are changing, with ageing populations, population growth, as well as increasing health literacy, greater access to technology, and public expectations of health services leading to increased demand for healthcare, both globally and in the Eastern Mediterranean Region<sup>5</sup>. These changes, along with an epidemiological shift from communicable towards non-communicable diseases<sup>6-11</sup>, are influencing the transformation of PHC delivery. It is estimated that 90% of all health needs can be met at the PHC level, offering countries a clear path forward in improving health outcomes and health system efficiency<sup>12</sup>.

The WHO Eastern Mediterranean Region has a long history of strengthening PHC, demonstrated by all countries in the region endorsing the Qatar Declaration on Primary Healthcare in 2008<sup>12</sup>. This commitment to strengthening primary level-based health systems is growing, with a particular focus on family practice as one of the means of achieving universal health coverage (UHC). More recently, WHO EMRO has supported its Member States in the development of PHC-oriented models of care.

Understanding the cost of PHC components can help countries identify practical financing and allocation solutions to direct investment towards areas that reduce costs, such as medical supplies and health personnel training, ultimately enhancing the continuity, efficiency, and quality of health services to meet increasing demand in the Gulf region.

This study had two aims. First, to estimate and compare the costs of delivering a selection of PHC services in the six countries of the Gulf Cooperation Council (GCC): Bahrain, Kuwait, Oman, Qatar, Saudi Arabia



1  
2  
3  
4  
5  
6  
7  
8  
9  
10  
11  
12  
13  
14  
15  
16  
17  
18  
19  
20  
21  
22  
23  
24  
25  
26  
27  
28  
29  
30  
31  
32  
33  
34  
35  
36  
37  
38  
39  
40  
41  
42  
43  
44  
45  
46  
47  
48  
49  
50  
51  
52  
53  
54  
55  
56  
57  
58  
59  
60

(KSA) and the United Arab Emirates (UAE). Second, to estimate the coverage rates of specific types of health services, including screening and mental health services.

For peer review only

## METHODS

### Scope of the study

This study estimates the cost of delivering a selection of services at PHC facilities in the public sector arranged under eight different programmes: (1) immunisation; (2) NCDs; (3) oral and dental care; (4) child health; (5) nutrition; (6) mental health; (7) reproductive, maternal, neonatal and child health; and (8) general practice. In this study, general practice included services delivered by physicians qualified to deliver primary care to individuals, their families and their communities through general practice medical training. A comprehensive list of services was extracted from the OneHealth Tool Costing Module<sup>13</sup>. The list was then reviewed, adjusted, and validated with focal persons from the respective health ministry to ensure it accurately reflected the public PHC system. As a result, the services included in this analysis slightly varies from country to country. The services included for each country can be found in the supplemental materials (Supplemented Material 1).

### Data sources

Demographic data were obtained from official population censuses or estimates<sup>14-18</sup>. Disease prevalence and incidence were obtained from annual health statistics reports<sup>19-22</sup>, national surveys, international or national databases, and local and regional literature. The number of services delivered was obtained from the focal persons from the health ministry or annual health statistics reports. When unavailable, we used proxy indicators or made assumptions based on regional and international literature. The costs of drugs and supplies and staff time requirements were extracted from the OneHealth Tool Costing Module<sup>13</sup>, except for Qatar where standard drugs and supplies costs were completed by actual costs provided by the Primary Health Care Corporation (PHCC). However, the costs estimated in this study for Qatar remain lower than those reported by PHCC finance department due to the limited number of services included and the fact that our calculations focus solely on direct service delivery costs. Healthcare providers' annual salaries were obtained from the OneHealth Tool Costing Module<sup>13</sup> or the focal persons from the health ministry. When a clinical service not included in the initial list was added by the country, we estimated the drugs and supply costs and staff time requirements using data from the WHO-CHOICE database, WHO's review of vaccine price data<sup>23</sup>, and relevant national reports or guidelines. The assumptions used in the model are presented in the supplemental materials (Supplemental Material 2 and 3).

### Cost calculation model

We used an ingredient costing method to estimate the costs of a selection of services delivered at public PHC. This method consists of estimating the cost of producing a healthcare service by breaking down the total cost into the cost of individual ingredients or components, such as labour, equipment, materials, and supplies. In this analysis, the cost of one clinical service was calculated as follows:  $TC = C_s \times N_s$ . Where  $TC$  is

1  
2  
3 the total cost,  $C_s$  is the cost per service, and  $N_s$  is the number of services delivered in one given year. The  
4 two components used in this formula are described below.  
5  
6

7 The cost per service was obtained as follows:  $C_s = DSc + Lc$ . Where  $DSc$  is the drugs and supply costs, and  $Lc$   
8 is the labour cost. The labour cost was calculated by multiplying the number of minutes spent by each  
9 healthcare worker involved in delivering a service by their salary per minute. We estimated the salary per  
10 minute using staff time requirements from the OneHealth Tool Costing Module, as well as annual salaries  
11 and working time assumptions (working days per year, working hours per day) validated by the focal  
12 persons in each country. Using this approach, we only monetised the fraction of time directly employed on  
13 delivering the services. Therefore, we did not consider the time spent by the healthcare providers on non-  
14 clinical activities, such as training or coordination. Moreover, we accounted for overhead costs such as  
15 training, programme management, supervision, monitoring and evaluation, communication, infrastructure  
16 and equipment, transportation, and advocacy. Since there was no available information about the  
17 overhead costs necessary for running the selected services, an estimate equivalent to 20% of the total costs  
18 was agreed upon in consultation with the focal persons from the health ministry.  
19  
20  
21  
22  
23  
24  
25  
26  
27

28 To determine the number of services delivered in a year, we primarily used data from the focal persons  
29 from the health ministry or obtained from annual health statistics reports. When the number of services  
30 delivered was unavailable, we used proxy indicators or estimates based on regional and international  
31 literature. When a coverage rate expressed in percentage was available, we estimated the corresponding  
32 number of services as follows:  $N_s = TP_s \times PIN_s \times CR_s$ . Where  $TP_s$  is the target population,  $PIN_s$  is the population  
33 in need, and  $CR_s$  is the coverage rate. The target population refers to the sub-population eligible for  
34 receiving a given service, and the population in need is the percentage of the target population who should  
35 receive a service in a year. The coverage rate refers to the percentage of the population in need who  
36 effectively received a service in the year. For example, if a population of 1,000,000 are eligible for receiving  
37 a service, that 50% of them must receive it in a year, but that the coverage rate is 70%, the number of  
38 services delivered was estimated at 350,000, calculated as follows:  $350,000 = 1,000,000 \times 0.50 \times 0.70$ .  
39  
40  
41  
42  
43  
44  
45  
46

47 Finally, when an indicator specified the number of individuals instead of the number of services delivered,  
48 we estimated the latter using treatment assumptions from the OneHealth Tool. For example, we assumed  
49 that an individual treated for an already established ischemic heart disease generated an average of six  
50 visits annually. The assumptions used in the model are presented in the supplemental materials  
51 (Supplemental Material 2 and 3).  
52  
53  
54  
55  
56

### 57 **Specific coverage rate estimation method**

58  
59  
60

1  
2  
3 In this analysis, we also estimated the coverage rates for certain programmes (NCDs, mental health),  
4 disease types (diabetes, cardiovascular diseases, respiratory diseases), and intervention types (screening  
5 services). In this case, the coverage rates were calculated by dividing the aggregated number of individuals  
6 who received a set of selected services by the corresponding population in need. The results do not reflect  
7 the actual coverage rate at the country level since we did not consider the percentage of people who may  
8 have received similar services outside public PHC.  
9  
10  
11  
12  
13  
14  
15  
16  
17  
18  
19  
20  
21  
22  
23  
24  
25  
26  
27  
28  
29  
30  
31  
32  
33  
34  
35  
36  
37  
38  
39  
40  
41  
42  
43  
44  
45  
46  
47  
48  
49  
50  
51  
52  
53  
54  
55  
56  
57  
58  
59  
60

For peer review only

## RESULTS

### Cost of the selected primary healthcare services

The costs of the selected services delivered at the public PHC level across the six countries were estimated at US\$5.7 billion in 2019. Table 1 presents the total costs for each country, as well as the cost per capita and the share of these costs in the current health expenditures (CHE) and government health expenditures (GHE). The highest cost per capita was observed in Kuwait (US\$272.16), followed by Qatar (US\$199.68). While KSA has the lowest per capita cost (US\$68.60), the country has the highest overall cost, with an estimated US\$2.3 billion in 2019.

**Table 1. Cost of the selected clinical services\***

|                                    | Bahrain | Kuwait  | Oman   | Qatar  | KSA     | UAE     |
|------------------------------------|---------|---------|--------|--------|---------|---------|
| <b>Total costs (US\$, Million)</b> | 159.7   | 1,203.0 | 298.8  | 558.9  | 2,347.4 | 1,180.3 |
| <b>Per capita cost (US\$)</b>      | 107.62  | 272.16  | 112.55 | 199.68 | 68.60   | 120.83  |
| <b>Total costs (% of CHE)</b>      | 10.3    | 16.3    | 9.6    | 12.7   | 5.2     | 6.6     |
| <b>Total costs (% of GHE)</b>      | 24.2    | 18.6    | 10.9   | 17.0   | 8.3     | 11.8    |

\* The costs presented in this table include the 20% increase for overhead costs  
CHE = Current Health Expenditure, GHE= Government Health Expenditures

### Costs distribution

Table 2 shows the distribution of the costs disaggregated by programme. The costs related to general practice were the most prominent in five of the six countries (52.7-77.0%), while in Qatar the NCDs programme made up the largest share of total costs (57.4%). In the five other countries, the share of the NCDs programmes varied from 6.9% in Bahrain to 19.8% in the UAE. The child health programme is another significant cost driver that accounts for between 4.2% (KSA) to 20.3% (Bahrain) of the total costs. Taken altogether, these three programmes represent 80.0-93.3% of the costs modelled in the six countries. The mental health programme had the lowest costs across all six countries, with between 0.0% (Bahrain, Oman) and 0.3% (UAE) of the costs modelled in the study.

**Table 2. Cost of the selected clinical services disaggregated by programme in 2019 (US\$, Million)\***

|                         | Bahrain     | Kuwait       | Oman         | Qatar        | KSA            | UAE          |
|-------------------------|-------------|--------------|--------------|--------------|----------------|--------------|
| <b>General practice</b> | <b>77.7</b> | <b>610.4</b> | <b>130.5</b> | <b>109.1</b> | <b>1,445.7</b> | <b>497.1</b> |
| % of total costs        | 60.8        | 63.4         | 54.6         | 24.4         | 77.0           | 52.7         |
| <b>NCDs</b>             | <b>8.8</b>  | <b>109.3</b> | <b>36.0</b>  | <b>256.5</b> | <b>189.8</b>   | <b>187.2</b> |

|                             |              |              |              |              |                |                |
|-----------------------------|--------------|--------------|--------------|--------------|----------------|----------------|
| % of total costs            | 6.9          | 11.4         | 15.1         | 57.4         | 10.1           | 19.8           |
| <b>Child health</b>         | <b>26.0</b>  | <b>162.0</b> | <b>44.8</b>  | <b>51.4</b>  | <b>79.1</b>    | <b>177.9</b>   |
| % of total costs            | 20.3         | 16.8         | 18.7         | 11.5         | 4.2            | 18.8           |
| <b>Immunisation</b>         | <b>3.7</b>   | <b>10.9</b>  | <b>10.1</b>  | <b>14.9</b>  | <b>75.0</b>    | <b>20.6</b>    |
| % of total costs            | 2.9          | 1.1          | 4.2          | 3.3          | 4.0            | 2.2            |
| <b>Oral and dental care</b> | <b>4.5</b>   | <b>41.3</b>  | <b>6.1</b>   | <b>5.0</b>   | <b>25.3</b>    | <b>30.2</b>    |
| % of total costs            | 3.6          | 4.3          | 2.5          | 1.1          | 1.3            | 3.2            |
| <b>Nutrition</b>            | <b>4.5</b>   | <b>16.0</b>  | <b>6.6</b>   | <b>2.2</b>   | <b>25.2</b>    | <b>3.5</b>     |
| % of total costs            | 3.5          | 1.7          | 2.8          | 0.5          | 1.3            | 0.4            |
| <b>RMCH</b>                 | <b>2.5</b>   | <b>11.8</b>  | <b>5.0</b>   | <b>7.7</b>   | <b>36.5</b>    | <b>25.1</b>    |
| % of total costs            | 1.9          | 1.2          | 2.1          | 1.7          | 1.9            | 2.7            |
| <b>Mental health</b>        | <b>0.1</b>   | <b>0.8</b>   | <b>0.0</b>   | <b>0.5</b>   | <b>1.2</b>     | <b>2.7</b>     |
| % of total costs            | <0.01        | 0.1          | 0.0          | 0.1          | 0.1            | 0.3            |
| <b>Total</b>                | <b>127.8</b> | <b>962.5</b> | <b>239.1</b> | <b>447.3</b> | <b>1,877.9</b> | <b>1,180.3</b> |

\* The costs presented in this table do not include the 20% increase for overhead costs

### Non-communicable diseases

The costs of the clinical services related to diabetes, cardiovascular diseases and chronic respiratory diseases (asthma and chronic obstructive pulmonary diseases) were estimated at US\$676 million in 2019 across all six countries. As these diseases are three of the major NCDs, we sought to understand the cost burden associated with managing and treating them. Based on the coverage rates and populations in need, we estimated that 14,911,170 individuals did not receive the services they needed at public PHC facilities in 2019.

**Table 3. Cost of clinical services provided and estimated number of patients who did not receive services needed at the public PHC level for diabetes, cardiovascular and respiratory diseases**

|                 | Cost (US\$, Million)* | % of total costs | Estimated number of patients who did not receive the services needed at the public PHC level |
|-----------------|-----------------------|------------------|----------------------------------------------------------------------------------------------|
| <b>Bahrain</b>  | 5.03                  | 3.9%             | 284,410                                                                                      |
| <b>Kuwait</b>   | 102.75                | 10.7%            | 947,920                                                                                      |
| <b>Oman**</b>   | 32.27                 | 13.5%            | 376,910                                                                                      |
| <b>Qatar***</b> | 254.44                | 56.9%            | 1,458,590                                                                                    |
| <b>KSA</b>      | 108.07                | 5.8%             | 9,950,800                                                                                    |
| <b>UAE</b>      | 173.16                | 18.3%            | 1,892,540                                                                                    |
| <b>Total</b>    | 675.72                |                  | 14,911,170                                                                                   |

\* The costs presented in this table do not include the 20% increase for overhead costs

\*\* Coverage rate was calculated considering Omani nationals only.

\*\*\* In Qatar, costing data was directly provided by the Primary Healthcare Corporation (PHCC). Services delivered by other providers, such as the Red Crescent, were not included in the study.

### NCD screening services

Table 4 shows the costs and coverage rates of seven NCD screening services (screening for risk of cardiovascular diseases and diabetes, clinical breast examination, pap smear, faecal occult blood test, and screening for diabetes complications). The total cost of these screening services across all six countries was estimated at US\$18.1 million in 2019. In all countries, these costs account for less than 1% of the total costs modelled. Based on the coverage rates and populations in need, we estimated that 30,435,980 individuals did not receive the screening services they needed at public PHC facilities in 2019.

**Table 4. Cost and coverage rate for services provided and estimated number of patients who did not receive services needed at the public PHC level for screening services**

|              | Cost (Million, US\$)* | % of total costs | Coverage rate (%) | Estimated number of patients who did not receive the services needed at the public PHC level |
|--------------|-----------------------|------------------|-------------------|----------------------------------------------------------------------------------------------|
| Bahrain      | 0.9                   | 0.7%             | 6%                | 1,058,870                                                                                    |
| Kuwait       | 1.1                   | 0.1%             | 6%                | 3,184,360                                                                                    |
| Oman**       | 0.2                   | 0.1%             | 7%                | 953,920                                                                                      |
| Qatar***     | 2.0                   | 0.5%             | 4%                | 1,445,050                                                                                    |
| KSA          | 5.8                   | 0.3%             | 5%                | 18,912,380                                                                                   |
| UAE          | 8.1                   | 0.9%             | 5%                | 4,881,400                                                                                    |
| <b>Total</b> | <b>18.1</b>           |                  |                   | <b>30,435,980</b>                                                                            |

\* The costs presented in this table do not include the 20% increase for overhead costs

\*\* Coverage rate was calculated considering Omani nationals only.

\*\*\* In Qatar, costing data was directly provided by the Primary Healthcare Corporation (PHCC). Services delivered by other providers, such as the Red Crescent, were not included in the study.

### Mental health services

The total cost of mental health services was estimated at US\$5.3 million in 2019 across all six countries (Table 5). These costs made up between 0.0% (Bahrain, Oman) and 0.3% (UAE) of the total costs modelled. Based on the coverage rates and populations in need, we estimated that 8,724,160 individuals did not receive the mental services they needed at public PHC facilities in 2019.

**Table 5. Cost and coverage rate for services provided and estimated number of patients who did not receive services needed at the public PHC level for mental health services**

|                 | Cost (Million, US\$)* | % of total costs | Coverage rate (%) | Estimated number of patients who did not receive the services needed at the public PHC level |
|-----------------|-----------------------|------------------|-------------------|----------------------------------------------------------------------------------------------|
| <b>Bahrain</b>  | 0.1                   | 0.0%             | 2%                | 206,090                                                                                      |
| <b>Kuwait</b>   | 0.8                   | 0.1%             | 8%                | 267,310                                                                                      |
| <b>Oman**</b>   | 0.0                   | 0.0%             | 0%                | 142,890                                                                                      |
| <b>Qatar***</b> | 0.5                   | 0.1%             | 2%                | 430,720                                                                                      |
| <b>KSA</b>      | 1.2                   | 0.1%             | 1%                | 6,993,490                                                                                    |
| <b>UAE</b>      | 2.7                   | 0.3%             | 4%                | 683,660                                                                                      |
| <b>Total</b>    | <b>5.3</b>            |                  |                   | 8,724,160                                                                                    |

\* The costs presented in this table do not include the 20% increase for overhead costs

\*\* Coverage rate was calculated considering Omani nationals only. Mental health services are not provided within primary care in Oman.

\*\*\* In Qatar, costing data was directly provided by the Primary Healthcare Corporation (PHCC). Services delivered by other providers, such as the Red Crescent, were not included in the study.



## DISCUSSION

This study aimed to estimate the cost of selected clinical services provided at public PHC facilities in the six countries of the GCC. The findings indicate that the cost of selected services across eight programmes (general practice, NCDs, child health, immunisation, oral and dental care, nutrition, reproductive, maternal, neonatal and child health, and mental health) exceeded US\$5.7 billion in 2019. We observed significant variations in per capita cost, with KSA having the lowest (US\$68) and Kuwait having the highest (US\$217) cost. We attribute these variations to different reasons. Firstly, each country has a unique health system, which includes varying proportions of private care delivery and different healthcare delivery organisation. Secondly, the differences in population structure may also affect the costs of these services, with, for example, larger elderly populations requiring more costly services due to the higher prevalence of age-related chronic conditions. Lastly, these variations also result from differences in what interventions are delivered at the PHC level as opposed to other healthcare system levels, as well as coverage rates. While these factors demonstrate the complexity of comparing the cost of clinical services delivered at PHC facilities, this study allowed us to identify the main cost drivers and make recommendations.

Generally, the services classified under general practice were the main drivers of the total costs in all countries, followed by services related to preventing, treating, and managing NCDs. The large share of general practice in the total costs can be explained by the many services included within this programme. Costs of services related to NCDs are likely due to the high prevalence of these diseases, particularly diabetes, cardiovascular and respiratory diseases, in the six countries. A previous study found that NCDs killed nearly 43,000 people in the Gulf countries in 2019 and generated an economic burden estimated at around US\$50 billion, equivalent to 3.3% of the GDP<sup>24</sup>. We also observed that the share of costs associated with these services is significantly higher in Qatar (57.4%) than in the five other countries, where it ranges from 6.9% to 19.8%. This factor could be attributed to Qatar being the only country where actual drugs and supplies costs were used in this analysis. Indeed, the actual unit costs provided by Qatar were significantly higher than those extracted from the OneHealth Tool, which were used for the remaining five countries. This suggests that the overall costs for these countries may have been underestimated. However, this could not be verified with the other countries.

The study estimated that approximately 15 million people did not receive necessary NCDs-associated services, and around 9 million people did not receive necessary mental health services at the public PHC level across all six countries in 2019. As the analysis only modelled the cost of services delivered at the public PHC level, individuals could have received these services in the private sector or at the secondary or tertiary level of the public sector. For example, around 67,000 mental health visits were recorded in Oman through extended healthcare centres in 2019<sup>20</sup>, but none were included in our costing model.

1  
2  
3 We estimated that, across the six countries, around 30 million people did not receive the NCD screening  
4 services they required in public PHC. This includes screening for cardiovascular diseases, cervical, breast  
5 and colorectal cancers, diabetes and diabetes complications. Additionally, we found that the coverage  
6 rates for these seven services were consistently low across the countries, ranging from an average of 4%  
7 in Qatar to 7% in Oman. While these results show relatively low access to screening services, they should  
8 be qualified by the consideration that screening and awareness-related activities are rarely directly  
9 captured in health statistics records and health surveys, making them difficult to estimate accurately.  
10  
11  
12  
13  
14  
15  
16

### 17 **Limitations**

18  
19 This study had some limitations which must be considered when interpreting the results. Firstly, the list of  
20 services included in this study did not include all PHC services. Secondly, it is important to note that services  
21 included in the general practice programme could potentially overlap with other programmes. Challenges  
22 related to clearly delineating this programme in each of the six countries introduce uncertainty regarding  
23 the distribution of the costs per programme. Thirdly, the drugs and supply costs for each clinical service  
24 were estimated using cost assumptions from the OneHealth Tool Costing Module, except for Qatar where  
25 primary data was collected. Fourthly, service coverage data was not always available, which required  
26 making assumptions based on similar interventions or available data from neighbouring countries. The  
27 coverage rates must be interpreted with caution as they only reflect the number of services delivered at  
28 the public PHC level, and some services may also be delivered at other levels of the public health system  
29 and/or in the private sector. Moreover, without detailed information on the proportion of individuals  
30 utilising private care instead of public care, it becomes challenging to fully contextualise and evaluate the  
31 coverage rates. Fifthly, the study did not have information on overhead costs such as training, programme  
32 management, supervision, monitoring and evaluation, communication, infrastructure and equipment,  
33 transportation, and advocacy, and an estimation of 20% of the total costs was agreed upon to account for  
34 this. Finally, comparisons between countries and with other published estimates of PHC spending should  
35 be made with caution due to differences in the number and nature of the clinical services included for each  
36 country, variations in the healthcare system and population structure, and different data sources used.  
37  
38  
39  
40  
41  
42  
43  
44  
45  
46  
47  
48  
49

### 50 **Recommendations**

51  
52 The significance of robust PHC in establishing effective and efficient health systems is well acknowledged  
53 by all six GCC countries. They have made commendable strides in strengthening PHC by adapting to the  
54 evolving disease burden of their populations, as evident from the allocation of substantial costs to NCD  
55 services in this study. The comprehensive costing analysis presented in this report sheds light on specific  
56 areas where further enhancements in PHC services and resource allocation across the GCC countries can  
57  
58  
59  
60

1  
2  
3 be made. To reap substantial health and economic advantages, the following recommended actions  
4  
5 deserve consideration:

- 6  
7  
8 1. **Strengthen the primary health workforce:** To address the shortage of skilled healthcare  
9 professionals in the primary care sector, the GCC countries should focus on increasing investment  
10 in training, attracting, and retaining local Family Physicians (FPs) and General Practitioners (GPs).  
11 This can be achieved through incentivising primary care training programmes, such as providing  
12 scholarships for nationals pursuing careers in primary care professions. Scaling up the primary  
13 health workforce will involve initial and ongoing training and remuneration costs, but the potential  
14 health and economic gains justify this investment.  
15  
16  
17  
18
- 19  
20 2. **Expand NCD prevention and screening services:** Investing in disease prevention and routine  
21 screening services at the public PHC level is vital for strong PHC. The GCC countries have an  
22 opportunity to scale up their screening services for NCDs in public PHC, as over 30 million people  
23 in the region did not receive the required NCD screening services in 2019. To assess coverage fully,  
24 further research into private sector service provision and primary care coverage in the GCC  
25 countries is recommended. Scale-up of PHC services should be done with a focus on accessibility,  
26 equity, and achieving universal health coverage.  
27  
28  
29  
30
- 31  
32 3. **Scale-up mental health services:** Despite progress in ensuring access to mental health services  
33 and reducing stigma, the majority of mental health services are still delivered at the secondary or  
34 tertiary level in the GCC region. Integrating mental health screening and care services into public  
35 PHC, especially in general practice, can improve accessibility and lead to better health outcomes  
36 compared to treatment at higher-level facilities. Scaling up mental health services at the PHC level  
37 aligns with a people-centered approach to PHC that addresses health and disease  
38 comprehensively.  
39  
40  
41  
42  
43  
44
- 45  
46 4. **Enhance regional collaboration and policy coherence:** The GCC countries share common  
47 challenges and opportunities in strengthening PHC. Establishing a GCC PHC Coordination  
48 Committee with regular meetings to share best practices, lessons learned, and promote legislative  
49 action will support regional collaboration. The committee should focus on NCD prevention,  
50 screening, and treatment at the PHC level, and consider establishing a database to track progress  
51 and emerging challenges in NCD-related targets and indicators. Regional strategies and action  
52 plans should be developed to further promote policy coherence and collaboration.  
53  
54  
55  
56
- 57  
58 5. **Invest in research and monitoring of PHC:** To improve the efficiency and health outcomes of PHC  
59 systems in the GCC region, there should be a focus on research and monitoring. Utilising the data  
60

1  
2  
3 and costing model generated in the study, GCC countries can identify quick wins, as well as areas  
4 and services that require more resources or could be run more efficiently. Scaling up research and  
5 monitoring into PHC will provide a stronger evidence base and enable assessment of the impact  
6 of potential changes in PHC service delivery. Additionally, defining UHC health benefits packages  
7 will facilitate modelling costs associated with the included services.  
8  
9  
10  
11

12 By implementing these recommendations, the GCC countries can strengthen their PHC systems, leading to  
13 improved health outcomes and more efficient resource allocation. These actions will contribute to building  
14 effective and robust health systems that effectively address the changing disease burden of the population.  
15  
16  
17  
18  
19  
20  
21  
22  
23  
24  
25  
26  
27  
28  
29  
30  
31  
32  
33  
34  
35  
36  
37  
38  
39  
40  
41  
42  
43  
44  
45  
46  
47  
48  
49  
50  
51  
52  
53  
54  
55  
56  
57  
58  
59  
60

## CONCLUSION

To our knowledge, this study is the first that aimed to estimate the costs of services delivered at PHC in the GCC countries. The findings indicate that general practice, child health, and NCDs, particularly diabetes, cardiovascular and respiratory diseases, were the main cost drivers. This study also shows that, in all countries, a significant number of individuals didn't receive essential services, such as screening for NCDs or mental health services, at the public PHC level. Based on these results, we recommend actions to increase the availability and accessibility of prevention and screening services, integrate mental health screening and care services into primary care, and expand research and monitoring efforts on PHC investment, both in the public and private sectors.

For peer review only

**Abbreviations**

|      |                                |
|------|--------------------------------|
| FP   | Family Physician               |
| GCC  | Gulf Cooperation Council       |
| CHE  | Current Health Expenditures    |
| GHE  | Government Health Expenditures |
| KSA  | Kingdom of Saudi Arabia        |
| PHC  | Primary Healthcare             |
| PHCC | Primary Healthcare Cooperation |
| NCD  | Non-Communicable Disease       |
| UAE  | United Arab Emirates           |
| UHC  | Universal Health Coverage      |
| WHO  | World Health Organization      |

### Acknowledgements

The authors express their sincere gratitude to the Ministries of Health in the GCC, the national teams that supported the data collection and analysis, and the stakeholders who took the time to review and improve this work. The publication also greatly benefited from the contributions of WHO and UNDP Regional Offices, Dr Elfatih Abdelraheem (UNDP), Dr Awad Mataria (WHO EMRO), Dr Hassan Salah (WHO EMRO), Dr Faraz Khalid (WHO), Dr Hicham El Berri (WHO EMRO), Dr Nasim Pourghazian (WHO EMRO), Dr Alexey Kulikov (UN Interagency Task Force on NCDs), and Dr Suleiman Aldakheel (Gulf Health Council).

### Competing Interests

The authors declare no conflict of interest.

### Funders

This study received financial support from the Gulf Health Council for the Cooperation Council States.

**Twitter:** @elmusharaf1, @DudleyTarlton, @nickbanatvala

### Contributors

KE and SP substantially contributed to the conception, methodology development and data collection; conducted the data analysis, economic modelling and interpretation of data; and drafted the manuscript. DG, JJ, and RS substantially contributed to the conception and design, literature search, data collection, interpretation of data and drafting of the manuscript. TA, MM, LS, MA, ZA, SA, SF, HRS, and MA contributed to data collection and interpretation of data and revised the article critically for important intellectual content. LM, DA, YA, NB, and DT contributed to the conception and design, provided guidance on scope and interpretation of results, and revised the article critically for important intellectual content. KE, SP and DG are responsible for the overall content as guarantors. All authors approved the version of the manuscript to be published.

### Ethics statements

Ethics approval was not required for this economic evaluation study. We used publicly accessible documents and data to conduct the economic analysis.

### Patient and Public Involvement

In this economic evaluation study patients or the public were not involved in the design, conduct, reporting, or dissemination plans of our research

## REFERENCES

1. OECD. Realising the Potential of Primary Health Care. Paris: OECD Publishing, 2020.
2. Starfield B. Is primary care essential? *Lancet* 1994;344(8930):1129-33. doi: 10.1016/s0140-6736(94)90634-3
3. Macinko J, Starfield B, Shi L. The contribution of primary care systems to health outcomes within Organization for Economic Cooperation and Development (OECD) countries, 1970-1998. *Health Serv Res* 2003;38(3):831-65. doi: 10.1111/1475-6773.00149
4. World Health Organization and United Nations Children's Fund (UNICEF). Operational framework for primary health care: transforming vision into action. Geneva, Switzerland, 2020:132.
5. Salah H. KM. Family Practice in the Eastern Mediterranean Region. Universal Health Coverage and Quality Primary Care. Florida, USA: Taylor and Francis Group 2018.
6. Elmusharaf K, Grafton D, Roberts E, et al. The Case for Investment in Prevention and Control of Non-communicable Diseases in Bahrain. Geneva: UNDP, WHO, UNIATF, GHC, 2021.
7. Elmusharaf K, Menescal B, Roberts E, et al. The Case for Investment in Prevention and Control of Non-communicable Diseases in Kuwait. Geneva: UNDP, WHO, UNIATF, GHC, 2021.
8. Elmusharaf K, Roberts E, Chestnov R, et al. The Case for Investment in Prevention and Control of Non-communicable Diseases in Oman. Geneva: UNDP, WHO, UNIATF, GHC, 2021.
9. Elmusharaf K, Stanton R, Chestnov R, et al. The Case for Investment in Prevention and Control of Non-communicable Diseases in Qatar. Geneva: UNDP, WHO, UNIATF, GHC, 2021.
10. Grafton D, Elmusharaf K, Jung J, et al. The Case for Investment in Prevention and Control of Non-communicable Diseases in the Kingdom of Saudi Arabia. Geneva: UNDP, WHO, UNIATF, GHC, 2021.
11. Elmusharaf K, Chestnov R, Jung J, et al. The Case for Investment in Prevention and Control of Non-communicable Diseases in the United Arab Emirates. Geneva: UNDP, WHO, UNIATF, GHC, 2021.
12. World Health Organization RCftEM. Progress report on strengthening primary health care based health systems, 2009.
13. Avenir Health. OneHealth Tool. Intervention Assumptions, January 2016.
14. Sultanate of Oman. National Centre for Statistics and Information. Data Portal. Population. 2022 [Available from: <https://data.gov.om/OMPOP2016/population?indicator=1000140&region=1000020-muscat&nationality=1000010-omani> accessed 24/01/2022.
15. Bahrain Information & eGovernment Authority. Open Data Portal. Census and Demographic Statistics. 2019 [Available from: <https://www.data.gov.bh/explore/?sort=modified&refine.publisher=Information+%26+eGovernment+Authority&q=census&refine.keyword=Census+2020&refine.theme=Population> accessed 24/01/2022.
16. Qatar Planning and Statistics Authority. First Section. Population and Social Statistics 2019 [Available from: <https://www.psa.gov.qa/en/statistics1/pages/topicslisting.aspx?parent=Population&child=Population> accessed 24/01/2022 2022.
17. Kuwait Public Authority for Civil Information. Population Estimates of Kuwait by Age Group, Nationality & Gender. 2019 [Available from: <http://stat.paci.gov.kw> accessed 24/01/2022 2022.
18. Saudi Arabia General Authority for Statistics. Population by Gender , Age Groups and Nationality (Saudi/Non-Saudi) 2020 [Available from: <https://www.stats.gov.sa/en/5680> accessed 24/01/2022 2022.
19. Ministry of Health of Bahrain. Health Statistics 2019, 2021.
20. Sultanate of Oman Ministry of Health. Annual Health Report 2019, 2020.
21. Ministry of Health of Kuwait. Annual Health Report 2019. Fifty Sixth Edition (LVI), 20220.
22. Ministry of Health of the Kingdom of Saudi Arabia. Statistical Yearbook 2019. Chapter IV. Health Activities 2021 [Available from: <https://www.moh.gov.sa/en/Ministry/Statistics/book/Pages/default.aspx>.
23. Europe WHOROf. Review of vaccine price data: submitted by WHO European Region Member States through the WHO/UNICEF Joint Reporting Form for 2013. Copenhagen: World Health Organization. Regional Office for Europe, 2015.
24. Elmusharaf K, Grafton D, Jung JS, et al. The case for investing in the prevention and control of non-communicable diseases in the six countries of the Gulf Cooperation Council: an economic evaluation. *BMJ Glob Health* 2022;7(6) doi: 10.1136/bmjgh-2022-008670



## Economics of Primary Healthcare: Cost Estimation of Clinical Services at Primary Care Facilities in The Six Countries of The Gulf Cooperation Council.

Khalifa Elmusharaf, Sébastien Poix, Daniel Grafton, Johanna Jung, Rebecca Gribble, Rachael Stanton, Nicholas Banatvala, Lamia Mahmoud, Deena Alasfoor, Tayba Alawadi, Mohammed Mustafa, Luluah Shuwaiter, Mohamed Alsuwaidan, Zahir Al-Abri, Sultana Al-Sabahi, Sherif Fiddah, Hassan Raza Syed, Muneera Almutairi, Yahya Al-Farsi, Dudley Tarlton

-

### Supplementary Materials

**Table S1. List of selected services by country**

| Service                                            | Bahrain | KSA | Kuwait | Oman | Qatar | UAE |
|----------------------------------------------------|---------|-----|--------|------|-------|-----|
| <b>Immunization</b>                                |         |     |        |      |       |     |
| Anti-rabies                                        |         |     | X      |      |       |     |
| BCG vaccine                                        | X       | X   | X      | X    | X     | X   |
| DPT vaccine                                        | X       |     | X      | X    | X     | X   |
| DT Adult                                           |         |     | X      |      |       |     |
| DT paediatrics                                     |         |     | X      |      |       |     |
| Heb B vaccine (paediatrics)                        |         |     | X      |      |       |     |
| Hep B vaccine                                      | X       |     |        |      | X     | X   |
| Hib vaccine                                        | X       |     |        |      | X     | X   |
| HPV vaccine                                        |         | X   |        |      |       | X   |
| Influenza vaccine                                  | X       |     | X      |      | X     | X   |
| Measles vaccine                                    | X       | X   | X      | X    | X     | X   |
| Meningococcal vaccine                              |         |     | X      |      |       |     |
| Pentavalent vaccine                                |         | X   | X      | X    |       |     |
| Pneumococcal vaccine                               | X       | X   | X      | X    | X     | X   |
| Polio vaccine                                      | X       | X   | X      | X    | X     | X   |
| Rotavirus vaccine                                  | X       |     | X      |      | X     | X   |
| Rubella vaccine                                    |         | X   |        |      |       |     |
| TT                                                 |         |     | X      |      |       |     |
| Varicella vaccine                                  | X       | X   | X      | X    | X     |     |
| <b>Non-Communicable Diseases</b>                   |         |     |        |      |       |     |
| <b>Breast Cancer</b>                               |         |     |        |      |       |     |
| Basic breast cancer awareness                      | X       | X   | X      | X    | X     | X   |
| Diagnosis after screened with clinical breast exam |         |     | X      | X    |       | X   |
| Diagnosis after screened with mammography          |         |     |        |      |       | X   |
| Diagnosis without screening for breast cancer      |         |     |        |      |       | X   |
| Diagnosis: screened with clinical breast exam      |         | X   |        |      |       |     |

|                                                                                              |                |            |               |             |              |            |
|----------------------------------------------------------------------------------------------|----------------|------------|---------------|-------------|--------------|------------|
| Diagnosis: screened with mammogram                                                           |                | X          |               |             |              |            |
| Post-treatment surveillance for breast cancer patients                                       |                | X          |               |             |              |            |
| Screening: clinical breast examination                                                       | X              | X          | X             | X           | X            | X          |
| <b>Service</b>                                                                               | <b>Bahrain</b> | <b>KSA</b> | <b>Kuwait</b> | <b>Oman</b> | <b>Qatar</b> | <b>UAE</b> |
| Screening: mammography                                                                       |                | X          |               |             |              | X          |
| <b>Cervical Cancer</b>                                                                       |                |            |               |             |              |            |
| HPV DNA + VIA                                                                                |                |            |               |             |              | X          |
| Papanicolaou test (pap smear)                                                                | X              | X          | X             | X           | X            | X          |
| Post-treatment surveillance for cervical cancer                                              |                | X          |               |             |              |            |
| Visual inspection with acetic acid (VIA)                                                     |                |            |               |             |              | X          |
| <b>Colorectal Cancer</b>                                                                     |                |            |               |             |              |            |
| Diagnosis for colorectal cancer screened with FIT                                            |                |            |               |             |              | X          |
| Diagnosis for colorectal cancer screened with FOBT                                           |                | X          |               |             |              | X          |
| Diagnosis without screening for colorectal cancer (symptom based)                            |                | X          |               |             |              | X          |
| Post-treatment surveillance for colorectal cancer                                            |                | X          |               |             |              |            |
| Screening: colonoscopy                                                                       |                | X          |               |             |              |            |
| Screening: faecal immunochemical test                                                        |                |            |               |             |              | X          |
| Screening: faecal occult blood testing                                                       | X              | X          | X             | X           | X            | X          |
| Screening: sigmoidoscopy                                                                     |                | X          |               |             |              |            |
| <b>CVD &amp; Diabetes</b>                                                                    |                |            |               |             |              |            |
| Follow-up care for those at low risk of CVD/Diabetes (absolute Risk: 10-20%)                 | X              | X          | X             | X           | X            | X          |
| Intensive glycaemic control                                                                  | X              | X          | X             | X           | X            | X          |
| Neuropathy screening and preventive foot care                                                | X              | X          | X             | X           | X            | X          |
| Referral for retinopathy screening                                                           |                |            |               | X           |              |            |
| Retinopathy screening                                                                        | X              |            | X             |             | X            | X          |
| Screening for risk of CVD/Diabetes                                                           | X              | X          | X             | X           | X            | X          |
| Standard glycaemic control                                                                   | X              | X          | X             | X           | X            | X          |
| Treatment for those with absolute risk of CVD/Diabetes 20-30%                                | X              | X          | X             | X           | X            | X          |
| Treatment for those with established cerebrovascular disease and post stroke                 | X              | X          | X             | X           | X            | X          |
| Treatment for those with high absolute risk of CVD/Diabetes (>30%)                           | X              | X          | X             | X           | X            | X          |
| Treatment for those with high blood pressure but low absolute risk of CVD/Diabetes (< 20%)   | X              | X          | X             | X           | X            | X          |
| Treatment for those with very high cholesterol but low absolute risk of CVD/Diabetes (< 20%) | X              | X          | X             | X           | X            | X          |
| Treatment of cases with established ischaemic heart disease (IHD)                            | X              | X          | X             | X           | X            | X          |
| Treatment of cases with rheumatic heart disease (with benzathine penicillin)                 | X              | X          |               |             | X            | X          |
| Treatment of new cases of acute myocardial infarction (AMI) with aspirin                     | X              | X          | X             | X           | X            | X          |
| <b>Emergency care</b>                                                                        |                |            |               |             |              |            |
| Average annual emergency care needs                                                          | X              | X          | X             | X           | X            | X          |
| <b>Oral Care</b>                                                                             |                |            |               |             |              |            |

|                                                                                 |                |            |               |             |              |            |
|---------------------------------------------------------------------------------|----------------|------------|---------------|-------------|--------------|------------|
| Dental cleaning and preventive care                                             | X              | X          | X             | X           | X            |            |
| Oral and dental care                                                            |                |            |               |             |              | X          |
| <b>Respiratory Diseases</b>                                                     |                |            |               |             |              |            |
| <b>Service</b>                                                                  | <b>Bahrain</b> | <b>KSA</b> | <b>Kuwait</b> | <b>Oman</b> | <b>Qatar</b> | <b>UAE</b> |
| Asthma: high dose inhaled beclomethasone + SABA                                 | X              |            | X             |             | X            | X          |
| Asthma: high dose inhaled fluticasone + SABA                                    |                | X          |               | X           |              |            |
| Asthma: inhaled short acting beta agonist for intermittent asthma               | X              | X          | X             | X           | X            | X          |
| Asthma: low dose inhaled beclomethasone + SABA                                  | X              |            | X             |             | X            | X          |
| Asthma: low dose inhaled fluticasone + SABA                                     |                | X          |               | X           |              |            |
| Asthma: oral prednisolone + theophylline + high dose inhaled fluticasone + SABA |                | X          |               | X           |              |            |
| Asthma: theophylline + high dose inhaled fluticasone + SABA                     |                | X          |               | X           |              |            |
| COPD: exacerbation treatment with antibiotics                                   | X              | X          | X             | X           | X            | X          |
| COPD: exacerbation treatment with oral prednisolone                             | X              | X          | X             | X           | X            | X          |
| COPD: exacerbation treatment with oxygen                                        |                | X          |               | X           |              | X          |
| COPD: inhaled salbutamol                                                        | X              | X          | X             | X           | X            | X          |
| COPD: ipratropium inhaler                                                       | X              | X          | X             | X           | X            | X          |
| COPD: low-dose oral theophylline                                                | X              | X          | X             | X           | X            |            |
| COPD: smoking cessation                                                         | X              | X          | X             | X           | X            | X          |
| <b>Child Health</b>                                                             |                |            |               |             |              |            |
| <b>Deworming</b>                                                                |                |            |               |             |              |            |
| Deworming                                                                       | X              |            | X             | X           | X            |            |
| <b>Diarrhea management</b>                                                      |                |            |               |             |              |            |
| Antibiotics for treatment of dysentery                                          |                | X          |               | X           |              | X          |
| ORS                                                                             | X              | X          | X             | X           | X            | X          |
| Treatment of severe diarrhea                                                    |                | X          |               |             |              |            |
| Zinc (diarrhea treatment)                                                       |                | X          |               | X           |              |            |
| <b>General</b>                                                                  |                |            |               |             |              |            |
| Zinc supplementation                                                            |                | X          |               | X           |              |            |
| Child general health                                                            | X              | X          | X             | X           | X            | X          |
| School health                                                                   | X              |            |               |             | X            |            |
| <b>Malaria</b>                                                                  |                |            |               |             |              |            |
| Malaria treatment (0-4, mild cases)                                             |                |            |               | X           |              |            |
| <b>Pneumonia</b>                                                                |                |            |               |             |              |            |
| Pneumonia treatment (children)                                                  | X              | X          | X             | X           | X            | X          |
| Treatment of severe pneumonia                                                   |                | X          |               |             |              |            |
| <b>Routine Child Health Care Visit</b>                                          |                |            |               |             |              |            |
| Routine child health care visit (< 1 year)                                      |                |            |               |             |              | X          |
| Routine child health care visit (1-5 years)                                     |                |            |               |             |              | X          |
| <b>School Health Program</b>                                                    |                |            |               |             |              |            |

|                                                                                               |                |            |               |             |              |            |
|-----------------------------------------------------------------------------------------------|----------------|------------|---------------|-------------|--------------|------------|
| Dental screening                                                                              |                |            |               | X           |              |            |
| Ear screening                                                                                 |                |            |               | X           |              |            |
| Eye screening                                                                                 |                |            |               | X           |              |            |
| <b>Service</b>                                                                                | <b>Bahrain</b> | <b>KSA</b> | <b>Kuwait</b> | <b>Oman</b> | <b>Qatar</b> | <b>UAE</b> |
| <b>Nutrition</b>                                                                              |                |            |               |             |              |            |
| <b>Adults</b>                                                                                 |                |            |               |             |              |            |
| Care for adults with food allergies and sensitivities                                         |                |            |               |             |              | X          |
| Care for adults with hyperuricemia                                                            |                |            |               |             |              | X          |
| Care for adults with kidney diseases                                                          |                |            |               |             |              | X          |
| Care for adults with low BMI                                                                  | X              | X          | X             | X           | X            |            |
| Care for adults with nutritional anaemia                                                      |                |            |               |             |              | X          |
| <b>Care for adults with other nutritional diseases</b>                                        |                |            |               |             |              |            |
| Care for diabetic adults                                                                      |                |            |               |             |              | X          |
| Care for obese adults                                                                         |                |            |               |             |              | X          |
| <b>All populations</b>                                                                        |                |            |               |             |              |            |
| Food fortification                                                                            |                |            |               |             |              | X          |
| <b>Children</b>                                                                               |                |            |               |             |              |            |
| Breastfeeding counselling and support                                                         | X              | X          | X             | X           | X            |            |
| Complementary feeding counselling and support                                                 | X              | X          | X             | X           |              |            |
| <b>Feeding counselling and support for infants and young children in emergency situations</b> |                |            |               |             |              |            |
| Intermittent iron supplementation in children                                                 | X              |            | X             | X           | X            |            |
| Management of food allergies or food intolerances                                             |                |            |               |             |              | X          |
| Management of moderate acute malnutrition                                                     |                |            |               |             |              | X          |
| Management of moderate acute malnutrition (children)                                          |                | X          |               | X           |              |            |
| Management of severe malnutrition                                                             |                |            |               |             |              | X          |
| <b>Pregnant and lactating women</b>                                                           |                |            |               |             |              |            |
| Calcium supplementation for prevention and treatment of pre-eclampsia and eclampsia           |                |            |               | X           |              |            |
| Daily FAF, postpartum, anaemic women                                                          |                |            |               | X           |              |            |
| Daily iron and folic acid supplementation (pregnant women)                                    | X              | X          | X             | X           | X            |            |
| Intermittent FAF, postpartum, non-anaemic pregnant women                                      |                |            |               | X           |              |            |
| Intermittent iron and folic acid supplementation (non-anaemic pregnant women)                 | X              | X          | X             | X           | X            |            |
| Iodine supplementation in pregnant women                                                      |                | X          |               |             |              |            |
| Vitamin A supplementation in pregnant women                                                   |                | X          |               |             |              |            |
| <b>Women of reproductive age and adolescent girls</b>                                         |                |            |               |             |              |            |
| Intermittent iron-folic acid supplementation                                                  | X              | X          | X             | X           | X            |            |
| <b>Mental Health</b>                                                                          |                |            |               |             |              |            |
| <b>Alcohol use/ dependence</b>                                                                |                |            |               |             |              |            |
| Identification and assessment of new cases of alcohol use/dependence                          |                |            |               | X           |              | X          |

|                                                                                                                           |                |            |               |             |              |            |
|---------------------------------------------------------------------------------------------------------------------------|----------------|------------|---------------|-------------|--------------|------------|
| Brief interventions and follow-up for alcohol use/dependence                                                              |                | X          |               | X           |              |            |
| Identification and assessment of new cases of alcohol use/dependence                                                      |                | X          |               |             |              |            |
| <b>Anxiety Disorders</b>                                                                                                  |                |            |               |             |              |            |
| <b>Service</b>                                                                                                            | <b>Bahrain</b> | <b>KSA</b> | <b>Kuwait</b> | <b>Oman</b> | <b>Qatar</b> | <b>UAE</b> |
| Basic psychological treatment for anxiety disorders (mild cases).                                                         | X              |            | X             | X           | X            | X          |
| Basic psychosocial treatment and anti-depressant medication for anxiety disorders (mild-moderate cases)                   | X              | X          | X             |             | X            | X          |
| Basic psychosocial treatment for anxiety disorders (mild cases)                                                           |                | X          |               |             |              |            |
| <b>Attention Disorders</b>                                                                                                |                |            |               |             |              |            |
| Methylphenidate medication                                                                                                |                |            |               |             |              | X          |
| <b>Bipolar Disorders</b>                                                                                                  |                |            |               |             |              |            |
| Basic psychosocial treatment, advice, and follow-up for bipolar disorder, plus mood-stabilizing medication                |                | X          |               |             |              | X          |
| <b>Conduct Disorders</b>                                                                                                  |                |            |               |             |              |            |
| Basic psychosocial treatment, advice, and follow-up for behavioural disorders                                             |                | X          |               |             |              | X          |
| <b>Dementia</b>                                                                                                           |                |            |               |             |              |            |
| Assessment, diagnosis, advice, and follow-up for dementia                                                                 |                | X          |               |             |              | X          |
| Dementia screening, basic work up and referral to tertiary care                                                           |                |            |               | X           |              |            |
| Pharmacological treatment of dementia                                                                                     |                |            |               |             |              | X          |
| <b>Depression</b>                                                                                                         |                |            |               |             |              |            |
| Basic psychosocial treatment and anti-depressant medication of first episode (mild to moderate cases)                     |                |            |               | X           |              |            |
| Basic psychosocial treatment and anti-depressant medication of first episode (moderate-severe cases)                      | X              | X          | X             |             | X            | X          |
| Basic psychosocial treatment for mild depression                                                                          | X              | X          | X             | X           | X            | X          |
| Intensive psychosocial treatment and anti-depressant medication of recurrent moderate-severe cases on a maintenance basis |                |            |               |             |              | X          |
| Psychosocial care for perinatal depression                                                                                |                |            |               |             |              | X          |
| Psychosocial care for perinatal depression for mild cases only                                                            |                |            |               | X           |              |            |
| <b>Developmental Disorders</b>                                                                                            |                |            |               |             |              |            |
| Basic psychosocial treatment, advice, and follow-up for developmental disorders                                           |                | X          |               |             |              | X          |
| <b>Drug use/dependence</b>                                                                                                |                |            |               |             |              |            |
| Brief interventions and follow-up for drug use/dependence                                                                 |                | X          |               | X           |              | X          |
| Identification and assessment of new cases of drug use/dependence                                                         |                | X          |               | X           |              |            |
| <b>Epilepsy</b>                                                                                                           |                |            |               |             |              |            |
| Basic psychosocial support, advice, and follow-up only                                                                    |                |            |               | X           |              |            |
| Basic psychosocial support, advice, and follow-up, plus anti-epileptic medication                                         |                | X          |               |             |              | X          |
| <b>Psychosis</b>                                                                                                          |                |            |               |             |              |            |
| Basic psychosocial support and anti-psychotic medication                                                                  |                | X          |               | X           |              | X          |
| <b>Self-harm/suicide</b>                                                                                                  |                |            |               |             |              |            |
| Assess and care for person with self-harm                                                                                 |                | X          |               | X           |              |            |

|                                                                           |                |            |               |             |              |            |
|---------------------------------------------------------------------------|----------------|------------|---------------|-------------|--------------|------------|
| Basic psychosocial treatment, advice, and follow-up for self-harm/suicide |                |            |               | X           |              |            |
| Pesticide intoxication management                                         |                |            |               | X           |              |            |
| <b>Maternal Newborn and Reproductive Health</b>                           |                |            |               |             |              |            |
| <b>Antenatal Care (ANC)</b>                                               |                |            |               |             |              |            |
| <b>Service</b>                                                            | <b>Bahrain</b> | <b>KSA</b> | <b>Kuwait</b> | <b>Oman</b> | <b>Qatar</b> | <b>UAE</b> |
| Antenatal Care (ANC)                                                      |                |            |               |             |              | X          |
| <b>Childbirth care - Facility births</b>                                  |                |            |               |             |              |            |
| Feeding counselling and support for low-birth-weight infants              |                |            |               | X           |              |            |
| Kangaroo mother care                                                      |                |            |               | X           |              |            |
| Labour and delivery management                                            |                |            |               | X           |              |            |
| Manual removal of placenta                                                |                |            |               | X           |              |            |
| MgSO4 for eclampsia                                                       |                |            |               | X           |              |            |
| Neonatal resuscitation                                                    |                |            |               | X           |              |            |
| Parenteral administration of uterotonics                                  |                |            |               | X           |              |            |
| Pre-referral management of labour complications                           |                | X          |               | X           |              |            |
| Treatment of local infections (newborn)                                   |                |            |               | X           |              |            |
| <b>Family planning</b>                                                    |                |            |               |             |              |            |
| Condom - male                                                             |                |            |               | X           |              |            |
| Contraception management                                                  |                |            |               |             | X            |            |
| Implant - Implanon (3 years)                                              |                |            |               | X           |              |            |
| Injectable - 3 month (depo provera)                                       | X              |            | X             | X           |              |            |
| IUCD follow-up care                                                       | X              |            | X             |             | X            |            |
| IUD - Copper-T 380-A IUD (10 years)                                       |                | X          |               | X           |              |            |
| Lactational amenorrhea method                                             |                |            |               | X           |              |            |
| Other contraceptives                                                      | X              |            | X             |             |              |            |
| Periodic abstinence                                                       |                |            |               | X           |              |            |
| Pill - progestin only                                                     | X              |            | X             | X           |              |            |
| Pill - standard daily regimen                                             |                | X          |               |             |              |            |
| Standard days method                                                      |                |            |               | X           |              |            |
| Withdrawal                                                                |                | X          |               | X           |              |            |
| Post-abortion case management                                             |                |            | X             |             | X            |            |
| <b>Management of ectopic pregnancy care</b>                               |                |            |               |             |              |            |
| Ectopic case management                                                   |                |            |               | X           |              |            |
| <b>Menopause Program</b>                                                  |                |            |               |             |              |            |
| Screen for mood disorders                                                 |                |            |               | X           |              |            |
| Screen for urogenital dryness                                             |                |            |               | X           |              |            |
| <b>Other</b>                                                              |                |            |               |             |              |            |
| Postmenopausal care                                                       |                |            | X             |             |              |            |
| Management of abnormal uterine bleeding                                   |                |            | X             |             |              |            |

|    |                                                                   |                |            |               |             |              |            |
|----|-------------------------------------------------------------------|----------------|------------|---------------|-------------|--------------|------------|
| 1  | Management of amenorrhoea                                         |                |            | X             |             |              |            |
| 2  |                                                                   |                |            |               |             |              |            |
| 3  | Management of hirsutism                                           |                |            | X             |             |              |            |
| 4  |                                                                   |                |            |               |             |              |            |
| 5  | Management of irregular cycles                                    |                |            | X             |             |              |            |
| 6  |                                                                   |                |            |               |             |              |            |
| 7  | Management of mild endometriosis                                  |                |            | X             |             |              |            |
| 8  |                                                                   |                |            |               |             |              |            |
| 9  | <b>Service</b>                                                    | <b>Bahrain</b> | <b>KSA</b> | <b>Kuwait</b> | <b>Oman</b> | <b>Qatar</b> | <b>UAE</b> |
| 10 |                                                                   |                |            |               |             |              |            |
| 11 | Management of PCO                                                 |                |            | X             |             |              |            |
| 12 | Management of pre pubertal problems (delayed menarche, infection) |                |            | X             |             |              |            |
| 13 |                                                                   |                |            |               |             |              |            |
| 14 | <b>Other sexual and reproductive health</b>                       |                |            |               |             |              |            |
| 15 | Cervical cancer screening                                         |                | X          | X             |             |              |            |
| 16 |                                                                   |                |            |               |             |              |            |
| 17 | Identification and management of infertility                      | X              | X          | X             | X           | X            |            |
| 18 | Treatment of chlamydia                                            | X              | X          | X             | X           | X            |            |
| 19 | Treatment of gonorrhoea                                           | X              | X          | X             | X           | X            |            |
| 20 | Treatment of pelvic inflammatory disease                          | X              | X          | X             | X           | X            |            |
| 21 | Treatment of syphilis                                             | X              | X          | X             | X           | X            |            |
| 22 | Treatment of trichomoniasis                                       | X              | X          | X             | X           | X            |            |
| 23 | Treatment of urinary tract infection                              | X              | X          | X             | X           | X            |            |
| 24 |                                                                   |                |            |               |             |              |            |
| 25 | <b>Postpartum Care</b>                                            |                |            |               |             |              |            |
| 26 | Breast feeding education and advice                               | X              |            | X             |             | X            |            |
| 27 | Mastitis                                                          | X              |            | X             | X           |              |            |
| 28 | Postnatal care                                                    |                |            |               |             |              | X          |
| 29 | Postpartum care examination                                       |                |            |               |             | X            |            |
| 30 | Treatment of postpartum haemorrhage                               | X              | X          | X             | X           | X            |            |
| 31 | Maternal sepsis case management                                   |                |            |               | X           |              |            |
| 32 |                                                                   |                |            |               |             |              |            |
| 33 | <b>Preconception Care (PCC)</b>                                   |                |            |               |             |              |            |
| 34 | Preconception care                                                |                |            |               |             |              | X          |
| 35 |                                                                   |                |            |               |             |              |            |
| 36 | <b>Pregnancy Care</b>                                             |                |            |               |             |              |            |
| 37 | Basic ANC                                                         | X              | X          | X             | X           | X            |            |
| 38 | Syphilis detection and treatment (pregnant women)                 | X              |            | X             |             | X            |            |
| 39 | Tetanus toxoid (pregnant women)                                   | X              | X          | X             | X           | X            |            |
| 40 | Syphilis screening (pregnant women)                               |                |            |               | X           |              |            |
| 41 |                                                                   |                |            |               |             |              |            |
| 42 | <b>Pregnancy care - Treatment of pregnancy complications</b>      |                |            |               |             |              |            |
| 43 | Deworming (pregnant women)                                        | X              |            | X             | X           |              |            |
| 44 | Hypertensive disorder case management                             |                | X          |               | X           |              |            |
| 45 | Management of other pregnancy complications                       |                |            |               | X           |              |            |
| 46 | Management of pre-eclampsia (magnesium sulphate)                  |                |            |               | X           |              |            |
| 47 |                                                                   |                |            |               |             |              |            |
| 48 | <b>Premarital screening program</b>                               |                |            |               |             |              |            |
| 49 | Premarital screening program                                      |                |            |               |             |              | X          |
| 50 |                                                                   |                |            |               |             |              |            |
| 51 | <b>General Practice</b>                                           |                |            |               |             |              |            |
| 52 | General practice                                                  | X              | X          | X             | X           | X            | X          |
| 53 |                                                                   |                |            |               |             |              |            |
| 54 |                                                                   |                |            |               |             |              |            |
| 55 |                                                                   |                |            |               |             |              |            |
| 56 |                                                                   |                |            |               |             |              |            |
| 57 |                                                                   |                |            |               |             |              |            |
| 58 |                                                                   |                |            |               |             |              |            |
| 59 |                                                                   |                |            |               |             |              |            |
| 60 |                                                                   |                |            |               |             |              |            |

**Table S2. Assumptions used to estimate the population in need, drugs and supplies costs, and labour costs (all countries)**

| Service                                                                   | Population in Need                                                                                     | Drugs and Supply Costs                                   | Labour Costs                                      |
|---------------------------------------------------------------------------|--------------------------------------------------------------------------------------------------------|----------------------------------------------------------|---------------------------------------------------|
| Varicella vaccine                                                         | Children 1 and 5 years old, for the first and the second dose                                          | USD 17.5 for one dose (WHO Review of vaccine price data) | Nurse (4 min) and GP (4 min) for one dose         |
| Influenza vaccine                                                         | Children 0-5 + Pregnant women + People 65+                                                             | USD 2.39 for one dose (WHO Review of vaccine price data) | Nurse (4 min) and GP (4 min) for one dose         |
| Retinopathy screening                                                     | People with diabetes should be screened every year (100%)                                              | -                                                        | -                                                 |
| Neuropathy screening                                                      | People with diabetes should be screened every year (100%)                                              | -                                                        | -                                                 |
| Clinical breast examination                                               | Women aged 40-70 should be screened every 2 years (50%)                                                | -                                                        | -                                                 |
| Diagnosis after screened with clinical breast examination                 | Based on country breast cancer incidence rate (WHO – IARC 2020)                                        | -                                                        | -                                                 |
| Pap smear                                                                 | Women 30-49 should be screened every 3 years (33%)                                                     | -                                                        | -                                                 |
| Faecal occult blood screening                                             | People 50+ should be screened every 10 years (10%)                                                     | -                                                        | -                                                 |
| Dental cleaning and preventive care                                       | All population                                                                                         | No costs estimated                                       | Nurse (20 min) and Dentist (15 min) for one visit |
| General child health                                                      | Children 0-14                                                                                          | Cost per outpatient visit (WHO-CHOICE) – Labour costs    | GP (15 min) for one visit                         |
| Pneumonia treatment                                                       | -                                                                                                      | -                                                        | Nurse (20 min) + GP (20 min) for one visit        |
| Daily iron and folic acid supplementation (anaemic pregnant women)        | 100% of anaemic pregnant women (World Bank)                                                            | -                                                        | -                                                 |
| Intermittent iron folic acid supplementation (non-anaemic pregnant women) | 100% of non-anaemic pregnant women (World Bank)                                                        | -                                                        | -                                                 |
| Daily FAF, postpartum, non-anaemic women                                  | Based on number of live births (Annual Health Statistics) and percentage of anaemic women (World Bank) |                                                          |                                                   |



|                                              |                                                                                                                                                          |                                                       |                                                       |
|----------------------------------------------|----------------------------------------------------------------------------------------------------------------------------------------------------------|-------------------------------------------------------|-------------------------------------------------------|
| Intermittent FAF, postpartum, anaemic women  | Based on number of live births (Annual Health Statistics) and percentage of non-anaemic women (World Bank)                                               |                                                       |                                                       |
| Care for adults with low BMI                 | 100% of underweight adults (Global Nutrition Report)                                                                                                     | -                                                     | -                                                     |
| All mental health clinical services          | Based on prevalence rates (Zuberi et al. 2021, GBD 2016 Epilepsy Collaborators, GBD 2016 Dementia Collaborators, WHO-EMRO, Atlas of Substance Disorder). | -                                                     | -                                                     |
| Treatment of postpartum haemorrhage (PPH)    | Based on incidence rates of PPH                                                                                                                          | -                                                     | -                                                     |
| Identification and management of infertility | Based on regional prevalence (Eldib 2018) among adults 15-49 (3.8%)                                                                                      | -                                                     | -                                                     |
| Treatment of syphilis                        | Based on regional incidence rates (Kenyon et al. 2014) among adults 15-49 (2.2%)                                                                         | -                                                     | -                                                     |
| Treatment of gonorrhoea                      | Based on regional incidence rates (Kenyon et al. 2014) among adults 15-49 (0.9%)                                                                         | -                                                     | -                                                     |
| Treatment of chlamydia                       | Based on regional incidence rates (Kenyon et al. 2014) among adults 15-49 (1.9%)                                                                         | -                                                     | -                                                     |
| Treatment of trichomoniasis                  | Based on regional incidence rates (Kenyon et al. 2014) among adults 15-49 (2.8%)                                                                         | -                                                     | -                                                     |
| Treatment of pelvic inflammatory infection   | Based on US incidence rate (Kresiel 2021) among adults 15-49 (3.6%)                                                                                      | -                                                     | -                                                     |
| General practice                             | All population                                                                                                                                           | Cost per outpatient visit (WHO-CHOICE) – Labour costs | GP (15 min) for one visit                             |
| All Services                                 | -                                                                                                                                                        | -                                                     | Community health workers time was allocated to nurses |

**Table S2-A. Country-specific assumptions (Oman)**

| Service                                  | Population in Need               | Drugs and Supply Costs | Labour Costs                 |
|------------------------------------------|----------------------------------|------------------------|------------------------------|
| School health program (eye screening)    | Children in grade 1, 4, 7 and 10 | No costs estimated     | Nurse (10 min) for one visit |
| School health program (dental screening) | Children in grade 1              | No costs estimated     | Nurse (10 min) for one visit |

|                                                                             |                           |                    |                              |
|-----------------------------------------------------------------------------|---------------------------|--------------------|------------------------------|
| School health program ( ear screening)                                      | Children in grade 1 and 2 | No costs estimated | Nurse (10 min) for one visit |
| Menopause program: screen for urogenital dryness, screen for mood disorders | Women 45-55 (100%)        | No costs estimated | GP (15 min) for one visit    |
| Elderly and community care program                                          | People 60+                | No costs estimated | Nurse (45 min) for one visit |

**Table S2-B. Country-specific assumptions (Bahrain)**

| Service       | Population in Need | Drugs and Supply Costs | Labour Costs                 |
|---------------|--------------------|------------------------|------------------------------|
| School health | Children 5-19      | No costs estimated     | Nurse (10 min) for one visit |

**Table S2-C. Country-specific assumptions (Kuwait)**

| Service                                                                                                                                      | Population in Need                                                            | Drugs and Supply Costs                      | Labour Costs                              |
|----------------------------------------------------------------------------------------------------------------------------------------------|-------------------------------------------------------------------------------|---------------------------------------------|-------------------------------------------|
| Meningococcal vaccine                                                                                                                        | PIN was not estimated since the number of visits was directly provided by MOH | USD 10.6 (WHO Review of vaccine price data) | Nurse (4 min) and GP (4 min) for one dose |
| DT adult vaccine                                                                                                                             | PIN was not estimated since the number of visits was directly provided by MOH | USD 1.8 (WHO Review of vaccine price data)  | Nurse (4 min) and GP (4 min) for one dose |
| DT pediatrics vaccine                                                                                                                        | PIN was not estimated since the number of visits was directly provided by MOH | USD 1.8 (WHO Review of vaccine price data)  | Nurse (4 min) and GP (4 min) for one dose |
| Anti-rabies vaccine                                                                                                                          | PIN was not estimated since the number of visits was directly provided by MOH | USD 48.6 (WHO Review of vaccine price data) | Nurse (4 min) and GP (4 min) for one dose |
| Hep B vaccine (paediatrics)                                                                                                                  | PIN was not estimated since the number of visits was directly provided by MOH | USD 3.24 (WHO Review of vaccine price data) | Nurse (4 min) and GP (4 min) for one dose |
| TT vaccine                                                                                                                                   | PIN was not estimated since the number of visits was directly provided by MOH | USD 0.58 (WHO Review of vaccine price data) | Nurse (4 min) and GP (4 min) for one dose |
| Management of pre-pubertal problems                                                                                                          | PIN was not estimated since the number of visits was directly provided by MOH | No costs estimated                          | Obs/Gyn (15 min) for one visit            |
| Management of PCO, hirsutism, irregular cycles, amenorrhea, abnormal uterine bleeding, management of mild endometriosis, postmenopausal care | PIN was not estimated since the number of visits was directly provided by MOH | No costs estimated                          | Obs/Gyn (15 min) for one visit            |

**Table S2-D. Country-specific assumptions (Qatar)**

| Service                     | Population in Need                                                            | Drugs and Supply Costs                                | Labour Costs                                   |
|-----------------------------|-------------------------------------------------------------------------------|-------------------------------------------------------|------------------------------------------------|
| Child General Health        | Children 0-14                                                                 | Cost per outpatient visit (WHO-CHOICE) – Labour costs | GP (15 min) for one visit                      |
| School health               | PIN was not estimated since the number of visits was directly provided by MOH | No costs estimated                                    | Nurse (10 min) for one visit                   |
| Postpartum care examination | PIN was not estimated since the number of visits was directly provided by MOH | Cost per outpatient visit (WHO-CHOICE) – Labour costs | GP (10 min) and Midwife (20 min) for one visit |
| Allied health               | PIN was not estimated since the number of visits was directly provided by MOH | Cost per outpatient visit (WHO-CHOICE) – Labour costs | Nurse (20 min) for one visit                   |

**Table S2-E. Country-specific assumptions (UAE)**

| Service                                                   | Population in Need                                                  | Drugs and Supply Costs                                    | Labour Costs                |
|-----------------------------------------------------------|---------------------------------------------------------------------|-----------------------------------------------------------|-----------------------------|
| <b>Screening: mammography</b>                             | Women aged 40-70 should be screened every 2 years (50%)             | -                                                         | -                           |
| <b>Diagnosis for breast cancer</b>                        | Based on country breast cancer incidence rate (WHO – IARC 2020)     | -                                                         | -                           |
| <b>Visual inspection with acetic acid, HPV DNA + VIA.</b> | Based on country cervix cancer incidence rate (WHO – IARC 2020)     | -                                                         | -                           |
| <b>Screening; faecal immunochemical test</b>              | Based on country colorectal cancer incidence rate (WHO – IARC 2020) | -                                                         | -                           |
| <b>Diagnosis for colorectal cancer</b>                    | Based on country colorectal cancer incidence rate (WHO – IARC 2020) | -                                                         | -                           |
| <b>Routine child healthcare visit (1 year)</b>            | Children 0-12 months (100%)                                         | Estimate based on OHT drugs and supplies prices: USD 19.7 | Nurse (20 min), GP (10 min) |
| <b>Routine child healthcare visit (1-5 years)</b>         | Children 12-59 months (100%)                                        | Estimate based on OHT drugs and supplies prices: USD 2.8  | Nurse (20 min), GP (10 min) |
| <b>Nutrition: Care for obese adults</b>                   | People with obesity (Global Nutrition Report)                       | No costs estimated                                        | GP (10 min)                 |
| <b>Nutrition: Care for diabetic adults</b>                | People with diabetes (OHT)                                          | No costs estimated                                        | GP (10 min)                 |

|                                                                         |                                                                          |                                                            |                                                      |
|-------------------------------------------------------------------------|--------------------------------------------------------------------------|------------------------------------------------------------|------------------------------------------------------|
| <b>Nutrition: Care for adults with kidney diseases</b>                  | Adults with chronic kidney disease (Al-Shamsi et al. 2018)               | No costs estimated                                         | GP (10 min)                                          |
| <b>Nutrition: Care for adults with nutritional anaemia</b>              | Adults with anaemia (Global Nutrition Report)                            | No costs estimated                                         | GP (10 min)                                          |
| <b>Nutrition: Care for adults with food allergies and sensitivities</b> | People with nutrition-related allergies (Althumiri et al. 2021)          | No costs estimated                                         | GP (10 min), Specialist Doctor (30 min)              |
| <b>Management of food allergies and food intolerance</b>                | Children 0-14 x Global Prevalence of Allergies (3.0%)                    | No costs estimated                                         | GP (10 min), Specialist Doctor (30 min)              |
| <b>Preconception care</b>                                               | Married women or planning for marriage at reproductive age (15-49 years) | Estimate based on OHT drugs and supplies prices: USD 4.90  | Nurse (15 min), GP (15 min)                          |
| <b>Antenatal care</b>                                                   | Pregnant women                                                           | Estimate based on OHT drugs and supplies prices: USD 36.42 | GP (40 min), Radiographer (20 min), Midwife (40 min) |
| <b>Postnatal care</b>                                                   | Women who gave birth                                                     | No costs estimated                                         | Nurse (15 min), GP (15 min)                          |
| <b>Premarital screening program</b>                                     | Women (15-49) planning for a marriage                                    | Estimate based on OHT drugs and supplies prices: USD 15.66 | Nurse (15 min), GP (15 min)                          |

**Table S2-F. Country-specific assumptions (KSA)**

| Service                                                       | Population in Need                                                  | Drugs and Supply Costs | Labour Costs |
|---------------------------------------------------------------|---------------------------------------------------------------------|------------------------|--------------|
| <b>Screening: mammography</b>                                 | Women aged 40-70 should be screened every 2 years (50%)             | -                      | -            |
| <b>Post-treatment surveillance for breast cancer patients</b> | Based on country breast cancer incidence rate (WHO – IARC 2020)     | -                      | -            |
| <b>Post treatment surveillance for cervical cancer</b>        | Based on country cervix cancer incidence rate (WHO – IARC 2020)     | -                      | -            |
| <b>Screening: Sigmoidoscopy, colonoscopy</b>                  | People 50+ should be screened every 10 years (10%)                  | -                      | -            |
| <b>Post treatment surveillance for colorectal cancer</b>      | Based on country colorectal cancer incidence rate (WHO – IARC 2020) | -                      | -            |

**Table S3. References and assumptions used to estimate the total number of services delivered in 2019 in Oman**

| Immunization                                                                                 | Reference / Assumption                                                      |
|----------------------------------------------------------------------------------------------|-----------------------------------------------------------------------------|
| Measles vaccine                                                                              | MOH Health Statistics 2019 <sup>1</sup>                                     |
| Pentavalent vaccine                                                                          |                                                                             |
| Varicella vaccine                                                                            |                                                                             |
| DPT vaccination                                                                              |                                                                             |
| Polio vaccine                                                                                |                                                                             |
| BCG vaccine                                                                                  |                                                                             |
| Pneumococcal vaccine                                                                         |                                                                             |
| <b>Non-Communicable Diseases</b>                                                             |                                                                             |
| <b>CVD &amp; Diabetes</b>                                                                    |                                                                             |
| Screening for risk of CVD/Diabetes                                                           | Assumption: 5.0%                                                            |
| Follow-up care for those at low risk of CVD/Diabetes (Absolute Risk: 10-20%)                 | Assumption: 5.0%                                                            |
| Treatment for those with very high cholesterol but low absolute risk of CVD/Diabetes (< 20%) | Assumption derived from UHC Service Coverage Sub-Index on NCDs <sup>2</sup> |
| Treatment for those with high blood pressure but low absolute risk of CVD/Diabetes (< 20%)   |                                                                             |
| Treatment for those with absolute risk of CVD/Diabetes 20-30%                                |                                                                             |
| Treatment for those with high absolute risk of CVD/Diabetes (>30%)                           |                                                                             |
| Treatment of new cases of acute myocardial infarction (AMI) with aspirin                     |                                                                             |
| Treatment of cases with established ischaemic heart disease (IHD)                            |                                                                             |
| Treatment for those with established cerebrovascular disease and post stroke                 | Estimate from MOH Health Statistics 2019 <sup>1</sup>                       |
| Standard glycaemic control                                                                   |                                                                             |
| Intensive glycaemic control                                                                  |                                                                             |
| Referral for retinopathy screening                                                           |                                                                             |
| Neuropathy screening and preventive foot care                                                |                                                                             |
| <b>Breast Cancer</b>                                                                         |                                                                             |
| Basic breast cancer awareness                                                                | Assumption: 5.0%                                                            |
| Screening: clinical breast examination (CBE)                                                 | MOH Health Statistics <sup>1</sup>                                          |
| Diagnosis after screened with clinical breast exam                                           | Assumption derived from WHO-IARC 2020 <sup>3</sup>                          |
| <b>Cervical Cancer</b>                                                                       |                                                                             |
| Papanicolaou test (pap smear)                                                                | Assumption derived from Bahrain CR                                          |
| <b>Colorectal Cancer</b>                                                                     |                                                                             |
| Screening: faecal occult blood testing                                                       | Assumption derived from 'CBE'                                               |
| <b>Elderly and community care program</b>                                                    |                                                                             |
| Elderly and community care program                                                           | MOH Health Statistics 2019 <sup>1</sup>                                     |
| <b>Respiratory Disease</b>                                                                   |                                                                             |

|                                                                                 |                                                                         |
|---------------------------------------------------------------------------------|-------------------------------------------------------------------------|
| Asthma: Inhaled short acting beta agonist for intermittent asthma               | MOH Health Statistics 2019 <sup>1</sup>                                 |
| Asthma: Low dose inhaled fluticasone + SABA                                     |                                                                         |
| Asthma: High dose inhaled fluticasone + SABA                                    |                                                                         |
| Asthma: Theophylline + High dose inhaled fluticasone + SABA                     |                                                                         |
| Asthma: Oral Prednisolone + Theophylline + High dose inhaled fluticasone + SABA |                                                                         |
| COPD: smoking cessation                                                         |                                                                         |
| COPD: inhaled salbutamol                                                        |                                                                         |
| COPD: low-dose oral theophylline                                                |                                                                         |
| COPD: ipratropium inhaler                                                       |                                                                         |
| COPD: Exacerbation treatment with antibiotics                                   |                                                                         |
| COPD: Exacerbation treatment with oral prednisolone                             |                                                                         |
| COPD: Exacerbation treatment with oxygen                                        |                                                                         |
| Emergency care                                                                  |                                                                         |
| Average annual emergency care needs                                             | N/A                                                                     |
| <b>Child Health</b>                                                             |                                                                         |
| General                                                                         |                                                                         |
| Child general health                                                            | Assumption: 25% of GP visits (MOH Health Statistics 2019 <sup>1</sup> ) |
| Deworming                                                                       | Assumption derived from UHC Service Coverage Index (WHO) <sup>2</sup>   |
| Zinc supplementation                                                            |                                                                         |
| Diarrhea management                                                             |                                                                         |
| ORS                                                                             | Assumption derived from UHC Service Coverage Index (WHO) <sup>2</sup>   |
| Zinc (diarrhea treatment)                                                       |                                                                         |
| Antibiotics for treatment of dysentery                                          |                                                                         |
| Pneumonia                                                                       |                                                                         |
| Pneumonia treatment (children, mild cases)                                      | Estimate from MOH Health Statistics 2019 <sup>1</sup>                   |
| Malaria                                                                         |                                                                         |
| Malaria treatment (0-4, mild cases)                                             | Estimate from MOH Health Statistics 2019 <sup>1</sup>                   |
| School Health Program                                                           |                                                                         |
| Eye screening                                                                   | MOH Health Statistics 2019 <sup>1</sup>                                 |
| Dental screening                                                                |                                                                         |
| Ear screening                                                                   |                                                                         |
| <b>Nutrition</b>                                                                |                                                                         |
| Women of reproductive age and adolescent girls                                  |                                                                         |
| Intermittent iron-folic acid supplementation                                    | Assumption: 5%                                                          |
| Pregnant and lactating women                                                    |                                                                         |
| Daily iron and folic acid supplementation (pregnant women)                      | Estimate from MOH Health Statistics 2019 <sup>1</sup>                   |

|                                                                                                            |                                                                       |
|------------------------------------------------------------------------------------------------------------|-----------------------------------------------------------------------|
| Intermittent iron and folic acid supplementation (non-anaemic pregnant women)                              |                                                                       |
| Calcium supplementation for prevention and treatment of pre-eclampsia and eclampsia                        |                                                                       |
| Daily FAF, postpartum, anaemic women                                                                       | Estimate from MOH Health Statistics 2019 <sup>1</sup>                 |
| Intermittent FAF, postpartum, non-anaemic pregnant women                                                   |                                                                       |
| Adults                                                                                                     |                                                                       |
| Care for adults with low BMI                                                                               | Assumption: 2.5%                                                      |
| Children                                                                                                   |                                                                       |
| Breastfeeding counselling and support                                                                      | MOH Health Statistics 2019 <sup>1</sup>                               |
| Complementary feeding counselling and support                                                              | Assumption derived from UHC Service Coverage Index (WHO) <sup>2</sup> |
| Intermittent iron supplementation in children                                                              |                                                                       |
| Management of moderate acute malnutrition (children)                                                       | MOH Health Statistics 2019 <sup>1</sup>                               |
| <b>Mental Health</b>                                                                                       |                                                                       |
| Anxiety Disorders                                                                                          |                                                                       |
| Basic psychological treatment for anxiety disorders (mild cases).                                          | Estimate from MOH Health Statistics 2019 <sup>1</sup>                 |
| Basic psychosocial treatment and anti-depressant medication for anxiety disorders (mild to moderate cases) |                                                                       |
| Depression                                                                                                 |                                                                       |
| Basic psychosocial treatment for mild depression                                                           | Estimate from MOH Health Statistics 2019 <sup>1</sup>                 |
| Basic psychosocial treatment and anti-depressant medication of first episode (mild to moderate cases)      |                                                                       |
| Psychosocial care for peri-natal depression for mild cases only                                            |                                                                       |
| Psychosis                                                                                                  |                                                                       |
| Basic psychosocial support and anti-psychotic medication                                                   | Estimate from MOH Health Statistics 2019 <sup>1</sup>                 |
| Epilepsy                                                                                                   |                                                                       |
| Basic psychosocial support, advice, and follow-up only                                                     | Estimate from MOH Health Statistics 2019 <sup>1</sup>                 |
| Dementia                                                                                                   |                                                                       |
| Dementia screening, basic work up and referral to tertiary care                                            | Estimate from MOH Health Statistics 2019 <sup>1</sup>                 |
| Alcohol use/ dependence                                                                                    |                                                                       |
| Identification and assessment of new cases of alcohol use/dependence                                       | Estimate from MOH Health Statistics 2019 <sup>1</sup>                 |
| Brief interventions and follow-up for alcohol use/dependence                                               |                                                                       |
| Drug use/dependence                                                                                        |                                                                       |
| Identification and assessment of new cases of drug use/dependence                                          | Estimate from MOH Health Statistics 2019 <sup>1</sup>                 |
| Brief interventions and follow-up for drug use/dependence                                                  |                                                                       |
| Self-harm/suicide                                                                                          |                                                                       |
| Assess and care for person with self-harm                                                                  | Estimate from MOH Health Statistics 2019 <sup>1</sup>                 |
| Basic psychosocial treatment, advice, and follow-up for self-harm/suicide                                  |                                                                       |
| Pesticide intoxication management                                                                          |                                                                       |
| <b>Maternal Newborn and Reproductive Health</b>                                                            |                                                                       |

|                                                                                      |                                                                                   |
|--------------------------------------------------------------------------------------|-----------------------------------------------------------------------------------|
| Family planning                                                                      |                                                                                   |
| Pill - Progestin only                                                                | MOH Health Statistics 2019 <sup>1</sup>                                           |
| Condom - Male                                                                        |                                                                                   |
| Injectable - 3 month (Depo Provera)                                                  |                                                                                   |
| IUD - Copper-T 380-A IUD (10 years)                                                  |                                                                                   |
| Implant - Implanon (3 years)                                                         | Assumption: 0.5%                                                                  |
| LAM (Lactational Amenorrhea Method)                                                  | MOH Health Statistics 2019 <sup>1</sup>                                           |
| SDM (Standard Days Method)                                                           |                                                                                   |
| Periodic abstinence                                                                  |                                                                                   |
| Withdrawal                                                                           |                                                                                   |
| Management of ectopic pregnancy care                                                 |                                                                                   |
| Ectopic case management                                                              | Assumption: 100%                                                                  |
| Pregnancy care - ANC                                                                 |                                                                                   |
| Tetanus toxoid (pregnant women)                                                      | Estimate from MOH Health Statistics 2019 <sup>1</sup>                             |
| Syphilis screening (pregnant women)                                                  | MOH Health Statistics 2019 <sup>1</sup>                                           |
| Basic ANC                                                                            |                                                                                   |
| Pregnancy care - Treatment of pregnancy complications                                |                                                                                   |
| Hypertensive disorder case management                                                | Assumption: 99%                                                                   |
| Management of pre-eclampsia (Magnesium sulphate)                                     |                                                                                   |
| Management of other pregnancy complications                                          |                                                                                   |
| Deworming (pregnant women), part of general care and not specific for pregnant women | Assumption derived from UHC Service Coverage Sub-Index on RMNH (WHO) <sup>2</sup> |
| Childbirth care - Facility births                                                    |                                                                                   |
| Parenteral administration of uterotonics                                             | Estimate from MOH Health Statistics 2019 <sup>1</sup>                             |
| Labour and delivery management                                                       |                                                                                   |
| Pre-referral management of labour complications                                      |                                                                                   |
| MgSO <sub>4</sub> for eclampsia                                                      |                                                                                   |
| Neonatal resuscitation                                                               |                                                                                   |
| Treatment of local infections (newborn)                                              |                                                                                   |
| Kangaroo mother care                                                                 |                                                                                   |
| Feeding counselling and support for low-birth-weight infants                         |                                                                                   |
| Manual removal of placenta                                                           |                                                                                   |
| Postpartum care - Treatment of sepsis                                                |                                                                                   |
| Maternal sepsis case management                                                      | Estimate from MOH Health Statistics 2019 <sup>1</sup>                             |
| Postpartum care - Other                                                              |                                                                                   |
| Mastitis                                                                             | Estimate from UHC Service Coverage Sub-Index on RMNH (WHO) <sup>2</sup>           |
| Treatment of postpartum haemorrhage                                                  | Assumption: 100%                                                                  |



|                                                                 |                                                       |
|-----------------------------------------------------------------|-------------------------------------------------------|
| Other sexual and reproductive health                            |                                                       |
| Treatment of urinary tract infection (UTI)                      | MOH Health Statistics 2019 <sup>1</sup>               |
| Identification and management of infertility                    |                                                       |
| Treatment of syphilis                                           |                                                       |
| Treatment of gonorrhoea                                         |                                                       |
| Treatment of chlamydia                                          |                                                       |
| Treatment of trichomoniasis                                     |                                                       |
| Treatment of PID (Pelvic Inflammatory Disease)- mild cases only |                                                       |
| Menopause Program                                               |                                                       |
| Screen for urogenital dryness                                   | Assumption: 7.5%                                      |
| Screen for mood disorders                                       | Assumption: 7.5%                                      |
| General Practice                                                |                                                       |
| General Practice                                                | Estimate from MOH Health Statistics 2019 <sup>1</sup> |
| Oral Care                                                       |                                                       |
| Dental cleaning and preventive care                             | MOH Health Statistics 2019 <sup>1</sup>               |

**Table S4. References and assumptions used to estimate the total number of services delivered in 2019 in Bahrain**

|                                                                                              |                                                       |
|----------------------------------------------------------------------------------------------|-------------------------------------------------------|
| Immunization                                                                                 |                                                       |
| Rotavirus vaccine                                                                            | MOH Health Statistics 2019 <sup>4</sup>               |
| Measles vaccine                                                                              |                                                       |
| DPT vaccine                                                                                  |                                                       |
| Hib vaccine                                                                                  |                                                       |
| Hep B vaccine                                                                                |                                                       |
| Polio vaccine                                                                                |                                                       |
| BCG vaccine                                                                                  |                                                       |
| Pneumococcal vaccine                                                                         |                                                       |
| Varicella vaccine                                                                            | Estimate from MOH Health Statistics 2019 <sup>4</sup> |
| Influenza vaccine                                                                            | MOH Health Statistics 2019 <sup>4</sup>               |
| Non-Communicable Diseases                                                                    |                                                       |
| CVD & Diabetes                                                                               |                                                       |
| Screening for risk of CVD/Diabetes                                                           | Assumption: 5.0%                                      |
| Follow-up care for those at low risk of CVD/Diabetes (Absolute Risk: 10-20%)                 | Estimate from MOH Health Statistics 2019 <sup>4</sup> |
| Treatment for those with very high cholesterol but low absolute risk of CVD/Diabetes (< 20%) |                                                       |
| Treatment for those with high blood pressure but low absolute risk of CVD/Diabetes (< 20%)   |                                                       |
| Treatment for those with absolute risk of CVD/Diabetes 20-30%                                |                                                       |

|                                                                              |                                                                                                 |
|------------------------------------------------------------------------------|-------------------------------------------------------------------------------------------------|
| Treatment for those with high absolute risk of CVD/Diabetes (>30%)           |                                                                                                 |
| Treatment of new cases of acute myocardial infarction (AMI) with aspirin     |                                                                                                 |
| Treatment of cases with established ischaemic heart disease (IHD)            |                                                                                                 |
| Treatment for those with established cerebrovascular disease and post stroke |                                                                                                 |
| Treatment of cases with rheumatic heart disease (with benzathine penicillin) |                                                                                                 |
| Standard glycaemic control                                                   | Estimate from MOH Health Statistics 2019 <sup>4</sup>                                           |
| Intensive glycaemic control                                                  |                                                                                                 |
| Retinopathy screening                                                        |                                                                                                 |
| Neuropathy screening and preventive foot care                                |                                                                                                 |
| Breast Cancer                                                                |                                                                                                 |
| Basic breast cancer awareness                                                | Assumption: 5.0%                                                                                |
| Screening: clinical breast examination (CBE)                                 | MOH Health Statistics 2019 <sup>4</sup>                                                         |
| Cervical Cancer                                                              |                                                                                                 |
| Papanicolaou test (pap smear)                                                | MOH Health Statistics 2019 <sup>4</sup>                                                         |
| Colorectal Cancer                                                            |                                                                                                 |
| Screening: faecal occult blood testing                                       | Estimate from 'CBE' and 'pap smear'                                                             |
| Respiratory Disease                                                          |                                                                                                 |
| Asthma: Inhaled short acting beta agonist for intermittent asthma            | Assumption derived from UHC Service Coverage Sub-Index on NCDs (WHO) <sup>2</sup>               |
| Asthma: low dose inhaled beclomethasone + SABA                               |                                                                                                 |
| Asthma: high dose inhaled beclomethasone + SABA                              |                                                                                                 |
| COPD: smoking cessation                                                      |                                                                                                 |
| COPD: inhaled salbutamol                                                     |                                                                                                 |
| COPD: low-dose oral theophylline                                             |                                                                                                 |
| COPD: ipratropium inhaler                                                    |                                                                                                 |
| COPD: exacerbation treatment with antibiotics                                |                                                                                                 |
| COPD: exacerbation treatment with oral prednisolone                          |                                                                                                 |
| Emergency care                                                               |                                                                                                 |
| Average annual emergency care needs                                          | N/A                                                                                             |
| Child Health                                                                 |                                                                                                 |
| General Health                                                               |                                                                                                 |
| Child general health                                                         | Assumption: 25% of total number of GP Visit (MOH Health Statistics 2019 <sup>4</sup> )          |
| School Health                                                                |                                                                                                 |
| School Health                                                                | MOH Health Statistics 2019 <sup>4</sup>                                                         |
| Deworming                                                                    |                                                                                                 |
| Deworming                                                                    | Assumption derived from UHC Service Coverage Sub-Index on Infectious Disease (WHO) <sup>2</sup> |
| Diarrhea management                                                          |                                                                                                 |

|    |                                                                                                           |                                                                                                 |
|----|-----------------------------------------------------------------------------------------------------------|-------------------------------------------------------------------------------------------------|
| 1  | ORS                                                                                                       | Assumption derived from UHC Service Coverage Sub-Index on Infectious Disease (WHO) <sup>2</sup> |
| 2  | Pneumonia                                                                                                 |                                                                                                 |
| 3  | Pneumonia treatment (children)                                                                            | Assumption derived from UHC Service Coverage Sub-Index on Infectious Disease (WHO) <sup>2</sup> |
| 4  | Nutrition                                                                                                 |                                                                                                 |
| 5  | Women of reproductive age and adolescent girls                                                            |                                                                                                 |
| 6  | Intermittent iron-folic acid supplementation                                                              | Assumption: 5.0%                                                                                |
| 7  | Pregnant and lactating women                                                                              |                                                                                                 |
| 8  | Daily iron and folic acid supplementation (pregnant women)                                                | Assumption derived from UHC Service Coverage Sub-Index on RMCH (WHO) <sup>2</sup>               |
| 9  | Intermittent iron and folic acid supplementation (non-anaemic pregnant women)                             |                                                                                                 |
| 10 | Adults                                                                                                    |                                                                                                 |
| 11 | Care for adults with low BMI                                                                              | Estimate from MOH Health Statistics 2019 <sup>4</sup>                                           |
| 12 | Children                                                                                                  |                                                                                                 |
| 13 | Breastfeeding counselling and support                                                                     | Assumption derived from UHC Service Coverage Sub-Index on RMCH (WHO) <sup>2</sup>               |
| 14 | Complementary feeding counselling and support                                                             |                                                                                                 |
| 15 | Intermittent iron supplementation in children                                                             | Assumption derived from UHC Service Coverage Index (WHO) <sup>2</sup>                           |
| 16 | Mental Health                                                                                             |                                                                                                 |
| 17 | Anxiety Disorders                                                                                         |                                                                                                 |
| 18 | Basic psychological treatment for anxiety disorders (mild cases).                                         | Estimate from MOH Health Statistics 2019 <sup>4</sup>                                           |
| 19 | Basic psychosocial treatment and anti-depressant medication for anxiety disorders (moderate-severe cases) |                                                                                                 |
| 20 | Depression                                                                                                |                                                                                                 |
| 21 | Basic psychosocial treatment for mild depression                                                          | Estimate from MOH Health Statistics 2019 <sup>4</sup>                                           |
| 22 | Basic psychosocial treatment and anti-depressant medication of first episode moderate-severe cases        |                                                                                                 |
| 23 | Maternal Newborn and Reproductive Health                                                                  |                                                                                                 |
| 24 | Family planning                                                                                           |                                                                                                 |
| 25 | Pill - Progestin only                                                                                     | United Nations 2019 <sup>5</sup>                                                                |
| 26 | Injectable - 3 month (Depo Provera)                                                                       |                                                                                                 |
| 27 | Other contraceptives                                                                                      |                                                                                                 |
| 28 | IUCD follow-up care                                                                                       | Assumption derived from UHC Service Coverage Index (WHO) <sup>2</sup>                           |
| 29 | Pregnancy Care                                                                                            |                                                                                                 |
| 30 | Tetanus toxoid (pregnant women)                                                                           | Estimate from MOH Health Statistics 2019 <sup>4</sup>                                           |
| 31 | Syphilis detection and treatment (pregnant women)                                                         |                                                                                                 |
| 32 | Basic ANC                                                                                                 |                                                                                                 |
| 33 | Breast feeding education and advices                                                                      |                                                                                                 |
| 34 | Pregnancy care - Treatment of pregnancy complications                                                     |                                                                                                 |
| 35 | Deworming (pregnant women)                                                                                | Assumption: 100%                                                                                |
| 36 | Postpartum care - Other                                                                                   |                                                                                                 |

|                                                |                                                                                   |
|------------------------------------------------|-----------------------------------------------------------------------------------|
| Mastitis                                       | Assumption derived from UHC Service Coverage Sub-Index on RMCH (WHO) <sup>2</sup> |
| Breast feeding education and advices           |                                                                                   |
| Treatment of postpartum haemorrhage            | Assumption: 100%                                                                  |
| Other sexual and reproductive health           |                                                                                   |
| Treatment of urinary tract infection (UTI)     | Assumption derived from UHC Service Coverage Index (WHO) <sup>2</sup>             |
| Identification and management of infertility   |                                                                                   |
| Treatment of syphilis                          |                                                                                   |
| Treatment of gonorrhoea                        |                                                                                   |
| Treatment of chlamydia                         |                                                                                   |
| Treatment of trichomoniasis                    |                                                                                   |
| Treatment of PID (Pelvic Inflammatory Disease) |                                                                                   |
| General Practice                               |                                                                                   |
| General Practice                               | MOH Health Statistics 2019 <sup>4</sup>                                           |
| Oral Care                                      |                                                                                   |
| Dental cleaning and preventive care            | MOH Health Statistics 2019 <sup>4</sup>                                           |

**Table S5. References and assumptions used to estimate the total number of services delivered in 2019 in Kuwait**

|                             |                                         |
|-----------------------------|-----------------------------------------|
| Immunization                |                                         |
| Rotavirus vaccine           | MOH Health Statistics 2019 <sup>6</sup> |
| Measles vaccine             |                                         |
| Pentavalent vaccine         |                                         |
| DPT vaccine                 |                                         |
| Polio vaccine               |                                         |
| BCG vaccine                 |                                         |
| Pneumococcal vaccine        |                                         |
| Varicella vaccine           |                                         |
| DT Adult                    |                                         |
| Measles vaccine             |                                         |
| Varicella vaccine           |                                         |
| Influenza vaccine           |                                         |
| Meningococcal vaccine       |                                         |
| DT paediatrics              |                                         |
| Anti-Rabies                 |                                         |
| Heb B vaccine (paediatrics) |                                         |
| TT                          |                                         |

|                                                                                              |                                                                                   |
|----------------------------------------------------------------------------------------------|-----------------------------------------------------------------------------------|
| Non-Communicable Diseases                                                                    |                                                                                   |
| CVD & Diabetes                                                                               |                                                                                   |
| Screening for risk of CVD/Diabetes                                                           | Assumption: CR = 5.0%                                                             |
| Follow-up care for those at low risk of CVD/Diabetes (Absolute Risk: 10-20%)                 | Assumption derived from UHC Service Coverage Sub-Index on NCDs (WHO) <sup>2</sup> |
| Treatment for those with very high cholesterol but low absolute risk of CVD/Diabetes (< 20%) |                                                                                   |
| Treatment for those with high blood pressure but low absolute risk of CVD/Diabetes (< 20%)   |                                                                                   |
| Treatment for those with absolute risk of CVD/Diabetes 20-30%                                |                                                                                   |
| Treatment for those with high absolute risk of CVD/Diabetes (>30%)                           | Provided by MOH                                                                   |
| Treatment of new cases of acute myocardial infarction (AMI) with aspirin                     |                                                                                   |
| Treatment of cases with established ischaemic heart disease (IHD)                            |                                                                                   |
| Treatment for those with established cerebrovascular disease and post stroke                 | Estimate from MOH Health Statistics 2019 <sup>6</sup>                             |
| Standard glycaemic control                                                                   |                                                                                   |
| Intensive glycaemic control                                                                  |                                                                                   |
| Retinopathy screening                                                                        |                                                                                   |
| Neuropathy screening and preventive foot care                                                |                                                                                   |
| Breast Cancer                                                                                |                                                                                   |
| Basic breast cancer awareness                                                                | Assumption: CR = 5.0%                                                             |
| Screening: clinical breast examination                                                       | Assumption derived from Oman                                                      |
| Diagnosis after screened with clinical breast exam                                           | Estimate from WHO-IARC 2020 <sup>3</sup>                                          |
| Cervical Cancer                                                                              |                                                                                   |
| Papanicolaou test (pap smear)                                                                | Provided by MOH                                                                   |
| Colorectal Cancer                                                                            |                                                                                   |
| Screening: faecal occult blood testing                                                       | Provided by MOH                                                                   |
| Respiratory Disease                                                                          |                                                                                   |
| Asthma: inhaled short acting beta agonist for intermittent asthma                            | Estimation from data provided by MOH                                              |
| Asthma: low dose inhaled beclomethasone + SABA                                               |                                                                                   |
| Asthma: high dose inhaled beclomethasone + SABA                                              |                                                                                   |
| COPD: smoking cessation                                                                      |                                                                                   |
| COPD: inhaled salbutamol                                                                     |                                                                                   |
| COPD: low-dose oral theophylline                                                             |                                                                                   |
| COPD: ipratropium inhaler                                                                    |                                                                                   |
| COPD: exacerbation treatment with antibiotics                                                |                                                                                   |
| COPD: exacerbation treatment with oral prednisolone                                          |                                                                                   |
| Emergency care                                                                               |                                                                                   |
| Average annual emergency care needs                                                          | N/A                                                                               |
| Child Health                                                                                 |                                                                                   |

|                                                                                                           |                                                                                   |
|-----------------------------------------------------------------------------------------------------------|-----------------------------------------------------------------------------------|
| General Health                                                                                            |                                                                                   |
| Child general health                                                                                      | MOH Health Statistics 2019 <sup>6</sup>                                           |
| Deworming                                                                                                 |                                                                                   |
| Deworming                                                                                                 | Provided by MOH                                                                   |
| Diarrhea management                                                                                       |                                                                                   |
| ORS                                                                                                       | Estimate based on data provided by MOH                                            |
| Pneumonia                                                                                                 |                                                                                   |
| Pneumonia treatment (children)                                                                            | Provided by MOH                                                                   |
| Nutrition                                                                                                 |                                                                                   |
| Women of reproductive age and adolescent girls                                                            |                                                                                   |
| Intermittent iron-folic acid supplementation                                                              | Estimate from data provided by MOH                                                |
| Pregnant and lactating women                                                                              |                                                                                   |
| Daily iron and folic acid supplementation (pregnant women)                                                | Assumption derived from UHC Service Coverage Sub-Index on MRCH (WHO) <sup>2</sup> |
| Intermittent iron and folic acid supplementation (non-anaemic pregnant women)                             |                                                                                   |
| Adults                                                                                                    |                                                                                   |
| Care for adults with low BMI                                                                              | Assumption derived from Bahrain                                                   |
| Children                                                                                                  |                                                                                   |
| Breastfeeding counselling and support                                                                     | Assumption derived from UHC Service Coverage Sub-Index on MRCH (WHO) <sup>2</sup> |
| Complementary feeding counselling and support                                                             |                                                                                   |
| Intermittent iron supplementation in children                                                             | Assumption derived from UHC Service Coverage Index (WHO) <sup>2</sup>             |
| Mental Health                                                                                             |                                                                                   |
| Anxiety Disorders                                                                                         |                                                                                   |
| Basic psychological treatment for anxiety disorders (mild cases).                                         | OneHealth Tool <sup>7</sup>                                                       |
| Basic psychosocial treatment and anti-depressant medication for anxiety disorders (moderate-severe cases) |                                                                                   |
| Depression                                                                                                |                                                                                   |
| Basic psychosocial treatment for mild depression                                                          | OneHealth Tool <sup>7</sup>                                                       |
| Basic psychosocial treatment and anti-depressant medication of first episode moderate-severe cases        |                                                                                   |
| Maternal Newborn and Reproductive Health                                                                  |                                                                                   |
| Family planning                                                                                           |                                                                                   |
| Pill - Progestin only                                                                                     | United Nations 2019 <sup>5</sup>                                                  |
| Injectable - 3 month (depo provera)                                                                       |                                                                                   |
| Other contraceptives                                                                                      |                                                                                   |
| IUCD follow-up care                                                                                       | Assumption derived from UHC Service Coverage Index (WHO) <sup>2</sup>             |
| Management of abortion complications                                                                      |                                                                                   |
| Post-abortion case management                                                                             | Assumption (70.0%)                                                                |
| Pregnancy Care                                                                                            |                                                                                   |

|                                                       |                                                                       |
|-------------------------------------------------------|-----------------------------------------------------------------------|
| Tetanus toxoid (pregnant women)                       | Estimate based on data provided by MOH.                               |
| Syphilis detection and treatment (pregnant women)     |                                                                       |
| Basic ANC                                             |                                                                       |
| Breast feeding education and advices                  |                                                                       |
| Pregnancy care - Treatment of pregnancy complications |                                                                       |
| Deworming (pregnant women)                            | Assumption (100.0%)                                                   |
| Postpartum care - Other                               |                                                                       |
| Mastitis                                              | Assumption derived from UHC Service Coverage Index (WHO) <sup>2</sup> |
| Breast feeding education and advices                  |                                                                       |
| Treatment of postpartum haemorrhage                   | Estimate based on data provided by MOH.                               |
| Other sexual and reproductive health                  |                                                                       |
| Treatment of urinary tract infection (UTI)            | Provided by MOH                                                       |
| Cervical cancer screening                             |                                                                       |
| Identification and management of infertility          |                                                                       |
| Treatment of syphilis                                 | Estimate based on data provided by MOH                                |
| Treatment of gonorrhoea                               | Provided by MOH                                                       |
| Treatment of chlamydia                                | Estimate based on data provided by MOH                                |
| Treatment of trichomoniasis                           |                                                                       |
| Treatment of PID (Pelvic Inflammatory Disease)        | Provided by MOH                                                       |
| Other                                                 |                                                                       |
| Management of pre pubertal problems                   | Provided by MOH                                                       |
| Management of PCO                                     |                                                                       |
| Management of hirsutism                               | Estimate based on data provided by MOH                                |
| Management of irregular cycles                        | Provided by MOH                                                       |
| Management of amenorrhoea                             |                                                                       |
| Management of abnormal uterine bleeding               |                                                                       |
| Management of mild endometriosis                      |                                                                       |
| Postmenopausal care                                   |                                                                       |
| General Practice                                      |                                                                       |
| General Practice                                      | MOH Health Statistics 2019 <sup>6</sup>                               |
| Oral Care                                             |                                                                       |
| Dental cleaning and preventive care                   | MOH Health Statistics 2019 <sup>6</sup>                               |

**Table S6. References and assumptions used to estimate the total number of services delivered in 2019 in Qatar**

|                                                                                              |                                                                    |
|----------------------------------------------------------------------------------------------|--------------------------------------------------------------------|
| Immunization                                                                                 |                                                                    |
| Rotavirus vaccine                                                                            | Global Health Observatory (WHO) <sup>2</sup>                       |
| Measles vaccine                                                                              | Qatar Health Statistics 2019 <sup>8</sup>                          |
| DPT vaccine                                                                                  |                                                                    |
| Hib vaccine                                                                                  |                                                                    |
| Hep B vaccine                                                                                |                                                                    |
| Polio vaccine                                                                                |                                                                    |
| BCG vaccine                                                                                  |                                                                    |
| Pneumococcal vaccine                                                                         |                                                                    |
| Varicella vaccine                                                                            |                                                                    |
| Influenza vaccine                                                                            | Assumption derived from GCC countries                              |
| Non-Communicable Diseases                                                                    |                                                                    |
| CVD & Diabetes                                                                               |                                                                    |
| Screening for risk of CVD/Diabetes                                                           | Assumption: 5%                                                     |
| Follow-up care for those at low risk of CVD/Diabetes (Absolute Risk: 10-20%)                 | Estimate from PHCC Official Statistics                             |
| Treatment for those with very high cholesterol but low absolute risk of CVD/Diabetes (< 20%) |                                                                    |
| Treatment for those with high blood pressure but low absolute risk of CVD/Diabetes (< 20%)   |                                                                    |
| Treatment for those with absolute risk of CVD/Diabetes 20-30%                                |                                                                    |
| Treatment for those with high absolute risk of CVD/Diabetes (>30%)                           |                                                                    |
| Treatment of new cases of acute myocardial infarction (AMI) with aspirin                     |                                                                    |
| Treatment of cases with established ischaemic heart disease (IHD)                            |                                                                    |
| Treatment for those with established cerebrovascular disease and post stroke                 |                                                                    |
| Treatment of cases with rheumatic heart disease (with benzathine penicillin)                 |                                                                    |
| Standard glycaemic control                                                                   |                                                                    |
| Intensive glycaemic control                                                                  |                                                                    |
| Retinopathy screening                                                                        | Assumption: 1%                                                     |
| Neuropathy screening and preventive foot care                                                | Assumption: 1%                                                     |
| Breast Cancer                                                                                |                                                                    |
| Basic breast cancer awareness                                                                | Assumption: 5%                                                     |
| Screening: Clinical Breast Examination                                                       | Assumption derived from GCC countries and PHCC Official Statistics |
| Cervical Cancer                                                                              |                                                                    |
| Papanicolaou test (Pap smear)                                                                | Assumption derived from GCC countries and PHCC Official Statistics |
| Colorectal Cancer                                                                            |                                                                    |
| Screening: Fecal occult blood testing                                                        | Assumption derived from GCC countries and PHCC Official Statistics |
| Allied Health                                                                                |                                                                    |
| Allied Health                                                                                | PHCC Official Statistics                                           |



|    |                                                                                                           |                                                                                         |
|----|-----------------------------------------------------------------------------------------------------------|-----------------------------------------------------------------------------------------|
| 1  |                                                                                                           |                                                                                         |
| 2  |                                                                                                           |                                                                                         |
| 3  | Respiratory Disease                                                                                       |                                                                                         |
| 4  |                                                                                                           |                                                                                         |
| 5  | Asthma: Inhaled short acting beta agonist for intermittent asthma                                         | PHCC Official Statistics                                                                |
| 6  | Asthma: Low dose inhaled beclomethasone + SABA                                                            |                                                                                         |
| 7  | Asthma: High dose inhaled beclomethasone + SABA                                                           |                                                                                         |
| 8  |                                                                                                           |                                                                                         |
| 9  | COPD: Smoking cessation                                                                                   |                                                                                         |
| 10 | COPD: Inhaled salbutamol                                                                                  |                                                                                         |
| 11 | COPD: Low-dose oral theophylline                                                                          |                                                                                         |
| 12 | COPD: Ipratropium inhaler                                                                                 |                                                                                         |
| 13 | COPD: exacerbation treatment with antibiotics                                                             |                                                                                         |
| 14 | COPD: exacerbation treatment with oral prednisolone                                                       |                                                                                         |
| 15 |                                                                                                           |                                                                                         |
| 16 | Emergency care                                                                                            |                                                                                         |
| 17 |                                                                                                           |                                                                                         |
| 18 | Average annual emergency care needs                                                                       | N/A                                                                                     |
| 19 |                                                                                                           |                                                                                         |
| 20 | Child Health                                                                                              |                                                                                         |
| 21 |                                                                                                           |                                                                                         |
| 22 | General Health                                                                                            |                                                                                         |
| 23 |                                                                                                           |                                                                                         |
| 24 | Child General Health                                                                                      | Estimate from PHCC Official Statistics                                                  |
| 25 | General Health                                                                                            |                                                                                         |
| 26 |                                                                                                           |                                                                                         |
| 27 | School Health                                                                                             | PHCC Official Statistics                                                                |
| 28 |                                                                                                           |                                                                                         |
| 29 | Deworming                                                                                                 |                                                                                         |
| 30 | Deworming                                                                                                 | PHCC Official Statistics                                                                |
| 31 |                                                                                                           |                                                                                         |
| 32 | Diarrhea management                                                                                       |                                                                                         |
| 33 | ORS                                                                                                       | Assumption derived from UHC Service Coverage Index for Infectious Diseases <sup>2</sup> |
| 34 |                                                                                                           |                                                                                         |
| 35 | Pneumonia                                                                                                 |                                                                                         |
| 36 | Pneumonia treatment (children)                                                                            | Assumption derived from UHC Service Coverage Index for Infectious Diseases <sup>2</sup> |
| 37 |                                                                                                           |                                                                                         |
| 38 | Nutrition                                                                                                 |                                                                                         |
| 39 |                                                                                                           |                                                                                         |
| 40 | Women of reproductive age and adolescent girls                                                            |                                                                                         |
| 41 | Intermittent iron-folic acid supplementation                                                              | Assumption: 50%                                                                         |
| 42 |                                                                                                           |                                                                                         |
| 43 | Pregnant and lactating women                                                                              |                                                                                         |
| 44 | Daily iron and folic acid supplementation (pregnant women)                                                | Estimate from data provided by PHCC Official Statistics and World Bank <sup>9</sup>     |
| 45 | Intermittent iron and folic acid supplementation (non-anaemic pregnant women)                             |                                                                                         |
| 46 |                                                                                                           |                                                                                         |
| 47 | Adults                                                                                                    |                                                                                         |
| 48 | Care for adults with low BMI                                                                              | Assumption: 2.5%                                                                        |
| 49 |                                                                                                           |                                                                                         |
| 50 | Children                                                                                                  |                                                                                         |
| 51 | Breastfeeding counselling and support                                                                     | Assumption: 70%                                                                         |
| 52 |                                                                                                           |                                                                                         |
| 53 | Intermittent iron supplementation in children                                                             | Assumption derived from Zainel et al. (2018) <sup>10</sup>                              |
| 54 |                                                                                                           |                                                                                         |
| 55 | Mental Health                                                                                             |                                                                                         |
| 56 |                                                                                                           |                                                                                         |
| 57 | Anxiety Disorders                                                                                         |                                                                                         |
| 58 | Basic psychological treatment for anxiety disorders (mild cases).                                         | PHCC Official Statistics                                                                |
| 59 | Basic psychosocial treatment and anti-depressant medication for anxiety disorders (moderate-severe cases) |                                                                                         |
| 60 | Depression                                                                                                |                                                                                         |

|                                                                                                    |                                        |
|----------------------------------------------------------------------------------------------------|----------------------------------------|
| Basic psychosocial treatment for mild depression                                                   | PHCC Official Statistics               |
| Basic psychosocial treatment and anti-depressant medication of first episode moderate-severe cases |                                        |
| Maternal Newborn and Reproductive Health                                                           |                                        |
| Family planning                                                                                    |                                        |
| Contraception Management                                                                           | Estimate from PHCC Official Statistics |
| Management of abortion complications                                                               |                                        |
| Post-abortion case management                                                                      | Estimate from PHCC Official Statistics |
| Pregnancy Care                                                                                     |                                        |
| Tetanus toxoid (pregnant women)                                                                    | Estimate from PHCC Official Statistics |
| Syphilis detection and treatment (pregnant women)                                                  |                                        |
| Basic ANC                                                                                          |                                        |
| Breast feeding education and advices                                                               |                                        |
| Postpartum care - Other                                                                            |                                        |
| Postpartum Care Examination                                                                        | PHCC Official Statistics               |
| Treatment of postpartum haemorrhage                                                                |                                        |
| Other sexual and reproductive health                                                               |                                        |
| Treatment of urinary tract infection (UTI)                                                         | PHCC Official Statistics               |
| Identification and management of infertility                                                       |                                        |
| Treatment of syphilis                                                                              |                                        |
| Treatment of gonorrhoea                                                                            |                                        |
| Treatment of chlamydia                                                                             |                                        |
| Treatment of trichomoniasis                                                                        |                                        |
| Treatment of PID (Pelvic Inflammatory Disease)                                                     |                                        |
| General Practice                                                                                   |                                        |
| General Practice                                                                                   | PHCC Official Statistics               |
| Oral Care and Cancer                                                                               |                                        |
| Dental cleaning and preventive care                                                                | PHCC Official Statistics               |

**Table S7. References and assumptions used to estimate the total number of services delivered in 2019 in UAE**

|                      |                                         |
|----------------------|-----------------------------------------|
| Immunization         |                                         |
| Rotavirus vaccine    | WHO-UNICEF Estimates 2019 <sup>11</sup> |
| Measles vaccine      |                                         |
| DPT vaccine          |                                         |
| Hib vaccine          |                                         |
| Hep B vaccine        |                                         |
| Polio vaccine        |                                         |
| BCG vaccine          |                                         |
| Pneumococcal vaccine |                                         |

|    |                                                                                              |                                                                                   |                                                                                                                 |
|----|----------------------------------------------------------------------------------------------|-----------------------------------------------------------------------------------|-----------------------------------------------------------------------------------------------------------------|
| 1  | HPV vaccine                                                                                  | HPV Information Centre <sup>12</sup>                                              |                                                                                                                 |
| 2  | Influenza vaccine                                                                            | Assumption derived from Bahrain                                                   |                                                                                                                 |
| 3  | Non-Communicable Diseases                                                                    |                                                                                   |                                                                                                                 |
| 4  | CVD & Diabetes                                                                               |                                                                                   |                                                                                                                 |
| 5  | Screening for risk of CVD/Diabetes                                                           | Assumption: 5.0%                                                                  |                                                                                                                 |
| 6  | Follow-up care for those at low risk of CVD/Diabetes (Absolute Risk: 10-20%)                 | Assumption: 5.0%                                                                  |                                                                                                                 |
| 7  | Treatment for those with very high cholesterol but low absolute risk of CVD/Diabetes (< 20%) | Assumption derived from UHC Service Coverage Sub-Index on NCDs (WHO) <sup>2</sup> |                                                                                                                 |
| 8  | Treatment for those with high blood pressure but low absolute risk of CVD/Diabetes (< 20%)   |                                                                                   |                                                                                                                 |
| 9  | Treatment for those with absolute risk of CVD/Diabetes 20-30%                                |                                                                                   |                                                                                                                 |
| 10 | Treatment for those with high absolute risk of CVD/Diabetes (>30%)                           |                                                                                   |                                                                                                                 |
| 11 | Treatment of new cases of acute myocardial infarction (AMI) with aspirin                     |                                                                                   |                                                                                                                 |
| 12 | Treatment of cases with established ischaemic heart disease (IHD)                            |                                                                                   |                                                                                                                 |
| 13 | Treatment for those with established cerebrovascular disease and post stroke                 |                                                                                   |                                                                                                                 |
| 14 | Treatment of cases with rheumatic heart disease (with benzathine penicillin)                 |                                                                                   |                                                                                                                 |
| 15 | Standard glycaemic control                                                                   |                                                                                   | Estimate from OneHealth Tool <sup>7</sup> and Dubai Government Annual Health Statistics Book 2019 <sup>13</sup> |
| 16 | Intensive glycaemic control                                                                  |                                                                                   |                                                                                                                 |
| 17 | Retinopathy screening                                                                        |                                                                                   |                                                                                                                 |
| 18 | Neuropathy screening and preventive foot care                                                |                                                                                   |                                                                                                                 |
| 19 | Breast Cancer                                                                                |                                                                                   |                                                                                                                 |
| 20 | Basic breast cancer awareness                                                                | Assumption: 5.0%                                                                  |                                                                                                                 |
| 21 | Screening: Clinical Breast Examination                                                       | Estimate from Bahrain                                                             |                                                                                                                 |
| 22 | Screening: Mammography                                                                       | Assumption: 0.9%                                                                  |                                                                                                                 |
| 23 | Diagnosis after Screened with Clinical Breast Exam                                           | Estimation from WHO IARC 2020 <sup>3</sup>                                        |                                                                                                                 |
| 24 | Diagnosis after Screened with Mammography                                                    |                                                                                   |                                                                                                                 |
| 25 | Diagnosis without screening for breast cancer                                                |                                                                                   |                                                                                                                 |
| 26 | Cervical Cancer                                                                              |                                                                                   |                                                                                                                 |
| 27 | Visual inspection with acetic acid (VIA)                                                     | Assumption: 5.0%                                                                  |                                                                                                                 |
| 28 | Papanicolaou test (Pap smear)                                                                | Assumption: 9.3%                                                                  |                                                                                                                 |
| 29 | HPV DNA + VIA                                                                                | Assumption: 5.0%                                                                  |                                                                                                                 |
| 30 | Colorectal Cancer                                                                            |                                                                                   |                                                                                                                 |
| 31 | Screening: faecal immunochemical test                                                        | Assumption : 0.5%                                                                 |                                                                                                                 |
| 32 | Screening: faecal occult blood testing                                                       |                                                                                   |                                                                                                                 |
| 33 | Diagnosis for colorectal cancer screened with FIT                                            | Assumption: 100%                                                                  |                                                                                                                 |
| 34 | Diagnosis for colorectal cancer screened with FOBT                                           |                                                                                   |                                                                                                                 |
| 35 | Diagnosis without screening for colorectal cancer (symptom based)                            |                                                                                   |                                                                                                                 |
| 36 | Respiratory Disease                                                                          |                                                                                   |                                                                                                                 |
| 37 | Asthma: Inhaled short acting beta agonist for intermittent asthma                            | Assumption derived from UHC Service Coverage Sub-Index on NCDs (WHO) <sup>3</sup> |                                                                                                                 |
| 38 | Asthma: Low dose inhaled beclomethasone + SABA                                               |                                                                                   |                                                                                                                 |

|                                                                                                           |                                                                            |
|-----------------------------------------------------------------------------------------------------------|----------------------------------------------------------------------------|
| Asthma: High dose inhaled beclomethasone + SABA                                                           |                                                                            |
| COPD: Smoking cessation                                                                                   |                                                                            |
| COPD: Inhaled salbutamol                                                                                  |                                                                            |
| COPD: Ipratropium inhaler                                                                                 |                                                                            |
| COPD: exacerbation treatment with antibiotics                                                             |                                                                            |
| COPD: exacerbation treatment with oral prednisolone                                                       |                                                                            |
| COPD: exacerbation treatment with oxygen                                                                  |                                                                            |
| Emergency care                                                                                            |                                                                            |
| Average annual emergency care needs                                                                       | N/A                                                                        |
| Oral Care                                                                                                 |                                                                            |
| Oral and dental care                                                                                      | Estimate from Dubai Government Annual Health Statistics Book <sup>13</sup> |
| Child Health                                                                                              |                                                                            |
| General Health (Children)                                                                                 |                                                                            |
| General Health (Children)                                                                                 | Assumption: 25% of GP visits                                               |
| Diarrhea management                                                                                       |                                                                            |
| ORS                                                                                                       |                                                                            |
| Antibiotics for treatment of dysentery                                                                    | Assumption derived from UHC Service Coverage Index (WHO) <sup>2</sup>      |
| Pneumonia                                                                                                 |                                                                            |
| Pneumonia treatment (children)                                                                            | Assumption derived from UHC Service Coverage Index (WHO) <sup>2</sup>      |
| Routine Child Health Care Visit                                                                           |                                                                            |
| Routine Child Health Care Visit (< 1 year)                                                                |                                                                            |
| Routine Child Health Care Visit (1-5 years)                                                               | Assumption derived from UHC Service Coverage Index (WHO) <sup>2</sup>      |
| Nutrition                                                                                                 |                                                                            |
| Adults                                                                                                    |                                                                            |
| Care for Obese adults                                                                                     |                                                                            |
| Care for Diabetic adults                                                                                  |                                                                            |
| Care for adults with hyperuricemia                                                                        |                                                                            |
| Care for adults with kidney diseases                                                                      | Assumption: 5.0%                                                           |
| Care for adults with nutritional anaemia                                                                  |                                                                            |
| Care for adults with food allergies and sensitivities                                                     |                                                                            |
| All populations                                                                                           |                                                                            |
| Food fortification                                                                                        | Assumption: 100%                                                           |
| Children                                                                                                  |                                                                            |
| Management of severe malnutrition                                                                         |                                                                            |
| Management of moderate acute malnutrition                                                                 | Assumption derived from UHC Service Coverage Index (WHO) <sup>2</sup>      |
| Management of Food allergies or Food intolerances                                                         | Assumption: 5.0%                                                           |
| Mental Health                                                                                             |                                                                            |
| Anxiety Disorders                                                                                         |                                                                            |
| Basic psychosocial treatment and anti-depressant medication for anxiety disorders (moderate-severe cases) | Estimate from Abu Dhabi Government Annual Health Statistics <sup>14</sup>  |

|    |                                                                                                                           |                                                                                   |
|----|---------------------------------------------------------------------------------------------------------------------------|-----------------------------------------------------------------------------------|
| 1  | Basic psychological treatment for anxiety disorders (mild cases).                                                         |                                                                                   |
| 2  |                                                                                                                           |                                                                                   |
| 3  | Depression                                                                                                                |                                                                                   |
| 4  |                                                                                                                           |                                                                                   |
| 5  | Basic psychosocial treatment for mild depression                                                                          | Estimate from Abu Dhabi Government Annual Health Statistics <sup>14</sup>         |
| 6  | Basic psychosocial treatment and anti-depressant medication of first episode moderate-severe cases                        |                                                                                   |
| 7  | Intensive psychosocial treatment and anti-depressant medication of recurrent moderate-severe cases on a maintenance basis |                                                                                   |
| 8  | Psychological care for peri-natal                                                                                         |                                                                                   |
| 9  | Psychosis                                                                                                                 |                                                                                   |
| 10 | Basic psychosocial support and anti-psychotic medication                                                                  | Estimate from Abu Dhabi Government Annual Health Statistics <sup>14</sup>         |
| 11 | Bipolar Disorders                                                                                                         |                                                                                   |
| 12 | Basic psychosocial treatment, advice, and follow-up for bipolar disorder, plus mood-stabilizing medication                | Estimate from Abu Dhabi Government Annual Health Statistics <sup>14</sup>         |
| 13 | Epilepsy                                                                                                                  |                                                                                   |
| 14 | Basic psychosocial support, advice, and follow-up, plus anti-epileptic medication                                         | Estimate from Abu Dhabi Government Annual Health Statistics <sup>14</sup>         |
| 15 | Developmental Disorders                                                                                                   |                                                                                   |
| 16 | Basic psychosocial treatment, advice, and follow-up for developmental disorders                                           | Estimate from Abu Dhabi Government Annual Health Statistics <sup>14</sup>         |
| 17 | Conduct Disorders                                                                                                         |                                                                                   |
| 18 | Basic psychosocial treatment, advice, and follow-up for behavioural disorders                                             | Estimate from Abu Dhabi Government Annual Health Statistics <sup>14</sup>         |
| 19 | Attention Disorders                                                                                                       |                                                                                   |
| 20 | Methylphenidate medication                                                                                                | Estimate from Abu Dhabi Government Annual Health Statistics <sup>14</sup>         |
| 21 | Dementia                                                                                                                  |                                                                                   |
| 22 | Assessment, diagnosis, advice, and follow-up for dementia                                                                 | Estimate from Abu Dhabi Government Annual Health Statistics <sup>14</sup>         |
| 23 | Pharmacological treatment of dementia                                                                                     |                                                                                   |
| 24 | Alcohol Use/Dependence                                                                                                    |                                                                                   |
| 25 | Identification and assessment of new cases of alcohol use/dependence                                                      | Estimate from Abu Dhabi Government Annual Health Statistics <sup>14</sup>         |
| 26 | Drug Use/Dependence                                                                                                       |                                                                                   |
| 27 | Brief interventions and follow-up for drug use/dependence                                                                 | Estimate from Abu Dhabi Government Annual Health Statistics <sup>14</sup>         |
| 28 | Maternal Newborn and Reproductive Health                                                                                  |                                                                                   |
| 29 | Preconception Care (PCC)                                                                                                  |                                                                                   |
| 30 | Preconception Care (PCC)                                                                                                  | Assumption derived from UHC Service Coverage Sub-Index on MNCH (WHO) <sup>2</sup> |
| 31 | Antenatal Care (ANC)                                                                                                      |                                                                                   |
| 32 | Antenatal Care (ANC)                                                                                                      | Assumption: 99% ANC Coverage                                                      |
| 33 | Postnatal Care (PNC)                                                                                                      |                                                                                   |
| 34 | Postnatal Care (PNC)                                                                                                      | Assumption derived from UHC Service Coverage Sub-Index on MNCH (WHO) <sup>2</sup> |
| 35 | Premarital screening program                                                                                              |                                                                                   |
| 36 | Premarital screening program                                                                                              | Assumption: 100%                                                                  |
| 37 | General Practice                                                                                                          |                                                                                   |
| 38 | General Practice                                                                                                          | Estimate from Dubai Government Annual Health Statistics Book <sup>13</sup>        |
| 39 |                                                                                                                           |                                                                                   |
| 40 |                                                                                                                           |                                                                                   |
| 41 |                                                                                                                           |                                                                                   |
| 42 |                                                                                                                           |                                                                                   |
| 43 |                                                                                                                           |                                                                                   |
| 44 |                                                                                                                           |                                                                                   |
| 45 |                                                                                                                           |                                                                                   |
| 46 |                                                                                                                           |                                                                                   |
| 47 |                                                                                                                           |                                                                                   |
| 48 |                                                                                                                           |                                                                                   |
| 49 |                                                                                                                           |                                                                                   |
| 50 |                                                                                                                           |                                                                                   |
| 51 |                                                                                                                           |                                                                                   |
| 52 |                                                                                                                           |                                                                                   |
| 53 |                                                                                                                           |                                                                                   |
| 54 |                                                                                                                           |                                                                                   |
| 55 |                                                                                                                           |                                                                                   |
| 56 |                                                                                                                           |                                                                                   |
| 57 |                                                                                                                           |                                                                                   |
| 58 |                                                                                                                           |                                                                                   |
| 59 |                                                                                                                           |                                                                                   |
| 60 |                                                                                                                           |                                                                                   |

**Table S8. References and assumptions used to estimate the total number of services delivered in 2019 in KSA**

|                                                                                              |                                                                                   |
|----------------------------------------------------------------------------------------------|-----------------------------------------------------------------------------------|
| Immunization                                                                                 |                                                                                   |
| Measles vaccine                                                                              | MOH Statistical Yearbook 2019 <sup>15</sup>                                       |
| Pentavalent vaccine                                                                          |                                                                                   |
| Varicella vaccine                                                                            | Estimate from MOH Statistical Yearbook 2019 <sup>15</sup>                         |
| Polio vaccine                                                                                | MOH Statistical Yearbook 2019 <sup>15</sup>                                       |
| BCG vaccine                                                                                  |                                                                                   |
| Rubella vaccine                                                                              |                                                                                   |
| Pneumococcal vaccine                                                                         |                                                                                   |
| HPV vaccine                                                                                  | Assumption: 5.0%                                                                  |
| Non-Communicable Diseases                                                                    |                                                                                   |
| CVD & Diabetes                                                                               |                                                                                   |
| Screening for risk of CVD/Diabetes                                                           | Assumption: 5.0%                                                                  |
| Follow-up care for those at low risk of CVD/Diabetes (Absolute Risk: 10-20%)                 | Assumption: 5.0%                                                                  |
| Treatment for those with very high cholesterol but low absolute risk of CVD/Diabetes (< 20%) | Estimate from MOH Statistical Yearbook 2019 <sup>15</sup>                         |
| Treatment for those with high blood pressure but low absolute risk of CVD/Diabetes (< 20%)   |                                                                                   |
| Treatment for those with absolute risk of CVD/Diabetes 20-30%                                |                                                                                   |
| Treatment for those with high absolute risk of CVD/Diabetes (>30%)                           |                                                                                   |
| Treatment of new cases of acute myocardial infarction (AMI) with aspirin                     |                                                                                   |
| Treatment of cases with established ischaemic heart disease (IHD)                            |                                                                                   |
| Treatment for those with established cerebrovascular disease and post stroke                 | KSA World Health Survey <sup>16</sup>                                             |
| Treatment of cases with rheumatic heart disease (with benzathine penicillin)                 | Assumption derived from UHC Service Coverage Sub-Index on NCDs (WHO) <sup>2</sup> |
| Standard glycaemic control                                                                   | Estimate from MOH Statistical Yearbook 2019 <sup>15</sup>                         |
| Intensive glycaemic control                                                                  |                                                                                   |
| Neuropathy screening and preventive foot care                                                |                                                                                   |
| Breast Cancer                                                                                |                                                                                   |
| Basic breast cancer awareness                                                                | Assumption: 5.0%                                                                  |
| Screening: Clinical Breast Examination                                                       | Assumption derived from Bahrain                                                   |
| Screening: Mammography                                                                       | KSA World Health Survey <sup>16</sup>                                             |
| Diagnosis: Screened with clinical breast exam                                                | Estimate from WHO IARC 2020 <sup>3</sup>                                          |
| Diagnosis: Screened with mammogram                                                           |                                                                                   |
| Post-treatment surveillance for breast cancer patients                                       | Assumption derived from UHC Service Coverage Sub-Index on NCDs (WHO) <sup>2</sup> |
| Cervical Cancer                                                                              |                                                                                   |
| Papanicolaou test (Pap smear)                                                                | KSA World Health Survey <sup>16</sup>                                             |
| Post treatment surveillance for cervical cancer                                              | Assumption derived from UHC Service Coverage Sub-Index on NCDs (WHO) <sup>2</sup> |
| Colorectal Cancer                                                                            |                                                                                   |

|    |                                                                                 |                                                                                   |
|----|---------------------------------------------------------------------------------|-----------------------------------------------------------------------------------|
| 1  | Screening: faecal occult blood testing                                          |                                                                                   |
| 2  |                                                                                 |                                                                                   |
| 3  | Screening: Sigmoidoscopy                                                        | Estimate from Aljumah and Aljebreen (2017) <sup>17</sup>                          |
| 4  | Screening: Colonoscopy                                                          |                                                                                   |
| 5  | Diagnosis for colorectal cancer screened with FOBT                              |                                                                                   |
| 6  | Diagnosis without screening for colorectal cancer (symptom based)               | Estimation from WHO IARC 2020 <sup>3</sup>                                        |
| 7  | Post treatment surveillance for colorectal cancer                               | Assumption derived from UHC Service Coverage Sub-Index on NCDs (WHO) <sup>2</sup> |
| 8  | Respiratory Disease                                                             |                                                                                   |
| 9  | Asthma: Inhaled short acting beta agonist for intermittent asthma               | Estimate from MOH Statistical Yearbook 2019 <sup>15</sup>                         |
| 10 | Asthma: Low dose inhaled fluticasone + SABA                                     |                                                                                   |
| 11 | Asthma: High dose inhaled fluticasone + SABA                                    |                                                                                   |
| 12 | Asthma: Theophylline + High dose inhaled fluticasone + SABA                     |                                                                                   |
| 13 | Asthma: Oral Prednisolone + Theophylline + High dose inhaled fluticasone + SABA |                                                                                   |
| 14 | COPD: Smoking cessation                                                         |                                                                                   |
| 15 | COPD: Inhaled salbutamol                                                        |                                                                                   |
| 16 | COPD: Low-dose oral theophylline                                                |                                                                                   |
| 17 | COPD: Ipratropium inhaler                                                       |                                                                                   |
| 18 | COPD: exacerbation treatment with antibiotics                                   |                                                                                   |
| 19 | COPD: exacerbation treatment with oral prednisolone                             |                                                                                   |
| 20 | COPD: exacerbation treatment with oxygen                                        |                                                                                   |
| 21 | Emergency care                                                                  |                                                                                   |
| 22 | Average annual emergency care needs                                             | N/A                                                                               |
| 23 | Child Health                                                                    |                                                                                   |
| 24 | General                                                                         |                                                                                   |
| 25 | General Health (Children)                                                       | MOH Statistical Yearbook 2019 <sup>15</sup>                                       |
| 26 | Zinc supplementation                                                            | Assumption derived from UHC Service Coverage Index (WHO) <sup>2</sup>             |
| 27 | Diarrhea management                                                             |                                                                                   |
| 28 | ORS                                                                             | Assumption derived from UHC Service Coverage Index (WHO) <sup>2</sup>             |
| 29 | Zinc (diarrhea treatment)                                                       |                                                                                   |
| 30 | Antibiotics for treatment of dysentery                                          |                                                                                   |
| 31 | Treatment of severe diarrhea                                                    |                                                                                   |
| 32 | Pneumonia                                                                       |                                                                                   |
| 33 | Pneumonia treatment (children, mild cases)                                      | Assumption derived from UHC Service Coverage Index (WHO) <sup>2</sup>             |
| 34 | Treatment of severe pneumonia                                                   |                                                                                   |
| 35 | Nutrition                                                                       |                                                                                   |
| 36 | Women of reproductive age and adolescent girls                                  |                                                                                   |
| 37 | Intermittent iron-folic acid supplementation                                    | Estimate from Alreshidi et al. (2018) <sup>18</sup>                               |
| 38 | Pregnant and lactating women                                                    |                                                                                   |
| 39 | Daily iron and folic acid supplementation (pregnant women)                      | Estimate from Al-Duraibi and Am-Mutawa (2020) <sup>19</sup>                       |
| 40 | Intermittent iron and folic acid supplementation (non-anaemic pregnant women)   |                                                                                   |

|                                                                                                            |                                                                               |
|------------------------------------------------------------------------------------------------------------|-------------------------------------------------------------------------------|
| Vitamin A supplementation in pregnant women                                                                | Estimate from Azzeah and Refaat (2020) <sup>20</sup>                          |
| Iodine supplementation in pregnant women                                                                   |                                                                               |
| Adults                                                                                                     |                                                                               |
| Care for adults with low BMI                                                                               | Assumption derived from Bahrain                                               |
| Children                                                                                                   |                                                                               |
| Breastfeeding counselling and support                                                                      | Assumption derived from Service Coverage Sub-Index on MNCH (WHO) <sup>2</sup> |
| Complementary feeding counselling and support                                                              |                                                                               |
| Management of moderate acute malnutrition (children)                                                       | Assumption derived from UHC Service Coverage Index (WHO) <sup>2</sup>         |
| <b>Mental Health</b>                                                                                       |                                                                               |
| Anxiety disorders                                                                                          |                                                                               |
| Basic psychosocial treatment for anxiety disorders (mild cases)                                            | Assumption: 1.0%                                                              |
| Basic psychosocial treatment and anti-depressant medication for anxiety disorders (moderate-severe cases)  |                                                                               |
| Depression                                                                                                 |                                                                               |
| Basic psychosocial treatment for mild depression                                                           | Assumption: 1.0%                                                              |
| Basic psychosocial treatment and anti-depressant medication of first episode moderate-severe cases         |                                                                               |
| Psychosocial care for peri-natal depression                                                                |                                                                               |
| Psychosis                                                                                                  |                                                                               |
| Basic psychosocial support and anti-psychotic medication                                                   | Assumption: 1.0%                                                              |
| Bipolar disorder                                                                                           |                                                                               |
| Basic psychosocial treatment, advice, and follow-up for bipolar disorder, plus mood-stabilizing medication | Assumption: 1.0%                                                              |
| Epilepsy                                                                                                   |                                                                               |
| Basic psychosocial support, advice, and follow-up, plus anti-epileptic medication                          | Assumption: 1.0%                                                              |
| Developmental disorders                                                                                    |                                                                               |
| Basic psychosocial treatment, advice, and follow-up for developmental disorders                            | Assumption: 1.0%                                                              |
| Conduct disorders                                                                                          |                                                                               |
| Basic psychosocial treatment, advice, and follow-up for behavioural disorders                              | Assumption: 1.0%                                                              |
| Dementia                                                                                                   |                                                                               |
| Assessment, diagnosis, advice, and follow-up for dementia                                                  | Assumption: 1.0%                                                              |
| Alcohol use/dependence                                                                                     |                                                                               |
| Identification and assessment of new cases of alcohol use/dependence                                       | Assumption: 1.0%                                                              |
| Brief interventions and follow-up for alcohol use/dependence                                               |                                                                               |
| Drug use/dependence                                                                                        |                                                                               |
| Identification and assessment of new cases of drug use/dependence                                          | Assumption: 1.0%                                                              |
| Brief interventions and follow-up for drug use/dependence                                                  |                                                                               |
| Self-harm/suicide                                                                                          |                                                                               |
| Assess and care for person with self-harm                                                                  | Assumption: 1.0%                                                              |
| <b>Maternal Newborn and Reproductive Health</b>                                                            |                                                                               |
| Family planning                                                                                            |                                                                               |



|                                                       |                                                                                   |
|-------------------------------------------------------|-----------------------------------------------------------------------------------|
| Pill - Standard daily regimen                         | KSA World Health Survey <sup>16</sup>                                             |
| IUD - Copper-T 380-A IUD (10 years)                   |                                                                                   |
| Withdrawal                                            |                                                                                   |
| Pregnancy care - ANC                                  |                                                                                   |
| Tetanus toxoid (pregnant women)                       | Estimate from KSA World Health Survey <sup>16</sup>                               |
| Basic ANC                                             |                                                                                   |
| Pregnancy care - Treatment of pregnancy complications |                                                                                   |
| Hypertensive disorder case management                 | Assumption: 100%                                                                  |
| Childbirth care - Facility births                     |                                                                                   |
| Pre-referral management of labour complications       | Assumption: 100%                                                                  |
| Postpartum care - Other                               |                                                                                   |
| Treatment of postpartum haemorrhage                   | Assumption: 100%                                                                  |
| Other sexual and reproductive health                  |                                                                                   |
| Treatment of urinary tract infection (UTI)            | Assumption derived from UHC Service Coverage Sub-Index on MNCH (WHO) <sup>2</sup> |
| Treatment of syphilis                                 |                                                                                   |
| Treatment of gonorrhoea                               |                                                                                   |
| Treatment of chlamydia                                |                                                                                   |
| Treatment of trichomoniasis                           |                                                                                   |
| Treatment of PID (Pelvic Inflammatory Disease)        |                                                                                   |
| General Practice                                      |                                                                                   |
| General Practice                                      | MOH Statistical Yearbook 2019 <sup>15</sup>                                       |
| Oral Care                                             |                                                                                   |
| Dental cleaning and preventive care                   | MOH Statistical Yearbook 2019 <sup>15</sup>                                       |

## References

1. Sultanate of Oman Ministry of Health. Annual Health Report 2019, 2020.
2. World Health Organization. The Global Health Observatory, 2023.
3. International Agency for Research on Cancer. Global Cancer Observatory. Cancer Today.
4. Ministry of Health of Bahrain. Health Statistics 2019, 2021.
5. United Nations DoEaSA, Population Division,. Contraceptive Use by Method 2019: Data Booklet (ST/ESA/SER.A/435), 2019.
6. Ministry of Health of Kuwait. Annual Health Report 2019. Fifty Sixth Edition (LVI), 20220.
7. Avenir Health. OneHealth Tool. Intervention Assumptions, January 2016.
8. Qatar Planning and Statistics Authority. Health Services Statistics - Chapter 6 2019 [Available from: <https://www.psa.gov.qa/en/statistics1/pages/topicslisting.aspx?parent=Social&child=Health> accessed 24/01/2022 2022.
9. The World Bank. World Bank Open Data, 2022.
10. Zainel A, Osman SRO, Al-Kohji SMS, et al. Iron deficiency, its epidemiological features and feeding practices among infants aged 12 months in Qatar: a cross-sectional study. *BMJ Open* 2018;8(5):e020271. doi: 10.1136/bmjopen-2017-020271 [published Online First: 20180509]
11. World Health Organization and United Nations Children's Fund. WHO/UNICEF estimates of national immunization coverage 2022 [Available from: <https://www.who.int/teams/immunization-vaccines-and-biologicals/immunization-analysis-and-insights/global-monitoring/immunization-coverage/who-unicef-estimates-of-national-immunization-coverage> accessed 06/03/2022.
12. ICO/IARC HPV Information Centre. United Arab Emirates. Human Papillomavirus and Related Cancers, Fact Sheet 2019. 2019
13. Government of Dubai. Open Data Dashboards. Departement of Health 2022 [Available from: <https://www.dha.gov.ae/en/open-data> accessed 04/03/2022.
14. Government of Abu Dhabi. Open Data Dashboards. Departement of Health 2022 [Available from: <https://www.doh.gov.ae/en/resources/opendata> accessed 04/03/2022.
15. Ministry of Health of the Kingdom of Saudi Arabia. Statistical Yearbook 2019. Chapter IV. Health Activities 2021 [Available from: <https://www.moh.gov.sa/en/Ministry/Statistics/book/Pages/default.aspx>.
16. Ministry of Health of the Kingdom of Saudi Arabia. World Health Survey Saudi Arabia 2019. Final Report., 2019.
17. Aljumah AA, Aljebreen AM. Policy of screening for colorectal cancer in Saudi Arabia: A prospective analysis. *Saudi J Gastroenterol* 2017;23(3):161-68. doi: 10.4103/sjg.SJG\_468\_16
18. Alreshidi MA, Haridi HK. Prevalence of anemia and associated risk factors among pregnant women in an urban community at the North of Saudi Arabia. *J Prev Med Hyg* 2021;62(3):E653-e63. doi: 10.15167/2421-4248/jpmh2021.62.3.1880 [published Online First: 20210915]
19. AlDuraibi S, Al-Mutawa J. Knowledge and awareness of folic acid usage in Saudi pregnant women in Riyadh city from 2019-2020. *J Family Med Prim Care* 2020;9(10):5158-64. doi: 10.4103/jfmpc.jfmpc\_638\_20 [published Online First: 20201030]
20. Azzeh F, Refaat B. Iodine adequacy in reproductive age and pregnant women living in the Western region of Saudi Arabia. *BMC Pregnancy Childbirth* 2020;20(1):370. doi: 10.1186/s12884-020-03057-w [published Online First: 20200622]

# BMJ Open

## Economics of Primary Healthcare: Cost Estimation of Clinical Services at Primary Care Facilities in The Six Countries of The Gulf Cooperation Council.

|                                 |                                                                                                                                                                                                                                                                                                                                                                                                                                                                                                                                                                                                                                                                                                                                                                                                                                                                                                                                                                                                                                                                                                                                                                                                                                                                                                                                                                                                                                                                                                                   |
|---------------------------------|-------------------------------------------------------------------------------------------------------------------------------------------------------------------------------------------------------------------------------------------------------------------------------------------------------------------------------------------------------------------------------------------------------------------------------------------------------------------------------------------------------------------------------------------------------------------------------------------------------------------------------------------------------------------------------------------------------------------------------------------------------------------------------------------------------------------------------------------------------------------------------------------------------------------------------------------------------------------------------------------------------------------------------------------------------------------------------------------------------------------------------------------------------------------------------------------------------------------------------------------------------------------------------------------------------------------------------------------------------------------------------------------------------------------------------------------------------------------------------------------------------------------|
| Journal:                        | <i>BMJ Open</i>                                                                                                                                                                                                                                                                                                                                                                                                                                                                                                                                                                                                                                                                                                                                                                                                                                                                                                                                                                                                                                                                                                                                                                                                                                                                                                                                                                                                                                                                                                   |
| Manuscript ID                   | bmjopen-2023-079332.R1                                                                                                                                                                                                                                                                                                                                                                                                                                                                                                                                                                                                                                                                                                                                                                                                                                                                                                                                                                                                                                                                                                                                                                                                                                                                                                                                                                                                                                                                                            |
| Article Type:                   | Original research                                                                                                                                                                                                                                                                                                                                                                                                                                                                                                                                                                                                                                                                                                                                                                                                                                                                                                                                                                                                                                                                                                                                                                                                                                                                                                                                                                                                                                                                                                 |
| Date Submitted by the Author:   | 13-Jan-2024                                                                                                                                                                                                                                                                                                                                                                                                                                                                                                                                                                                                                                                                                                                                                                                                                                                                                                                                                                                                                                                                                                                                                                                                                                                                                                                                                                                                                                                                                                       |
| Complete List of Authors:       | <p>Elmusharaf, Khalifa; University of Birmingham Dubai, Public Health Poix, Sébastien; University of Limerick, School of Medicine Grafton, Daniel; United Nations Development Programme, Health and Development<br/> Jung, Johanna; United Nations Development Programme, Health and Development<br/> Gribble, Rebecca; United Nations Development Programme, Health and Development<br/> Stanton, Rachael; United Nations Development Programme, Health and Development<br/> Mahmoud, Lamia; World Health Organisation Regional Office for the Eastern Mediterranean<br/> Al Asfoor, Deena; World Health Organisation Regional Office for the Eastern Mediterranean, Health systems/ UHS<br/> Alawadi, Tayba; United Arab Emirates Ministry of Health &amp; Prevention<br/> Mustafa, Mohammed; United Arab Emirates Ministry of Health &amp; Prevention<br/> Shuwaiter, Lulwa; Kingdom of Bahrain Ministry of Health<br/> Alsuwaidan, Mohammed S.; Saudi Arabia Ministry of Health<br/> Al-Abri, Zahir; Government of Oman Ministry of Health<br/> Al-Sabahi, Sultana; Government of Oman Ministry of Health<br/> Fadda, Sherif; Primary Health Care Corporation<br/> Syed, Hassan Raza; Primary Health Care Corporation<br/> Almutairi, Muneera; Kuwait Ministry of Health<br/> Al-Farsi, Yahya; Sultan Qaboos University, College of Medicine &amp; Health Sciences<br/> Banatvala, Nicholas; World Health Organization<br/> Tarlton, Dudley; United Nations Development Programme, Health and Development</p> |
| <b>Primary Subject Heading</b>: | Health economics                                                                                                                                                                                                                                                                                                                                                                                                                                                                                                                                                                                                                                                                                                                                                                                                                                                                                                                                                                                                                                                                                                                                                                                                                                                                                                                                                                                                                                                                                                  |
| Secondary Subject Heading:      | Global health, Public health, Health policy                                                                                                                                                                                                                                                                                                                                                                                                                                                                                                                                                                                                                                                                                                                                                                                                                                                                                                                                                                                                                                                                                                                                                                                                                                                                                                                                                                                                                                                                       |
| Keywords:                       | HEALTH ECONOMICS, PUBLIC HEALTH, Primary Health Care, Health policy < HEALTH SERVICES ADMINISTRATION & MANAGEMENT                                                                                                                                                                                                                                                                                                                                                                                                                                                                                                                                                                                                                                                                                                                                                                                                                                                                                                                                                                                                                                                                                                                                                                                                                                                                                                                                                                                                 |
|                                 |                                                                                                                                                                                                                                                                                                                                                                                                                                                                                                                                                                                                                                                                                                                                                                                                                                                                                                                                                                                                                                                                                                                                                                                                                                                                                                                                                                                                                                                                                                                   |

1  
2  
3  
4  
5  
6  
7  
8  
9  
10  
11  
12  
13  
14  
15  
16  
17  
18  
19  
20  
21  
22  
23  
24  
25  
26  
27  
28  
29  
30  
31  
32  
33  
34  
35  
36  
37  
38  
39  
40  
41  
42  
43  
44  
45  
46  
47  
48  
49  
50  
51  
52  
53  
54  
55  
56  
57  
58  
59  
60

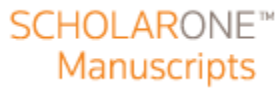

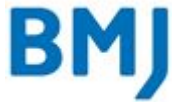

I, the Submitting Author has the right to grant and does grant on behalf of all authors of the Work (as defined in the below author licence), an exclusive licence and/or a non-exclusive licence for contributions from authors who are: i) UK Crown employees; ii) where BMJ has agreed a CC-BY licence shall apply, and/or iii) in accordance with the terms applicable for US Federal Government officers or employees acting as part of their official duties; on a worldwide, perpetual, irrevocable, royalty-free basis to BMJ Publishing Group Ltd ("BMJ") its licensees and where the relevant Journal is co-owned by BMJ to the co-owners of the Journal, to publish the Work in this journal and any other BMJ products and to exploit all rights, as set out in our [licence](#).

The Submitting Author accepts and understands that any supply made under these terms is made by BMJ to the Submitting Author unless you are acting as an employee on behalf of your employer or a postgraduate student of an affiliated institution which is paying any applicable article publishing charge ("APC") for Open Access articles. Where the Submitting Author wishes to make the Work available on an Open Access basis (and intends to pay the relevant APC), the terms of reuse of such Open Access shall be governed by a Creative Commons licence – details of these licences and which [Creative Commons](#) licence will apply to this Work are set out in our licence referred to above.

Other than as permitted in any relevant BMJ Author's Self Archiving Policies, I confirm this Work has not been accepted for publication elsewhere, is not being considered for publication elsewhere and does not duplicate material already published. I confirm all authors consent to publication of this Work and authorise the granting of this licence.

# Economics of Primary Healthcare: Cost Estimation of Clinical Services at Primary Care Facilities in The Six Countries of The Gulf Cooperation Council.

Khalifa Elmusharaf, Sébastien Poix, Daniel Grafton, Johanna Jung, Rebecca Gribble, Rachael Stanton, Lamia Mahmoud, Deena Alasfoor, Tayba Alawadi, Mohammed Mustafa, Luluah Shuwaiter, Mohamed Alsuwaidan, Zahir Al-Abri, Sultana Al-Sabahi, Sherif Fiddah, Hassan Raza Syed, Muneera Almutairi, Yahya Al-Farsi, Nicholas Banatvala, Dudley Tarlton

## Authors

|     |                     |                                                                         |                               |
|-----|---------------------|-------------------------------------------------------------------------|-------------------------------|
| 1.  | Khalifa Elmusharaf  | University of Birmingham Dubai                                          | k.elmusharaf@outlook.com      |
| 2.  | Sébastien Poix      | University of Limerick                                                  | sebastien.poix@ul.ie          |
| 3.  | Daniel Grafton      | United Nations Development Programme                                    | daniel.grafton@undp.org       |
| 4.  | Johanna S Jung      | United Nations Development Programme                                    | johanna.jung@undp.org         |
| 5.  | Rebecca Gribble     | United Nations Development Programme                                    | rebecca.gribble@undp.org      |
| 6.  | Rachael Stanton     | United Nations Development Programme                                    | rachael.stanton@undp.org      |
| 7.  | Lamia Mahmoud       | World Health Organisation Regional Office for the Eastern Mediterranean | mahmoudl@who.int              |
| 8.  | Deena Alasfoor      | World Health Organisation Regional Office for the Eastern Mediterranean | alasfoord@who.int             |
| 9.  | Tayba Alawadi       | United Arab Emirates Ministry of Health & Prevention                    | Tayba.Alawadi@mohap.gov.ae    |
| 10. | Mohammed Mustafa    | United Arab Emirates Ministry of Health & Prevention                    | mohammed.mustafa@mohap.gov.ae |
| 11. | Lulwa Showaiter     | Kingdom of Bahrain Ministry of Health                                   | lshowaiter@health.gov.bh      |
| 12. | Mohammed Alsuwaidan | Saudi Arabia Ministry of Health                                         | malsuwaidan@moh.gov.sa        |
| 13. | Zahir Al-Abri       | Government of Oman Ministry of Health                                   | zaherabri50@hotmail.com       |
| 14. | Sultana Al-Sabahi   | Government of Oman Ministry of Health                                   | al-sabahis@hotmail.com        |
| 15. | Sherif Fadda        | Primary Health Care Corporation, Qatar                                  | sfadda@phcc.gov.qa            |
| 16. | Hassan Raza Syed    | Primary Health Care Corporation, Qatar                                  | hsyed@phcc.gov.qa             |
| 17. | Muneera Almutairi   | Ministry of Health, Kuwait                                              | dr_mmmj@hotmail.com           |
| 18. | Yahya M. Al-Farsi   | Sultan Qaboos University                                                | yfmfarsi@squ.edu.om           |
| 19. | Nicholas Banatvala  | World Health Organisation                                               | banatvalan@who.int            |
| 20. | Dudley Tarlton      | United Nations Development Programme                                    | dudley.tarlton@undp.org       |

## Corresponding Author:

Sébastien Poix  
University of Limerick, School of Medicine  
Limerick, Ireland  
sebastien.poix@ul.ie

## ABSTRACT

**Objective.** While the Gulf Cooperation Council (GCC) countries have demonstrated a strong commitment to strengthening primary healthcare (PHC), the costs of delivering these services in this region remain relatively unexplored. Understanding the costs of PHC delivery is essential for effective resource allocation and health system efficiency.

**Design.** We used an ingredient-based method to estimate the cost of delivering a selection of services at PHC facilities in the six GCC countries in 2019. Services were categorized into eight programmes: immunisation; non-communicable diseases (NCDs); oral and dental care; child health; nutrition; mental health; reproductive, maternal, neonatal, and child health; and general practice. The cost estimation focused on two key ingredients: the costs of drugs and supplies, and the healthcare workforce cost. The coverage rates of specific types of health services, including screening and mental health services, were also estimated. Data for the analysis was obtained from ministries of health, health statistics reports, online databases, national surveys, and scientific literature.

**Results.** The estimated costs of delivering the selected services at public PHC facilities in the six GCC countries totalled US\$5.7 billion in 2019, representing 0.34% of the combined 2019 GDP. The per capita costs varied from US\$69 to US\$272. General practice and NCD programs constituted 79% of the total costs modelled, while mental health ranged between 0.0% and 0.3%. Over 8 million individuals did not receive NCD screening services, and over 30 million did not receive needed mental health services in public PHC facilities across the region.

**Conclusions.** To our knowledge, this is the first study to estimate the costs of services delivered at PHC facilities in the GCC countries. Identifying the main cost drivers and the services which individuals did not receive can be used to help strengthen PHC to improve efficiency and scale up needed services for better health outcomes.

**Keywords:** health economics, health services research, health systems

1  
2  
3  
4  
5  
6  
7  
8  
9  
10  
11  
12  
13  
14  
15  
16  
17  
18  
19  
20  
21  
22  
23  
24  
25  
26  
27  
28  
29  
30  
31  
32  
33  
34  
35  
36  
37  
38  
39  
40  
41  
42  
43  
44  
45  
46  
47  
48  
49  
50  
51  
52  
53  
54  
55  
56  
57  
58  
59  
60

## 1 STRENGTHS AND LIMITATIONS OF THIS STUDY

- 2
- 3
- 4
- 5
- 6
- 7
- 8
- 9
- 10
- 11
- 12
- 13
- 14
- 15
- 16
- 17
- 18
- 19
- 20
- 21
- 22
- 23
- 24
- 25
- 26
- 27
- 28
- 29
- 30
- 31
- 32
- 33
- 34
- 35
- 36
- 37
- 38
- 39
- 40
- 41
- 42
- 43
- 44
- 45
- 46
- 47
- 48
- 49
- 50
- 51
- 52
- 53
- 54
- 55
- 56
- 57
- 58
- 59
- 60
- 4
- 5
- 6
- 7
- 8
- 9
- 10
- 11
- The selection of services and the data collection phase were conducted in collaboration with the Ministries of Health in the six Gulf Countries.
- The study estimated the cost of delivering a limited number of services, which only reflects part of the expenditure incurred at the primary healthcare level.
- Due to variations in terms of services delivered, healthcare structure, public-private balance, and population demographics, comparative assessments must be approached cautiously.





1  
2  
3  
4  
5  
6  
7  
8  
9  
10  
11  
12  
13  
14  
15  
16  
17  
18  
19  
20  
21  
22  
23  
24  
25  
26  
27  
28  
29  
30  
31  
32  
33  
34  
35  
36  
37  
38  
39  
40  
41  
42  
43  
44  
45  
46  
47  
48  
49  
50  
51  
52  
53  
54  
55  
56  
57  
58  
59  
60

1 Arabia (KSA) and the United Arab Emirates (UAE). Second, to estimate the coverage rates of specific types  
2 of health services, including screening and mental health services.

For peer review only

## METHODS

### Scope of the study

This study estimates the cost of delivering a selection of services at PHC facilities in the public sector arranged under eight different programmes: (1) immunisation; (2) NCDs; (3) oral and dental care; (4) child health; (5) nutrition; (6) mental health; (7) reproductive, maternal, neonatal and child health; and (8) general practice. In this study, general practice included services delivered by physicians qualified to deliver primary care to individuals, their families and their communities through general practice medical training. A comprehensive list of services was extracted from the OneHealth Tool Costing Module(13). The list was then reviewed, adjusted, and validated with focal persons from the respective health ministry to ensure it accurately reflected the public PHC system. As a result, the services included in this analysis slightly varies from country to country. The services included for each country can be found in the supplemental materials (Supplemented Material 1).

### Patient and Public Involvement

Patients and/or the public were not involved in the design, conduct, reporting or dissemination plans of this research.

### Data sources

Demographic data were obtained from official population censuses or estimates(14-18). Disease prevalence and incidence were obtained from annual health statistics reports(19-22), national surveys, international or national databases, and local and regional literature. The number of services delivered was obtained from the focal persons from the health ministry or annual health statistics reports. When unavailable, we used proxy indicators or made assumptions based on regional and international literature. The costs of drugs and supplies and staff time requirements were extracted from the OneHealth Tool Costing Module(13), except for Qatar where standard drugs and supplies costs were completed by actual costs provided by the Primary Health Care Corporation (PHCC). However, the costs estimated in this study for Qatar remain lower than those reported by PHCC finance department due to the limited number of services included and the fact that our calculations focus solely on direct service delivery costs. Healthcare providers' annual salaries were obtained from the OneHealth Tool Costing Module(13) or the focal persons from the health ministry. When a clinical service not included in the initial list was added by the country, we estimated the drugs and supply costs and staff time requirements using data from the WHO-CHOICE database, WHO's review of vaccine price data(23), and relevant national reports or guidelines. The assumptions used in the model are presented in the supplemental materials (Supplemental Material 2 and 3).



1 visits annually. The assumptions used in the model are presented in the supplemental materials  
2 (Supplemental Material 2 and 3).

#### 3 4 **Specific coverage rate estimation method**

5  
6 In this analysis, we also estimated the coverage rates for certain programmes (NCDs, mental health),  
7 disease types (diabetes, cardiovascular diseases, respiratory diseases), and intervention types (screening  
8 services). In this case, the coverage rates were calculated by dividing the aggregated number of individuals  
9 who received a set of selected services by the corresponding population in need. The results do not reflect  
10 the actual coverage rate at the country level since we did not consider the percentage of people who may  
11 have received similar services outside public PHC.

## RESULTS

### Cost of the selected primary healthcare services

The costs of the selected services delivered at the public PHC level across the six countries were estimated at US\$5.7 billion in 2019. Table 1 presents the total costs for each country, as well as the cost per capita and the share of these costs in the current health expenditures (CHE) and government health expenditures (GHE). The highest cost per capita was observed in Kuwait (US\$272.16), followed by Qatar (US\$199.68). While KSA has the lowest per capita cost (US\$68.60), the country has the highest overall cost, with an estimated US\$2.3 billion in 2019. Overall, the cost of the selected services represents 0.34% of the six countries' combined 2019 GDP.

**Table 1. Cost of the selected clinical services\***

|                                    | Bahrain | Kuwait  | Oman   | Qatar  | KSA     | UAE     |
|------------------------------------|---------|---------|--------|--------|---------|---------|
| <b>Total costs (US\$, Million)</b> | 159.7   | 1,203.0 | 298.8  | 558.9  | 2,347.4 | 1,180.3 |
| <b>Per capita cost (US\$)</b>      | 107.62  | 272.16  | 112.55 | 199.68 | 68.60   | 120.83  |
| <b>Total costs (% of CHE)</b>      | 10.3    | 16.3    | 9.6    | 12.7   | 5.2     | 6.6     |
| <b>Total costs (% of GHE)</b>      | 24.2    | 18.6    | 10.9   | 17.0   | 8.3     | 11.8    |
| <b>Total costs (% of GDP)</b>      | 0.41    | 0.88    | 0.34   | 0.32   | 0.28    | 0.28    |

\* The costs presented in this table include the 20% increase for overhead costs  
CHE = Current Health Expenditure, GHE= Government Health Expenditures

### Costs distribution

Table 2 shows the distribution of the costs disaggregated by programme. The costs related to general practice were the most prominent in five of the six countries (52.7-77.0%), while in Qatar the NCDs programme made up the largest share of total costs (57.4%). In the five other countries, the share of the NCDs programmes varied from 6.9% in Bahrain to 19.8% in the UAE. The child health programme is another significant cost driver that accounts for between 4.2% (KSA) to 20.3% (Bahrain) of the total costs. Taken altogether, these three programmes represent 80.0-93.3% of the costs modelled in the six countries. The mental health programme had the lowest costs across all six countries, with between 0.0% (Bahrain, Oman) and 0.3% (UAE) of the costs modelled in the study.

**Table 2. Cost of the selected clinical services disaggregated by programme in 2019 (US\$, Million)\***

|                         | Bahrain     | Kuwait       | Oman         | Qatar        | KSA            | UAE          |
|-------------------------|-------------|--------------|--------------|--------------|----------------|--------------|
| <b>General practice</b> | <b>77.7</b> | <b>610.4</b> | <b>130.5</b> | <b>109.1</b> | <b>1,445.7</b> | <b>497.1</b> |

|                             |              |              |              |              |                |                |
|-----------------------------|--------------|--------------|--------------|--------------|----------------|----------------|
| % of total costs            | 60.8         | 63.4         | 54.6         | 24.4         | 77.0           | 52.7           |
| <b>NCDs</b>                 | <b>8.8</b>   | <b>109.3</b> | <b>36.0</b>  | <b>256.5</b> | <b>189.8</b>   | <b>187.2</b>   |
| % of total costs            | 6.9          | 11.4         | 15.1         | 57.4         | 10.1           | 19.8           |
| <b>Child health</b>         | <b>26.0</b>  | <b>162.0</b> | <b>44.8</b>  | <b>51.4</b>  | <b>79.1</b>    | <b>177.9</b>   |
| % of total costs            | 20.3         | 16.8         | 18.7         | 11.5         | 4.2            | 18.8           |
| <b>Immunisation</b>         | <b>3.7</b>   | <b>10.9</b>  | <b>10.1</b>  | <b>14.9</b>  | <b>75.0</b>    | <b>20.6</b>    |
| % of total costs            | 2.9          | 1.1          | 4.2          | 3.3          | 4.0            | 2.2            |
| <b>Oral and dental care</b> | <b>4.5</b>   | <b>41.3</b>  | <b>6.1</b>   | <b>5.0</b>   | <b>25.3</b>    | <b>30.2</b>    |
| % of total costs            | 3.6          | 4.3          | 2.5          | 1.1          | 1.3            | 3.2            |
| <b>Nutrition</b>            | <b>4.5</b>   | <b>16.0</b>  | <b>6.6</b>   | <b>2.2</b>   | <b>25.2</b>    | <b>3.5</b>     |
| % of total costs            | 3.5          | 1.7          | 2.8          | 0.5          | 1.3            | 0.4            |
| <b>RMCH</b>                 | <b>2.5</b>   | <b>11.8</b>  | <b>5.0</b>   | <b>7.7</b>   | <b>36.5</b>    | <b>25.1</b>    |
| % of total costs            | 1.9          | 1.2          | 2.1          | 1.7          | 1.9            | 2.7            |
| <b>Mental health</b>        | <b>0.1</b>   | <b>0.8</b>   | <b>0.0</b>   | <b>0.5</b>   | <b>1.2</b>     | <b>2.7</b>     |
| % of total costs            | <0.01        | 0.1          | 0.0          | 0.1          | 0.1            | 0.3            |
| <b>Total</b>                | <b>127.8</b> | <b>962.5</b> | <b>239.1</b> | <b>447.3</b> | <b>1,877.9</b> | <b>1,180.3</b> |

\* The costs presented in this table do not include the 20% increase for overhead costs

### Non-communicable diseases

The costs of the clinical services related to diabetes, cardiovascular diseases and chronic respiratory diseases (asthma and chronic obstructive pulmonary diseases) were estimated at US\$676 million in 2019 across all six countries (Table 3). As these diseases are three of the major NCDs, we sought to understand the cost burden associated with managing and treating them. Based on the coverage rates and populations in need, we estimated that 14,911,170 individuals did not receive the services they needed at public PHC facilities in 2019.

**Table 3. Cost of clinical services provided and estimated number of patients who did not receive services needed at the public PHC level for diabetes, cardiovascular and respiratory diseases**

|                 | Cost (US\$, Million)* | % of total costs | Estimated number of patients who did not receive the services needed at the public PHC level |
|-----------------|-----------------------|------------------|----------------------------------------------------------------------------------------------|
| <b>Bahrain</b>  | 5.03                  | 3.9%             | 284,410                                                                                      |
| <b>Kuwait</b>   | 102.75                | 10.7%            | 947,920                                                                                      |
| <b>Oman**</b>   | 32.27                 | 13.5%            | 376,910                                                                                      |
| <b>Qatar***</b> | 254.44                | 56.9%            | 1,458,590                                                                                    |
| <b>KSA</b>      | 108.07                | 5.8%             | 9,950,800                                                                                    |
| <b>UAE</b>      | 173.16                | 18.3%            | 1,892,540                                                                                    |

|              |        |  |            |
|--------------|--------|--|------------|
| <b>Total</b> | 675.72 |  | 14,911,170 |
|--------------|--------|--|------------|

\* The costs presented in this table do not include the 20% increase for overhead costs

\*\* Coverage rate was calculated considering Omani nationals only.

\*\*\* In Qatar, costing data was directly provided by the Primary Healthcare Corporation (PHCC). Services delivered by other providers, such as the Red Crescent, were not included in the study.

## NCD screening services

Table 4 shows the costs and coverage rates of seven NCD screening services (screening for risk of cardiovascular diseases and diabetes, clinical breast examination, pap smear, faecal occult blood test, and screening for diabetes complications). The total cost of these screening services across all six countries was estimated at US\$18.1 million in 2019. In all countries, these costs account for less than 1% of the total costs modelled. Based on the coverage rates and populations in need, we estimated that 30,435,980 individuals did not receive the screening services they needed at public PHC facilities in 2019.

**Table 4. Cost and coverage rate for services provided and estimated number of patients who did not receive services needed at the public PHC level for screening services**

|                 | Cost (Million, US\$)* | % of total costs | Coverage rate (%) | Estimated number of patients who did not receive the services needed at the public PHC level |
|-----------------|-----------------------|------------------|-------------------|----------------------------------------------------------------------------------------------|
| <b>Bahrain</b>  | 0.9                   | 0.7%             | 6%                | 1,058,870                                                                                    |
| <b>Kuwait</b>   | 1.1                   | 0.1%             | 6%                | 3,184,360                                                                                    |
| <b>Oman**</b>   | 0.2                   | 0.1%             | 7%                | 953,920                                                                                      |
| <b>Qatar***</b> | 2.0                   | 0.5%             | 4%                | 1,445,050                                                                                    |
| <b>KSA</b>      | 5.8                   | 0.3%             | 5%                | 18,912,380                                                                                   |
| <b>UAE</b>      | 8.1                   | 0.9%             | 5%                | 4,881,400                                                                                    |
| <b>Total</b>    | <b>18.1</b>           |                  |                   | <b>30,435,980</b>                                                                            |

\* The costs presented in this table do not include the 20% increase for overhead costs

\*\* Coverage rate was calculated considering Omani nationals only.

\*\*\* In Qatar, costing data was directly provided by the Primary Healthcare Corporation (PHCC). Services delivered by other providers, such as the Red Crescent, were not included in the study.

## Mental health services

The total cost of mental health services was estimated at US\$5.3 million in 2019 across all six countries (Table 5). These costs made up between 0.0% (Bahrain, Oman) and 0.3% (UAE) of the total costs modelled. Based on the coverage rates and populations in need, we estimated that 8,724,160 individuals did not receive the mental services they needed at public PHC facilities in 2019.



**Table 5. Cost and coverage rate for services provided and estimated number of patients who did not receive services needed at the public PHC level for mental health services**

|                 | Cost (Million, US\$)* | % of total costs | Coverage rate (%) | Estimated number of patients who did not receive the services needed at the public PHC level |
|-----------------|-----------------------|------------------|-------------------|----------------------------------------------------------------------------------------------|
| <b>Bahrain</b>  | 0.1                   | 0.0%             | 2%                | 206,090                                                                                      |
| <b>Kuwait</b>   | 0.8                   | 0.1%             | 8%                | 267,310                                                                                      |
| <b>Oman**</b>   | 0.0                   | 0.0%             | 0%                | 142,890                                                                                      |
| <b>Qatar***</b> | 0.5                   | 0.1%             | 2%                | 430,720                                                                                      |
| <b>KSA</b>      | 1.2                   | 0.1%             | 1%                | 6,993,490                                                                                    |
| <b>UAE</b>      | 2.7                   | 0.3%             | 4%                | 683,660                                                                                      |
| <b>Total</b>    | <b>5.3</b>            |                  |                   | 8,724,160                                                                                    |

\* The costs presented in this table do not include the 20% increase for overhead costs

\*\* Coverage rate was calculated considering Omani nationals only. Mental health services are not provided within primary care in Oman.

\*\*\* In Qatar, costing data was directly provided by the Primary Healthcare Corporation (PHCC). Services delivered by other providers, such as the Red Crescent, were not included in the study.

## DISCUSSION

This study aimed to estimate the cost of selected clinical services provided at public PHC facilities in the six countries of the GCC. By assessing the costs of delivering multiple programmes, including general practice, child health, immunisation, oral and dental care, nutrition, reproductive, maternal, neonatal and child health, and mental health at the public PHC level, this study underscores the importance of strengthening the public PHC and provide policymakers with crucial cost estimates to inform resource allocation and strategic planning for achieving improved health outcomes. This research, the first of this kind in the region, also highlights the significance of conducting tailored assessments that take into account the diverse healthcare landscapes of countries. Furthermore, our findings offer a foundation for future comparative analyses, fostering a deeper understanding of global variations in PHC financing. The findings indicate that the cost of selected services across eight programmes exceeded US\$5.7 billion in 2019. While these costs represent 0.34% of the combined GDP in 2019, WHO recommends that countries allocate at least 1% of their GDP to PHC(24). It is crucial to note that the estimated costs in our study do not encompass the entirety of PHC expenditures, making it challenging to assess our results in relation to WHO's recommendation. We observed significant variations in per capita cost, with KSA having the lowest (US\$68) and Kuwait having the highest (US\$217) cost. We attribute these variations to different reasons. Firstly, each country has a unique health system, which includes varying proportions of private care delivery and different healthcare delivery organisation. Secondly, the differences in population structure may also affect the costs of these services. The diverse demographic profiles of the six countries may influence the prevalence of certain health conditions, the demand for specific services, and the overall utilisation of PHC. For instance, Saudi Arabia has a higher proportion of its population aged less than 19, while the UAE has a larger working-age population(25). These variations in population structure have implications for healthcare demand, notably regarding NCDs. Another element to consider is the differences in the proportion of non-nationals across the six countries(26). In the UAE and Qatar, the population is predominantly composed of non-nationals, whereas KSA has a majority of nationals. To address this particularity, countries have established unique health coverage mechanisms, creating variations in PHC utilisation(27). Lastly, these variations also result from differences in what interventions are delivered at the PHC level as opposed to other healthcare system levels, as well as coverage rates. While these factors demonstrate the complexity of comparing the cost of clinical services delivered at PHC facilities, this study allowed us to identify the main cost drivers and make recommendations. A study conducted in Indonesia in 2020 shares some methodological similarities with this one(28). This study aimed to estimate the costs of reaching national health targets at the primary healthcare level between 2020-2024 using the OneHealth Tool. Nevertheless, a direct comparison between the two studies remains challenging due to significant variations in interventions and programmes, and the more comprehensive costing approach used by the Indonesian study. These differences highlight the nuanced nature of primary healthcare costing,

1  
2  
3 1 emphasising the need for context-specific assessments tailored to the unique healthcare landscapes of  
4 2 individual regions or countries.  
5  
6 3  
7

8 4 Generally, the services classified under general practice were the main drivers of the total costs in all  
9 5 countries, followed by services related to preventing, treating, and managing NCDs. The large share of  
10 6 general practice in the total costs can be explained by the many services included within this programme.  
11 7 Costs of services related to NCDs are likely due to the high prevalence of these diseases, particularly  
12 8 diabetes, cardiovascular and respiratory diseases, in the six countries. A previous study found that NCDs  
13 9 killed nearly 43,000 people in the Gulf countries in 2019 and generated an economic burden estimated at  
14 10 around US\$50 billion, equivalent to 3.3% of the GDP(29). We also observed that the share of costs  
15 11 associated with these services is significantly higher in Qatar (57.4%) than in the five other countries, where  
16 12 it ranges from 6.9% to 19.8%. This factor could be attributed to Qatar being the only country where actual  
17 13 drugs and supplies costs were used in this analysis. Indeed, the actual unit costs provided by Qatar were  
18 14 significantly higher than those extracted from the OneHealth Tool, which were used for the remaining five  
19 15 countries. This suggests that the overall costs for these countries may have been underestimated.  
20 16 However, this could not be verified with the other countries. The substantial contribution of NCD-related  
21 17 services to the total costs modelled also reflects a shift of healthcare demands towards NCDs that countries  
22 18 have been experiencing over the past decades. The GCC countries have made significant strides in the  
23 19 prevention and control of NCDs, most of them having multisectoral coordination mechanisms,  
24 20 comprehensive strategies and targeted programmes(29). For example, the UAE launched 42 NCD clinics  
25 21 between 2017 and 2018 and trained PHC staff in the early detection and management of NCDs(30). Our  
26 22 findings also indicate that mental health services made up between 0.0% and 0.3% of the costs of the  
27 23 selected services. A few countries have taken commendable steps to respond to the increasing prevalence  
28 24 of mental health conditions, such as Bahrain, which established school mental health clinics, implemented  
29 25 a training programme for family physicians, and upgraded its guidelines for mental health(6). However,  
30 26 these programmes did not reach the same level of maturity as other NCD programmes, and ensuring better  
31 27 access to mental health services and reducing the stigma surrounding mental health conditions remain key  
32 28 challenges in the region.  
33  
34 29

35 30 In terms of coverage, the study estimated that approximately 15 million people did not receive necessary  
36 31 NCDs-associated services, and around 9 million people did not receive necessary mental health services at  
37 32 the public PHC level across all six countries in 2019. As the analysis only modelled the cost of services  
38 33 delivered at the public PHC level, individuals could have received these services in the private sector or at  
39 34 the secondary or tertiary level of the public sector. For example, around 67,000 mental health visits were  
40 35 recorded in Oman through extended healthcare centres in 2019(20), but none were included in our costing  
41 36 model.  
42  
43  
44  
45  
46  
47  
48  
49  
50  
51  
52  
53  
54  
55  
56  
57  
58  
59  
60

1  
2  
3 1  
4  
5 2 We estimated that, across the six countries, around 30 million people did not receive the NCD screening  
6 3 services they required in public PHC. This includes screening for cardiovascular diseases, cervical, breast  
7  
8 4 and colorectal cancers, diabetes and diabetes complications. Additionally, we found that the coverage  
9  
10 5 rates for these seven services were consistently low across the countries, ranging from an average of 4%  
11 6 in Qatar to 7% in Oman. While these results show relatively low access to screening services, they should  
12  
13 7 be qualified by the consideration that screening and awareness-related activities are rarely directly  
14  
15 8 captured in health statistics records and health surveys, making them difficult to estimate accurately.  
16  
17 9  
18 10

### 11 **Limitations**

12  
13 13 This study had some limitations which must be considered when interpreting the results. Firstly, the list of  
14  
15 14 services included in this study did not include all PHC services. It is also important to note that the selection  
16  
17 15 of services may inadvertently introduce a bias towards NCDs because of the greater representation of these  
18  
19 16 services among those available in the OneHealth Tool Costing Module. To mitigate this potential risk, we  
20  
21 17 actively engaged with the six Ministries of Health during the selection process, allowing them to include  
22  
23 18 additional services. Even if a risk of bias remains, we considered the greater representation of NCD-related  
24  
25 19 services to reflect the current activity and priorities of the public PHC in each country. Secondly, it is  
26  
27 20 important to note that services included in the general practice programme could potentially overlap with  
28  
29 21 other programmes. Challenges related to clearly delineating this programme in each of the six countries  
30  
31 22 introduce uncertainty regarding the distribution of the costs per programme. Thirdly, the drugs and supply  
32  
33 23 costs for each clinical service were estimated using cost assumptions from the OneHealth Tool Costing  
34  
35 24 Module, except for Qatar where primary data was collected. Fourthly, service coverage data was not  
36  
37 25 always available, which required making assumptions based on similar interventions or available data from  
38  
39 26 neighbouring countries. The coverage rates must be interpreted with caution as they only reflect the  
40  
41 27 number of services delivered at the public PHC level, and some services may also be delivered at other  
42  
43 28 levels of the public health system and/or in the private sector. Moreover, without detailed information on  
44  
45 29 the proportion of individuals utilising private care instead of public care, it becomes challenging to fully  
46  
47 30 contextualise and evaluate the coverage rates. Fifthly, the study did not have information on overhead  
48  
49 31 costs such as training, programme management, supervision, monitoring and evaluation, communication,  
50  
51 32 infrastructure and equipment, transportation, and advocacy, and an estimation of 20% of the total costs  
52  
53 33 was agreed upon to account for this. Finally, comparisons between countries and with other published  
54  
55 34 estimates of PHC spending should be made with caution due to differences in the number and nature of  
56  
57 35 the clinical services included for each country, variations in the healthcare system and population structure,  
58  
59 36 and different data sources used.  
60 37

## Recommendations

The significance of robust PHC in establishing effective and efficient health systems is well acknowledged by all six GCC countries. They have made commendable strides in strengthening PHC by adapting to the evolving disease burden of their populations, as evident from the allocation of substantial costs to NCD services in this study. The comprehensive costing analysis presented in this report sheds light on specific areas where further enhancements in PHC services and resource allocation across the GCC countries can be made. To reap substantial health and economic advantages, the following recommended actions deserve consideration:

- 1. Strengthen the primary health workforce:** To address the shortage of skilled healthcare professionals in the primary care sector, the GCC countries should focus on increasing investment in training, attracting, and retaining local Family Physicians (FPs) and General Practitioners (GPs). This can be achieved through incentivising primary care training programmes, such as providing scholarships for nationals pursuing careers in primary care professions. Scaling up the primary health workforce will involve initial and ongoing training and remuneration costs, but the potential health and economic gains justify this investment.
- 2. Expand NCD prevention and screening services:** Investing in disease prevention and routine screening services at the public PHC level is vital for strong PHC. The GCC countries have an opportunity to scale up their screening services for NCDs in public PHC, as over 30 million people in the region did not receive the required NCD screening services in 2019. To assess coverage fully, further research into private sector service provision and primary care coverage in the GCC countries is recommended. Scale-up of PHC services should be done with a focus on accessibility, equity, and achieving universal health coverage.
- 3. Scale-up mental health services:** Despite progress in ensuring access to mental health services and reducing stigma, the majority of mental health services are still delivered at the secondary or tertiary level in the GCC region. Integrating mental health screening and care services into public PHC, especially in general practice, can improve accessibility and lead to better health outcomes compared to treatment at higher-level facilities. Scaling up mental health services at the PHC level aligns with a people-centered approach to PHC that addresses health and disease comprehensively.
- 4. Enhance regional collaboration and policy coherence:** The GCC countries share common challenges and opportunities in strengthening PHC. Establishing a GCC PHC Coordination Committee with regular meetings to share best practices, lessons learned, and promote legislative

1  
2  
3 1 action will support regional collaboration. The committee should focus on NCD prevention,  
4 2 screening, and treatment at the PHC level, and consider establishing a database to track progress  
5 3 and emerging challenges in NCD-related targets and indicators. Regional strategies and action  
6 4 plans should be developed to further promote policy coherence and collaboration.  
7  
8  
9  
10

- 11 6 5. **Invest in research and monitoring of PHC:** To improve the efficiency and health outcomes of PHC  
12 7 systems in the GCC region, there should be a focus on research and monitoring. By integrating an  
13 8 effectiveness perspective into this research, GCC countries could identify quick wins, as well as  
14 9 areas and services that require more resources or could be run more efficiently. Scaling up  
15 10 research and monitoring into PHC will provide a stronger evidence base and enable assessment of  
16 11 the impact of potential changes in PHC service delivery. Additionally, defining UHC health benefits  
17 12 packages will facilitate modelling costs associated with the included services.  
18  
19  
20  
21  
22

23 14 By implementing these recommendations, the GCC countries can strengthen their PHC systems, leading to  
24 15 improved health outcomes and more efficient resource allocation. These actions will contribute to building  
25 16 effective and robust health systems that effectively address the changing disease burden of the population.  
26  
27  
28  
29  
30  
31  
32  
33  
34  
35  
36  
37  
38  
39  
40  
41  
42  
43  
44  
45  
46  
47  
48  
49  
50  
51  
52  
53  
54  
55  
56  
57  
58  
59  
60

## CONCLUSION

To our knowledge, this study is the first that aimed to estimate the costs of services delivered at PHC in the GCC countries. The findings indicate that general practice, child health, and NCDs, particularly diabetes, cardiovascular and respiratory diseases, were the main cost drivers. This study also shows that, in all countries, a significant number of individuals didn't receive essential services, such as screening for NCDs or mental health services, at the public PHC level. Based on these results, we recommend actions to increase the availability and accessibility of prevention and screening services, integrate mental health screening and care services into primary care, and expand research and monitoring efforts on PHC investment, both in the public and private sectors.

**Abbreviations**

|      |                                |
|------|--------------------------------|
| FP   | Family Physician               |
| GCC  | Gulf Cooperation Council       |
| CHE  | Current Health Expenditures    |
| GHE  | Government Health Expenditures |
| KSA  | Kingdom of Saudi Arabia        |
| PHC  | Primary Healthcare             |
| PHCC | Primary Healthcare Corporation |
| NCD  | Non-Communicable Disease       |
| UAE  | United Arab Emirates           |
| UHC  | Universal Health Coverage      |
| WHO  | World Health Organization      |



## Acknowledgements

The authors express their sincere gratitude to the Ministries of Health in the GCC, the national teams that supported the data collection and analysis, and the stakeholders who took the time to review and improve this work. The publication also greatly benefited from the contributions of WHO and UNDP Regional Offices, Dr Elfatih Abdelraheem (UNDP), Dr Awad Mataria (WHO EMRO), Dr Hassan Salah (WHO EMRO), Dr Faraz Khalid (WHO), Dr Hicham El Berri (WHO EMRO), Dr Nasim Pourghazian (WHO EMRO), Dr Alexey Kulikov (UN Interagency Task Force on NCDs), and Dr Suleiman Aldakheel (Gulf Health Council).

## Competing Interests

The authors declare no conflict of interest.

## Funders

This study received financial support from the Gulf Health Council for the Cooperation Council States (N/A).

**Twitter:** @elmusharaf1, @DudleyTarlton, @nickbanatvala

## Contributors

KE and SP substantially contributed to the conception, methodology development and data collection; conducted the data analysis, economic modelling and interpretation of data; and drafted the manuscript. DG, JJ, RG, and RS substantially contributed to the conception and design, literature search, data collection, interpretation of data and drafting of the manuscript. TA, MM, LS, MA, ZA, SA, SF, HRS, and MA contributed to data collection and interpretation of data and revised the article critically for important intellectual content. LM, DA, YA, NB, and DT contributed to the conception and design, provided guidance on scope and interpretation of results, and revised the article critically for important intellectual content. KE, SP and DG are responsible for the overall content as guarantors. All authors approved the version of the manuscript to be published.

## Data availability statement

All data relevant to the study are included in the article or uploaded as supplementary information.

## Ethics statements

Ethics approval was not required for this economic evaluation study. We used publicly accessible documents and data to conduct the economic analysis.

1  
2  
3  
4  
5  
6  
7  
8  
9  
10  
11  
12  
13  
14  
15  
16  
17  
18  
19  
20  
21  
22  
23  
24  
25  
26  
27  
28  
29  
30  
31  
32  
33  
34  
35  
36  
37  
38  
39  
40  
41  
42  
43  
44  
45  
46  
47  
48  
49  
50  
51  
52  
53  
54  
55  
56  
57  
58  
59  
60

1 **Patient and Public Involvement**

2  
3 Patients and/or the public were not involved in the design, conduct, reporting or dissemination plans of  
4 this research.

For peer review only

1  
2  
3 1 REFERENCES  
4  
5 2  
6  
7 3  
8 4  
9 5  
10 6  
11 7  
12 8  
13 9  
14 10  
15 11  
16 12  
17 13  
18 14  
19 15  
20 16  
21 17  
22 18  
23 19  
24 20  
25 21  
26 22  
27 23  
28 24  
29 25  
30 26  
31 27  
32 28  
33 29  
34 30  
35 31  
36 32  
37 33  
38 34  
39 35  
40 36  
41 37  
42 38  
43 39  
44 40  
45 41  
46 42  
47 43  
48 44  
49 45  
50 46  
51 47  
52 48  
53 49  
54 50  
55 51  
56 52  
57 53  
58  
59  
60

1. OECD. Realising the Potential of Primary Health Care. Paris: OECD Publishing, 2020.
2. Starfield B. Is primary care essential? *Lancet* 1994;344(8930):1129-33. doi: 10.1016/s0140-6736(94)90634-3
3. Macinko J, Starfield B, Shi L. The contribution of primary care systems to health outcomes within Organization for Economic Cooperation and Development (OECD) countries, 1970-1998. *Health Serv Res* 2003;38(3):831-65. doi: 10.1111/1475-6773.00149
4. World Health Organization and United Nations Children's Fund (UNICEF). Operational framework for primary health care: transforming vision into action. Geneva, Switzerland, 2020:132.
5. Salah H. KM. Family Practice in the Eastern Mediterranean Region. Universal Health Coverage and Quality Primary Care. Florida, USA: Taylor and Francis Group 2018.
6. Elmusharaf K, Grafton D, Roberts E, et al. The Case for Investment in Prevention and Control of Non-communicable Diseases in Bahrain. Geneva: UNDP, WHO, UNIATF, GHC, 2021.
7. Elmusharaf K, Menescal B, Roberts E, et al. The Case for Investment in Prevention and Control of Non-communicable Diseases in Kuwait. Geneva: UNDP, WHO, UNIATF, GHC, 2021.
8. Elmusharaf K, Roberts E, Chestnov R, et al. The Case for Investment in Prevention and Control of Non-communicable Diseases in Oman. Geneva: UNDP, WHO, UNIATF, GHC, 2021.
9. Elmusharaf K, Stanton R, Chestnov R, et al. The Case for Investment in Prevention and Control of Non-communicable Diseases in Qatar. Geneva: UNDP, WHO, UNIATF, GHC, 2021.
10. Grafton D, Elmusharaf K, Jung J, et al. The Case for Investment in Prevention and Control of Non-communicable Diseases in the Kingdom of Saudi Arabia. Geneva: UNDP, WHO, UNIATF, GHC, 2021.
11. Elmusharaf K, Chestnov R, Jung J, et al. The Case for Investment in Prevention and Control of Non-communicable Diseases in the United Arab Emirates. Geneva: UNDP, WHO, UNIATF, GHC, 2021.
12. World Health Organization RCftEM. Progress report on strengthening primary health care based health systems, 2009.
13. Avenir Health. OneHealth Tool. Intervention Assumptions, January 2016.
14. Sultanate of Oman. National Centre for Statistics and Information. Data Portal. Population. 2022 [Available from: <https://data.gov.om/OMPOP2016/population?indicator=1000140&region=1000020-muscat&nationality=1000010-omani> accessed 24/01/2022.
15. Bahrain Information & eGovernment Authority. Open Data Portal. Census and Demographic Statistics. 2019 [Available from: <https://www.data.gov.bh/explore/?sort=modified&refine.publisher=Information+%26+eGovernment+Authority&q=census&refine.keyword=Census+2020&refine.theme=Population> accessed 24/01/2022.
16. Qatar Planning and Statistics Authority. First Section. Population and Social Statistics 2019 [Available from: <https://www.psa.gov.qa/en/statistics1/pages/topicslisting.aspx?parent=Population&child=Population> accessed 24/01/2022 2022.
17. Kuwait Public Authority for Civil Information. Population Estimates of Kuwait by Age Group, Nationality & Gender. 2019 [Available from: <http://stat.paci.gov.kw> accessed 24/01/2022 2022.
18. Saudi Arabia General Authority for Statistics. Population by Gender , Age Groups and Nationality (Saudi/Non-Saudi) 2020 [Available from: <https://www.stats.gov.sa/en/5680> accessed 24/01/2022 2022.
19. Ministry of Health of Bahrain. Health Statistics 2019, 2021.
20. Sultanate of Oman Ministry of Health. Annual Health Report 2019, 2020.
21. Ministry of Health of Kuwait. Annual Health Report 2019. Fifty Sixth Edition (LVI), 20220.
22. Ministry of Health of the Kingdom of Saudi Arabia. Statistical Yearbook 2019. Chapter IV. Health Activities 2021 [Available from: <https://www.moh.gov.sa/en/Ministry/Statistics/book/Pages/default.aspx>.
23. Europe WHOROf. Review of vaccine price data: submitted by WHO European Region Member States through the WHO/UNICEF Joint Reporting Form for 2013. Copenhagen: World Health Organization. Regional Office for Europe, 2015.
24. World Health Organization. Primary health care on the road to universal health coverage: 2019 monitoring report, 2019.
25. United Nations. World Population Prospects 2022, Online Edition, 2022.
26. Shayah H, Sun Z. Employment in the Gulf Cooperation Council (GCC) Countries – Current Issues and Future Trends2019.

- 1  
2  
3 1 27. Fadhil I, Ali R, Al-Raisi SS, et al. Review of National Healthcare Systems in the Gulf Cooperation Council  
4 2 Countries for Noncommunicable Diseases Management. *Oman Med J* 2022;37(3):e370. doi:  
5 3 10.5001/omj.2021.96 [published Online First: 20220510]  
6 4 28. Ali PB SD, Setiawan E, Nadjib M, Hafidz F, Thalagala N, Lang E, Dutta A, Silva R, Cantelmo C, Stein D,. Cost to  
7 5 Achieve Indonesia's Mid-Term Development Plan (RPJMN) 2020-2024 Targets: A Primary Healthcare  
8 6 Costing Approach Using the OneHealth Tool. Jakarta: Ministry of National Development  
9 7 Planning/National Development Planning Agency, 2020.  
10 8 29. Elmusharaf K, Grafton D, Jung JS, et al. The case for investing in the prevention and control of non-  
11 9 communicable diseases in the six countries of the Gulf Cooperation Council: an economic evaluation.  
12 10 *BMJ Glob Health* 2022;7(6) doi: 10.1136/bmjgh-2022-008670  
13 11 30. Fadhil I, Belaila B, Razzak HA. National accountability and response for noncommunicable diseases in the  
14 12 United Arab Emirates. *International Journal of Noncommunicable Diseases* 2019;4:4 - 9.  
15 13

For peer review only

## Economics of Primary Healthcare: Cost Estimation of Clinical Services at Primary Care Facilities in The Six Countries of The Gulf Cooperation Council.

Khalifa Elmusharaf, Sébastien Poix, Daniel Grafton, Johanna Jung, Rebecca Gribble, Rachael Stanton, Nicholas Banatvala, Lamia Mahmoud, Deena Alasfoor, Tayba Alawadi, Mohammed Mustafa, Luluah Shuwaiter, Mohamed Alsuwaidan, Zahir Al-Abri, Sultana Al-Sabahi, Sherif Fiddah, Hassan Raza Syed, Muneera Almutairi, Yahya Al-Farsi, Dudley Tarlton

### Supplementary Materials

**Table S1. List of selected services by country**

| Service                                            | Bahrain | KSA | Kuwait | Oman | Qatar | UAE |
|----------------------------------------------------|---------|-----|--------|------|-------|-----|
| <b>Immunization</b>                                |         |     |        |      |       |     |
| Anti-rabies                                        |         |     | X      |      |       |     |
| BCG vaccine                                        | X       | X   | X      | X    | X     | X   |
| DPT vaccine                                        | X       |     | X      | X    | X     | X   |
| DT Adult                                           |         |     | X      |      |       |     |
| DT paediatrics                                     |         |     | X      |      |       |     |
| Heb B vaccine (paediatrics)                        |         |     | X      |      |       |     |
| Hep B vaccine                                      | X       |     |        |      | X     | X   |
| Hib vaccine                                        | X       |     |        |      | X     | X   |
| HPV vaccine                                        |         | X   |        |      |       | X   |
| Influenza vaccine                                  | X       |     | X      |      | X     | X   |
| Measles vaccine                                    | X       | X   | X      | X    | X     | X   |
| Meningococcal vaccine                              |         |     | X      |      |       |     |
| Pentavalent vaccine                                |         | X   | X      | X    |       |     |
| Pneumococcal vaccine                               | X       | X   | X      | X    | X     | X   |
| Polio vaccine                                      | X       | X   | X      | X    | X     | X   |
| Rotavirus vaccine                                  | X       |     | X      |      | X     | X   |
| Rubella vaccine                                    |         | X   |        |      |       |     |
| TT                                                 |         |     | X      |      |       |     |
| Varicella vaccine                                  | X       | X   | X      | X    | X     |     |
| <b>Non-Communicable Diseases</b>                   |         |     |        |      |       |     |
| <b>Breast Cancer</b>                               |         |     |        |      |       |     |
| Basic breast cancer awareness                      | X       | X   | X      | X    | X     | X   |
| Diagnosis after screened with clinical breast exam |         |     | X      | X    |       | X   |
| Diagnosis after screened with mammography          |         |     |        |      |       | X   |
| Diagnosis without screening for breast cancer      |         |     |        |      |       | X   |
| Diagnosis: screened with clinical breast exam      |         | X   |        |      |       |     |

|                                                                                              |                |            |               |             |              |            |
|----------------------------------------------------------------------------------------------|----------------|------------|---------------|-------------|--------------|------------|
| Diagnosis: screened with mammogram                                                           |                | X          |               |             |              |            |
| Post-treatment surveillance for breast cancer patients                                       |                | X          |               |             |              |            |
| Screening: clinical breast examination                                                       | X              | X          | X             | X           | X            | X          |
| <b>Service</b>                                                                               | <b>Bahrain</b> | <b>KSA</b> | <b>Kuwait</b> | <b>Oman</b> | <b>Qatar</b> | <b>UAE</b> |
| Screening: mammography                                                                       |                | X          |               |             |              | X          |
| <b>Cervical Cancer</b>                                                                       |                |            |               |             |              |            |
| HPV DNA + VIA                                                                                |                |            |               |             |              | X          |
| Papanicolaou test (pap smear)                                                                | X              | X          | X             | X           | X            | X          |
| Post-treatment surveillance for cervical cancer                                              |                | X          |               |             |              |            |
| Visual inspection with acetic acid (VIA)                                                     |                |            |               |             |              | X          |
| <b>Colorectal Cancer</b>                                                                     |                |            |               |             |              |            |
| Diagnosis for colorectal cancer screened with FIT                                            |                |            |               |             |              | X          |
| Diagnosis for colorectal cancer screened with FOBT                                           |                | X          |               |             |              | X          |
| Diagnosis without screening for colorectal cancer (symptom based)                            |                | X          |               |             |              | X          |
| Post-treatment surveillance for colorectal cancer                                            |                | X          |               |             |              |            |
| Screening: colonoscopy                                                                       |                | X          |               |             |              |            |
| Screening: faecal immunochemical test                                                        |                |            |               |             |              | X          |
| Screening: faecal occult blood testing                                                       | X              | X          | X             | X           | X            | X          |
| Screening: sigmoidoscopy                                                                     |                | X          |               |             |              |            |
| <b>CVD &amp; Diabetes</b>                                                                    |                |            |               |             |              |            |
| Follow-up care for those at low risk of CVD/Diabetes (absolute Risk: 10-20%)                 | X              | X          | X             | X           | X            | X          |
| Intensive glycaemic control                                                                  | X              | X          | X             | X           | X            | X          |
| Neuropathy screening and preventive foot care                                                | X              | X          | X             | X           | X            | X          |
| Referral for retinopathy screening                                                           |                |            |               | X           |              |            |
| Retinopathy screening                                                                        | X              |            | X             |             | X            | X          |
| Screening for risk of CVD/Diabetes                                                           | X              | X          | X             | X           | X            | X          |
| Standard glycaemic control                                                                   | X              | X          | X             | X           | X            | X          |
| Treatment for those with absolute risk of CVD/Diabetes 20-30%                                | X              | X          | X             | X           | X            | X          |
| Treatment for those with established cerebrovascular disease and post stroke                 | X              | X          | X             | X           | X            | X          |
| Treatment for those with high absolute risk of CVD/Diabetes (>30%)                           | X              | X          | X             | X           | X            | X          |
| Treatment for those with high blood pressure but low absolute risk of CVD/Diabetes (< 20%)   | X              | X          | X             | X           | X            | X          |
| Treatment for those with very high cholesterol but low absolute risk of CVD/Diabetes (< 20%) | X              | X          | X             | X           | X            | X          |
| Treatment of cases with established ischaemic heart disease (IHD)                            | X              | X          | X             | X           | X            | X          |
| Treatment of cases with rheumatic heart disease (with benzathine penicillin)                 | X              | X          |               |             | X            | X          |
| Treatment of new cases of acute myocardial infarction (AMI) with aspirin                     | X              | X          | X             | X           | X            | X          |
| <b>Emergency care</b>                                                                        |                |            |               |             |              |            |
| Average annual emergency care needs                                                          | X              | X          | X             | X           | X            | X          |
| <b>Oral Care</b>                                                                             |                |            |               |             |              |            |

|                                                                                 |                |            |               |             |              |            |
|---------------------------------------------------------------------------------|----------------|------------|---------------|-------------|--------------|------------|
| Dental cleaning and preventive care                                             | X              | X          | X             | X           | X            |            |
| Oral and dental care                                                            |                |            |               |             |              | X          |
| <b>Respiratory Diseases</b>                                                     |                |            |               |             |              |            |
| <b>Service</b>                                                                  | <b>Bahrain</b> | <b>KSA</b> | <b>Kuwait</b> | <b>Oman</b> | <b>Qatar</b> | <b>UAE</b> |
| Asthma: high dose inhaled beclomethasone + SABA                                 | X              |            | X             |             | X            | X          |
| Asthma: high dose inhaled fluticasone + SABA                                    |                | X          |               | X           |              |            |
| Asthma: inhaled short acting beta agonist for intermittent asthma               | X              | X          | X             | X           | X            | X          |
| Asthma: low dose inhaled beclomethasone + SABA                                  | X              |            | X             |             | X            | X          |
| Asthma: low dose inhaled fluticasone + SABA                                     |                | X          |               | X           |              |            |
| Asthma: oral prednisolone + theophylline + high dose inhaled fluticasone + SABA |                | X          |               | X           |              |            |
| Asthma: theophylline + high dose inhaled fluticasone + SABA                     |                | X          |               | X           |              |            |
| COPD: exacerbation treatment with antibiotics                                   | X              | X          | X             | X           | X            | X          |
| COPD: exacerbation treatment with oral prednisolone                             | X              | X          | X             | X           | X            | X          |
| COPD: exacerbation treatment with oxygen                                        |                | X          |               | X           |              | X          |
| COPD: inhaled salbutamol                                                        | X              | X          | X             | X           | X            | X          |
| COPD: ipratropium inhaler                                                       | X              | X          | X             | X           | X            | X          |
| COPD: low-dose oral theophylline                                                | X              | X          | X             | X           | X            |            |
| COPD: smoking cessation                                                         | X              | X          | X             | X           | X            | X          |
| <b>Child Health</b>                                                             |                |            |               |             |              |            |
| <b>Deworming</b>                                                                |                |            |               |             |              |            |
| Deworming                                                                       | X              |            | X             | X           | X            |            |
| <b>Diarrhea management</b>                                                      |                |            |               |             |              |            |
| Antibiotics for treatment of dysentery                                          |                | X          |               | X           |              | X          |
| ORS                                                                             | X              | X          | X             | X           | X            | X          |
| Treatment of severe diarrhea                                                    |                | X          |               |             |              |            |
| Zinc (diarrhea treatment)                                                       |                | X          |               | X           |              |            |
| <b>General</b>                                                                  |                |            |               |             |              |            |
| Zinc supplementation                                                            |                | X          |               | X           |              |            |
| Child general health                                                            | X              | X          | X             | X           | X            | X          |
| School health                                                                   | X              |            |               |             | X            |            |
| <b>Malaria</b>                                                                  |                |            |               |             |              |            |
| Malaria treatment (0-4, mild cases)                                             |                |            |               | X           |              |            |
| <b>Pneumonia</b>                                                                |                |            |               |             |              |            |
| Pneumonia treatment (children)                                                  | X              | X          | X             | X           | X            | X          |
| Treatment of severe pneumonia                                                   |                | X          |               |             |              |            |
| <b>Routine Child Health Care Visit</b>                                          |                |            |               |             |              |            |
| Routine child health care visit (< 1 year)                                      |                |            |               |             |              | X          |
| Routine child health care visit (1-5 years)                                     |                |            |               |             |              | X          |
| <b>School Health Program</b>                                                    |                |            |               |             |              |            |

|                                                                                               |                |            |               |             |              |            |
|-----------------------------------------------------------------------------------------------|----------------|------------|---------------|-------------|--------------|------------|
| Dental screening                                                                              |                |            |               | X           |              |            |
| Ear screening                                                                                 |                |            |               | X           |              |            |
| Eye screening                                                                                 |                |            |               | X           |              |            |
| <b>Service</b>                                                                                | <b>Bahrain</b> | <b>KSA</b> | <b>Kuwait</b> | <b>Oman</b> | <b>Qatar</b> | <b>UAE</b> |
| <b>Nutrition</b>                                                                              |                |            |               |             |              |            |
| <b>Adults</b>                                                                                 |                |            |               |             |              |            |
| Care for adults with food allergies and sensitivities                                         |                |            |               |             |              | X          |
| Care for adults with hyperuricemia                                                            |                |            |               |             |              | X          |
| Care for adults with kidney diseases                                                          |                |            |               |             |              | X          |
| Care for adults with low BMI                                                                  | X              | X          | X             | X           | X            |            |
| Care for adults with nutritional anaemia                                                      |                |            |               |             |              | X          |
| <b>Care for adults with other nutritional diseases</b>                                        |                |            |               |             |              |            |
| Care for diabetic adults                                                                      |                |            |               |             |              | X          |
| Care for obese adults                                                                         |                |            |               |             |              | X          |
| <b>All populations</b>                                                                        |                |            |               |             |              |            |
| Food fortification                                                                            |                |            |               |             |              | X          |
| <b>Children</b>                                                                               |                |            |               |             |              |            |
| Breastfeeding counselling and support                                                         | X              | X          | X             | X           | X            |            |
| Complementary feeding counselling and support                                                 | X              | X          | X             | X           |              |            |
| <b>Feeding counselling and support for infants and young children in emergency situations</b> |                |            |               |             |              |            |
| Intermittent iron supplementation in children                                                 | X              |            | X             | X           | X            |            |
| Management of food allergies or food intolerances                                             |                |            |               |             |              | X          |
| Management of moderate acute malnutrition                                                     |                |            |               |             |              | X          |
| Management of moderate acute malnutrition (children)                                          |                | X          |               | X           |              |            |
| Management of severe malnutrition                                                             |                |            |               |             |              | X          |
| <b>Pregnant and lactating women</b>                                                           |                |            |               |             |              |            |
| Calcium supplementation for prevention and treatment of pre-eclampsia and eclampsia           |                |            |               | X           |              |            |
| Daily FAF, postpartum, anaemic women                                                          |                |            |               | X           |              |            |
| Daily iron and folic acid supplementation (pregnant women)                                    | X              | X          | X             | X           | X            |            |
| Intermittent FAF, postpartum, non-anaemic pregnant women                                      |                |            |               | X           |              |            |
| Intermittent iron and folic acid supplementation (non-anaemic pregnant women)                 | X              | X          | X             | X           | X            |            |
| Iodine supplementation in pregnant women                                                      |                | X          |               |             |              |            |
| Vitamin A supplementation in pregnant women                                                   |                | X          |               |             |              |            |
| <b>Women of reproductive age and adolescent girls</b>                                         |                |            |               |             |              |            |
| Intermittent iron-folic acid supplementation                                                  | X              | X          | X             | X           | X            |            |
| <b>Mental Health</b>                                                                          |                |            |               |             |              |            |
| <b>Alcohol use/ dependence</b>                                                                |                |            |               |             |              |            |
| Identification and assessment of new cases of alcohol use/dependence                          |                |            |               | X           |              | X          |



|                                                                                                                           |                |            |               |             |              |            |
|---------------------------------------------------------------------------------------------------------------------------|----------------|------------|---------------|-------------|--------------|------------|
| Brief interventions and follow-up for alcohol use/dependence                                                              |                | X          |               | X           |              |            |
| Identification and assessment of new cases of alcohol use/dependence                                                      |                | X          |               |             |              |            |
| <b>Anxiety Disorders</b>                                                                                                  |                |            |               |             |              |            |
| <b>Service</b>                                                                                                            | <b>Bahrain</b> | <b>KSA</b> | <b>Kuwait</b> | <b>Oman</b> | <b>Qatar</b> | <b>UAE</b> |
| Basic psychological treatment for anxiety disorders (mild cases).                                                         | X              |            | X             | X           | X            | X          |
| Basic psychosocial treatment and anti-depressant medication for anxiety disorders (mild-moderate cases)                   | X              | X          | X             |             | X            | X          |
| Basic psychosocial treatment for anxiety disorders (mild cases)                                                           |                | X          |               |             |              |            |
| <b>Attention Disorders</b>                                                                                                |                |            |               |             |              |            |
| Methylphenidate medication                                                                                                |                |            |               |             |              | X          |
| <b>Bipolar Disorders</b>                                                                                                  |                |            |               |             |              |            |
| Basic psychosocial treatment, advice, and follow-up for bipolar disorder, plus mood-stabilizing medication                |                | X          |               |             |              | X          |
| <b>Conduct Disorders</b>                                                                                                  |                |            |               |             |              |            |
| Basic psychosocial treatment, advice, and follow-up for behavioural disorders                                             |                | X          |               |             |              | X          |
| <b>Dementia</b>                                                                                                           |                |            |               |             |              |            |
| Assessment, diagnosis, advice, and follow-up for dementia                                                                 |                | X          |               |             |              | X          |
| Dementia screening, basic work up and referral to tertiary care                                                           |                |            |               | X           |              |            |
| Pharmacological treatment of dementia                                                                                     |                |            |               |             |              | X          |
| <b>Depression</b>                                                                                                         |                |            |               |             |              |            |
| Basic psychosocial treatment and anti-depressant medication of first episode (mild to moderate cases)                     |                |            |               | X           |              |            |
| Basic psychosocial treatment and anti-depressant medication of first episode (moderate-severe cases)                      | X              | X          | X             |             | X            | X          |
| Basic psychosocial treatment for mild depression                                                                          | X              | X          | X             | X           | X            | X          |
| Intensive psychosocial treatment and anti-depressant medication of recurrent moderate-severe cases on a maintenance basis |                |            |               |             |              | X          |
| Psychosocial care for perinatal depression                                                                                |                |            |               |             |              | X          |
| Psychosocial care for perinatal depression for mild cases only                                                            |                |            |               | X           |              |            |
| <b>Developmental Disorders</b>                                                                                            |                |            |               |             |              |            |
| Basic psychosocial treatment, advice, and follow-up for developmental disorders                                           |                | X          |               |             |              | X          |
| <b>Drug use/dependence</b>                                                                                                |                |            |               |             |              |            |
| Brief interventions and follow-up for drug use/dependence                                                                 |                | X          |               | X           |              | X          |
| Identification and assessment of new cases of drug use/dependence                                                         |                | X          |               | X           |              |            |
| <b>Epilepsy</b>                                                                                                           |                |            |               |             |              |            |
| Basic psychosocial support, advice, and follow-up only                                                                    |                |            |               | X           |              |            |
| Basic psychosocial support, advice, and follow-up, plus anti-epileptic medication                                         |                | X          |               |             |              | X          |
| <b>Psychosis</b>                                                                                                          |                |            |               |             |              |            |
| Basic psychosocial support and anti-psychotic medication                                                                  |                | X          |               | X           |              | X          |
| <b>Self-harm/suicide</b>                                                                                                  |                |            |               |             |              |            |
| Assess and care for person with self-harm                                                                                 |                | X          |               | X           |              |            |

|                                                                           |                |            |               |             |              |            |
|---------------------------------------------------------------------------|----------------|------------|---------------|-------------|--------------|------------|
| Basic psychosocial treatment, advice, and follow-up for self-harm/suicide |                |            |               | X           |              |            |
| Pesticide intoxication management                                         |                |            |               | X           |              |            |
| <b>Maternal Newborn and Reproductive Health</b>                           |                |            |               |             |              |            |
| <b>Antenatal Care (ANC)</b>                                               |                |            |               |             |              |            |
| <b>Service</b>                                                            | <b>Bahrain</b> | <b>KSA</b> | <b>Kuwait</b> | <b>Oman</b> | <b>Qatar</b> | <b>UAE</b> |
| Antenatal Care (ANC)                                                      |                |            |               |             |              | X          |
| <b>Childbirth care - Facility births</b>                                  |                |            |               |             |              |            |
| Feeding counselling and support for low-birth-weight infants              |                |            |               | X           |              |            |
| Kangaroo mother care                                                      |                |            |               | X           |              |            |
| Labour and delivery management                                            |                |            |               | X           |              |            |
| Manual removal of placenta                                                |                |            |               | X           |              |            |
| MgSO4 for eclampsia                                                       |                |            |               | X           |              |            |
| Neonatal resuscitation                                                    |                |            |               | X           |              |            |
| Parenteral administration of uterotonics                                  |                |            |               | X           |              |            |
| Pre-referral management of labour complications                           |                | X          |               | X           |              |            |
| Treatment of local infections (newborn)                                   |                |            |               | X           |              |            |
| <b>Family planning</b>                                                    |                |            |               |             |              |            |
| Condom - male                                                             |                |            |               | X           |              |            |
| Contraception management                                                  |                |            |               |             | X            |            |
| Implant - Implanon (3 years)                                              |                |            |               | X           |              |            |
| Injectable - 3 month (depo provera)                                       | X              |            | X             | X           |              |            |
| IUCD follow-up care                                                       | X              |            | X             |             | X            |            |
| IUD - Copper-T 380-A IUD (10 years)                                       |                | X          |               | X           |              |            |
| Lactational amenorrhea method                                             |                |            |               | X           |              |            |
| Other contraceptives                                                      | X              |            | X             |             |              |            |
| Periodic abstinence                                                       |                |            |               | X           |              |            |
| Pill - progestin only                                                     | X              |            | X             | X           |              |            |
| Pill - standard daily regimen                                             |                | X          |               |             |              |            |
| Standard days method                                                      |                |            |               | X           |              |            |
| Withdrawal                                                                |                | X          |               | X           |              |            |
| Post-abortion case management                                             |                |            | X             |             | X            |            |
| <b>Management of ectopic pregnancy care</b>                               |                |            |               |             |              |            |
| Ectopic case management                                                   |                |            |               | X           |              |            |
| <b>Menopause Program</b>                                                  |                |            |               |             |              |            |
| Screen for mood disorders                                                 |                |            |               | X           |              |            |
| Screen for urogenital dryness                                             |                |            |               | X           |              |            |
| <b>Other</b>                                                              |                |            |               |             |              |            |
| Postmenopausal care                                                       |                |            | X             |             |              |            |
| Management of abnormal uterine bleeding                                   |                |            | X             |             |              |            |

|                                                                   |                |            |               |             |              |            |
|-------------------------------------------------------------------|----------------|------------|---------------|-------------|--------------|------------|
| Management of amenorrhoea                                         |                |            | X             |             |              |            |
| Management of hirsutism                                           |                |            | X             |             |              |            |
| Management of irregular cycles                                    |                |            | X             |             |              |            |
| Management of mild endometriosis                                  |                |            | X             |             |              |            |
| <b>Service</b>                                                    | <b>Bahrain</b> | <b>KSA</b> | <b>Kuwait</b> | <b>Oman</b> | <b>Qatar</b> | <b>UAE</b> |
| Management of PCO                                                 |                |            | X             |             |              |            |
| Management of pre pubertal problems (delayed menarche, infection) |                |            | X             |             |              |            |
| <b>Other sexual and reproductive health</b>                       |                |            |               |             |              |            |
| Cervical cancer screening                                         |                | X          | X             |             |              |            |
| Identification and management of infertility                      | X              | X          | X             | X           | X            |            |
| Treatment of chlamydia                                            | X              | X          | X             | X           | X            |            |
| Treatment of gonorrhoea                                           | X              | X          | X             | X           | X            |            |
| Treatment of pelvic inflammatory disease                          | X              | X          | X             | X           | X            |            |
| Treatment of syphilis                                             | X              | X          | X             | X           | X            |            |
| Treatment of trichomoniasis                                       | X              | X          | X             | X           | X            |            |
| Treatment of urinary tract infection                              | X              | X          | X             | X           | X            |            |
| <b>Postpartum Care</b>                                            |                |            |               |             |              |            |
| Breast feeding education and advice                               | X              |            | X             |             | X            |            |
| Mastitis                                                          | X              |            | X             | X           |              |            |
| Postnatal care                                                    |                |            |               |             |              | X          |
| Postpartum care examination                                       |                |            |               |             | X            |            |
| Treatment of postpartum haemorrhage                               | X              | X          | X             | X           | X            |            |
| Maternal sepsis case management                                   |                |            |               | X           |              |            |
| <b>Preconception Care (PCC)</b>                                   |                |            |               |             |              |            |
| Preconception care                                                |                |            |               |             |              | X          |
| <b>Pregnancy Care</b>                                             |                |            |               |             |              |            |
| Basic ANC                                                         | X              | X          | X             | X           | X            |            |
| Syphilis detection and treatment (pregnant women)                 | X              |            | X             |             | X            |            |
| Tetanus toxoid (pregnant women)                                   | X              | X          | X             | X           | X            |            |
| Syphilis screening (pregnant women)                               |                |            |               | X           |              |            |
| <b>Pregnancy care - Treatment of pregnancy complications</b>      |                |            |               |             |              |            |
| Deworming (pregnant women)                                        | X              |            | X             | X           |              |            |
| Hypertensive disorder case management                             |                | X          |               | X           |              |            |
| Management of other pregnancy complications                       |                |            |               | X           |              |            |
| Management of pre-eclampsia (magnesium sulphate)                  |                |            |               | X           |              |            |
| <b>Premarital screening program</b>                               |                |            |               |             |              |            |
| Premarital screening program                                      |                |            |               |             |              | X          |
| <b>General Practice</b>                                           |                |            |               |             |              |            |
| General practice                                                  | X              | X          | X             | X           | X            | X          |

**Table S2. Assumptions used to estimate the population in need, drugs and supplies costs, and labour costs (all countries)**

| Service                                                                   | Population in Need                                                                                     | Drugs and Supply Costs                                   | Labour Costs                                      |
|---------------------------------------------------------------------------|--------------------------------------------------------------------------------------------------------|----------------------------------------------------------|---------------------------------------------------|
| Varicella vaccine                                                         | Children 1 and 5 years old, for the first and the second dose                                          | USD 17.5 for one dose (WHO Review of vaccine price data) | Nurse (4 min) and GP (4 min) for one dose         |
| Influenza vaccine                                                         | Children 0-5 + Pregnant women + People 65+                                                             | USD 2.39 for one dose (WHO Review of vaccine price data) | Nurse (4 min) and GP (4 min) for one dose         |
| Retinopathy screening                                                     | People with diabetes should be screened every year (100%)                                              | -                                                        | -                                                 |
| Neuropathy screening                                                      | People with diabetes should be screened every year (100%)                                              | -                                                        | -                                                 |
| Clinical breast examination                                               | Women aged 40-70 should be screened every 2 years (50%)                                                | -                                                        | -                                                 |
| Diagnosis after screened with clinical breast examination                 | Based on country breast cancer incidence rate (WHO – IARC 2020)                                        | -                                                        | -                                                 |
| Pap smear                                                                 | Women 30-49 should be screened every 3 years (33%)                                                     | -                                                        | -                                                 |
| Faecal occult blood screening                                             | People 50+ should be screened every 10 years (10%)                                                     | -                                                        | -                                                 |
| Dental cleaning and preventive care                                       | All population                                                                                         | No costs estimated                                       | Nurse (20 min) and Dentist (15 min) for one visit |
| General child health                                                      | Children 0-14                                                                                          | Cost per outpatient visit (WHO-CHOICE) – Labour costs    | GP (15 min) for one visit                         |
| Pneumonia treatment                                                       | -                                                                                                      | -                                                        | Nurse (20 min) + GP (20 min) for one visit        |
| Daily iron and folic acid supplementation (anaemic pregnant women)        | 100% of anaemic pregnant women (World Bank)                                                            | -                                                        | -                                                 |
| Intermittent iron folic acid supplementation (non-anaemic pregnant women) | 100% of non-anaemic pregnant women (World Bank)                                                        | -                                                        | -                                                 |
| Daily FAF, postpartum, non-anaemic women                                  | Based on number of live births (Annual Health Statistics) and percentage of anaemic women (World Bank) |                                                          |                                                   |

|                                              |                                                                                                                                                          |                                                       |                                                       |
|----------------------------------------------|----------------------------------------------------------------------------------------------------------------------------------------------------------|-------------------------------------------------------|-------------------------------------------------------|
| Intermittent FAF, postpartum, anaemic women  | Based on number of live births (Annual Health Statistics) and percentage of non-anaemic women (World Bank)                                               |                                                       |                                                       |
| Care for adults with low BMI                 | 100% of underweight adults (Global Nutrition Report)                                                                                                     | -                                                     | -                                                     |
| All mental health clinical services          | Based on prevalence rates (Zuberi et al. 2021, GBD 2016 Epilepsy Collaborators, GBD 2016 Dementia Collaborators, WHO-EMRO, Atlas of Substance Disorder). | -                                                     | -                                                     |
| Treatment of postpartum haemorrhage (PPH)    | Based on incidence rates of PPH                                                                                                                          | -                                                     | -                                                     |
| Identification and management of infertility | Based on regional prevalence (Eldib 2018) among adults 15-49 (3.8%)                                                                                      | -                                                     | -                                                     |
| Treatment of syphilis                        | Based on regional incidence rates (Kenyon et al. 2014) among adults 15-49 (2.2%)                                                                         | -                                                     | -                                                     |
| Treatment of gonorrhoea                      | Based on regional incidence rates (Kenyon et al. 2014) among adults 15-49 (0.9%)                                                                         | -                                                     | -                                                     |
| Treatment of chlamydia                       | Based on regional incidence rates (Kenyon et al. 2014) among adults 15-49 (1.9%)                                                                         | -                                                     | -                                                     |
| Treatment of trichomoniasis                  | Based on regional incidence rates (Kenyon et al. 2014) among adults 15-49 (2.8%)                                                                         | -                                                     | -                                                     |
| Treatment of pelvic inflammatory infection   | Based on US incidence rate (Kresiel 2021) among adults 15-49 (3.6%)                                                                                      | -                                                     | -                                                     |
| General practice                             | All population                                                                                                                                           | Cost per outpatient visit (WHO-CHOICE) – Labour costs | GP (15 min) for one visit                             |
| All Services                                 | -                                                                                                                                                        | -                                                     | Community health workers time was allocated to nurses |

**Table S2-A. Country-specific assumptions (Oman)**

| Service                                  | Population in Need               | Drugs and Supply Costs | Labour Costs                 |
|------------------------------------------|----------------------------------|------------------------|------------------------------|
| School health program (eye screening)    | Children in grade 1, 4, 7 and 10 | No costs estimated     | Nurse (10 min) for one visit |
| School health program (dental screening) | Children in grade 1              | No costs estimated     | Nurse (10 min) for one visit |

|                                                                             |                           |                    |                              |
|-----------------------------------------------------------------------------|---------------------------|--------------------|------------------------------|
| School health program ( ear screening)                                      | Children in grade 1 and 2 | No costs estimated | Nurse (10 min) for one visit |
| Menopause program: screen for urogenital dryness, screen for mood disorders | Women 45-55 (100%)        | No costs estimated | GP (15 min) for one visit    |
| Elderly and community care program                                          | People 60+                | No costs estimated | Nurse (45 min) for one visit |

**Table S2-B. Country-specific assumptions (Bahrain)**

| Service       | Population in Need | Drugs and Supply Costs | Labour Costs                 |
|---------------|--------------------|------------------------|------------------------------|
| School health | Children 5-19      | No costs estimated     | Nurse (10 min) for one visit |

**Table S2-C. Country-specific assumptions (Kuwait)**

| Service                                                                                                                                      | Population in Need                                                            | Drugs and Supply Costs                      | Labour Costs                              |
|----------------------------------------------------------------------------------------------------------------------------------------------|-------------------------------------------------------------------------------|---------------------------------------------|-------------------------------------------|
| Meningococcal vaccine                                                                                                                        | PIN was not estimated since the number of visits was directly provided by MOH | USD 10.6 (WHO Review of vaccine price data) | Nurse (4 min) and GP (4 min) for one dose |
| DT adult vaccine                                                                                                                             | PIN was not estimated since the number of visits was directly provided by MOH | USD 1.8 (WHO Review of vaccine price data)  | Nurse (4 min) and GP (4 min) for one dose |
| DT pediatrics vaccine                                                                                                                        | PIN was not estimated since the number of visits was directly provided by MOH | USD 1.8 (WHO Review of vaccine price data)  | Nurse (4 min) and GP (4 min) for one dose |
| Anti-rabies vaccine                                                                                                                          | PIN was not estimated since the number of visits was directly provided by MOH | USD 48.6 (WHO Review of vaccine price data) | Nurse (4 min) and GP (4 min) for one dose |
| Hep B vaccine (paediatrics)                                                                                                                  | PIN was not estimated since the number of visits was directly provided by MOH | USD 3.24 (WHO Review of vaccine price data) | Nurse (4 min) and GP (4 min) for one dose |
| TT vaccine                                                                                                                                   | PIN was not estimated since the number of visits was directly provided by MOH | USD 0.58 (WHO Review of vaccine price data) | Nurse (4 min) and GP (4 min) for one dose |
| Management of pre-pubertal problems                                                                                                          | PIN was not estimated since the number of visits was directly provided by MOH | No costs estimated                          | Obs/Gyn (15 min) for one visit            |
| Management of PCO, hirsutism, irregular cycles, amenorrhea, abnormal uterine bleeding, management of mild endometriosis, postmenopausal care | PIN was not estimated since the number of visits was directly provided by MOH | No costs estimated                          | Obs/Gyn (15 min) for one visit            |

**Table S2-D. Country-specific assumptions (Qatar)**

| Service                     | Population in Need                                                            | Drugs and Supply Costs                                | Labour Costs                                   |
|-----------------------------|-------------------------------------------------------------------------------|-------------------------------------------------------|------------------------------------------------|
| Child General Health        | Children 0-14                                                                 | Cost per outpatient visit (WHO-CHOICE) – Labour costs | GP (15 min) for one visit                      |
| School health               | PIN was not estimated since the number of visits was directly provided by MOH | No costs estimated                                    | Nurse (10 min) for one visit                   |
| Postpartum care examination | PIN was not estimated since the number of visits was directly provided by MOH | Cost per outpatient visit (WHO-CHOICE) – Labour costs | GP (10 min) and Midwife (20 min) for one visit |
| Allied health               | PIN was not estimated since the number of visits was directly provided by MOH | Cost per outpatient visit (WHO-CHOICE) – Labour costs | Nurse (20 min) for one visit                   |

**Table S2-E. Country-specific assumptions (UAE)**

| Service                                                   | Population in Need                                                  | Drugs and Supply Costs                                    | Labour Costs                |
|-----------------------------------------------------------|---------------------------------------------------------------------|-----------------------------------------------------------|-----------------------------|
| <b>Screening: mammography</b>                             | Women aged 40-70 should be screened every 2 years (50%)             | -                                                         | -                           |
| <b>Diagnosis for breast cancer</b>                        | Based on country breast cancer incidence rate (WHO – IARC 2020)     | -                                                         | -                           |
| <b>Visual inspection with acetic acid, HPV DNA + VIA.</b> | Based on country cervix cancer incidence rate (WHO – IARC 2020)     | -                                                         | -                           |
| <b>Screening; faecal immunochemical test</b>              | Based on country colorectal cancer incidence rate (WHO – IARC 2020) | -                                                         | -                           |
| <b>Diagnosis for colorectal cancer</b>                    | Based on country colorectal cancer incidence rate (WHO – IARC 2020) | -                                                         | -                           |
| <b>Routine child healthcare visit (1 year)</b>            | Children 0-12 months (100%)                                         | Estimate based on OHT drugs and supplies prices: USD 19.7 | Nurse (20 min), GP (10 min) |
| <b>Routine child healthcare visit (1-5 years)</b>         | Children 12-59 months (100%)                                        | Estimate based on OHT drugs and supplies prices: USD 2.8  | Nurse (20 min), GP (10 min) |
| <b>Nutrition: Care for obese adults</b>                   | People with obesity (Global Nutrition Report)                       | No costs estimated                                        | GP (10 min)                 |
| <b>Nutrition: Care for diabetic adults</b>                | People with diabetes (OHT)                                          | No costs estimated                                        | GP (10 min)                 |

|                                                                         |                                                                          |                                                            |                                                      |
|-------------------------------------------------------------------------|--------------------------------------------------------------------------|------------------------------------------------------------|------------------------------------------------------|
| <b>Nutrition: Care for adults with kidney diseases</b>                  | Adults with chronic kidney disease (Al-Shamsi et al. 2018)               | No costs estimated                                         | GP (10 min)                                          |
| <b>Nutrition: Care for adults with nutritional anaemia</b>              | Adults with anaemia (Global Nutrition Report)                            | No costs estimated                                         | GP (10 min)                                          |
| <b>Nutrition: Care for adults with food allergies and sensitivities</b> | People with nutrition-related allergies (Althumiri et al. 2021)          | No costs estimated                                         | GP (10 min), Specialist Doctor (30 min)              |
| <b>Management of food allergies and food intolerance</b>                | Children 0-14 x Global Prevalence of Allergies (3.0%)                    | No costs estimated                                         | GP (10 min), Specialist Doctor (30 min)              |
| <b>Preconception care</b>                                               | Married women or planning for marriage at reproductive age (15-49 years) | Estimate based on OHT drugs and supplies prices: USD 4.90  | Nurse (15 min), GP (15 min)                          |
| <b>Antenatal care</b>                                                   | Pregnant women                                                           | Estimate based on OHT drugs and supplies prices: USD 36.42 | GP (40 min), Radiographer (20 min), Midwife (40 min) |
| <b>Postnatal care</b>                                                   | Women who gave birth                                                     | No costs estimated                                         | Nurse (15 min), GP (15 min)                          |
| <b>Premarital screening program</b>                                     | Women (15-49) planning for a marriage                                    | Estimate based on OHT drugs and supplies prices: USD 15.66 | Nurse (15 min), GP (15 min)                          |

**Table S2-F. Country-specific assumptions (KSA)**

| Service                                                       | Population in Need                                                  | Drugs and Supply Costs | Labour Costs |
|---------------------------------------------------------------|---------------------------------------------------------------------|------------------------|--------------|
| <b>Screening: mammography</b>                                 | Women aged 40-70 should be screened every 2 years (50%)             | -                      | -            |
| <b>Post-treatment surveillance for breast cancer patients</b> | Based on country breast cancer incidence rate (WHO – IARC 2020)     | -                      | -            |
| <b>Post treatment surveillance for cervical cancer</b>        | Based on country cervix cancer incidence rate (WHO – IARC 2020)     | -                      | -            |
| <b>Screening: Sigmoidoscopy, colonoscopy</b>                  | People 50+ should be screened every 10 years (10%)                  | -                      | -            |
| <b>Post treatment surveillance for colorectal cancer</b>      | Based on country colorectal cancer incidence rate (WHO – IARC 2020) | -                      | -            |



**Table S3. References and assumptions used to estimate the total number of services delivered in 2019 in Oman**

| Immunization                                                                                 | Reference / Assumption                                                      |
|----------------------------------------------------------------------------------------------|-----------------------------------------------------------------------------|
| Measles vaccine                                                                              | MOH Health Statistics 2019 <sup>1</sup>                                     |
| Pentavalent vaccine                                                                          |                                                                             |
| Varicella vaccine                                                                            |                                                                             |
| DPT vaccination                                                                              |                                                                             |
| Polio vaccine                                                                                |                                                                             |
| BCG vaccine                                                                                  |                                                                             |
| Pneumococcal vaccine                                                                         |                                                                             |
| <b>Non-Communicable Diseases</b>                                                             |                                                                             |
| CVD & Diabetes                                                                               |                                                                             |
| Screening for risk of CVD/Diabetes                                                           | Assumption: 5.0%                                                            |
| Follow-up care for those at low risk of CVD/Diabetes (Absolute Risk: 10-20%)                 | Assumption: 5.0%                                                            |
| Treatment for those with very high cholesterol but low absolute risk of CVD/Diabetes (< 20%) | Assumption derived from UHC Service Coverage Sub-Index on NCDs <sup>2</sup> |
| Treatment for those with high blood pressure but low absolute risk of CVD/Diabetes (< 20%)   |                                                                             |
| Treatment for those with absolute risk of CVD/Diabetes 20-30%                                |                                                                             |
| Treatment for those with high absolute risk of CVD/Diabetes (>30%)                           |                                                                             |
| Treatment of new cases of acute myocardial infarction (AMI) with aspirin                     |                                                                             |
| Treatment of cases with established ischaemic heart disease (IHD)                            |                                                                             |
| Treatment for those with established cerebrovascular disease and post stroke                 | Estimate from MOH Health Statistics 2019 <sup>1</sup>                       |
| Standard glycaemic control                                                                   |                                                                             |
| Intensive glycaemic control                                                                  |                                                                             |
| Referral for retinopathy screening                                                           |                                                                             |
| Neuropathy screening and preventive foot care                                                |                                                                             |
| <b>Breast Cancer</b>                                                                         |                                                                             |
| Basic breast cancer awareness                                                                | Assumption: 5.0%                                                            |
| Screening: clinical breast examination (CBE)                                                 | MOH Health Statistics <sup>1</sup>                                          |
| Diagnosis after screened with clinical breast exam                                           | Assumption derived from WHO-IARC 2020 <sup>3</sup>                          |
| <b>Cervical Cancer</b>                                                                       |                                                                             |
| Papanicolaou test (pap smear)                                                                | Assumption derived from Bahrain CR                                          |
| <b>Colorectal Cancer</b>                                                                     |                                                                             |
| Screening: faecal occult blood testing                                                       | Assumption derived from 'CBE'                                               |
| <b>Elderly and community care program</b>                                                    |                                                                             |
| Elderly and community care program                                                           | MOH Health Statistics 2019 <sup>1</sup>                                     |
| <b>Respiratory Disease</b>                                                                   |                                                                             |

|    |                                                                                 |                                                                         |
|----|---------------------------------------------------------------------------------|-------------------------------------------------------------------------|
| 1  |                                                                                 |                                                                         |
| 2  |                                                                                 |                                                                         |
| 3  |                                                                                 |                                                                         |
| 4  | Asthma: Inhaled short acting beta agonist for intermittent asthma               |                                                                         |
| 5  | Asthma: Low dose inhaled fluticasone + SABA                                     |                                                                         |
| 6  | Asthma: High dose inhaled fluticasone + SABA                                    |                                                                         |
| 7  |                                                                                 |                                                                         |
| 8  | Asthma: Theophylline + High dose inhaled fluticasone + SABA                     |                                                                         |
| 9  |                                                                                 |                                                                         |
| 10 | Asthma: Oral Prednisolone + Theophylline + High dose inhaled fluticasone + SABA |                                                                         |
| 11 |                                                                                 |                                                                         |
| 12 | COPD: smoking cessation                                                         | MOH Health Statistics 2019 <sup>1</sup>                                 |
| 13 | COPD: inhaled salbutamol                                                        |                                                                         |
| 14 |                                                                                 |                                                                         |
| 15 | COPD: low-dose oral theophylline                                                |                                                                         |
| 16 | COPD: ipratropium inhaler                                                       |                                                                         |
| 17 |                                                                                 |                                                                         |
| 18 | COPD: Exacerbation treatment with antibiotics                                   |                                                                         |
| 19 |                                                                                 |                                                                         |
| 20 | COPD: Exacerbation treatment with oral prednisolone                             |                                                                         |
| 21 | COPD: Exacerbation treatment with oxygen                                        |                                                                         |
| 22 |                                                                                 |                                                                         |
| 23 | Emergency care                                                                  |                                                                         |
| 24 | Average annual emergency care needs                                             | N/A                                                                     |
| 25 |                                                                                 |                                                                         |
| 26 | Child Health                                                                    |                                                                         |
| 27 | General                                                                         |                                                                         |
| 28 |                                                                                 |                                                                         |
| 29 | Child general health                                                            | Assumption: 25% of GP visits (MOH Health Statistics 2019 <sup>1</sup> ) |
| 30 |                                                                                 |                                                                         |
| 31 | Deworming                                                                       | Assumption derived from UHC Service Coverage Index (WHO) <sup>2</sup>   |
| 32 | Zinc supplementation                                                            |                                                                         |
| 33 |                                                                                 |                                                                         |
| 34 | Diarrhea management                                                             |                                                                         |
| 35 | ORS                                                                             |                                                                         |
| 36 |                                                                                 |                                                                         |
| 37 | Zinc (diarrhea treatment)                                                       | Assumption derived from UHC Service Coverage Index (WHO) <sup>2</sup>   |
| 38 | Antibiotics for treatment of dysentery                                          |                                                                         |
| 39 |                                                                                 |                                                                         |
| 40 | Pneumonia                                                                       |                                                                         |
| 41 |                                                                                 |                                                                         |
| 42 | Pneumonia treatment (children, mild cases)                                      | Estimate from MOH Health Statistics 2019 <sup>1</sup>                   |
| 43 | Malaria                                                                         |                                                                         |
| 44 |                                                                                 |                                                                         |
| 45 | Malaria treatment (0-4, mild cases)                                             | Estimate from MOH Health Statistics 2019 <sup>1</sup>                   |
| 46 | School Health Program                                                           |                                                                         |
| 47 |                                                                                 |                                                                         |
| 48 | Eye screening                                                                   |                                                                         |
| 49 | Dental screening                                                                | MOH Health Statistics 2019 <sup>1</sup>                                 |
| 50 |                                                                                 |                                                                         |
| 51 | Ear screening                                                                   |                                                                         |
| 52 |                                                                                 |                                                                         |
| 53 | Nutrition                                                                       |                                                                         |
| 54 | Women of reproductive age and adolescent girls                                  |                                                                         |
| 55 |                                                                                 |                                                                         |
| 56 | Intermittent iron-folic acid supplementation                                    | Assumption: 5%                                                          |
| 57 | Pregnant and lactating women                                                    |                                                                         |
| 58 |                                                                                 |                                                                         |
| 59 | Daily iron and folic acid supplementation (pregnant women)                      | Estimate from MOH Health Statistics 2019 <sup>1</sup>                   |
| 60 |                                                                                 |                                                                         |

|                                                                                                            |                                                                       |
|------------------------------------------------------------------------------------------------------------|-----------------------------------------------------------------------|
| Intermittent iron and folic acid supplementation (non-anaemic pregnant women)                              |                                                                       |
| Calcium supplementation for prevention and treatment of pre-eclampsia and eclampsia                        |                                                                       |
| Daily FAF, postpartum, anaemic women                                                                       | Estimate from MOH Health Statistics 2019 <sup>1</sup>                 |
| Intermittent FAF, postpartum, non-anaemic pregnant women                                                   |                                                                       |
| Adults                                                                                                     |                                                                       |
| Care for adults with low BMI                                                                               | Assumption: 2.5%                                                      |
| Children                                                                                                   |                                                                       |
| Breastfeeding counselling and support                                                                      | MOH Health Statistics 2019 <sup>1</sup>                               |
| Complementary feeding counselling and support                                                              | Assumption derived from UHC Service Coverage Index (WHO) <sup>2</sup> |
| Intermittent iron supplementation in children                                                              |                                                                       |
| Management of moderate acute malnutrition (children)                                                       | MOH Health Statistics 2019 <sup>1</sup>                               |
| Mental Health                                                                                              |                                                                       |
| Anxiety Disorders                                                                                          |                                                                       |
| Basic psychological treatment for anxiety disorders (mild cases).                                          | Estimate from MOH Health Statistics 2019 <sup>1</sup>                 |
| Basic psychosocial treatment and anti-depressant medication for anxiety disorders (mild to moderate cases) |                                                                       |
| Depression                                                                                                 |                                                                       |
| Basic psychosocial treatment for mild depression                                                           | Estimate from MOH Health Statistics 2019 <sup>1</sup>                 |
| Basic psychosocial treatment and anti-depressant medication of first episode (mild to moderate cases)      |                                                                       |
| Psychosocial care for peri-natal depression for mild cases only                                            |                                                                       |
| Psychosis                                                                                                  |                                                                       |
| Basic psychosocial support and anti-psychotic medication                                                   | Estimate from MOH Health Statistics 2019 <sup>1</sup>                 |
| Epilepsy                                                                                                   |                                                                       |
| Basic psychosocial support, advice, and follow-up only                                                     | Estimate from MOH Health Statistics 2019 <sup>1</sup>                 |
| Dementia                                                                                                   |                                                                       |
| Dementia screening, basic work up and referral to tertiary care                                            | Estimate from MOH Health Statistics 2019 <sup>1</sup>                 |
| Alcohol use/ dependence                                                                                    |                                                                       |
| Identification and assessment of new cases of alcohol use/dependence                                       | Estimate from MOH Health Statistics 2019 <sup>1</sup>                 |
| Brief interventions and follow-up for alcohol use/dependence                                               |                                                                       |
| Drug use/dependence                                                                                        |                                                                       |
| Identification and assessment of new cases of drug use/dependence                                          | Estimate from MOH Health Statistics 2019 <sup>1</sup>                 |
| Brief interventions and follow-up for drug use/dependence                                                  |                                                                       |
| Self-harm/suicide                                                                                          |                                                                       |
| Assess and care for person with self-harm                                                                  | Estimate from MOH Health Statistics 2019 <sup>1</sup>                 |
| Basic psychosocial treatment, advice, and follow-up for self-harm/suicide                                  |                                                                       |
| Pesticide intoxication management                                                                          |                                                                       |
| Maternal Newborn and Reproductive Health                                                                   |                                                                       |

|    |                                                                                      |                                                                                   |
|----|--------------------------------------------------------------------------------------|-----------------------------------------------------------------------------------|
| 1  | Family planning                                                                      |                                                                                   |
| 2  | Pill - Progestin only                                                                | MOH Health Statistics 2019 <sup>1</sup>                                           |
| 3  | Condom - Male                                                                        |                                                                                   |
| 4  | Injectable - 3 month (Depo Provera)                                                  |                                                                                   |
| 5  | IUD - Copper-T 380-A IUD (10 years)                                                  |                                                                                   |
| 6  | Implant - Implanon (3 years)                                                         |                                                                                   |
| 7  | LAM (Lactational Amenorrhea Method)                                                  | MOH Health Statistics 2019 <sup>1</sup>                                           |
| 8  | SDM (Standard Days Method)                                                           |                                                                                   |
| 9  | Periodic abstinence                                                                  |                                                                                   |
| 10 | Withdrawal                                                                           |                                                                                   |
| 11 | Management of ectopic pregnancy care                                                 |                                                                                   |
| 12 | Ectopic case management                                                              | Assumption: 100%                                                                  |
| 13 | Pregnancy care - ANC                                                                 |                                                                                   |
| 14 | Tetanus toxoid (pregnant women)                                                      | Estimate from MOH Health Statistics 2019 <sup>1</sup>                             |
| 15 | Syphilis screening (pregnant women)                                                  | MOH Health Statistics 2019 <sup>1</sup>                                           |
| 16 | Basic ANC                                                                            |                                                                                   |
| 17 | Pregnancy care - Treatment of pregnancy complications                                |                                                                                   |
| 18 | Hypertensive disorder case management                                                | Assumption: 99%                                                                   |
| 19 | Management of pre-eclampsia (Magnesium sulphate)                                     |                                                                                   |
| 20 | Management of other pregnancy complications                                          |                                                                                   |
| 21 | Deworming (pregnant women), part of general care and not specific for pregnant women | Assumption derived from UHC Service Coverage Sub-Index on RMNH (WHO) <sup>2</sup> |
| 22 | Childbirth care - Facility births                                                    |                                                                                   |
| 23 | Parenteral administration of uterotonics                                             | Estimate from MOH Health Statistics 2019 <sup>1</sup>                             |
| 24 | Labour and delivery management                                                       |                                                                                   |
| 25 | Pre-referral management of labour complications                                      |                                                                                   |
| 26 | MgSO <sub>4</sub> for eclampsia                                                      |                                                                                   |
| 27 | Neonatal resuscitation                                                               |                                                                                   |
| 28 | Treatment of local infections (newborn)                                              |                                                                                   |
| 29 | Kangaroo mother care                                                                 |                                                                                   |
| 30 | Feeding counselling and support for low-birth-weight infants                         |                                                                                   |
| 31 | Manual removal of placenta                                                           |                                                                                   |
| 32 | Postpartum care - Treatment of sepsis                                                |                                                                                   |
| 33 | Maternal sepsis case management                                                      | Estimate from MOH Health Statistics 2019 <sup>1</sup>                             |
| 34 | Postpartum care - Other                                                              |                                                                                   |
| 35 | Mastitis                                                                             | Estimate from UHC Service Coverage Sub-Index on RMNH (WHO) <sup>2</sup>           |
| 36 | Treatment of postpartum haemorrhage                                                  | Assumption: 100%                                                                  |

|                                                                 |                                                       |
|-----------------------------------------------------------------|-------------------------------------------------------|
| Other sexual and reproductive health                            |                                                       |
| Treatment of urinary tract infection (UTI)                      | MOH Health Statistics 2019 <sup>1</sup>               |
| Identification and management of infertility                    |                                                       |
| Treatment of syphilis                                           |                                                       |
| Treatment of gonorrhoea                                         |                                                       |
| Treatment of chlamydia                                          |                                                       |
| Treatment of trichomoniasis                                     |                                                       |
| Treatment of PID (Pelvic Inflammatory Disease)- mild cases only |                                                       |
| Menopause Program                                               |                                                       |
| Screen for urogenital dryness                                   | Assumption: 7.5%                                      |
| Screen for mood disorders                                       | Assumption: 7.5%                                      |
| General Practice                                                |                                                       |
| General Practice                                                | Estimate from MOH Health Statistics 2019 <sup>1</sup> |
| Oral Care                                                       |                                                       |
| Dental cleaning and preventive care                             | MOH Health Statistics 2019 <sup>1</sup>               |

**Table S4. References and assumptions used to estimate the total number of services delivered in 2019 in Bahrain**

|                                                                                              |                                                       |
|----------------------------------------------------------------------------------------------|-------------------------------------------------------|
| Immunization                                                                                 |                                                       |
| Rotavirus vaccine                                                                            | MOH Health Statistics 2019 <sup>4</sup>               |
| Measles vaccine                                                                              |                                                       |
| DPT vaccine                                                                                  |                                                       |
| Hib vaccine                                                                                  |                                                       |
| Hep B vaccine                                                                                |                                                       |
| Polio vaccine                                                                                |                                                       |
| BCG vaccine                                                                                  |                                                       |
| Pneumococcal vaccine                                                                         |                                                       |
| Varicella vaccine                                                                            | Estimate from MOH Health Statistics 2019 <sup>4</sup> |
| Influenza vaccine                                                                            | MOH Health Statistics 2019 <sup>4</sup>               |
| Non-Communicable Diseases                                                                    |                                                       |
| CVD & Diabetes                                                                               |                                                       |
| Screening for risk of CVD/Diabetes                                                           | Assumption: 5.0%                                      |
| Follow-up care for those at low risk of CVD/Diabetes (Absolute Risk: 10-20%)                 | Estimate from MOH Health Statistics 2019 <sup>4</sup> |
| Treatment for those with very high cholesterol but low absolute risk of CVD/Diabetes (< 20%) |                                                       |
| Treatment for those with high blood pressure but low absolute risk of CVD/Diabetes (< 20%)   |                                                       |
| Treatment for those with absolute risk of CVD/Diabetes 20-30%                                |                                                       |

|    |                                                                              |                                                                                                 |
|----|------------------------------------------------------------------------------|-------------------------------------------------------------------------------------------------|
| 1  |                                                                              |                                                                                                 |
| 2  |                                                                              |                                                                                                 |
| 3  |                                                                              |                                                                                                 |
| 4  | Treatment for those with high absolute risk of CVD/Diabetes (>30%)           |                                                                                                 |
| 5  | Treatment of new cases of acute myocardial infarction (AMI) with aspirin     |                                                                                                 |
| 6  | Treatment of cases with established ischaemic heart disease (IHD)            |                                                                                                 |
| 7  |                                                                              |                                                                                                 |
| 8  | Treatment for those with established cerebrovascular disease and post stroke |                                                                                                 |
| 9  |                                                                              |                                                                                                 |
| 10 | Treatment of cases with rheumatic heart disease (with benzathine penicillin) |                                                                                                 |
| 11 |                                                                              |                                                                                                 |
| 12 | Standard glycaemic control                                                   | Estimate from MOH Health Statistics 2019 <sup>4</sup>                                           |
| 13 | Intensive glycaemic control                                                  |                                                                                                 |
| 14 | Retinopathy screening                                                        |                                                                                                 |
| 15 | Neuropathy screening and preventive foot care                                |                                                                                                 |
| 16 |                                                                              |                                                                                                 |
| 17 |                                                                              |                                                                                                 |
| 18 | Breast Cancer                                                                |                                                                                                 |
| 19 |                                                                              |                                                                                                 |
| 20 | Basic breast cancer awareness                                                | Assumption: 5.0%                                                                                |
| 21 |                                                                              |                                                                                                 |
| 22 | Screening: clinical breast examination (CBE)                                 | MOH Health Statistics 2019 <sup>4</sup>                                                         |
| 23 |                                                                              |                                                                                                 |
| 24 | Cervical Cancer                                                              |                                                                                                 |
| 25 |                                                                              |                                                                                                 |
| 26 | Papanicolaou test (pap smear)                                                | MOH Health Statistics 2019 <sup>4</sup>                                                         |
| 27 |                                                                              |                                                                                                 |
| 28 | Colorectal Cancer                                                            |                                                                                                 |
| 29 |                                                                              |                                                                                                 |
| 30 | Screening: faecal occult blood testing                                       | Estimate from 'CBE' and 'pap smear'                                                             |
| 31 |                                                                              |                                                                                                 |
| 32 | Respiratory Disease                                                          |                                                                                                 |
| 33 |                                                                              |                                                                                                 |
| 34 | Asthma: Inhaled short acting beta agonist for intermittent asthma            | Assumption derived from UHC Service Coverage Sub-Index on NCDs (WHO) <sup>2</sup>               |
| 35 | Asthma: low dose inhaled beclomethasone + SABA                               |                                                                                                 |
| 36 | Asthma: high dose inhaled beclomethasone + SABA                              |                                                                                                 |
| 37 | COPD: smoking cessation                                                      |                                                                                                 |
| 38 | COPD: inhaled salbutamol                                                     |                                                                                                 |
| 39 | COPD: low-dose oral theophylline                                             |                                                                                                 |
| 40 | COPD: ipratropium inhaler                                                    |                                                                                                 |
| 41 | COPD: exacerbation treatment with antibiotics                                |                                                                                                 |
| 42 | COPD: exacerbation treatment with oral prednisolone                          |                                                                                                 |
| 43 |                                                                              |                                                                                                 |
| 44 | Emergency care                                                               |                                                                                                 |
| 45 |                                                                              |                                                                                                 |
| 46 | Average annual emergency care needs                                          | N/A                                                                                             |
| 47 |                                                                              |                                                                                                 |
| 48 | Child Health                                                                 |                                                                                                 |
| 49 |                                                                              |                                                                                                 |
| 50 | General Health                                                               |                                                                                                 |
| 51 |                                                                              |                                                                                                 |
| 52 | Child general health                                                         | Assumption: 25% of total number of GP Visit (MOH Health Statistics 2019 <sup>4</sup> )          |
| 53 |                                                                              |                                                                                                 |
| 54 | School Health                                                                |                                                                                                 |
| 55 |                                                                              |                                                                                                 |
| 56 | School Health                                                                | MOH Health Statistics 2019 <sup>4</sup>                                                         |
| 57 |                                                                              |                                                                                                 |
| 58 | Deworming                                                                    |                                                                                                 |
| 59 |                                                                              |                                                                                                 |
| 60 | Deworming                                                                    | Assumption derived from UHC Service Coverage Sub-Index on Infectious Disease (WHO) <sup>2</sup> |
|    | Diarrhea management                                                          |                                                                                                 |

|    |                                                                                                           |                                                                                                 |
|----|-----------------------------------------------------------------------------------------------------------|-------------------------------------------------------------------------------------------------|
| 1  | ORS                                                                                                       | Assumption derived from UHC Service Coverage Sub-Index on Infectious Disease (WHO) <sup>2</sup> |
| 2  | Pneumonia                                                                                                 |                                                                                                 |
| 3  | Pneumonia treatment (children)                                                                            | Assumption derived from UHC Service Coverage Sub-Index on Infectious Disease (WHO) <sup>2</sup> |
| 4  | Nutrition                                                                                                 |                                                                                                 |
| 5  | Women of reproductive age and adolescent girls                                                            |                                                                                                 |
| 6  | Intermittent iron-folic acid supplementation                                                              | Assumption: 5.0%                                                                                |
| 7  | Pregnant and lactating women                                                                              |                                                                                                 |
| 8  | Daily iron and folic acid supplementation (pregnant women)                                                | Assumption derived from UHC Service Coverage Sub-Index on RMCH (WHO) <sup>2</sup>               |
| 9  | Intermittent iron and folic acid supplementation (non-anaemic pregnant women)                             |                                                                                                 |
| 10 | Adults                                                                                                    |                                                                                                 |
| 11 | Care for adults with low BMI                                                                              | Estimate from MOH Health Statistics 2019 <sup>4</sup>                                           |
| 12 | Children                                                                                                  |                                                                                                 |
| 13 | Breastfeeding counselling and support                                                                     | Assumption derived from UHC Service Coverage Sub-Index on RMCH (WHO) <sup>2</sup>               |
| 14 | Complementary feeding counselling and support                                                             |                                                                                                 |
| 15 | Intermittent iron supplementation in children                                                             | Assumption derived from UHC Service Coverage Index (WHO) <sup>2</sup>                           |
| 16 | Mental Health                                                                                             |                                                                                                 |
| 17 | Anxiety Disorders                                                                                         |                                                                                                 |
| 18 | Basic psychological treatment for anxiety disorders (mild cases).                                         | Estimate from MOH Health Statistics 2019 <sup>4</sup>                                           |
| 19 | Basic psychosocial treatment and anti-depressant medication for anxiety disorders (moderate-severe cases) |                                                                                                 |
| 20 | Depression                                                                                                |                                                                                                 |
| 21 | Basic psychosocial treatment for mild depression                                                          | Estimate from MOH Health Statistics 2019 <sup>4</sup>                                           |
| 22 | Basic psychosocial treatment and anti-depressant medication of first episode moderate-severe cases        |                                                                                                 |
| 23 | Maternal Newborn and Reproductive Health                                                                  |                                                                                                 |
| 24 | Family planning                                                                                           |                                                                                                 |
| 25 | Pill - Progestin only                                                                                     | United Nations 2019 <sup>5</sup>                                                                |
| 26 | Injectable - 3 month (Depo Provera)                                                                       |                                                                                                 |
| 27 | Other contraceptives                                                                                      |                                                                                                 |
| 28 | IUCD follow-up care                                                                                       | Assumption derived from UHC Service Coverage Index (WHO) <sup>2</sup>                           |
| 29 | Pregnancy Care                                                                                            |                                                                                                 |
| 30 | Tetanus toxoid (pregnant women)                                                                           | Estimate from MOH Health Statistics 2019 <sup>4</sup>                                           |
| 31 | Syphilis detection and treatment (pregnant women)                                                         |                                                                                                 |
| 32 | Basic ANC                                                                                                 |                                                                                                 |
| 33 | Breast feeding education and advices                                                                      |                                                                                                 |
| 34 | Pregnancy care - Treatment of pregnancy complications                                                     |                                                                                                 |
| 35 | Deworming (pregnant women)                                                                                | Assumption: 100%                                                                                |
| 36 | Postpartum care - Other                                                                                   |                                                                                                 |

|                                                |                                                                                   |
|------------------------------------------------|-----------------------------------------------------------------------------------|
| Mastitis                                       | Assumption derived from UHC Service Coverage Sub-Index on RMCH (WHO) <sup>2</sup> |
| Breast feeding education and advices           |                                                                                   |
| Treatment of postpartum haemorrhage            | Assumption: 100%                                                                  |
| Other sexual and reproductive health           |                                                                                   |
| Treatment of urinary tract infection (UTI)     | Assumption derived from UHC Service Coverage Index (WHO) <sup>2</sup>             |
| Identification and management of infertility   |                                                                                   |
| Treatment of syphilis                          |                                                                                   |
| Treatment of gonorrhoea                        |                                                                                   |
| Treatment of chlamydia                         |                                                                                   |
| Treatment of trichomoniasis                    |                                                                                   |
| Treatment of PID (Pelvic Inflammatory Disease) |                                                                                   |
| General Practice                               |                                                                                   |
| General Practice                               | MOH Health Statistics 2019 <sup>4</sup>                                           |
| Oral Care                                      |                                                                                   |
| Dental cleaning and preventive care            | MOH Health Statistics 2019 <sup>4</sup>                                           |

**Table S5. References and assumptions used to estimate the total number of services delivered in 2019 in Kuwait**

|                             |                                         |
|-----------------------------|-----------------------------------------|
| Immunization                |                                         |
| Rotavirus vaccine           | MOH Health Statistics 2019 <sup>5</sup> |
| Measles vaccine             |                                         |
| Pentavalent vaccine         |                                         |
| DPT vaccine                 |                                         |
| Polio vaccine               |                                         |
| BCG vaccine                 |                                         |
| Pneumococcal vaccine        |                                         |
| Varicella vaccine           |                                         |
| DT Adult                    |                                         |
| Measles vaccine             |                                         |
| Varicella vaccine           |                                         |
| Influenza vaccine           |                                         |
| Meningococcal vaccine       |                                         |
| DT paediatrics              |                                         |
| Anti-Rabies                 |                                         |
| Heb B vaccine (paediatrics) |                                         |
| TT                          |                                         |



|    |                                                                                              |                                                                                   |
|----|----------------------------------------------------------------------------------------------|-----------------------------------------------------------------------------------|
| 1  | Non-Communicable Diseases                                                                    |                                                                                   |
| 2  |                                                                                              |                                                                                   |
| 3  | CVD & Diabetes                                                                               |                                                                                   |
| 4  |                                                                                              |                                                                                   |
| 5  | Screening for risk of CVD/Diabetes                                                           | Assumption: CR = 5.0%                                                             |
| 6  |                                                                                              |                                                                                   |
| 7  | Follow-up care for those at low risk of CVD/Diabetes (Absolute Risk: 10-20%)                 | Assumption derived from UHC Service Coverage Sub-Index on NCDs (WHO) <sup>2</sup> |
| 8  | Treatment for those with very high cholesterol but low absolute risk of CVD/Diabetes (< 20%) |                                                                                   |
| 9  | Treatment for those with high blood pressure but low absolute risk of CVD/Diabetes (< 20%)   |                                                                                   |
| 10 | Treatment for those with absolute risk of CVD/Diabetes 20-30%                                |                                                                                   |
| 11 | Treatment for those with high absolute risk of CVD/Diabetes (>30%)                           |                                                                                   |
| 12 | Treatment of new cases of acute myocardial infarction (AMI) with aspirin                     | Provided by MOH                                                                   |
| 13 | Treatment of cases with established ischaemic heart disease (IHD)                            |                                                                                   |
| 14 | Treatment for those with established cerebrovascular disease and post stroke                 |                                                                                   |
| 15 | Standard glycaemic control                                                                   | Estimate from MOH Health Statistics 2019 <sup>6</sup>                             |
| 16 | Intensive glycaemic control                                                                  |                                                                                   |
| 17 | Retinopathy screening                                                                        |                                                                                   |
| 18 | Neuropathy screening and preventive foot care                                                |                                                                                   |
| 19 | Breast Cancer                                                                                |                                                                                   |
| 20 | Basic breast cancer awareness                                                                | Assumption: CR = 5.0%                                                             |
| 21 | Screening: clinical breast examination                                                       | Assumption derived from Oman                                                      |
| 22 | Diagnosis after screened with clinical breast exam                                           | Estimate from WHO-IARC 2020 <sup>3</sup>                                          |
| 23 | Cervical Cancer                                                                              |                                                                                   |
| 24 | Papanicolaou test (pap smear)                                                                | Provided by MOH                                                                   |
| 25 | Colorectal Cancer                                                                            |                                                                                   |
| 26 | Screening: faecal occult blood testing                                                       | Provided by MOH                                                                   |
| 27 | Respiratory Disease                                                                          |                                                                                   |
| 28 | Asthma: inhaled short acting beta agonist for intermittent asthma                            | Estimation from data provided by MOH                                              |
| 29 | Asthma: low dose inhaled beclomethasone + SABA                                               |                                                                                   |
| 30 | Asthma: high dose inhaled beclomethasone + SABA                                              |                                                                                   |
| 31 | COPD: smoking cessation                                                                      |                                                                                   |
| 32 | COPD: inhaled salbutamol                                                                     |                                                                                   |
| 33 | COPD: low-dose oral theophylline                                                             |                                                                                   |
| 34 | COPD: ipratropium inhaler                                                                    |                                                                                   |
| 35 | COPD: exacerbation treatment with antibiotics                                                |                                                                                   |
| 36 | COPD: exacerbation treatment with oral prednisolone                                          |                                                                                   |
| 37 | Emergency care                                                                               |                                                                                   |
| 38 | Average annual emergency care needs                                                          | N/A                                                                               |
| 39 | Child Health                                                                                 |                                                                                   |

|    |                                                                                                           |                                                                                   |
|----|-----------------------------------------------------------------------------------------------------------|-----------------------------------------------------------------------------------|
| 1  | General Health                                                                                            |                                                                                   |
| 2  |                                                                                                           |                                                                                   |
| 3  | Child general health                                                                                      | MOH Health Statistics 2019 <sup>6</sup>                                           |
| 4  |                                                                                                           |                                                                                   |
| 5  | Deworming                                                                                                 |                                                                                   |
| 6  |                                                                                                           |                                                                                   |
| 7  | Deworming                                                                                                 | Provided by MOH                                                                   |
| 8  |                                                                                                           |                                                                                   |
| 9  | Diarrhea management                                                                                       |                                                                                   |
| 10 |                                                                                                           |                                                                                   |
| 11 | ORS                                                                                                       | Estimate based on data provided by MOH                                            |
| 12 |                                                                                                           |                                                                                   |
| 13 | Pneumonia                                                                                                 |                                                                                   |
| 14 |                                                                                                           |                                                                                   |
| 15 | Pneumonia treatment (children)                                                                            | Provided by MOH                                                                   |
| 16 |                                                                                                           |                                                                                   |
| 17 | Nutrition                                                                                                 |                                                                                   |
| 18 |                                                                                                           |                                                                                   |
| 19 | Women of reproductive age and adolescent girls                                                            |                                                                                   |
| 20 | Intermittent iron-folic acid supplementation                                                              | Estimate from data provided by MOH                                                |
| 21 |                                                                                                           |                                                                                   |
| 22 | Pregnant and lactating women                                                                              |                                                                                   |
| 23 | Daily iron and folic acid supplementation (pregnant women)                                                | Assumption derived from UHC Service Coverage Sub-Index on MRCH (WHO) <sup>2</sup> |
| 24 | Intermittent iron and folic acid supplementation (non-anaemic pregnant women)                             |                                                                                   |
| 25 |                                                                                                           |                                                                                   |
| 26 | Adults                                                                                                    |                                                                                   |
| 27 | Care for adults with low BMI                                                                              | Assumption derived from Bahrain                                                   |
| 28 |                                                                                                           |                                                                                   |
| 29 | Children                                                                                                  |                                                                                   |
| 30 | Breastfeeding counselling and support                                                                     | Assumption derived from UHC Service Coverage Sub-Index on MRCH (WHO) <sup>2</sup> |
| 31 | Complementary feeding counselling and support                                                             |                                                                                   |
| 32 |                                                                                                           |                                                                                   |
| 33 | Intermittent iron supplementation in children                                                             | Assumption derived from UHC Service Coverage Index (WHO) <sup>2</sup>             |
| 34 |                                                                                                           |                                                                                   |
| 35 | Mental Health                                                                                             |                                                                                   |
| 36 |                                                                                                           |                                                                                   |
| 37 | Anxiety Disorders                                                                                         |                                                                                   |
| 38 | Basic psychological treatment for anxiety disorders (mild cases).                                         | OneHealth Tool <sup>7</sup>                                                       |
| 39 | Basic psychosocial treatment and anti-depressant medication for anxiety disorders (moderate-severe cases) |                                                                                   |
| 40 |                                                                                                           |                                                                                   |
| 41 | Depression                                                                                                |                                                                                   |
| 42 |                                                                                                           |                                                                                   |
| 43 | Basic psychosocial treatment for mild depression                                                          | OneHealth Tool <sup>7</sup>                                                       |
| 44 | Basic psychosocial treatment and anti-depressant medication of first episode moderate-severe cases        |                                                                                   |
| 45 |                                                                                                           |                                                                                   |
| 46 | Maternal Newborn and Reproductive Health                                                                  |                                                                                   |
| 47 |                                                                                                           |                                                                                   |
| 48 | Family planning                                                                                           |                                                                                   |
| 49 |                                                                                                           |                                                                                   |
| 50 | Pill - Progestin only                                                                                     | United Nations 2019 <sup>5</sup>                                                  |
| 51 | Injectable - 3 month (depo provera)                                                                       |                                                                                   |
| 52 | Other contraceptives                                                                                      |                                                                                   |
| 53 |                                                                                                           |                                                                                   |
| 54 | IUCD follow-up care                                                                                       | Assumption derived from UHC Service Coverage Index (WHO) <sup>2</sup>             |
| 55 |                                                                                                           |                                                                                   |
| 56 | Management of abortion complications                                                                      |                                                                                   |
| 57 |                                                                                                           |                                                                                   |
| 58 | Post-abortion case management                                                                             | Assumption (70.0%)                                                                |
| 59 |                                                                                                           |                                                                                   |
| 60 | Pregnancy Care                                                                                            |                                                                                   |

|                                                       |                                                                       |
|-------------------------------------------------------|-----------------------------------------------------------------------|
| Tetanus toxoid (pregnant women)                       | Estimate based on data provided by MOH.                               |
| Syphilis detection and treatment (pregnant women)     |                                                                       |
| Basic ANC                                             |                                                                       |
| Breast feeding education and advices                  |                                                                       |
| Pregnancy care - Treatment of pregnancy complications |                                                                       |
| Deworming (pregnant women)                            | Assumption (100.0%)                                                   |
| Postpartum care - Other                               |                                                                       |
| Mastitis                                              | Assumption derived from UHC Service Coverage Index (WHO) <sup>2</sup> |
| Breast feeding education and advices                  |                                                                       |
| Treatment of postpartum haemorrhage                   | Estimate based on data provided by MOH.                               |
| Other sexual and reproductive health                  |                                                                       |
| Treatment of urinary tract infection (UTI)            | Provided by MOH                                                       |
| Cervical cancer screening                             |                                                                       |
| Identification and management of infertility          |                                                                       |
| Treatment of syphilis                                 | Estimate based on data provided by MOH                                |
| Treatment of gonorrhoea                               | Provided by MOH                                                       |
| Treatment of chlamydia                                | Estimate based on data provided by MOH                                |
| Treatment of trichomoniasis                           |                                                                       |
| Treatment of PID (Pelvic Inflammatory Disease)        | Provided by MOH                                                       |
| Other                                                 |                                                                       |
| Management of pre pubertal problems                   | Provided by MOH                                                       |
| Management of PCO                                     |                                                                       |
| Management of hirsutism                               | Estimate based on data provided by MOH                                |
| Management of irregular cycles                        | Provided by MOH                                                       |
| Management of amenorrhoea                             |                                                                       |
| Management of abnormal uterine bleeding               |                                                                       |
| Management of mild endometriosis                      |                                                                       |
| Postmenopausal care                                   |                                                                       |
| General Practice                                      |                                                                       |
| General Practice                                      | MOH Health Statistics 2019 <sup>6</sup>                               |
| Oral Care                                             |                                                                       |
| Dental cleaning and preventive care                   | MOH Health Statistics 2019 <sup>6</sup>                               |

**Table S6. References and assumptions used to estimate the total number of services delivered in 2019 in Qatar**

|                                                                                              |                                                                    |
|----------------------------------------------------------------------------------------------|--------------------------------------------------------------------|
| Immunization                                                                                 |                                                                    |
| Rotavirus vaccine                                                                            | Global Health Observatory (WHO) <sup>2</sup>                       |
| Measles vaccine                                                                              | Qatar Health Statistics 2019 <sup>8</sup>                          |
| DPT vaccine                                                                                  |                                                                    |
| Hib vaccine                                                                                  |                                                                    |
| Hep B vaccine                                                                                |                                                                    |
| Polio vaccine                                                                                |                                                                    |
| BCG vaccine                                                                                  |                                                                    |
| Pneumococcal vaccine                                                                         |                                                                    |
| Varicella vaccine                                                                            |                                                                    |
| Influenza vaccine                                                                            | Assumption derived from GCC countries                              |
| Non-Communicable Diseases                                                                    |                                                                    |
| CVD & Diabetes                                                                               |                                                                    |
| Screening for risk of CVD/Diabetes                                                           | Assumption: 5%                                                     |
| Follow-up care for those at low risk of CVD/Diabetes (Absolute Risk: 10-20%)                 | Estimate from PHCC Official Statistics                             |
| Treatment for those with very high cholesterol but low absolute risk of CVD/Diabetes (< 20%) |                                                                    |
| Treatment for those with high blood pressure but low absolute risk of CVD/Diabetes (< 20%)   |                                                                    |
| Treatment for those with absolute risk of CVD/Diabetes 20-30%                                |                                                                    |
| Treatment for those with high absolute risk of CVD/Diabetes (>30%)                           |                                                                    |
| Treatment of new cases of acute myocardial infarction (AMI) with aspirin                     |                                                                    |
| Treatment of cases with established ischaemic heart disease (IHD)                            |                                                                    |
| Treatment for those with established cerebrovascular disease and post stroke                 |                                                                    |
| Treatment of cases with rheumatic heart disease (with benzathine penicillin)                 |                                                                    |
| Standard glycaemic control                                                                   |                                                                    |
| Intensive glycaemic control                                                                  |                                                                    |
| Retinopathy screening                                                                        | Assumption: 1%                                                     |
| Neuropathy screening and preventive foot care                                                | Assumption: 1%                                                     |
| Breast Cancer                                                                                |                                                                    |
| Basic breast cancer awareness                                                                | Assumption: 5%                                                     |
| Screening: Clinical Breast Examination                                                       | Assumption derived from GCC countries and PHCC Official Statistics |
| Cervical Cancer                                                                              |                                                                    |
| Papanicolaou test (Pap smear)                                                                | Assumption derived from GCC countries and PHCC Official Statistics |
| Colorectal Cancer                                                                            |                                                                    |
| Screening: Fecal occult blood testing                                                        | Assumption derived from GCC countries and PHCC Official Statistics |
| Allied Health                                                                                |                                                                    |
| Allied Health                                                                                | PHCC Official Statistics                                           |

|    |                                                                                                           |                                                                                         |
|----|-----------------------------------------------------------------------------------------------------------|-----------------------------------------------------------------------------------------|
| 1  | Respiratory Disease                                                                                       |                                                                                         |
| 2  |                                                                                                           |                                                                                         |
| 3  | Asthma: Inhaled short acting beta agonist for intermittent asthma                                         | PHCC Official Statistics                                                                |
| 4  | Asthma: Low dose inhaled beclomethasone + SABA                                                            |                                                                                         |
| 5  | Asthma: High dose inhaled beclomethasone + SABA                                                           |                                                                                         |
| 6  | COPD: Smoking cessation                                                                                   |                                                                                         |
| 7  | COPD: Inhaled salbutamol                                                                                  |                                                                                         |
| 8  | COPD: Low-dose oral theophylline                                                                          |                                                                                         |
| 9  | COPD: Ipratropium inhaler                                                                                 |                                                                                         |
| 10 | COPD: exacerbation treatment with antibiotics                                                             |                                                                                         |
| 11 | COPD: exacerbation treatment with oral prednisolone                                                       |                                                                                         |
| 12 | Emergency care                                                                                            |                                                                                         |
| 13 | Average annual emergency care needs                                                                       | N/A                                                                                     |
| 14 | Child Health                                                                                              |                                                                                         |
| 15 | General Health                                                                                            |                                                                                         |
| 16 | Child General Health                                                                                      | Estimate from PHCC Official Statistics                                                  |
| 17 | General Health                                                                                            |                                                                                         |
| 18 | School Health                                                                                             | PHCC Official Statistics                                                                |
| 19 | Deworming                                                                                                 |                                                                                         |
| 20 | Deworming                                                                                                 | PHCC Official Statistics                                                                |
| 21 | Diarrhea management                                                                                       |                                                                                         |
| 22 | ORS                                                                                                       | Assumption derived from UHC Service Coverage Index for Infectious Diseases <sup>2</sup> |
| 23 | Pneumonia                                                                                                 |                                                                                         |
| 24 | Pneumonia treatment (children)                                                                            | Assumption derived from UHC Service Coverage Index for Infectious Diseases <sup>2</sup> |
| 25 | Nutrition                                                                                                 |                                                                                         |
| 26 | Women of reproductive age and adolescent girls                                                            |                                                                                         |
| 27 | Intermittent iron-folic acid supplementation                                                              | Assumption: 50%                                                                         |
| 28 | Pregnant and lactating women                                                                              |                                                                                         |
| 29 | Daily iron and folic acid supplementation (pregnant women)                                                | Estimate from data provided by PHCC Official Statistics and World Bank <sup>9</sup>     |
| 30 | Intermittent iron and folic acid supplementation (non-anaemic pregnant women)                             |                                                                                         |
| 31 | Adults                                                                                                    |                                                                                         |
| 32 | Care for adults with low BMI                                                                              | Assumption: 2.5%                                                                        |
| 33 | Children                                                                                                  |                                                                                         |
| 34 | Breastfeeding counselling and support                                                                     | Assumption: 70%                                                                         |
| 35 | Intermittent iron supplementation in children                                                             | Assumption derived from Zainel et al. (2018) <sup>10</sup>                              |
| 36 | Mental Health                                                                                             |                                                                                         |
| 37 | Anxiety Disorders                                                                                         |                                                                                         |
| 38 | Basic psychological treatment for anxiety disorders (mild cases).                                         | PHCC Official Statistics                                                                |
| 39 | Basic psychosocial treatment and anti-depressant medication for anxiety disorders (moderate-severe cases) |                                                                                         |
| 40 | Depression                                                                                                |                                                                                         |

|                                                                                                    |                                        |
|----------------------------------------------------------------------------------------------------|----------------------------------------|
| Basic psychosocial treatment for mild depression                                                   | PHCC Official Statistics               |
| Basic psychosocial treatment and anti-depressant medication of first episode moderate-severe cases |                                        |
| Maternal Newborn and Reproductive Health                                                           |                                        |
| Family planning                                                                                    |                                        |
| Contraception Management                                                                           | Estimate from PHCC Official Statistics |
| Management of abortion complications                                                               |                                        |
| Post-abortion case management                                                                      | Estimate from PHCC Official Statistics |
| Pregnancy Care                                                                                     |                                        |
| Tetanus toxoid (pregnant women)                                                                    | Estimate from PHCC Official Statistics |
| Syphilis detection and treatment (pregnant women)                                                  |                                        |
| Basic ANC                                                                                          |                                        |
| Breast feeding education and advices                                                               |                                        |
| Postpartum care - Other                                                                            |                                        |
| Postpartum Care Examination                                                                        | PHCC Official Statistics               |
| Treatment of postpartum haemorrhage                                                                |                                        |
| Other sexual and reproductive health                                                               |                                        |
| Treatment of urinary tract infection (UTI)                                                         | PHCC Official Statistics               |
| Identification and management of infertility                                                       |                                        |
| Treatment of syphilis                                                                              |                                        |
| Treatment of gonorrhoea                                                                            |                                        |
| Treatment of chlamydia                                                                             |                                        |
| Treatment of trichomoniasis                                                                        |                                        |
| Treatment of PID (Pelvic Inflammatory Disease)                                                     |                                        |
| General Practice                                                                                   |                                        |
| General Practice                                                                                   | PHCC Official Statistics               |
| Oral Care and Cancer                                                                               |                                        |
| Dental cleaning and preventive care                                                                | PHCC Official Statistics               |

**Table S7. References and assumptions used to estimate the total number of services delivered in 2019 in UAE**

|                      |                                         |
|----------------------|-----------------------------------------|
| Immunization         | WHO-UNICEF Estimates 2019 <sup>11</sup> |
| Rotavirus vaccine    |                                         |
| Measles vaccine      |                                         |
| DPT vaccine          |                                         |
| Hib vaccine          |                                         |
| Hep B vaccine        |                                         |
| Polio vaccine        |                                         |
| BCG vaccine          |                                         |
| Pneumococcal vaccine |                                         |

|    |                                                                                              |                                                                                   |                                                                                                                 |
|----|----------------------------------------------------------------------------------------------|-----------------------------------------------------------------------------------|-----------------------------------------------------------------------------------------------------------------|
| 1  | HPV vaccine                                                                                  | HPV Information Centre <sup>12</sup>                                              |                                                                                                                 |
| 2  | Influenza vaccine                                                                            | Assumption derived from Bahrain                                                   |                                                                                                                 |
| 3  | Non-Communicable Diseases                                                                    |                                                                                   |                                                                                                                 |
| 4  | CVD & Diabetes                                                                               |                                                                                   |                                                                                                                 |
| 5  | Screening for risk of CVD/Diabetes                                                           | Assumption: 5.0%                                                                  |                                                                                                                 |
| 6  | Follow-up care for those at low risk of CVD/Diabetes (Absolute Risk: 10-20%)                 | Assumption: 5.0%                                                                  |                                                                                                                 |
| 7  | Treatment for those with very high cholesterol but low absolute risk of CVD/Diabetes (< 20%) | Assumption derived from UHC Service Coverage Sub-Index on NCDs (WHO) <sup>2</sup> |                                                                                                                 |
| 8  | Treatment for those with high blood pressure but low absolute risk of CVD/Diabetes (< 20%)   |                                                                                   |                                                                                                                 |
| 9  | Treatment for those with absolute risk of CVD/Diabetes 20-30%                                |                                                                                   |                                                                                                                 |
| 10 | Treatment for those with high absolute risk of CVD/Diabetes (>30%)                           |                                                                                   |                                                                                                                 |
| 11 | Treatment of new cases of acute myocardial infarction (AMI) with aspirin                     |                                                                                   |                                                                                                                 |
| 12 | Treatment of cases with established ischaemic heart disease (IHD)                            |                                                                                   |                                                                                                                 |
| 13 | Treatment for those with established cerebrovascular disease and post stroke                 |                                                                                   |                                                                                                                 |
| 14 | Treatment of cases with rheumatic heart disease (with benzathine penicillin)                 |                                                                                   |                                                                                                                 |
| 15 | Standard glycaemic control                                                                   |                                                                                   | Estimate from OneHealth Tool <sup>7</sup> and Dubai Government Annual Health Statistics Book 2019 <sup>13</sup> |
| 16 | Intensive glycaemic control                                                                  |                                                                                   |                                                                                                                 |
| 17 | Retinopathy screening                                                                        |                                                                                   |                                                                                                                 |
| 18 | Neuropathy screening and preventive foot care                                                |                                                                                   |                                                                                                                 |
| 19 | Breast Cancer                                                                                |                                                                                   |                                                                                                                 |
| 20 | Basic breast cancer awareness                                                                | Assumption: 5.0%                                                                  |                                                                                                                 |
| 21 | Screening: Clinical Breast Examination                                                       | Estimate from Bahrain                                                             |                                                                                                                 |
| 22 | Screening: Mammography                                                                       | Assumption: 0.9%                                                                  |                                                                                                                 |
| 23 | Diagnosis after Screened with Clinical Breast Exam                                           | Estimation from WHO IARC 2020 <sup>3</sup>                                        |                                                                                                                 |
| 24 | Diagnosis after Screened with Mammography                                                    |                                                                                   |                                                                                                                 |
| 25 | Diagnosis without screening for breast cancer                                                |                                                                                   |                                                                                                                 |
| 26 | Cervical Cancer                                                                              |                                                                                   |                                                                                                                 |
| 27 | Visual inspection with acetic acid (VIA)                                                     | Assumption: 5.0%                                                                  |                                                                                                                 |
| 28 | Papanicolaou test (Pap smear)                                                                | Assumption: 9.3%                                                                  |                                                                                                                 |
| 29 | HPV DNA + VIA                                                                                | Assumption: 5.0%                                                                  |                                                                                                                 |
| 30 | Colorectal Cancer                                                                            |                                                                                   |                                                                                                                 |
| 31 | Screening: faecal immunochemical test                                                        | Assumption : 0.5%                                                                 |                                                                                                                 |
| 32 | Screening: faecal occult blood testing                                                       |                                                                                   |                                                                                                                 |
| 33 | Diagnosis for colorectal cancer screened with FIT                                            | Assumption: 100%                                                                  |                                                                                                                 |
| 34 | Diagnosis for colorectal cancer screened with FOBT                                           |                                                                                   |                                                                                                                 |
| 35 | Diagnosis without screening for colorectal cancer (symptom based)                            |                                                                                   |                                                                                                                 |
| 36 | Respiratory Disease                                                                          |                                                                                   |                                                                                                                 |
| 37 | Asthma: Inhaled short acting beta agonist for intermittent asthma                            | Assumption derived from UHC Service Coverage Sub-Index on NCDs (WHO) <sup>3</sup> |                                                                                                                 |
| 38 | Asthma: Low dose inhaled beclomethasone + SABA                                               |                                                                                   |                                                                                                                 |

|    |                                                                                                           |                                                                            |
|----|-----------------------------------------------------------------------------------------------------------|----------------------------------------------------------------------------|
| 1  |                                                                                                           |                                                                            |
| 2  |                                                                                                           |                                                                            |
| 3  | Asthma: High dose inhaled beclomethasone + SABA                                                           |                                                                            |
| 4  |                                                                                                           |                                                                            |
| 5  | COPD: Smoking cessation                                                                                   |                                                                            |
| 6  | COPD: Inhaled salbutamol                                                                                  |                                                                            |
| 7  |                                                                                                           |                                                                            |
| 8  | COPD: Ipratropium inhaler                                                                                 |                                                                            |
| 9  | COPD: exacerbation treatment with antibiotics                                                             |                                                                            |
| 10 |                                                                                                           |                                                                            |
| 11 | COPD: exacerbation treatment with oral prednisolone                                                       |                                                                            |
| 12 | COPD: exacerbation treatment with oxygen                                                                  |                                                                            |
| 13 |                                                                                                           |                                                                            |
| 14 | Emergency care                                                                                            |                                                                            |
| 15 | Average annual emergency care needs                                                                       | N/A                                                                        |
| 16 |                                                                                                           |                                                                            |
| 17 | Oral Care                                                                                                 |                                                                            |
| 18 | Oral and dental care                                                                                      | Estimate from Dubai Government Annual Health Statistics Book <sup>13</sup> |
| 19 |                                                                                                           |                                                                            |
| 20 | Child Health                                                                                              |                                                                            |
| 21 | General Health (Children)                                                                                 |                                                                            |
| 22 | General Health (Children)                                                                                 | Assumption: 25% of GP visits                                               |
| 23 |                                                                                                           |                                                                            |
| 24 | Diarrhea management                                                                                       |                                                                            |
| 25 | ORS                                                                                                       |                                                                            |
| 26 |                                                                                                           | Assumption derived from UHC Service Coverage Index (WHO) <sup>2</sup>      |
| 27 | Antibiotics for treatment of dysentery                                                                    |                                                                            |
| 28 | Pneumonia                                                                                                 |                                                                            |
| 29 | Pneumonia treatment (children)                                                                            | Assumption derived from UHC Service Coverage Index (WHO) <sup>2</sup>      |
| 30 |                                                                                                           |                                                                            |
| 31 | Routine Child Health Care Visit                                                                           |                                                                            |
| 32 | Routine Child Health Care Visit (< 1 year)                                                                |                                                                            |
| 33 |                                                                                                           | Assumption derived from UHC Service Coverage Index (WHO) <sup>2</sup>      |
| 34 | Routine Child Health Care Visit (1-5 years)                                                               |                                                                            |
| 35 |                                                                                                           |                                                                            |
| 36 | Nutrition                                                                                                 |                                                                            |
| 37 | Adults                                                                                                    |                                                                            |
| 38 | Care for Obese adults                                                                                     |                                                                            |
| 39 | Care for Diabetic adults                                                                                  |                                                                            |
| 40 | Care for adults with hyperuricemia                                                                        |                                                                            |
| 41 |                                                                                                           | Assumption: 5.0%                                                           |
| 42 | Care for adults with kidney diseases                                                                      |                                                                            |
| 43 | Care for adults with nutritional anaemia                                                                  |                                                                            |
| 44 | Care for adults with food allergies and sensitivities                                                     |                                                                            |
| 45 |                                                                                                           |                                                                            |
| 46 | All populations                                                                                           |                                                                            |
| 47 |                                                                                                           |                                                                            |
| 48 | Food fortification                                                                                        | Assumption: 100%                                                           |
| 49 | Children                                                                                                  |                                                                            |
| 50 |                                                                                                           |                                                                            |
| 51 | Management of severe malnutrition                                                                         |                                                                            |
| 52 |                                                                                                           | Assumption derived from UHC Service Coverage Index (WHO) <sup>2</sup>      |
| 53 | Management of moderate acute malnutrition                                                                 |                                                                            |
| 54 | Management of Food allergies or Food intolerances                                                         | Assumption: 5.0%                                                           |
| 55 |                                                                                                           |                                                                            |
| 56 | Mental Health                                                                                             |                                                                            |
| 57 | Anxiety Disorders                                                                                         |                                                                            |
| 58 |                                                                                                           |                                                                            |
| 59 | Basic psychosocial treatment and anti-depressant medication for anxiety disorders (moderate-severe cases) | Estimate from Abu Dhabi Government Annual Health Statistics <sup>14</sup>  |
| 60 |                                                                                                           |                                                                            |



|    |                                                                                                                           |                                                                                   |
|----|---------------------------------------------------------------------------------------------------------------------------|-----------------------------------------------------------------------------------|
| 1  | Basic psychological treatment for anxiety disorders (mild cases).                                                         |                                                                                   |
| 2  |                                                                                                                           |                                                                                   |
| 3  | Depression                                                                                                                |                                                                                   |
| 4  |                                                                                                                           |                                                                                   |
| 5  | Basic psychosocial treatment for mild depression                                                                          | Estimate from Abu Dhabi Government Annual Health Statistics <sup>14</sup>         |
| 6  | Basic psychosocial treatment and anti-depressant medication of first episode moderate-severe cases                        |                                                                                   |
| 7  | Intensive psychosocial treatment and anti-depressant medication of recurrent moderate-severe cases on a maintenance basis |                                                                                   |
| 8  | Psychological care for peri-natal                                                                                         |                                                                                   |
| 9  | Psychosis                                                                                                                 |                                                                                   |
| 10 | Basic psychosocial support and anti-psychotic medication                                                                  | Estimate from Abu Dhabi Government Annual Health Statistics <sup>14</sup>         |
| 11 | Bipolar Disorders                                                                                                         |                                                                                   |
| 12 | Basic psychosocial treatment, advice, and follow-up for bipolar disorder, plus mood-stabilizing medication                | Estimate from Abu Dhabi Government Annual Health Statistics <sup>14</sup>         |
| 13 | Epilepsy                                                                                                                  |                                                                                   |
| 14 | Basic psychosocial support, advice, and follow-up, plus anti-epileptic medication                                         | Estimate from Abu Dhabi Government Annual Health Statistics <sup>14</sup>         |
| 15 | Developmental Disorders                                                                                                   |                                                                                   |
| 16 | Basic psychosocial treatment, advice, and follow-up for developmental disorders                                           | Estimate from Abu Dhabi Government Annual Health Statistics <sup>14</sup>         |
| 17 | Conduct Disorders                                                                                                         |                                                                                   |
| 18 | Basic psychosocial treatment, advice, and follow-up for behavioural disorders                                             | Estimate from Abu Dhabi Government Annual Health Statistics <sup>14</sup>         |
| 19 | Attention Disorders                                                                                                       |                                                                                   |
| 20 | Methylphenidate medication                                                                                                | Estimate from Abu Dhabi Government Annual Health Statistics <sup>14</sup>         |
| 21 | Dementia                                                                                                                  |                                                                                   |
| 22 | Assessment, diagnosis, advice, and follow-up for dementia                                                                 | Estimate from Abu Dhabi Government Annual Health Statistics <sup>14</sup>         |
| 23 | Pharmacological treatment of dementia                                                                                     |                                                                                   |
| 24 | Alcohol Use/Dependence                                                                                                    |                                                                                   |
| 25 | Identification and assessment of new cases of alcohol use/dependence                                                      | Estimate from Abu Dhabi Government Annual Health Statistics <sup>14</sup>         |
| 26 | Drug Use/Dependence                                                                                                       |                                                                                   |
| 27 | Brief interventions and follow-up for drug use/dependence                                                                 | Estimate from Abu Dhabi Government Annual Health Statistics <sup>14</sup>         |
| 28 | Maternal Newborn and Reproductive Health                                                                                  |                                                                                   |
| 29 | Preconception Care (PCC)                                                                                                  |                                                                                   |
| 30 | Preconception Care (PCC)                                                                                                  | Assumption derived from UHC Service Coverage Sub-Index on MNCH (WHO) <sup>2</sup> |
| 31 | Antenatal Care (ANC)                                                                                                      |                                                                                   |
| 32 | Antenatal Care (ANC)                                                                                                      | Assumption: 99% ANC Coverage                                                      |
| 33 | Postnatal Care (PNC)                                                                                                      |                                                                                   |
| 34 | Postnatal Care (PNC)                                                                                                      | Assumption derived from UHC Service Coverage Sub-Index on MNCH (WHO) <sup>2</sup> |
| 35 | Premarital screening program                                                                                              |                                                                                   |
| 36 | Premarital screening program                                                                                              | Assumption: 100%                                                                  |
| 37 | General Practice                                                                                                          |                                                                                   |
| 38 | General Practice                                                                                                          | Estimate from Dubai Government Annual Health Statistics Book <sup>13</sup>        |
| 39 |                                                                                                                           |                                                                                   |
| 40 |                                                                                                                           |                                                                                   |
| 41 |                                                                                                                           |                                                                                   |
| 42 |                                                                                                                           |                                                                                   |
| 43 |                                                                                                                           |                                                                                   |
| 44 |                                                                                                                           |                                                                                   |
| 45 |                                                                                                                           |                                                                                   |
| 46 |                                                                                                                           |                                                                                   |
| 47 |                                                                                                                           |                                                                                   |
| 48 |                                                                                                                           |                                                                                   |
| 49 |                                                                                                                           |                                                                                   |
| 50 |                                                                                                                           |                                                                                   |
| 51 |                                                                                                                           |                                                                                   |
| 52 |                                                                                                                           |                                                                                   |
| 53 |                                                                                                                           |                                                                                   |
| 54 |                                                                                                                           |                                                                                   |
| 55 |                                                                                                                           |                                                                                   |
| 56 |                                                                                                                           |                                                                                   |
| 57 |                                                                                                                           |                                                                                   |
| 58 |                                                                                                                           |                                                                                   |
| 59 |                                                                                                                           |                                                                                   |
| 60 |                                                                                                                           |                                                                                   |

**Table S8. References and assumptions used to estimate the total number of services delivered in 2019 in KSA**

|                                                                                              |                                                                                   |
|----------------------------------------------------------------------------------------------|-----------------------------------------------------------------------------------|
| Immunization                                                                                 |                                                                                   |
| Measles vaccine                                                                              | MOH Statistical Yearbook 2019 <sup>15</sup>                                       |
| Pentavalent vaccine                                                                          |                                                                                   |
| Varicella vaccine                                                                            | Estimate from MOH Statistical Yearbook 2019 <sup>15</sup>                         |
| Polio vaccine                                                                                | MOH Statistical Yearbook 2019 <sup>15</sup>                                       |
| BCG vaccine                                                                                  |                                                                                   |
| Rubella vaccine                                                                              |                                                                                   |
| Pneumococcal vaccine                                                                         |                                                                                   |
| HPV vaccine                                                                                  | Assumption: 5.0%                                                                  |
| Non-Communicable Diseases                                                                    |                                                                                   |
| CVD & Diabetes                                                                               |                                                                                   |
| Screening for risk of CVD/Diabetes                                                           | Assumption: 5.0%                                                                  |
| Follow-up care for those at low risk of CVD/Diabetes (Absolute Risk: 10-20%)                 | Assumption: 5.0%                                                                  |
| Treatment for those with very high cholesterol but low absolute risk of CVD/Diabetes (< 20%) | Estimate from MOH Statistical Yearbook 2019 <sup>15</sup>                         |
| Treatment for those with high blood pressure but low absolute risk of CVD/Diabetes (< 20%)   |                                                                                   |
| Treatment for those with absolute risk of CVD/Diabetes 20-30%                                |                                                                                   |
| Treatment for those with high absolute risk of CVD/Diabetes (>30%)                           |                                                                                   |
| Treatment of new cases of acute myocardial infarction (AMI) with aspirin                     |                                                                                   |
| Treatment of cases with established ischaemic heart disease (IHD)                            | KSA World Health Survey <sup>16</sup>                                             |
| Treatment for those with established cerebrovascular disease and post stroke                 |                                                                                   |
| Treatment of cases with rheumatic heart disease (with benzathine penicillin)                 | Assumption derived from UHC Service Coverage Sub-Index on NCDs (WHO) <sup>2</sup> |
| Standard glycaemic control                                                                   | Estimate from MOH Statistical Yearbook 2019 <sup>15</sup>                         |
| Intensive glycaemic control                                                                  |                                                                                   |
| Neuropathy screening and preventive foot care                                                |                                                                                   |
| Breast Cancer                                                                                |                                                                                   |
| Basic breast cancer awareness                                                                | Assumption: 5.0%                                                                  |
| Screening: Clinical Breast Examination                                                       | Assumption derived from Bahrain                                                   |
| Screening: Mammography                                                                       | KSA World Health Survey <sup>16</sup>                                             |
| Diagnosis: Screened with clinical breast exam                                                | Estimate from WHO IARC 2020 <sup>3</sup>                                          |
| Diagnosis: Screened with mammogram                                                           |                                                                                   |
| Post-treatment surveillance for breast cancer patients                                       | Assumption derived from UHC Service Coverage Sub-Index on NCDs (WHO) <sup>2</sup> |
| Cervical Cancer                                                                              |                                                                                   |
| Papanicolaou test (Pap smear)                                                                | KSA World Health Survey <sup>16</sup>                                             |
| Post treatment surveillance for cervical cancer                                              | Assumption derived from UHC Service Coverage Sub-Index on NCDs (WHO) <sup>2</sup> |
| Colorectal Cancer                                                                            |                                                                                   |

|    |                                                                                 |                                                                                   |
|----|---------------------------------------------------------------------------------|-----------------------------------------------------------------------------------|
| 1  | Screening: faecal occult blood testing                                          | Estimate from Aljumah and Aljebreen (2017) <sup>17</sup>                          |
| 2  | Screening: Sigmoidoscopy                                                        |                                                                                   |
| 3  | Screening: Colonoscopy                                                          |                                                                                   |
| 4  | Diagnosis for colorectal cancer screened with FOBT                              | Estimation from WHO IARC 2020 <sup>3</sup>                                        |
| 5  | Diagnosis without screening for colorectal cancer (symptom based)               |                                                                                   |
| 6  | Post treatment surveillance for colorectal cancer                               | Assumption derived from UHC Service Coverage Sub-Index on NCDs (WHO) <sup>2</sup> |
| 7  | Respiratory Disease                                                             | Estimate from MOH Statistical Yearbook 2019 <sup>15</sup>                         |
| 8  | Asthma: Inhaled short acting beta agonist for intermittent asthma               |                                                                                   |
| 9  | Asthma: Low dose inhaled fluticasone + SABA                                     |                                                                                   |
| 10 | Asthma: High dose inhaled fluticasone + SABA                                    |                                                                                   |
| 11 | Asthma: Theophylline + High dose inhaled fluticasone + SABA                     |                                                                                   |
| 12 | Asthma: Oral Prednisolone + Theophylline + High dose inhaled fluticasone + SABA |                                                                                   |
| 13 | COPD: Smoking cessation                                                         |                                                                                   |
| 14 | COPD: Inhaled salbutamol                                                        |                                                                                   |
| 15 | COPD: Low-dose oral theophylline                                                |                                                                                   |
| 16 | COPD: Ipratropium inhaler                                                       |                                                                                   |
| 17 | COPD: exacerbation treatment with antibiotics                                   |                                                                                   |
| 18 | COPD: exacerbation treatment with oral prednisolone                             |                                                                                   |
| 19 | COPD: exacerbation treatment with oxygen                                        |                                                                                   |
| 20 | Emergency care                                                                  | N/A                                                                               |
| 21 | Average annual emergency care needs                                             |                                                                                   |
| 22 | Child Health                                                                    | MOH Statistical Yearbook 2019 <sup>15</sup>                                       |
| 23 | General                                                                         |                                                                                   |
| 24 | General Health (Children)                                                       |                                                                                   |
| 25 | Zinc supplementation                                                            |                                                                                   |
| 26 | Diarrhea management                                                             |                                                                                   |
| 27 | ORS                                                                             |                                                                                   |
| 28 | Zinc (diarrhea treatment)                                                       |                                                                                   |
| 29 | Antibiotics for treatment of dysentery                                          |                                                                                   |
| 30 | Treatment of severe diarrhea                                                    |                                                                                   |
| 31 | Pneumonia                                                                       |                                                                                   |
| 32 | Pneumonia treatment (children, mild cases)                                      | Assumption derived from UHC Service Coverage Index (WHO) <sup>2</sup>             |
| 33 | Treatment of severe pneumonia                                                   |                                                                                   |
| 34 | Nutrition                                                                       | Estimate from Alreshidi et al. (2018) <sup>18</sup>                               |
| 35 | Women of reproductive age and adolescent girls                                  |                                                                                   |
| 36 | Intermittent iron-folic acid supplementation                                    |                                                                                   |
| 37 | Pregnant and lactating women                                                    |                                                                                   |
| 38 | Daily iron and folic acid supplementation (pregnant women)                      |                                                                                   |
| 39 | Intermittent iron and folic acid supplementation (non-anaemic pregnant women)   | Estimate from Al-Duraibi and Am-Mutawa (2020) <sup>19</sup>                       |

|                                                                                                            |                                                                               |
|------------------------------------------------------------------------------------------------------------|-------------------------------------------------------------------------------|
| Vitamin A supplementation in pregnant women                                                                | Estimate from Azzeh and Refaat (2020) <sup>20</sup>                           |
| Iodine supplementation in pregnant women                                                                   |                                                                               |
| Adults                                                                                                     |                                                                               |
| Care for adults with low BMI                                                                               | Assumption derived from Bahrain                                               |
| Children                                                                                                   |                                                                               |
| Breastfeeding counselling and support                                                                      | Assumption derived from Service Coverage Sub-Index on MNCH (WHO) <sup>2</sup> |
| Complementary feeding counselling and support                                                              |                                                                               |
| Management of moderate acute malnutrition (children)                                                       | Assumption derived from UHC Service Coverage Index (WHO) <sup>2</sup>         |
| <b>Mental Health</b>                                                                                       |                                                                               |
| Anxiety disorders                                                                                          |                                                                               |
| Basic psychosocial treatment for anxiety disorders (mild cases)                                            | Assumption: 1.0%                                                              |
| Basic psychosocial treatment and anti-depressant medication for anxiety disorders (moderate-severe cases)  |                                                                               |
| Depression                                                                                                 |                                                                               |
| Basic psychosocial treatment for mild depression                                                           | Assumption: 1.0%                                                              |
| Basic psychosocial treatment and anti-depressant medication of first episode moderate-severe cases         |                                                                               |
| Psychosocial care for peri-natal depression                                                                |                                                                               |
| Psychosis                                                                                                  |                                                                               |
| Basic psychosocial support and anti-psychotic medication                                                   | Assumption: 1.0%                                                              |
| Bipolar disorder                                                                                           |                                                                               |
| Basic psychosocial treatment, advice, and follow-up for bipolar disorder, plus mood-stabilizing medication | Assumption: 1.0%                                                              |
| Epilepsy                                                                                                   |                                                                               |
| Basic psychosocial support, advice, and follow-up, plus anti-epileptic medication                          | Assumption: 1.0%                                                              |
| Developmental disorders                                                                                    |                                                                               |
| Basic psychosocial treatment, advice, and follow-up for developmental disorders                            | Assumption: 1.0%                                                              |
| Conduct disorders                                                                                          |                                                                               |
| Basic psychosocial treatment, advice, and follow-up for behavioural disorders                              | Assumption: 1.0%                                                              |
| Dementia                                                                                                   |                                                                               |
| Assessment, diagnosis, advice, and follow-up for dementia                                                  | Assumption: 1.0%                                                              |
| Alcohol use/dependence                                                                                     |                                                                               |
| Identification and assessment of new cases of alcohol use/dependence                                       | Assumption: 1.0%                                                              |
| Brief interventions and follow-up for alcohol use/dependence                                               |                                                                               |
| Drug use/dependence                                                                                        |                                                                               |
| Identification and assessment of new cases of drug use/dependence                                          | Assumption: 1.0%                                                              |
| Brief interventions and follow-up for drug use/dependence                                                  |                                                                               |
| Self-harm/suicide                                                                                          |                                                                               |
| Assess and care for person with self-harm                                                                  | Assumption: 1.0%                                                              |
| <b>Maternal Newborn and Reproductive Health</b>                                                            |                                                                               |
| Family planning                                                                                            |                                                                               |

|                                                       |                                                                                   |
|-------------------------------------------------------|-----------------------------------------------------------------------------------|
| Pill - Standard daily regimen                         | KSA World Health Survey <sup>16</sup>                                             |
| IUD - Copper-T 380-A IUD (10 years)                   |                                                                                   |
| Withdrawal                                            |                                                                                   |
| Pregnancy care - ANC                                  |                                                                                   |
| Tetanus toxoid (pregnant women)                       | Estimate from KSA World Health Survey <sup>16</sup>                               |
| Basic ANC                                             |                                                                                   |
| Pregnancy care - Treatment of pregnancy complications |                                                                                   |
| Hypertensive disorder case management                 | Assumption: 100%                                                                  |
| Childbirth care - Facility births                     |                                                                                   |
| Pre-referral management of labour complications       | Assumption: 100%                                                                  |
| Postpartum care - Other                               |                                                                                   |
| Treatment of postpartum haemorrhage                   | Assumption: 100%                                                                  |
| Other sexual and reproductive health                  |                                                                                   |
| Treatment of urinary tract infection (UTI)            | Assumption derived from UHC Service Coverage Sub-Index on MNCH (WHO) <sup>2</sup> |
| Treatment of syphilis                                 |                                                                                   |
| Treatment of gonorrhoea                               |                                                                                   |
| Treatment of chlamydia                                |                                                                                   |
| Treatment of trichomoniasis                           |                                                                                   |
| Treatment of PID (Pelvic Inflammatory Disease)        |                                                                                   |
| General Practice                                      |                                                                                   |
| General Practice                                      | MOH Statistical Yearbook 2019 <sup>15</sup>                                       |
| Oral Care                                             |                                                                                   |
| Dental cleaning and preventive care                   | MOH Statistical Yearbook 2019 <sup>15</sup>                                       |

## References

1. Sultanate of Oman Ministry of Health. Annual Health Report 2019, 2020.
2. World Health Organization. The Global Health Observatory, 2023.
3. International Agency for Research on Cancer. Global Cancer Observatory. Cancer Today.
4. Ministry of Health of Bahrain. Health Statistics 2019, 2021.
5. United Nations DoEaSA, Population Division,. Contraceptive Use by Method 2019: Data Booklet (ST/ESA/SER.A/435), 2019.
6. Ministry of Health of Kuwait. Annual Health Report 2019. Fifty Sixth Edition (LVI), 20220.
7. Avenir Health. OneHealth Tool. Intervention Assumptions, January 2016.
8. Qatar Planning and Statistics Authority. Health Services Statistics - Chapter 6 2019 [Available from: <https://www.psa.gov.qa/en/statistics1/pages/topicslisting.aspx?parent=Social&child=Health> accessed 24/01/2022 2022.
9. The World Bank. World Bank Open Data, 2022.
10. Zainel A, Osman SRO, Al-Kohji SMS, et al. Iron deficiency, its epidemiological features and feeding practices among infants aged 12 months in Qatar: a cross-sectional study. *BMJ Open* 2018;8(5):e020271. doi: 10.1136/bmjopen-2017-020271 [published Online First: 20180509]
11. World Health Organization and United Nations Children's Fund. WHO/UNICEF estimates of national immunization coverage 2022 [Available from: <https://www.who.int/teams/immunization-vaccines-and-biologicals/immunization-analysis-and-insights/global-monitoring/immunization-coverage/who-unicef-estimates-of-national-immunization-coverage> accessed 06/03/2022.
12. ICO/IARC HPV Information Centre. United Arab Emirates. Human Papillomavirus and Related Cancers, Fact Sheet 2019. 2019
13. Government of Dubai. Open Data Dashboards. Departement of Health 2022 [Available from: <https://www.dha.gov.ae/en/open-data> accessed 04/03/2022.
14. Government of Abu Dhabi. Open Data Dashboards. Departement of Health 2022 [Available from: <https://www.doh.gov.ae/en/resources/opendata> accessed 04/03/2022.
15. Ministry of Health of the Kingdom of Saudi Arabia. Statistical Yearbook 2019. Chapter IV. Health Activities 2021 [Available from: <https://www.moh.gov.sa/en/Ministry/Statistics/book/Pages/default.aspx>.
16. Ministry of Health of the Kingdom of Saudi Arabia. World Health Survey Saudi Arabia 2019. Final Report., 2019.
17. Aljumah AA, Aljebreen AM. Policy of screening for colorectal cancer in Saudi Arabia: A prospective analysis. *Saudi J Gastroenterol* 2017;23(3):161-68. doi: 10.4103/sjg.SJG\_468\_16
18. Alreshidi MA, Haridi HK. Prevalence of anemia and associated risk factors among pregnant women in an urban community at the North of Saudi Arabia. *J Prev Med Hyg* 2021;62(3):E653-e63. doi: 10.15167/2421-4248/jpmh2021.62.3.1880 [published Online First: 20210915]
19. AlDuraibi S, Al-Mutawa J. Knowledge and awareness of folic acid usage in Saudi pregnant women in Riyadh city from 2019-2020. *J Family Med Prim Care* 2020;9(10):5158-64. doi: 10.4103/jfmpc.jfmpc\_638\_20 [published Online First: 20201030]
20. Azzeh F, Refaat B. Iodine adequacy in reproductive age and pregnant women living in the Western region of Saudi Arabia. *BMC Pregnancy Childbirth* 2020;20(1):370. doi: 10.1186/s12884-020-03057-w [published Online First: 20200622]

## CHEERS checklist—Items to include when reporting economic evaluations of health interventions

| Section/item                                              | Item No | Recommendation                                                                                                                                                                                                                                                                                                       | Reported on page No/line No |
|-----------------------------------------------------------|---------|----------------------------------------------------------------------------------------------------------------------------------------------------------------------------------------------------------------------------------------------------------------------------------------------------------------------|-----------------------------|
| <b>Title and abstract</b>                                 |         |                                                                                                                                                                                                                                                                                                                      |                             |
| Title                                                     | 1       | Identify the study as an economic evaluation or use more specific terms such as “cost-effectiveness analysis”, and describe the interventions compared.                                                                                                                                                              | P.1 / L.1-2                 |
| Abstract                                                  | 2       | Provide a structured summary of objectives, perspective, setting, methods (including study design and inputs), results (including base case and uncertainty analyses), and conclusions.                                                                                                                              | P.2 / L.1-28                |
| <b>Introduction</b>                                       |         |                                                                                                                                                                                                                                                                                                                      |                             |
| Background and objectives                                 | 3       | Provide an explicit statement of the broader context for the study.                                                                                                                                                                                                                                                  | P.3 / L.1-28                |
|                                                           |         | Present the study question and its relevance for health policy or practice decisions.                                                                                                                                                                                                                                | P.4-5 / L.30-2              |
| <b>Methods</b>                                            |         |                                                                                                                                                                                                                                                                                                                      |                             |
| Target population and subgroups                           | 4       | Describe characteristics of the base case population and subgroups analysed, including why they were chosen.                                                                                                                                                                                                         | NR                          |
| Settings and location                                     | 5       | State relevant aspects of the system(s) in which the decision(s) need(s) to be made.                                                                                                                                                                                                                                 | NR                          |
| Study perspective                                         | 6       | Describe the perspective of the study and relate this to the costs being evaluated.                                                                                                                                                                                                                                  | P.6 / L.3-14                |
| Comparators                                               | 7       | Describe the interventions or strategies being compared and state why they were chosen.                                                                                                                                                                                                                              | P.6 / L.6-8 & Table S1      |
| Time horizon                                              | 8       | State the time horizon(s) over which costs and consequences are being evaluated and say why appropriate.                                                                                                                                                                                                             | P.4 / L.36                  |
| Discount rate                                             | 9       | Report the choice of discount rate(s) used for costs and outcomes and say why appropriate.                                                                                                                                                                                                                           | NR                          |
| Choice of health outcomes                                 | 10      | Describe what outcomes were used as the measure(s) of benefit in the evaluation and their relevance for the type of analysis performed.                                                                                                                                                                              | NR                          |
| Measurement of effectiveness                              | 11a     | Single study-based estimates: Describe fully the design features of the single effectiveness study and why the single study was a sufficient source of clinical effectiveness data.                                                                                                                                  | NR                          |
|                                                           | 11b     | Synthesis-based estimates: Describe fully the methods used for identification of included studies and synthesis of clinical effectiveness data.                                                                                                                                                                      | NR                          |
| Measurement and valuation of 12 preference based outcomes | 12      | If applicable, describe the population and methods used to elicit preferences for outcomes.                                                                                                                                                                                                                          | NR                          |
| Estimating resources and costs                            | 13a     | Single study-based economic evaluation: Describe approaches used to estimate resource use associated with the alternative interventions. Describe primary or secondary research methods for valuing each resource item in terms of its unit cost. Describe any adjustments made to approximate to opportunity costs. | P.6-7 / L.34-31             |

|                                                                      |     |                                                                                                                                                                                                                                                                                                                                                       |                 |
|----------------------------------------------------------------------|-----|-------------------------------------------------------------------------------------------------------------------------------------------------------------------------------------------------------------------------------------------------------------------------------------------------------------------------------------------------------|-----------------|
|                                                                      | 13b | Model-based economic evaluation: Describe approaches and data sources used to estimate resource use associated with model health states. Describe primary or secondary research methods for valuing each resource item in terms of its unit cost. Describe any adjustments made to approximate to opportunity costs.                                  | NR              |
| Currency, price date, and conversion                                 | 14  | Report the dates of the estimated resource quantities and unit costs. Describe methods for adjusting estimated unit costs to the year of reported costs if necessary. Describe methods for converting costs into a common currency base and the exchange rate.                                                                                        | NR              |
| Choice of model                                                      | 15  | Describe and give reasons for the specific type of decision-analytical model used. Providing a figure to show model structure is strongly recommended.                                                                                                                                                                                                | NR              |
| Assumptions                                                          | 16  | Describe all structural or other assumptions underpinning the decision-analytical model.                                                                                                                                                                                                                                                              | Table S2-S8     |
| Analytical methods                                                   | 17  | Describe all analytical methods supporting the evaluation. This could include methods for dealing with skewed, missing, or censored data; extrapolation methods; methods for pooling data; approaches to validate or make adjustments (such as half cycle corrections) to a model; and methods for handling population heterogeneity and uncertainty. | NR              |
| <b>Results</b>                                                       |     |                                                                                                                                                                                                                                                                                                                                                       |                 |
| Study parameters                                                     | 18  | Report the values, ranges, references, and, if used, probability distributions for all parameters. Report reasons or sources for distributions used to represent uncertainty where appropriate. Providing a table to show the input values is strongly recommended.                                                                                   | Table S1-S8     |
| Incremental costs and outcomes                                       | 19  | For each intervention, report mean values for the main categories of estimated costs and outcomes of interest, as well as mean differences between the comparator groups. If applicable, report incremental cost-effectiveness ratios.                                                                                                                | NR              |
| Characterising uncertainty                                           | 20a | Single study-based economic evaluation: Describe the effects of sampling uncertainty for the estimated incremental cost and incremental effectiveness parameters, together with the impact of methodological assumptions (such as discount rate, study perspective).                                                                                  | NR              |
|                                                                      | 20b | Model-based economic evaluation: Describe the effects on the results of uncertainty for all input parameters, and uncertainty related to the structure of the model and assumptions.                                                                                                                                                                  | NR              |
| Characterising heterogeneity                                         | 21  | If applicable, report differences in costs, outcomes, or cost-effectiveness that can be explained by variations between subgroups of patients with different baseline characteristics or other observed variability in effects that are not reducible by more information.                                                                            | NR              |
| <b>Discussion</b>                                                    |     |                                                                                                                                                                                                                                                                                                                                                       |                 |
| Study findings, limitations, generalisability, and current knowledge | 22  | Summarise key study findings and describe how they support the conclusions reached. Discuss limitations and the generalisability of the findings and how the findings fit with current knowledge.                                                                                                                                                     | P.13-17 / L.1-3 |



---

**Other**

---

|                      |    |                                                                                                                                                                                                                                                   |                |
|----------------------|----|---------------------------------------------------------------------------------------------------------------------------------------------------------------------------------------------------------------------------------------------------|----------------|
| Source of funding    | 23 | Describe how the study was funded and the role of the funder in the identification, design, conduct, and reporting of the analysis. Describe other non-monetary sources of support.                                                               | P.20 / L.14-16 |
| Conflict of interest | 24 | Describe any potential for conflict of interest of study contributors in accordance with journal policy. In the absence of a journal policy, we recommend authors comply with International Committee of Medical Journal Editors recommendations. | P.20 / L.10-12 |

---

For peer review only

# BMJ Open

## Economics of Primary Healthcare: Cost Estimation of Clinical Services at Primary Care Facilities in The Six Countries of The Gulf Cooperation Council.

|                                 |                                                                                                                                                                                                                                                                                                                                                                                                                                                                                                                                                                                                                                                                                                                                                                                                                                                                                                                                                                                                                                                                                                                                                                                                                                                                                                                                                                                                                                                                                                                   |
|---------------------------------|-------------------------------------------------------------------------------------------------------------------------------------------------------------------------------------------------------------------------------------------------------------------------------------------------------------------------------------------------------------------------------------------------------------------------------------------------------------------------------------------------------------------------------------------------------------------------------------------------------------------------------------------------------------------------------------------------------------------------------------------------------------------------------------------------------------------------------------------------------------------------------------------------------------------------------------------------------------------------------------------------------------------------------------------------------------------------------------------------------------------------------------------------------------------------------------------------------------------------------------------------------------------------------------------------------------------------------------------------------------------------------------------------------------------------------------------------------------------------------------------------------------------|
| Journal:                        | <i>BMJ Open</i>                                                                                                                                                                                                                                                                                                                                                                                                                                                                                                                                                                                                                                                                                                                                                                                                                                                                                                                                                                                                                                                                                                                                                                                                                                                                                                                                                                                                                                                                                                   |
| Manuscript ID                   | bmjopen-2023-079332.R2                                                                                                                                                                                                                                                                                                                                                                                                                                                                                                                                                                                                                                                                                                                                                                                                                                                                                                                                                                                                                                                                                                                                                                                                                                                                                                                                                                                                                                                                                            |
| Article Type:                   | Original research                                                                                                                                                                                                                                                                                                                                                                                                                                                                                                                                                                                                                                                                                                                                                                                                                                                                                                                                                                                                                                                                                                                                                                                                                                                                                                                                                                                                                                                                                                 |
| Date Submitted by the Author:   | 25-Apr-2024                                                                                                                                                                                                                                                                                                                                                                                                                                                                                                                                                                                                                                                                                                                                                                                                                                                                                                                                                                                                                                                                                                                                                                                                                                                                                                                                                                                                                                                                                                       |
| Complete List of Authors:       | <p>Elmusharaf, Khalifa; University of Birmingham Dubai, Public Health Poix, Sébastien; University of Limerick, School of Medicine Grafton, Daniel; United Nations Development Programme, Health and Development<br/> Jung, Johanna; United Nations Development Programme, Health and Development<br/> Gribble, Rebecca; United Nations Development Programme, Health and Development<br/> Stanton, Rachael; United Nations Development Programme, Health and Development<br/> Mahmoud, Lamia; World Health Organisation Regional Office for the Eastern Mediterranean<br/> Al Asfoor, Deena; World Health Organisation Regional Office for the Eastern Mediterranean, Health systems/ UHS<br/> Alawadi, Tayba; United Arab Emirates Ministry of Health &amp; Prevention<br/> Mustafa, Mohammed; United Arab Emirates Ministry of Health &amp; Prevention<br/> Shuwaiter, Lulwa; Kingdom of Bahrain Ministry of Health<br/> Alsuwaidan, Mohammed S.; Saudi Arabia Ministry of Health<br/> Al-Abri, Zahir; Government of Oman Ministry of Health<br/> Al-Sabahi, Sultana; Government of Oman Ministry of Health<br/> Fadda, Sherif; Primary Health Care Corporation<br/> Syed, Hassan Raza; Primary Health Care Corporation<br/> Almutairi, Muneera; Kuwait Ministry of Health<br/> Al-Farsi, Yahya; Sultan Qaboos University, College of Medicine &amp; Health Sciences<br/> Banatvala, Nicholas; World Health Organization<br/> Tarlton, Dudley; United Nations Development Programme, Health and Development</p> |
| <b>Primary Subject Heading</b>: | Health economics                                                                                                                                                                                                                                                                                                                                                                                                                                                                                                                                                                                                                                                                                                                                                                                                                                                                                                                                                                                                                                                                                                                                                                                                                                                                                                                                                                                                                                                                                                  |
| Secondary Subject Heading:      | Global health, Public health, Health policy                                                                                                                                                                                                                                                                                                                                                                                                                                                                                                                                                                                                                                                                                                                                                                                                                                                                                                                                                                                                                                                                                                                                                                                                                                                                                                                                                                                                                                                                       |
| Keywords:                       | HEALTH ECONOMICS, PUBLIC HEALTH, Primary Health Care, Health policy < HEALTH SERVICES ADMINISTRATION & MANAGEMENT                                                                                                                                                                                                                                                                                                                                                                                                                                                                                                                                                                                                                                                                                                                                                                                                                                                                                                                                                                                                                                                                                                                                                                                                                                                                                                                                                                                                 |
|                                 |                                                                                                                                                                                                                                                                                                                                                                                                                                                                                                                                                                                                                                                                                                                                                                                                                                                                                                                                                                                                                                                                                                                                                                                                                                                                                                                                                                                                                                                                                                                   |

1  
2  
3  
4  
5  
6  
7  
8  
9  
10  
11  
12  
13  
14  
15  
16  
17  
18  
19  
20  
21  
22  
23  
24  
25  
26  
27  
28  
29  
30  
31  
32  
33  
34  
35  
36  
37  
38  
39  
40  
41  
42  
43  
44  
45  
46  
47  
48  
49  
50  
51  
52  
53  
54  
55  
56  
57  
58  
59  
60





I, the Submitting Author has the right to grant and does grant on behalf of all authors of the Work (as defined in the below author licence), an exclusive licence and/or a non-exclusive licence for contributions from authors who are: i) UK Crown employees; ii) where BMJ has agreed a CC-BY licence shall apply, and/or iii) in accordance with the terms applicable for US Federal Government officers or employees acting as part of their official duties; on a worldwide, perpetual, irrevocable, royalty-free basis to BMJ Publishing Group Ltd ("BMJ") its licensees and where the relevant Journal is co-owned by BMJ to the co-owners of the Journal, to publish the Work in this journal and any other BMJ products and to exploit all rights, as set out in our [licence](#).

The Submitting Author accepts and understands that any supply made under these terms is made by BMJ to the Submitting Author unless you are acting as an employee on behalf of your employer or a postgraduate student of an affiliated institution which is paying any applicable article publishing charge ("APC") for Open Access articles. Where the Submitting Author wishes to make the Work available on an Open Access basis (and intends to pay the relevant APC), the terms of reuse of such Open Access shall be governed by a Creative Commons licence – details of these licences and which [Creative Commons](#) licence will apply to this Work are set out in our licence referred to above.

Other than as permitted in any relevant BMJ Author's Self Archiving Policies, I confirm this Work has not been accepted for publication elsewhere, is not being considered for publication elsewhere and does not duplicate material already published. I confirm all authors consent to publication of this Work and authorise the granting of this licence.

# Economics of Primary Healthcare: Cost Estimation of Clinical Services at Primary Care Facilities in The Six Countries of The Gulf Cooperation Council.

Khalifa Elmusharaf, Sébastien Poix, Daniel Grafton, Johanna Jung, Rebecca Gribble, Rachael Stanton, Lamia Mahmoud, Deena Alasfoor, Tayba Alawadi, Mohammed Mustafa, Lulwa Shuwaiter, Mohamed Alsuwaidan, Zahir Al-Abri, Sultana Al-Sabahi, Sherif Fiddah, Hassan Raza Syed, Muneera Almutairi, Yahya Al-Farsi, Nicholas Banatvala, Dudley Tarlton

## Authors

|     |                     |                                                                         |                               |
|-----|---------------------|-------------------------------------------------------------------------|-------------------------------|
| 1.  | Khalifa Elmusharaf  | University of Birmingham Dubai                                          | k.elmusharaf@outlook.com      |
| 2.  | Sébastien Poix      | University of Limerick                                                  | sebastien.poix@ul.ie          |
| 3.  | Daniel Grafton      | United Nations Development Programme                                    | daniel.grafton@undp.org       |
| 4.  | Johanna S Jung      | United Nations Development Programme                                    | johanna.jung@undp.org         |
| 5.  | Rebecca Gribble     | United Nations Development Programme                                    | rebecca.gribble@undp.org      |
| 6.  | Rachael Stanton     | United Nations Development Programme                                    | rachael.stanton@undp.org      |
| 7.  | Lamia Mahmoud       | World Health Organisation Regional Office for the Eastern Mediterranean | mahmoudl@who.int              |
| 8.  | Deena Alasfoor      | World Health Organisation Regional Office for the Eastern Mediterranean | alasfoord@who.int             |
| 9.  | Tayba Alawadi       | United Arab Emirates Ministry of Health & Prevention                    | Tayba.Alawadi@mohap.gov.ae    |
| 10. | Mohammed Mustafa    | United Arab Emirates Ministry of Health & Prevention                    | mohammed.mustafa@mohap.gov.ae |
| 11. | Lulwa Showaiter     | Kingdom of Bahrain Ministry of Health                                   | lshowaiter@health.gov.bh      |
| 12. | Mohammed Alsuwaidan | Saudi Arabia Ministry of Health                                         | malsuwaidan@moh.gov.sa        |
| 13. | Zahir Al-Abri       | Government of Oman Ministry of Health                                   | zaherabri50@hotmail.com       |
| 14. | Sultana Al-Sabahi   | Government of Oman Ministry of Health                                   | al-sabahis@hotmail.com        |
| 15. | Sherif Fadda        | Primary Health Care Corporation, Qatar                                  | sfadda@phcc.gov.qa            |
| 16. | Hassan Raza Syed    | Primary Health Care Corporation, Qatar                                  | hsyed@phcc.gov.qa             |
| 17. | Muneera Almutairi   | Ministry of Health, Kuwait                                              | dr_mmmj@hotmail.com           |
| 18. | Yahya M. Al-Farsi   | Sultan Qaboos University                                                | ymfarsi@squ.edu.om            |
| 19. | Nicholas Banatvala  | World Health Organisation                                               | banatvalan@who.int            |
| 20. | Dudley Tarlton      | United Nations Development Programme                                    | dudley.tarlton@undp.org       |

## Corresponding Author:

Sébastien Poix  
 University of Limerick, School of Medicine  
 Limerick, Ireland  
 sebastien.poix@ul.ie

## ABSTRACT

**Objective.** While the Gulf Cooperation Council (GCC) countries have demonstrated a strong commitment to strengthening primary healthcare (PHC), the costs of delivering these services in this region remain relatively unexplored. Understanding the costs of PHC delivery is essential for effective resource allocation and health system efficiency.

**Design.** We used an ingredient-based method to estimate the cost of delivering a selection of services at PHC facilities in the six GCC countries in 2019. Services were categorized into eight programmes: immunisation; non-communicable diseases (NCDs); oral and dental care; child health; nutrition; mental health; reproductive, maternal, neonatal, and child health; and general practice. The cost estimation focused on two key ingredients: the costs of drugs and supplies, and the healthcare workforce cost. The coverage rates of specific types of health services, including screening and mental health services, were also estimated. Data for the analysis was obtained from ministries of health, health statistics reports, online databases, national surveys, and scientific literature.

**Results.** The estimated costs of delivering the selected services at public PHC facilities in the six GCC countries totalled US\$5.7 billion in 2019, representing 0.34% of the combined 2019 GDP. The per capita costs varied from US\$69 to US\$272. General practice and NCD programs constituted 79% of the total costs modelled, while mental health ranged between 0.0% and 0.3%. Over 8 million individuals did not receive NCD screening services, and over 30 million did not receive needed mental health services in public PHC facilities across the region.

**Conclusions.** To our knowledge, this is the first study to estimate the costs of services delivered at PHC facilities in the GCC countries. Identifying the main cost drivers and the services which individuals did not receive can be used to help strengthen PHC to improve efficiency and scale up needed services for better health outcomes.

**Keywords:** health economics, health services research, health systems

1  
2  
3  
4  
5  
6  
7  
8  
9  
10  
11  
12  
13  
14  
15  
16  
17  
18  
19  
20  
21  
22  
23  
24  
25  
26  
27  
28  
29  
30  
31  
32  
33  
34  
35  
36  
37  
38  
39  
40  
41  
42  
43  
44  
45  
46  
47  
48  
49  
50  
51  
52  
53  
54  
55  
56  
57  
58  
59  
60

## 1 STRENGTHS AND LIMITATIONS OF THIS STUDY

- 2
  - 3
  - 4
  - 5
  - 6
  - 7
  - 8
  - 9
  - 10
  - 11
  - 12
  - 13
  - 14
  - 15
  - 16
  - 17
  - 18
  - 19
  - 20
  - 21
  - 22
  - 23
  - 24
  - 25
  - 26
  - 27
  - 28
  - 29
  - 30
  - 31
  - 32
  - 33
  - 34
  - 35
  - 36
  - 37
  - 38
  - 39
  - 40
  - 41
  - 42
  - 43
  - 44
  - 45
  - 46
  - 47
  - 48
  - 49
  - 50
  - 51
  - 52
  - 53
  - 54
  - 55
  - 56
  - 57
  - 58
  - 59
  - 60
- 4 ▪ The selection of services and the data collection phase were conducted in collaboration with the Ministries of Health in the six Gulf Countries.
  - 7 ▪ The study estimated the cost of delivering a limited number of services, which only reflects part of the expenditure incurred at the primary healthcare level.
  - 10 ▪ Due to variations in terms of services delivered, healthcare structure, public-private balance, and population demographics, comparative assessments must be approached cautiously.

## 1 INTRODUCTION

2  
3  
4  
5  
6  
7  
8  
9  
10  
11  
12  
13  
14  
15  
16  
17  
18  
19  
20  
21  
22  
23  
24  
25  
26  
27  
28  
29  
30  
31  
32  
33  
34  
35  
36  
37  
38  
39  
40  
41  
42  
43  
44  
45  
46  
47  
48  
49  
50  
51  
52  
53  
54  
55  
56  
57  
58  
59  
60

1  
2  
3  
4  
5  
6  
7  
8  
9  
10  
11  
12  
13  
14  
15  
16  
17  
18  
19  
20  
21  
22  
23  
24  
25  
26  
27  
28  
29  
30  
31  
32  
33  
34  
35  
36  
37  
38  
39  
40  
41  
42  
43  
44  
45  
46  
47  
48  
49  
50  
51  
52  
53  
54  
55  
56  
57  
58  
59  
60

Primary healthcare (PHC) refers to the first point of contact for individuals seeking medical care, but it also encompasses health education, prevention, and promotion(1). From an economic perspective, investing in primary care is cost-effective, as its focus on preventive measures and early interventions results in reduced disease burden, which translates into overall population health, increased productivity and lower healthcare costs(1-3). For instance, early detection and management of chronic conditions, such as non-communicable diseases (NCDs), can prevent costly hospitalisations or visits to emergency departments(1). Additionally, primary care providers can often provide care for a broader range of conditions than specialists, reducing the need for referrals and associated costs.

In 2018, 40 years after the Alma-Ata Declaration, the Astana Declaration renewed the global commitment to PHC and reaffirmed its importance as the foundation of healthcare systems(4). The Astana Declaration called for increased investment in PHC to strengthen health systems, achieve health-related Sustainable Development Goals, and attain universal health coverage.

Global demographics are changing, with ageing populations, population growth, as well as increasing health literacy, greater access to technology, and public expectations of health services leading to increased demand for healthcare, both globally and in the Eastern Mediterranean Region(5). These changes, along with an epidemiological shift from communicable towards non-communicable diseases(6-11), are influencing the transformation of PHC delivery. It is estimated that 90% of all health needs can be met at the PHC level, offering countries a clear path forward in improving health outcomes and health system efficiency(12).

The WHO Eastern Mediterranean Region has a long history of strengthening PHC, demonstrated by all countries in the region endorsing the Qatar Declaration on Primary Healthcare in 2008(12). This commitment to strengthening primary level-based health systems is growing, with a particular focus on family practice as one of the means of achieving universal health coverage (UHC). More recently, WHO EMRO has supported its Member States in the development of PHC-oriented models of care.

Understanding the cost of PHC components can help countries identify practical financing and allocation solutions to direct investment towards areas that reduce costs, such as medical supplies and health personnel training, ultimately enhancing the continuity, efficiency, and quality of health services to meet increasing demand in the Gulf region.

This study had two aims. First, to estimate and compare the costs of delivering a selection of PHC services in the six countries of the Gulf Cooperation Council (GCC) in 2019: Bahrain, Kuwait, Oman, Qatar, Saudi



1  
2  
3  
4  
5  
6  
7  
8  
9  
10  
11  
12  
13  
14  
15  
16  
17  
18  
19  
20  
21  
22  
23  
24  
25  
26  
27  
28  
29  
30  
31  
32  
33  
34  
35  
36  
37  
38  
39  
40  
41  
42  
43  
44  
45  
46  
47  
48  
49  
50  
51  
52  
53  
54  
55  
56  
57  
58  
59  
60

1 Arabia (KSA) and the United Arab Emirates (UAE). Second, to estimate the coverage rates of specific types  
2 of health services, including screening and mental health services.

For peer review only

## METHODS

### Scope of the study

This study estimates the cost of delivering a selection of services at PHC facilities in the public sector arranged under eight different programmes: (1) immunisation; (2) NCDs; (3) oral and dental care; (4) child health; (5) nutrition; (6) mental health; (7) reproductive, maternal, neonatal and child health; and (8) general practice. The categorisation of services within each program was initially based on the classification used in the OneHealth Tool Costing Module(13). However, to ensure relevance to the local context and healthcare priorities of each GCC country, this classification was further refined through collaboration with focal points from the Ministries of Health. General practice was included as an additional program to better reflect the volume and nature of services delivered at the public primary healthcare level. In this study, general practice refers to general consultations conducted by General Practitioners (GPs), which include a wide range of preventive and curative medical services, such as acute pain management, infectious diseases treatment, or health promotion and prevention. The scope of the general practice program was defined based on data retrieved from the annual health statistics reports of each selected country. As a result of this collaborative and iterative approach, the services included in this analysis slightly vary from country to country. The services included for each country can be found in the supplemental materials (Supplemented Material 1).

### Patient and Public Involvement

Patients and/or the public were not involved in the design, conduct, reporting or dissemination plans of this research.

### Data sources

Demographic data were obtained from official population censuses or estimates(14-18). Disease prevalence and incidence were obtained from annual health statistics reports(19-22), national surveys, international or national databases, and local and regional literature. The number of services delivered was obtained from the focal persons from the health ministry or annual health statistics reports. When unavailable, we used proxy indicators or made assumptions based on regional and international literature. The costs of drugs and supplies and staff time requirements were extracted from the OneHealth Tool Costing Module(13), except for Qatar where standard drugs and supplies costs were completed by actual costs provided by the Primary Health Care Corporation (PHCC). However, the costs estimated in this study for Qatar remain lower than those reported by PHCC finance department due to the limited number of services included and the fact that our calculations focus solely on direct service delivery costs. Healthcare providers' annual salaries were obtained from the OneHealth Tool Costing Module(13) or the focal persons from the health ministry. When a clinical service not included in the initial list was added by the country,

1 we estimated the drugs and supply costs and staff time requirements using data from the WHO-CHOICE  
2 database, WHO's review of vaccine price data(23), and relevant national reports or guidelines. The  
3 assumptions used in the model are presented in the supplemental materials (Supplemental Material 2 and  
4 3).

#### 5 6 **Cost calculation model**

7  
8 We used an ingredient costing method to estimate the costs of a selection of services delivered at public  
9 PHC. This method consists of estimating the cost of producing a healthcare service by breaking down the  
10 total cost into the cost of individual ingredients or components, such as labour, equipment, materials, and  
11 supplies. In this analysis, the cost of one clinical service was calculated as follows:  $TC=C_s \times N_s$ . Where  $TC$  is  
12 the total cost,  $C_s$  is the cost per service, and  $N_s$  is the number of services delivered in one given year. The  
13 two components used in this formula are described below.

14 The cost per service was obtained as follows:  $C_s=DSc+Lc$ . Where  $DSc$  is the drugs and supply costs, and  $Lc$   
15 is the labour cost. The labour cost was calculated by multiplying the number of minutes spent by each  
16 healthcare worker involved in delivering a service by their salary per minute. We estimated the salary per  
17 minute using staff time requirements from the OneHealth Tool Costing Module, as well as annual salaries  
18 and working time assumptions (working days per year, working hours per day) validated by the focal  
19 persons in each country. Using this approach, we only monetised the fraction of time directly employed on  
20 delivering the services. Therefore, we did not consider the time spent by the healthcare providers on non-  
21 clinical activities, such as training or coordination. Moreover, we accounted for overhead costs such as  
22 training, programme management, supervision, monitoring and evaluation, communication, infrastructure  
23 and equipment, transportation, and advocacy. Since there was no available information about the  
24 overhead costs necessary for running the selected services, an estimate equivalent to 20% of the total costs  
25 was agreed upon in consultation with the focal persons from the health ministry.

26 To determine the number of services delivered in a year, we primarily used data from the focal persons  
27 from the health ministry or obtained from annual health statistics reports. When the number of services  
28 delivered was unavailable, we used proxy indicators or estimates based on regional and international  
29 literature. When a coverage rate expressed in percentage was available, we estimated the corresponding  
30 number of services as follows:  $N_s = TP_s \times PIN_s \times CR_s$ . Where  $TP_s$  is the target population,  $PIN_s$  is the population  
31 in need, and  $CR_s$  is the coverage rate. The target population refers to the sub-population eligible for  
32 receiving a given service, and the population in need is the percentage of the target population who should  
33 receive a service in a year. The coverage rate refers to the percentage of the population in need who  
34 effectively received a service in the year. For example, if a population of 1,000,000 are eligible for receiving

1 a service, that 50% of them must receive it in a year, but that the coverage rate is 70%, the number of  
2 services delivered was estimated at 350,000, calculated as follows:  $350,000 = 1,000,000 \times 0.50 \times 0.70$ .

3  
4 Finally, when an indicator specified the number of individuals instead of the number of services delivered,  
5 we estimated the latter using treatment assumptions from the OneHealth Tool. For example, we assumed  
6 that an individual treated for an already established ischemic heart disease generated an average of six  
7 visits annually. The assumptions used in the model are presented in the supplemental materials  
8 (Supplemental Material 2 and 3).

#### 9 10 **Specific coverage rate estimation method**

11  
12 In this analysis, we also estimated the coverage rates for certain programmes (NCDs, mental health),  
13 disease types (diabetes, cardiovascular diseases, respiratory diseases), and intervention types (screening  
14 services). In this case, the coverage rates were calculated by dividing the aggregated number of individuals  
15 who received a set of selected services by the corresponding population in need. The results do not reflect  
16 the actual coverage rate at the country level since we did not consider the percentage of people who may  
17 have received similar services outside public PHC.

## RESULTS

### Cost of the selected primary healthcare services

The costs of the selected services delivered at the public PHC level across the six countries were estimated at US\$5.7 billion in 2019. Table 1 presents the total costs for each country, as well as the cost per capita and the share of these costs in the current health expenditures (CHE) and government health expenditures (GHE). The highest cost per capita was observed in Kuwait (US\$272.16), followed by Qatar (US\$199.68). While KSA has the lowest per capita cost (US\$68.60), the country has the highest overall cost, with an estimated US\$2.3 billion in 2019. Overall, the cost of the selected services represents 0.34% of the six countries' combined 2019 GDP.

**Table 1. Cost of the selected clinical services\***

|                                    | Bahrain | Kuwait  | Oman   | Qatar  | KSA     | UAE     |
|------------------------------------|---------|---------|--------|--------|---------|---------|
| <b>Total costs (US\$, Million)</b> | 159.7   | 1,203.0 | 298.8  | 558.9  | 2,347.4 | 1,180.3 |
| <b>Per capita cost (US\$)</b>      | 107.62  | 272.16  | 112.55 | 199.68 | 68.60   | 120.83  |
| <b>Total costs (% of CHE)</b>      | 10.3    | 16.3    | 9.6    | 12.7   | 5.2     | 6.6     |
| <b>Total costs (% of GHE)</b>      | 24.2    | 18.6    | 10.9   | 17.0   | 8.3     | 11.8    |
| <b>Total costs (% of GDP)</b>      | 0.41    | 0.88    | 0.34   | 0.32   | 0.28    | 0.28    |

\* The costs presented in this table include the 20% increase for overhead costs  
CHE = Current Health Expenditure, GHE= Government Health Expenditures

### Costs distribution

Table 2 shows the distribution of the costs disaggregated by programme. The costs related to general practice were the most prominent in five of the six countries (52.7-77.0%), while in Qatar the NCDs programme made up the largest share of total costs (57.4%). In the five other countries, the share of the NCDs programmes varied from 6.9% in Bahrain to 19.8% in the UAE. The child health programme is another significant cost driver that accounts for between 4.2% (KSA) to 20.3% (Bahrain) of the total costs. Taken altogether, these three programmes represent 80.0-93.3% of the costs modelled in the six countries. The mental health programme had the lowest costs across all six countries, with between 0.0% (Bahrain, Oman) and 0.3% (UAE) of the costs modelled in the study.

**Table 2. Cost of the selected clinical services disaggregated by programme in 2019 (US\$, Million)\***

|                         | Bahrain     | Kuwait       | Oman         | Qatar        | KSA            | UAE          |
|-------------------------|-------------|--------------|--------------|--------------|----------------|--------------|
| <b>General practice</b> | <b>77.7</b> | <b>610.4</b> | <b>130.5</b> | <b>109.1</b> | <b>1,445.7</b> | <b>497.1</b> |

|                             |              |              |              |              |                |                |
|-----------------------------|--------------|--------------|--------------|--------------|----------------|----------------|
| % of total costs            | 60.8         | 63.4         | 54.6         | 24.4         | 77.0           | 52.7           |
| <b>NCDs</b>                 | <b>8.8</b>   | <b>109.3</b> | <b>36.0</b>  | <b>256.5</b> | <b>189.8</b>   | <b>187.2</b>   |
| % of total costs            | 6.9          | 11.4         | 15.1         | 57.4         | 10.1           | 19.8           |
| <b>Child health</b>         | <b>26.0</b>  | <b>162.0</b> | <b>44.8</b>  | <b>51.4</b>  | <b>79.1</b>    | <b>177.9</b>   |
| % of total costs            | 20.3         | 16.8         | 18.7         | 11.5         | 4.2            | 18.8           |
| <b>Immunisation</b>         | <b>3.7</b>   | <b>10.9</b>  | <b>10.1</b>  | <b>14.9</b>  | <b>75.0</b>    | <b>20.6</b>    |
| % of total costs            | 2.9          | 1.1          | 4.2          | 3.3          | 4.0            | 2.2            |
| <b>Oral and dental care</b> | <b>4.5</b>   | <b>41.3</b>  | <b>6.1</b>   | <b>5.0</b>   | <b>25.3</b>    | <b>30.2</b>    |
| % of total costs            | 3.6          | 4.3          | 2.5          | 1.1          | 1.3            | 3.2            |
| <b>Nutrition</b>            | <b>4.5</b>   | <b>16.0</b>  | <b>6.6</b>   | <b>2.2</b>   | <b>25.2</b>    | <b>3.5</b>     |
| % of total costs            | 3.5          | 1.7          | 2.8          | 0.5          | 1.3            | 0.4            |
| <b>RMCH</b>                 | <b>2.5</b>   | <b>11.8</b>  | <b>5.0</b>   | <b>7.7</b>   | <b>36.5</b>    | <b>25.1</b>    |
| % of total costs            | 1.9          | 1.2          | 2.1          | 1.7          | 1.9            | 2.7            |
| <b>Mental health</b>        | <b>0.1</b>   | <b>0.8</b>   | <b>0.0</b>   | <b>0.5</b>   | <b>1.2</b>     | <b>2.7</b>     |
| % of total costs            | <0.01        | 0.1          | 0.0          | 0.1          | 0.1            | 0.3            |
| <b>Total</b>                | <b>127.8</b> | <b>962.5</b> | <b>239.1</b> | <b>447.3</b> | <b>1,877.9</b> | <b>1,180.3</b> |

\* The costs presented in this table do not include the 20% increase for overhead costs

### Non-communicable diseases

The costs of the clinical services related to diabetes, cardiovascular diseases and chronic respiratory diseases (asthma and chronic obstructive pulmonary diseases) were estimated at US\$676 million in 2019 across all six countries (Table 3). As these diseases are three of the major NCDs, we sought to understand the cost burden associated with managing and treating them. Based on the coverage rates and populations in need, we estimated that 14,911,170 individuals did not receive the services they needed at public PHC facilities in 2019.

**Table 3. Cost of clinical services provided and estimated number of patients who did not receive services needed at the public PHC level for diabetes, cardiovascular and respiratory diseases**

|                 | Cost (US\$, Million)* | % of total costs | Estimated number of patients who did not receive the services needed at the public PHC level |
|-----------------|-----------------------|------------------|----------------------------------------------------------------------------------------------|
| <b>Bahrain</b>  | 5.03                  | 3.9%             | 284,410                                                                                      |
| <b>Kuwait</b>   | 102.75                | 10.7%            | 947,920                                                                                      |
| <b>Oman**</b>   | 32.27                 | 13.5%            | 376,910                                                                                      |
| <b>Qatar***</b> | 254.44                | 56.9%            | 1,458,590                                                                                    |
| <b>KSA</b>      | 108.07                | 5.8%             | 9,950,800                                                                                    |
| <b>UAE</b>      | 173.16                | 18.3%            | 1,892,540                                                                                    |

|              |        |  |            |
|--------------|--------|--|------------|
| <b>Total</b> | 675.72 |  | 14,911,170 |
|--------------|--------|--|------------|

\* The costs presented in this table do not include the 20% increase for overhead costs

\*\* Coverage rate was calculated considering Omani nationals only.

\*\*\* In Qatar, costing data was directly provided by the Primary Healthcare Corporation (PHCC). Services delivered by other providers, such as the Red Crescent, were not included in the study.

## NCD screening services

Table 4 shows the costs and coverage rates of seven NCD screening services (screening for risk of cardiovascular diseases and diabetes, clinical breast examination, pap smear, faecal occult blood test, and screening for diabetes complications). The total cost of these screening services across all six countries was estimated at US\$18.1 million in 2019. In all countries, these costs account for less than 1% of the total costs modelled. Based on the coverage rates and populations in need, we estimated that 30,435,980 individuals did not receive the screening services they needed at public PHC facilities in 2019.

**Table 4. Cost and coverage rate for services provided and estimated number of patients who did not receive services needed at the public PHC level for screening services**

|                 | Cost (Million, US\$)* | % of total costs | Coverage rate (%) | Estimated number of patients who did not receive the services needed at the public PHC level |
|-----------------|-----------------------|------------------|-------------------|----------------------------------------------------------------------------------------------|
| <b>Bahrain</b>  | 0.9                   | 0.7%             | 6%                | 1,058,870                                                                                    |
| <b>Kuwait</b>   | 1.1                   | 0.1%             | 6%                | 3,184,360                                                                                    |
| <b>Oman**</b>   | 0.2                   | 0.1%             | 7%                | 953,920                                                                                      |
| <b>Qatar***</b> | 2.0                   | 0.5%             | 4%                | 1,445,050                                                                                    |
| <b>KSA</b>      | 5.8                   | 0.3%             | 5%                | 18,912,380                                                                                   |
| <b>UAE</b>      | 8.1                   | 0.9%             | 5%                | 4,881,400                                                                                    |
| <b>Total</b>    | <b>18.1</b>           |                  |                   | <b>30,435,980</b>                                                                            |

\* The costs presented in this table do not include the 20% increase for overhead costs

\*\* Coverage rate was calculated considering Omani nationals only.

\*\*\* In Qatar, costing data was directly provided by the Primary Healthcare Corporation (PHCC). Services delivered by other providers, such as the Red Crescent, were not included in the study.

## Mental health services

The total cost of mental health services was estimated at US\$5.3 million in 2019 across all six countries (Table 5). These costs made up between 0.0% (Bahrain, Oman) and 0.3% (UAE) of the total costs modelled. Based on the coverage rates and populations in need, we estimated that 8,724,160 individuals did not receive the mental services they needed at public PHC facilities in 2019.

**Table 5. Cost and coverage rate for services provided and estimated number of patients who did not receive services needed at the public PHC level for mental health services**

|                 | Cost (Million, US\$)* | % of total costs | Coverage rate (%) | Estimated number of patients who did not receive the services needed at the public PHC level |
|-----------------|-----------------------|------------------|-------------------|----------------------------------------------------------------------------------------------|
| <b>Bahrain</b>  | 0.1                   | 0.0%             | 2%                | 206,090                                                                                      |
| <b>Kuwait</b>   | 0.8                   | 0.1%             | 8%                | 267,310                                                                                      |
| <b>Oman**</b>   | 0.0                   | 0.0%             | 0%                | 142,890                                                                                      |
| <b>Qatar***</b> | 0.5                   | 0.1%             | 2%                | 430,720                                                                                      |
| <b>KSA</b>      | 1.2                   | 0.1%             | 1%                | 6,993,490                                                                                    |
| <b>UAE</b>      | 2.7                   | 0.3%             | 4%                | 683,660                                                                                      |
| <b>Total</b>    | <b>5.3</b>            |                  |                   | 8,724,160                                                                                    |

\* The costs presented in this table do not include the 20% increase for overhead costs

\*\* Coverage rate was calculated considering Omani nationals only. Mental health services are not provided within primary care in Oman.

\*\*\* In Qatar, costing data was directly provided by the Primary Healthcare Corporation (PHCC). Services delivered by other providers, such as the Red Crescent, were not included in the study.



## DISCUSSION

This study aimed to estimate the cost of selected clinical services provided at public PHC facilities in the six countries of the GCC. By assessing the costs of delivering multiple programmes, including general practice, child health, immunisation, oral and dental care, nutrition, reproductive, maternal, neonatal and child health, and mental health at the public PHC level, this study underscores the importance of strengthening the public PHC and provide policymakers with crucial cost estimates to inform resource allocation and strategic planning for achieving improved health outcomes. This research, the first of this kind in the region, also highlights the significance of conducting tailored assessments that take into account the diverse healthcare landscapes of countries. Furthermore, our findings offer a foundation for future comparative analyses, fostering a deeper understanding of global variations in PHC financing. The findings indicate that the cost of selected services across eight programmes exceeded US\$5.7 billion in 2019. While these costs represent 0.34% of the combined GDP in 2019, WHO recommends that countries allocate at least 1% of their GDP to PHC(24). It is crucial to note that the estimated costs in our study do not encompass the entirety of PHC expenditures, making it challenging to assess our results in relation to WHO's recommendation. We observed significant variations in per capita cost, with KSA having the lowest (US\$68) and Kuwait having the highest (US\$217) cost. We attribute these variations to different reasons. Firstly, each country has a unique health system, which includes varying proportions of private care delivery and different healthcare delivery organisation(25-30). According to the latest data from the World Bank, the percentage of domestic general government health expenditure relative to total current health expenditure varied markedly across the six countries in 2019, ranging from 61% in the United Arab Emirates to 90% in Oman(31). Secondly, the differences in population structure may also affect the costs of these services. The diverse demographic profiles of the six countries may influence the prevalence of certain health conditions, the demand for specific services, and the overall utilisation of PHC. For instance, Saudi Arabia has a higher proportion of its population aged less than 19, while the UAE has a larger working-age population(32). These variations in population structure have implications for healthcare demand, notably regarding NCDs. Another element to consider is the differences in the proportion of non-nationals across the six countries(33). In the UAE and Qatar, the population is predominantly composed of non-nationals, whereas KSA has a majority of nationals. To address this particularity, countries have established unique health coverage mechanisms, creating variations in PHC utilisation(34). Lastly, these variations also result from differences in what interventions are delivered at the PHC level as opposed to other healthcare system levels, as well as coverage rates. While these factors demonstrate the complexity of comparing the cost of clinical services delivered at PHC facilities, this study allowed us to identify the main cost drivers and make recommendations. A study conducted in Indonesia in 2020 shares some methodological similarities with this one(35). This study aimed to estimate the costs of reaching national health targets at the primary healthcare level between 2020-2024 using the OneHealth Tool. Nevertheless, a direct comparison between the two studies remains challenging due to significant variations in interventions and

1  
2  
3 1 programmes, and the more comprehensive costing approach used by the Indonesian study. These  
4 2 differences highlight the nuanced nature of primary healthcare costing, emphasising the need for context-  
5 3 specific assessments tailored to the unique healthcare landscapes of individual regions or countries.  
6  
7  
8 4

9 5 Generally, the services classified under general practice were the main drivers of the total costs in all  
10 6 countries, followed by services related to preventing, treating, and managing NCDs. The large share of  
11 7 general practice in the total costs can be explained by the many services included within this programme.  
12 8 Costs of services related to NCDs are likely due to the substantial per-patient costs associated with  
13 9 managing these diseases, their chronic nature, and their high prevalence, particularly diabetes,  
14 10 cardiovascular and respiratory diseases, in the six countries. A previous study found that NCDs killed nearly  
15 11 43,000 people in the Gulf countries in 2019 and generated an economic burden estimated at around US\$50  
16 12 billion, equivalent to 3.3% of the GDP(36). We observed noticeable differences in the proportion of NCD-  
17 13 related costs in the six countries. These differences may stem from various factors, such as the varying  
18 14 proportion of individuals receiving these services in the private healthcare sector or a form of overlapping  
19 15 between the services provided in specialised clinics and general practice. We also observed that the share  
20 16 of costs associated with these services is significantly higher in Qatar (57.4%) than in the five other  
21 17 countries, where it ranges from 6.9% to 19.8%. This factor could be attributed to Qatar being the only  
22 18 country where actual drugs and supplies costs were used in this analysis. Indeed, the actual unit costs  
23 19 provided by Qatar were significantly higher than those extracted from the OneHealth Tool, which were  
24 20 used for the remaining five countries. This suggests that the overall costs for these countries may have  
25 21 been underestimated. However, this could not be verified with the other countries. The substantial  
26 22 contribution of NCD-related services to the total costs modelled also reflects a shift of healthcare demands  
27 23 towards NCDs that countries have been experiencing over the past decades. The GCC countries have made  
28 24 significant strides in the prevention and control of NCDs, most of them having multisectoral coordination  
29 25 mechanisms, comprehensive strategies and targeted programmes(36). For example, the UAE launched 42  
30 26 NCD clinics between 2017 and 2018 and trained PHC staff in the early detection and management of  
31 27 NCDs(37). Our findings also indicate that mental health services made up between 0.0% and 0.3% of the  
32 28 costs of the selected services. A few countries have taken commendable steps to respond to the increasing  
33 29 prevalence of mental health conditions, such as Bahrain, which established school mental health clinics,  
34 30 implemented a training programme for family physicians, and upgraded its guidelines for mental health(6).  
35 31 However, these programmes did not reach the same level of maturity as other NCD programmes, and  
36 32 ensuring better access to mental health services and reducing the stigma surrounding mental health  
37 33 conditions remain key challenges in the region.  
38  
39  
40  
41  
42  
43  
44  
45  
46  
47  
48  
49  
50  
51  
52  
53  
54  
55  
56  
57  
58  
59  
60

35 In terms of coverage, the study estimated that approximately 15 million people did not receive necessary  
36 NCDs-associated services, and around 9 million people did not receive necessary mental health services at

1  
2  
3 1 the public PHC level across all six countries in 2019. As the analysis only modelled the cost of services  
4 2 delivered at the public PHC level, individuals could have received these services in the private sector or at  
5 3 the secondary or tertiary level of the public sector. For example, around 67,000 mental health visits were  
6 4 recorded in Oman through extended healthcare centres in 2019(20), but none were included in our costing  
7 5 model.  
8  
9  
10  
11  
12

13 7 We estimated that, across the six countries, around 30 million people did not receive the NCD screening  
14 8 services they required in public PHC. This includes screening for cardiovascular diseases, cervical, breast  
15 9 and colorectal cancers, diabetes and diabetes complications. Additionally, we found that the coverage  
16 10 rates for these seven services were consistently low across the countries, ranging from an average of 4%  
17 11 in Qatar to 7% in Oman. While these results show relatively low access to screening services, they should  
18 12 be qualified by the consideration that screening and awareness-related activities are rarely directly  
19 13 captured in health statistics records and health surveys, making them difficult to estimate accurately.  
20  
21  
22  
23  
24  
25  
26

## 27 16 **Limitations**

28  
29 18 This study had some limitations which must be considered when interpreting the results. Firstly, the list of  
30 19 services included in this study did not include all PHC services. It is also important to note that the selection  
31 20 of services may inadvertently introduce a bias towards NCDs because of the greater representation of these  
32 21 services among those available in the OneHealth Tool Costing Module. To mitigate this potential risk, we  
33 22 actively engaged with the six Ministries of Health during the selection process, allowing them to include  
34 23 additional services. Even if a risk of bias remains, we considered the greater representation of NCD-related  
35 24 services to reflect the current activity and priorities of the public PHC in each country. Secondly, it is  
36 25 important to note that services included in the general practice programme could potentially overlap with  
37 26 other programmes. Challenges related to clearly delineating this programme in each of the six countries  
38 27 introduce uncertainty regarding the distribution of the costs per programme. Thirdly, the drugs and supply  
39 28 costs for each clinical service were estimated using cost assumptions from the OneHealth Tool Costing  
40 29 Module, except for Qatar where primary data was collected. Fourthly, service coverage data was not  
41 30 always available, which required making assumptions based on similar interventions or available data from  
42 31 neighbouring countries. The coverage rates must be interpreted with caution as they only reflect the  
43 32 number of services delivered at the public PHC level, and some services may also be delivered at other  
44 33 levels of the public health system and/or in the private sector. Moreover, without detailed information on  
45 34 the proportion of individuals utilising private care instead of public care, it becomes challenging to fully  
46 35 contextualise and evaluate the coverage rates. Fifthly, the study did not have information on overhead  
47 36 costs such as training, programme management, supervision, monitoring and evaluation, communication,  
48 37 infrastructure and equipment, transportation, and advocacy, and an estimation of 20% of the total costs  
49  
50  
51  
52  
53  
54  
55  
56  
57  
58  
59  
60

1 was agreed upon to account for this. Finally, comparisons between countries and with other published  
2 estimates of PHC spending should be made with caution due to differences in the number and nature of  
3 the clinical services included for each country, variations in the healthcare system and population structure,  
4 and different data sources used.

## 5 6 7 **Recommendations**

8  
9 The significance of robust PHC in establishing effective and efficient health systems is well acknowledged  
10 by all six GCC countries. They have made commendable strides in strengthening PHC by adapting to the  
11 evolving disease burden of their populations, as evident from the allocation of substantial costs to NCD  
12 services in this study. The comprehensive costing analysis presented in this report sheds light on specific  
13 areas where further enhancements in PHC services and resource allocation across the GCC countries can  
14 be made. To reap substantial health and economic advantages, the following recommended actions  
15 deserve consideration:

- 16  
17 1. **Strengthen the primary health workforce:** To address the shortage of skilled healthcare  
18 professionals in the primary care sector, the GCC countries should focus on increasing investment  
19 in training, attracting, and retaining local Family Physicians (FPs) and General Practitioners (GPs).  
20 This can be achieved through incentivising primary care training programmes, such as providing  
21 scholarships for nationals pursuing careers in primary care professions. Scaling up the primary  
22 health workforce will involve initial and ongoing training and remuneration costs, but the potential  
23 health and economic gains justify this investment.
- 24  
25 2. **Expand NCD prevention and screening services:** Investing in disease prevention and routine  
26 screening services at the public PHC level is vital for strong PHC. The GCC countries have an  
27 opportunity to scale up their screening services for NCDs in public PHC, as over 30 million people  
28 in the region did not receive the required NCD screening services in 2019. To assess coverage fully,  
29 further research into private sector service provision and primary care coverage in the GCC  
30 countries is recommended. Scale-up of PHC services should be done with a focus on accessibility,  
31 equity, and achieving universal health coverage.
- 32  
33 3. **Scale-up mental health services:** Despite progress in ensuring access to mental health services  
34 and reducing stigma, the majority of mental health services are still delivered at the secondary or  
35 tertiary level in the GCC region. Integrating mental health screening and care services into public  
36 PHC, especially in general practice, can improve accessibility and lead to better health outcomes  
37 compared to treatment at higher-level facilities. Scaling up mental health services at the PHC level

1  
2  
3 1 aligns with a people-centered approach to PHC that addresses health and disease  
4 2 comprehensively.  
5 3

6 3  
7 4  
8 4 **4. Enhance regional collaboration and policy coherence:** The GCC countries share common  
9 5 challenges and opportunities in strengthening PHC. Establishing a GCC PHC Coordination  
10 6 Committee with regular meetings to share best practices, lessons learned, and promote legislative  
11 7 action will support regional collaboration. The committee should focus on NCD prevention,  
12 8 screening, and treatment at the PHC level, and consider establishing a database to track progress  
13 9 and emerging challenges in NCD-related targets and indicators. Regional strategies and action  
14 10 plans should be developed to further promote policy coherence and collaboration.  
15 11

16 11  
17 12 **5. Invest in research and monitoring of PHC:** To improve the efficiency and health outcomes of PHC  
18 13 systems in the GCC region, there should be a focus on research and monitoring. By integrating an  
19 14 effectiveness perspective into this research, GCC countries could identify quick wins, as well as  
20 15 areas and services that require more resources or could be run more efficiently. Scaling up  
21 16 research and monitoring into PHC will provide a stronger evidence base and enable assessment of  
22 17 the impact of potential changes in PHC service delivery. Additionally, defining UHC health benefits  
23 18 packages will facilitate modelling costs associated with the included services.  
24 19

25 19  
26 20 By implementing these recommendations, the GCC countries can strengthen their PHC systems, leading to  
27 21 improved health outcomes and more efficient resource allocation. These actions will contribute to building  
28 22 effective and robust health systems that effectively address the changing disease burden of the population.  
29 23  
30 24

## CONCLUSION

To our knowledge, this study is the first that aimed to estimate the costs of services delivered at PHC in the GCC countries. The findings indicate that general practice, child health, and NCDs, particularly diabetes, cardiovascular and respiratory diseases, were the main cost drivers. This study also shows that, in all countries, a significant number of individuals didn't receive essential services, such as screening for NCDs or mental health services, at the public PHC level. Based on these results, we recommend actions to increase the availability and accessibility of prevention and screening services, integrate mental health screening and care services into primary care, and expand research and monitoring efforts on PHC investment, both in the public and private sectors.

**Abbreviations**

|      |                                |
|------|--------------------------------|
| FP   | Family Physician               |
| GCC  | Gulf Cooperation Council       |
| CHE  | Current Health Expenditures    |
| GHE  | Government Health Expenditures |
| KSA  | Kingdom of Saudi Arabia        |
| PHC  | Primary Healthcare             |
| PHCC | Primary Healthcare Corporation |
| NCD  | Non-Communicable Disease       |
| UAE  | United Arab Emirates           |
| UHC  | Universal Health Coverage      |
| WHO  | World Health Organization      |

## Acknowledgements

The authors express their sincere gratitude to the Ministries of Health in the GCC, the national teams that supported the data collection and analysis, and the stakeholders who took the time to review and improve this work. The publication also greatly benefited from the contributions of WHO and UNDP Regional Offices, Dr Elfatih Abdelraheem (UNDP), Dr Awad Mataria (WHO EMRO), Dr Hassan Salah (WHO EMRO), Dr Faraz Khalid (WHO), Dr Hicham El Berri (WHO EMRO), Dr Nasim Pourghazian (WHO EMRO), Dr Alexey Kulikov (UN Interagency Task Force on NCDs), and Dr Suleiman Aldakheel (Gulf Health Council).

## Competing Interests

The authors alone are responsible for the views expressed in this article, and they do not necessarily represent the views, decisions or policies of the institutions with which they are affiliated.

## Funders

This study received financial support from the Gulf Health Council for the Cooperation Council States (N/A).

**Twitter:** @elmusharaf1, @DudleyTarlton, @nickbanatvala

## Contributors

KE and SP substantially contributed to the conception, methodology development and data collection; conducted the data analysis, economic modelling and interpretation of data; and drafted the manuscript. DG, JJ, RG, and RS substantially contributed to the conception and design, literature search, data collection, interpretation of data and drafting of the manuscript. TA, MM, LS, MA, ZA, SA, SF, HRS, and MA contributed to data collection and interpretation of data and revised the article critically for important intellectual content. LM, DA, YA, NB, and DT contributed to the conception and design, provided guidance on scope and interpretation of results, and revised the article critically for important intellectual content. KE, SP and DG are responsible for the overall content as guarantors. All authors approved the version of the manuscript to be published.

## Data availability statement

All data relevant to the study are included in the article or uploaded as supplementary information.

## Ethics statements

Ethics approval was not required for this economic evaluation study. We used publicly accessible documents and data to conduct the economic analysis.



1  
2  
3  
4  
5  
6  
7  
8  
9  
10  
11  
12  
13  
14  
15  
16  
17  
18  
19  
20  
21  
22  
23  
24  
25  
26  
27  
28  
29  
30  
31  
32  
33  
34  
35  
36  
37  
38  
39  
40  
41  
42  
43  
44  
45  
46  
47  
48  
49  
50  
51  
52  
53  
54  
55  
56  
57  
58  
59  
60

1  
2  
3  
4  
5

**Patient and Public Involvement**

Patients and/or the public were not involved in the design, conduct, reporting or dissemination plans of this research.

For peer review only

1  
2  
3 1 REFERENCES  
4  
5 2  
6  
7 3  
8 4  
9 5  
10 6  
11 7  
12 8  
13 9  
14 10  
15 11  
16 12  
17 13  
18 14  
19 15  
20 16  
21 17  
22 18  
23 19  
24 20  
25 21  
26 22  
27 23  
28 24  
29 25  
30 26  
31 27  
32 28  
33 29  
34 30  
35 31  
36 32  
37 33  
38 34  
39 35  
40 36  
41 37  
42 38  
43 39  
44 40  
45 41  
46 42  
47 43  
48 44  
49 45  
50 46  
51 47  
52 48  
53 49  
54 50  
55 51  
56 52  
57 53  
58 54  
59  
60

1. OECD. Realising the Potential of Primary Health Care. Paris: OECD Publishing, 2020.
2. Starfield B. Is primary care essential? *Lancet* 1994;344(8930):1129-33. doi: 10.1016/s0140-6736(94)90634-3
3. Macinko J, Starfield B, Shi L. The contribution of primary care systems to health outcomes within Organization for Economic Cooperation and Development (OECD) countries, 1970-1998. *Health Serv Res* 2003;38(3):831-65. doi: 10.1111/1475-6773.00149
4. World Health Organization and United Nations Children's Fund (UNICEF). Operational framework for primary health care: transforming vision into action. Geneva, Switzerland, 2020:132.
5. Salah H. KM. Family Practice in the Eastern Mediterranean Region. Universal Health Coverage and Quality Primary Care. Florida, USA: Taylor and Francis Group 2018.
6. Elmusharaf K, Grafton D, Roberts E, et al. The Case for Investment in Prevention and Control of Non-communicable Diseases in Bahrain. Geneva: UNDP, WHO, UNIATF, GHC, 2021.
7. Elmusharaf K, Menescal B, Roberts E, et al. The Case for Investment in Prevention and Control of Non-communicable Diseases in Kuwait. Geneva: UNDP, WHO, UNIATF, GHC, 2021.
8. Elmusharaf K, Roberts E, Chestnov R, et al. The Case for Investment in Prevention and Control of Non-communicable Diseases in Oman. Geneva: UNDP, WHO, UNIATF, GHC, 2021.
9. Elmusharaf K, Stanton R, Chestnov R, et al. The Case for Investment in Prevention and Control of Non-communicable Diseases in Qatar. Geneva: UNDP, WHO, UNIATF, GHC, 2021.
10. Grafton D, Elmusharaf K, Jung J, et al. The Case for Investment in Prevention and Control of Non-communicable Diseases in the Kingdom of Saudi Arabia. Geneva: UNDP, WHO, UNIATF, GHC, 2021.
11. Elmusharaf K, Chestnov R, Jung J, et al. The Case for Investment in Prevention and Control of Non-communicable Diseases in the United Arab Emirates. Geneva: UNDP, WHO, UNIATF, GHC, 2021.
12. World Health Organization. Progress report on strengthening primary health care based health systems, 2009.
13. Avenir Health. OneHealth Tool. Intervention Assumptions, January 2016.
14. Sultanate of Oman. National Centre for Statistics and Information. Data Portal. Population. 2022 [Available from: <https://data.gov.om/OMPOP2016/population?indicator=1000140&region=1000020-muscat&nationality=1000010-omani> accessed 24/01/2022.
15. Bahrain Information & eGovernment Authority. Open Data Portal. Census and Demographic Statistics. 2019 [Available from: <https://www.data.gov.bh/explore/?sort=modified&refine.publisher=Information+%26+eGovernment+Authority&q=census&refine.keyword=Census+2020&refine.theme=Population> accessed 24/01/2022.
16. Qatar Planning and Statistics Authority. First Section. Population and Social Statistics 2019 [Available from: <https://www.psa.gov.qa/en/statistics1/pages/topicslisting.aspx?parent=Population&child=Population> accessed 24/01/2022 2022.
17. Kuwait Public Authority for Civil Information. Population Estimates of Kuwait by Age Group, Nationality & Gender. 2019 [Available from: <http://stat.paci.gov.kw> accessed 24/01/2022 2022.
18. Saudi Arabia General Authority for Statistics. Population by Gender , Age Groups and Nationality (Saudi/Non-Saudi) 2020 [Available from: <https://www.stats.gov.sa/en/5680> accessed 24/01/2022 2022.
19. Ministry of Health of Bahrain. Health Statistics 2019, 2021.
20. Sultanate of Oman Ministry of Health. Annual Health Report 2019, 2020.
21. Ministry of Health of Kuwait. Annual Health Report 2019. Fifty Sixth Edition (LVI), 20220.
22. Ministry of Health of the Kingdom of Saudi Arabia. Statistical Yearbook 2019. Chapter IV. Health Activities 2021 [Available from: <https://www.moh.gov.sa/en/Ministry/Statistics/book/Pages/default.aspx>.
23. World Health Organization. Review of vaccine price data: submitted by WHO European Region Member States through the WHO/UNICEF Joint Reporting Form for 2013. Copenhagen: World Health Organization. Regional Office for Europe, 2015.
24. World Health Organization. Primary health care on the road to universal health coverage: 2019 monitoring report, 2019.
25. Elmusharaf K, Poix S, Jung J, et al. The cost of health services delivered at primary care facilities in Bahrain. Geneva: UNDP, WHO, UNIATF, GHC, 2023.
26. Elmusharaf K, Poix S, Jung J, et al. The cost of health services delivered at primary care facilities in Oman. Geneva: UNDP, WHO, UNIATF, GHC, 2023.

- 1  
2  
3 1 27. Elmusharaf K, Poix S, Jung J, et al. The cost of health services delivered at primary care facilities in Kuwait.  
4 2 Geneva: UNDP, WHO, UNIATF, GHC, 2023.  
5 3 28. Elmusharaf K, Poix S, Jung J, et al. The cost of health services delivered at primary care facilities in Qatar.  
6 4 Geneva: UNDP, WHO, UNIATF, GHC, 2023.  
7 5 29. Elmusharaf K, Poix S, Jung J, et al. The cost of health services delivered at primary care facilities in the United  
8 6 Arab Emirates. Geneva: UNDP, WHO, UNIATF, GHC, 2023.  
9 7 30. Elmusharaf K, Poix S, Jung J, et al. The cost of health services delivered at primary care facilities in Saudi  
10 8 Arabia. Geneva: UNDP, WHO, UNIATF, GHC, 2023.  
11 9 31. The World Bank. World Bank Open Data 2024 [Available from: <https://data.worldbank.org> accessed 10 April  
12 10 2024.  
13 11 32. United Nations. World Population Prospects 2022, Online Edition, 2022.  
14 12 33. Shayah H, Sun Z. Employment in the Gulf Cooperation Council (GCC) Countries – Current Issues and Future  
15 13 Trends2019.  
16 14 34. Fadhil I, Ali R, Al-Raisi SS, et al. Review of National Healthcare Systems in the Gulf Cooperation Council  
17 15 Countries for Noncommunicable Diseases Management. *Oman Med J* 2022;37(3):e370. doi:  
18 16 10.5001/omj.2021.96 [published Online First: 20220510]  
19 17 35. Ali PB SD, Setiawan E, Nadjib M, Hafidz F, Thalagala N, Lang E, Dutta A, Silva R, Cantelmo C, Stein D,. Cost to  
20 18 Achieve Indonesia's Mid-Term Development Plan (RPJMN) 2020-2024 Targets: A Primary Healthcare  
21 19 Costing Approach Using the OneHealth Tool. Jakarta: Ministry of National Development  
22 20 Planning/National Development Planning Agency, 2020.  
23 21 36. Elmusharaf K, Grafton D, Jung JS, et al. The case for investing in the prevention and control of non-  
24 22 communicable diseases in the six countries of the Gulf Cooperation Council: an economic evaluation.  
25 23 *BMJ Glob Health* 2022;7(6) doi: 10.1136/bmjgh-2022-008670  
26 24 37. Fadhil I, Belaila B, Razzak HA. National accountability and response for noncommunicable diseases in the  
27 25 United Arab Emirates. *International Journal of Noncommunicable Diseases* 2019;4:4 - 9.  
28 26  
29  
30  
31  
32  
33  
34  
35  
36  
37  
38  
39  
40  
41  
42  
43  
44  
45  
46  
47  
48  
49  
50  
51  
52  
53  
54  
55  
56  
57  
58  
59  
60

## Economics of Primary Healthcare: Cost Estimation of Clinical Services at Primary Care Facilities in The Six Countries of The Gulf Cooperation Council.

Khalifa Elmusharaf, Sébastien Poix, Daniel Grafton, Johanna Jung, Rebecca Gribble, Rachael Stanton, Nicholas Banatvala, Lamia Mahmoud, Deena Alasfoor, Tayba Alawadi, Mohammed Mustafa, Lulwa Shuwaiter, Mohamed Alsuwaidan, Zahir Al-Abri, Sultana Al-Sabahi, Sherif Fiddah, Hassan Raza Syed, Muneera Almutairi, Yahya Al-Farsi, Dudley Tarlton

-

### Supplementary Materials

**Table S1. List of selected services by country**

| Service                                            | Bahrain | KSA | Kuwait | Oman | Qatar | UAE |
|----------------------------------------------------|---------|-----|--------|------|-------|-----|
| <b>Immunization</b>                                |         |     |        |      |       |     |
| Anti-rabies                                        |         |     | X      |      |       |     |
| BCG vaccine                                        | X       | X   | X      | X    | X     | X   |
| DPT vaccine                                        | X       |     | X      | X    | X     | X   |
| DT Adult                                           |         |     | X      |      |       |     |
| DT paediatrics                                     |         |     | X      |      |       |     |
| Heb B vaccine (paediatrics)                        |         |     | X      |      |       |     |
| Hep B vaccine                                      | X       |     |        |      | X     | X   |
| Hib vaccine                                        | X       |     |        |      | X     | X   |
| HPV vaccine                                        |         | X   |        |      |       | X   |
| Influenza vaccine                                  | X       |     | X      |      | X     | X   |
| Measles vaccine                                    | X       | X   | X      | X    | X     | X   |
| Meningococcal vaccine                              |         |     | X      |      |       |     |
| Pentavalent vaccine                                |         | X   | X      | X    |       |     |
| Pneumococcal vaccine                               | X       | X   | X      | X    | X     | X   |
| Polio vaccine                                      | X       | X   | X      | X    | X     | X   |
| Rotavirus vaccine                                  | X       |     | X      |      | X     | X   |
| Rubella vaccine                                    |         | X   |        |      |       |     |
| TT                                                 |         |     | X      |      |       |     |
| Varicella vaccine                                  | X       | X   | X      | X    | X     |     |
| <b>Non-Communicable Diseases</b>                   |         |     |        |      |       |     |
| <b>Breast Cancer</b>                               |         |     |        |      |       |     |
| Basic breast cancer awareness                      | X       | X   | X      | X    | X     | X   |
| Diagnosis after screened with clinical breast exam |         |     | X      | X    |       | X   |
| Diagnosis after screened with mammography          |         |     |        |      |       | X   |
| Diagnosis without screening for breast cancer      |         |     |        |      |       | X   |
| Diagnosis: screened with clinical breast exam      |         | X   |        |      |       |     |

|                                                                                              |                |            |               |             |              |            |
|----------------------------------------------------------------------------------------------|----------------|------------|---------------|-------------|--------------|------------|
| Diagnosis: screened with mammogram                                                           |                | X          |               |             |              |            |
| Post-treatment surveillance for breast cancer patients                                       |                | X          |               |             |              |            |
| Screening: clinical breast examination                                                       | X              | X          | X             | X           | X            | X          |
| <b>Service</b>                                                                               | <b>Bahrain</b> | <b>KSA</b> | <b>Kuwait</b> | <b>Oman</b> | <b>Qatar</b> | <b>UAE</b> |
| Screening: mammography                                                                       |                | X          |               |             |              | X          |
| <b>Cervical Cancer</b>                                                                       |                |            |               |             |              |            |
| HPV DNA + VIA                                                                                |                |            |               |             |              | X          |
| Papanicolaou test (pap smear)                                                                | X              | X          | X             | X           | X            | X          |
| Post-treatment surveillance for cervical cancer                                              |                | X          |               |             |              |            |
| Visual inspection with acetic acid (VIA)                                                     |                |            |               |             |              | X          |
| <b>Colorectal Cancer</b>                                                                     |                |            |               |             |              |            |
| Diagnosis for colorectal cancer screened with FIT                                            |                |            |               |             |              | X          |
| Diagnosis for colorectal cancer screened with FOBT                                           |                | X          |               |             |              | X          |
| Diagnosis without screening for colorectal cancer (symptom based)                            |                | X          |               |             |              | X          |
| Post-treatment surveillance for colorectal cancer                                            |                | X          |               |             |              |            |
| Screening: colonoscopy                                                                       |                | X          |               |             |              |            |
| Screening: faecal immunochemical test                                                        |                |            |               |             |              | X          |
| Screening: faecal occult blood testing                                                       | X              | X          | X             | X           | X            | X          |
| Screening: sigmoidoscopy                                                                     |                | X          |               |             |              |            |
| <b>CVD &amp; Diabetes</b>                                                                    |                |            |               |             |              |            |
| Follow-up care for those at low risk of CVD/Diabetes (absolute Risk: 10-20%)                 | X              | X          | X             | X           | X            | X          |
| Intensive glycaemic control                                                                  | X              | X          | X             | X           | X            | X          |
| Neuropathy screening and preventive foot care                                                | X              | X          | X             | X           | X            | X          |
| Referral for retinopathy screening                                                           |                |            |               | X           |              |            |
| Retinopathy screening                                                                        | X              |            | X             |             | X            | X          |
| Screening for risk of CVD/Diabetes                                                           | X              | X          | X             | X           | X            | X          |
| Standard glycaemic control                                                                   | X              | X          | X             | X           | X            | X          |
| Treatment for those with absolute risk of CVD/Diabetes 20-30%                                | X              | X          | X             | X           | X            | X          |
| Treatment for those with established cerebrovascular disease and post stroke                 | X              | X          | X             | X           | X            | X          |
| Treatment for those with high absolute risk of CVD/Diabetes (>30%)                           | X              | X          | X             | X           | X            | X          |
| Treatment for those with high blood pressure but low absolute risk of CVD/Diabetes (< 20%)   | X              | X          | X             | X           | X            | X          |
| Treatment for those with very high cholesterol but low absolute risk of CVD/Diabetes (< 20%) | X              | X          | X             | X           | X            | X          |
| Treatment of cases with established ischaemic heart disease (IHD)                            | X              | X          | X             | X           | X            | X          |
| Treatment of cases with rheumatic heart disease (with benzathine penicillin)                 | X              | X          |               |             | X            | X          |
| Treatment of new cases of acute myocardial infarction (AMI) with aspirin                     | X              | X          | X             | X           | X            | X          |
| <b>Emergency care</b>                                                                        |                |            |               |             |              |            |
| Average annual emergency care needs                                                          | X              | X          | X             | X           | X            | X          |
| <b>Oral Care</b>                                                                             |                |            |               |             |              |            |

|                                                                                 |                |            |               |             |              |            |
|---------------------------------------------------------------------------------|----------------|------------|---------------|-------------|--------------|------------|
| Dental cleaning and preventive care                                             | X              | X          | X             | X           | X            |            |
| Oral and dental care                                                            |                |            |               |             |              | X          |
| <b>Respiratory Diseases</b>                                                     |                |            |               |             |              |            |
| <b>Service</b>                                                                  | <b>Bahrain</b> | <b>KSA</b> | <b>Kuwait</b> | <b>Oman</b> | <b>Qatar</b> | <b>UAE</b> |
| Asthma: high dose inhaled beclomethasone + SABA                                 | X              |            | X             |             | X            | X          |
| Asthma: high dose inhaled fluticasone + SABA                                    |                | X          |               | X           |              |            |
| Asthma: inhaled short acting beta agonist for intermittent asthma               | X              | X          | X             | X           | X            | X          |
| Asthma: low dose inhaled beclomethasone + SABA                                  | X              |            | X             |             | X            | X          |
| Asthma: low dose inhaled fluticasone + SABA                                     |                | X          |               | X           |              |            |
| Asthma: oral prednisolone + theophylline + high dose inhaled fluticasone + SABA |                | X          |               | X           |              |            |
| Asthma: theophylline + high dose inhaled fluticasone + SABA                     |                | X          |               | X           |              |            |
| COPD: exacerbation treatment with antibiotics                                   | X              | X          | X             | X           | X            | X          |
| COPD: exacerbation treatment with oral prednisolone                             | X              | X          | X             | X           | X            | X          |
| COPD: exacerbation treatment with oxygen                                        |                | X          |               | X           |              | X          |
| COPD: inhaled salbutamol                                                        | X              | X          | X             | X           | X            | X          |
| COPD: ipratropium inhaler                                                       | X              | X          | X             | X           | X            | X          |
| COPD: low-dose oral theophylline                                                | X              | X          | X             | X           | X            |            |
| COPD: smoking cessation                                                         | X              | X          | X             | X           | X            | X          |
| <b>Child Health</b>                                                             |                |            |               |             |              |            |
| <b>Deworming</b>                                                                |                |            |               |             |              |            |
| Deworming                                                                       | X              |            | X             | X           | X            |            |
| <b>Diarrhea management</b>                                                      |                |            |               |             |              |            |
| Antibiotics for treatment of dysentery                                          |                | X          |               | X           |              | X          |
| ORS                                                                             | X              | X          | X             | X           | X            | X          |
| Treatment of severe diarrhea                                                    |                | X          |               |             |              |            |
| Zinc (diarrhea treatment)                                                       |                | X          |               | X           |              |            |
| <b>General</b>                                                                  |                |            |               |             |              |            |
| Zinc supplementation                                                            |                | X          |               | X           |              |            |
| Child general health                                                            | X              | X          | X             | X           | X            | X          |
| School health                                                                   | X              |            |               |             | X            |            |
| <b>Malaria</b>                                                                  |                |            |               |             |              |            |
| Malaria treatment (0-4, mild cases)                                             |                |            |               | X           |              |            |
| <b>Pneumonia</b>                                                                |                |            |               |             |              |            |
| Pneumonia treatment (children)                                                  | X              | X          | X             | X           | X            | X          |
| Treatment of severe pneumonia                                                   |                | X          |               |             |              |            |
| <b>Routine Child Health Care Visit</b>                                          |                |            |               |             |              |            |
| Routine child health care visit (< 1 year)                                      |                |            |               |             |              | X          |
| Routine child health care visit (1-5 years)                                     |                |            |               |             |              | X          |
| <b>School Health Program</b>                                                    |                |            |               |             |              |            |

|                                                                                               |                |            |               |             |              |            |
|-----------------------------------------------------------------------------------------------|----------------|------------|---------------|-------------|--------------|------------|
| Dental screening                                                                              |                |            |               | X           |              |            |
| Ear screening                                                                                 |                |            |               | X           |              |            |
| Eye screening                                                                                 |                |            |               | X           |              |            |
| <b>Service</b>                                                                                | <b>Bahrain</b> | <b>KSA</b> | <b>Kuwait</b> | <b>Oman</b> | <b>Qatar</b> | <b>UAE</b> |
| <b>Nutrition</b>                                                                              |                |            |               |             |              |            |
| <b>Adults</b>                                                                                 |                |            |               |             |              |            |
| Care for adults with food allergies and sensitivities                                         |                |            |               |             |              | X          |
| Care for adults with hyperuricemia                                                            |                |            |               |             |              | X          |
| Care for adults with kidney diseases                                                          |                |            |               |             |              | X          |
| Care for adults with low BMI                                                                  | X              | X          | X             | X           | X            |            |
| Care for adults with nutritional anaemia                                                      |                |            |               |             |              | X          |
| <b>Care for adults with other nutritional diseases</b>                                        |                |            |               |             |              |            |
| Care for diabetic adults                                                                      |                |            |               |             |              | X          |
| Care for obese adults                                                                         |                |            |               |             |              | X          |
| <b>All populations</b>                                                                        |                |            |               |             |              |            |
| Food fortification                                                                            |                |            |               |             |              | X          |
| <b>Children</b>                                                                               |                |            |               |             |              |            |
| Breastfeeding counselling and support                                                         | X              | X          | X             | X           | X            |            |
| Complementary feeding counselling and support                                                 | X              | X          | X             | X           |              |            |
| <b>Feeding counselling and support for infants and young children in emergency situations</b> |                |            |               |             |              |            |
| Intermittent iron supplementation in children                                                 | X              |            | X             | X           | X            |            |
| Management of food allergies or food intolerances                                             |                |            |               |             |              | X          |
| Management of moderate acute malnutrition                                                     |                |            |               |             |              | X          |
| Management of moderate acute malnutrition (children)                                          |                | X          |               | X           |              |            |
| Management of severe malnutrition                                                             |                |            |               |             |              | X          |
| <b>Pregnant and lactating women</b>                                                           |                |            |               |             |              |            |
| Calcium supplementation for prevention and treatment of pre-eclampsia and eclampsia           |                |            |               | X           |              |            |
| Daily FAF, postpartum, anaemic women                                                          |                |            |               | X           |              |            |
| Daily iron and folic acid supplementation (pregnant women)                                    | X              | X          | X             | X           | X            |            |
| Intermittent FAF, postpartum, non-anaemic pregnant women                                      |                |            |               | X           |              |            |
| Intermittent iron and folic acid supplementation (non-anaemic pregnant women)                 | X              | X          | X             | X           | X            |            |
| Iodine supplementation in pregnant women                                                      |                | X          |               |             |              |            |
| Vitamin A supplementation in pregnant women                                                   |                | X          |               |             |              |            |
| <b>Women of reproductive age and adolescent girls</b>                                         |                |            |               |             |              |            |
| Intermittent iron-folic acid supplementation                                                  | X              | X          | X             | X           | X            |            |
| <b>Mental Health</b>                                                                          |                |            |               |             |              |            |
| <b>Alcohol use/ dependence</b>                                                                |                |            |               |             |              |            |
| Identification and assessment of new cases of alcohol use/dependence                          |                |            |               | X           |              | X          |

|                                                                                                                           |                |            |               |             |              |            |
|---------------------------------------------------------------------------------------------------------------------------|----------------|------------|---------------|-------------|--------------|------------|
| Brief interventions and follow-up for alcohol use/dependence                                                              |                | X          |               | X           |              |            |
| Identification and assessment of new cases of alcohol use/dependence                                                      |                | X          |               |             |              |            |
| <b>Anxiety Disorders</b>                                                                                                  |                |            |               |             |              |            |
| <b>Service</b>                                                                                                            | <b>Bahrain</b> | <b>KSA</b> | <b>Kuwait</b> | <b>Oman</b> | <b>Qatar</b> | <b>UAE</b> |
| Basic psychological treatment for anxiety disorders (mild cases).                                                         | X              |            | X             | X           | X            | X          |
| Basic psychosocial treatment and anti-depressant medication for anxiety disorders (mild-moderate cases)                   | X              | X          | X             |             | X            | X          |
| Basic psychosocial treatment for anxiety disorders (mild cases)                                                           |                | X          |               |             |              |            |
| <b>Attention Disorders</b>                                                                                                |                |            |               |             |              |            |
| Methylphenidate medication                                                                                                |                |            |               |             |              | X          |
| <b>Bipolar Disorders</b>                                                                                                  |                |            |               |             |              |            |
| Basic psychosocial treatment, advice, and follow-up for bipolar disorder, plus mood-stabilizing medication                |                | X          |               |             |              | X          |
| <b>Conduct Disorders</b>                                                                                                  |                |            |               |             |              |            |
| Basic psychosocial treatment, advice, and follow-up for behavioural disorders                                             |                | X          |               |             |              | X          |
| <b>Dementia</b>                                                                                                           |                |            |               |             |              |            |
| Assessment, diagnosis, advice, and follow-up for dementia                                                                 |                | X          |               |             |              | X          |
| Dementia screening, basic work up and referral to tertiary care                                                           |                |            |               | X           |              |            |
| Pharmacological treatment of dementia                                                                                     |                |            |               |             |              | X          |
| <b>Depression</b>                                                                                                         |                |            |               |             |              |            |
| Basic psychosocial treatment and anti-depressant medication of first episode (mild to moderate cases)                     |                |            |               | X           |              |            |
| Basic psychosocial treatment and anti-depressant medication of first episode (moderate-severe cases)                      | X              | X          | X             |             | X            | X          |
| Basic psychosocial treatment for mild depression                                                                          | X              | X          | X             | X           | X            | X          |
| Intensive psychosocial treatment and anti-depressant medication of recurrent moderate-severe cases on a maintenance basis |                |            |               |             |              | X          |
| Psychosocial care for perinatal depression                                                                                |                |            |               |             |              | X          |
| Psychosocial care for perinatal depression for mild cases only                                                            |                |            |               | X           |              |            |
| <b>Developmental Disorders</b>                                                                                            |                |            |               |             |              |            |
| Basic psychosocial treatment, advice, and follow-up for developmental disorders                                           |                | X          |               |             |              | X          |
| <b>Drug use/dependence</b>                                                                                                |                |            |               |             |              |            |
| Brief interventions and follow-up for drug use/dependence                                                                 |                | X          |               | X           |              | X          |
| Identification and assessment of new cases of drug use/dependence                                                         |                | X          |               | X           |              |            |
| <b>Epilepsy</b>                                                                                                           |                |            |               |             |              |            |
| Basic psychosocial support, advice, and follow-up only                                                                    |                |            |               | X           |              |            |
| Basic psychosocial support, advice, and follow-up, plus anti-epileptic medication                                         |                | X          |               |             |              | X          |
| <b>Psychosis</b>                                                                                                          |                |            |               |             |              |            |
| Basic psychosocial support and anti-psychotic medication                                                                  |                | X          |               | X           |              | X          |
| <b>Self-harm/suicide</b>                                                                                                  |                |            |               |             |              |            |
| Assess and care for person with self-harm                                                                                 |                | X          |               | X           |              |            |



|                                                                           |                |            |               |             |              |            |
|---------------------------------------------------------------------------|----------------|------------|---------------|-------------|--------------|------------|
| Basic psychosocial treatment, advice, and follow-up for self-harm/suicide |                |            |               | X           |              |            |
| Pesticide intoxication management                                         |                |            |               | X           |              |            |
| <b>Maternal Newborn and Reproductive Health</b>                           |                |            |               |             |              |            |
| <b>Antenatal Care (ANC)</b>                                               |                |            |               |             |              |            |
| <b>Service</b>                                                            | <b>Bahrain</b> | <b>KSA</b> | <b>Kuwait</b> | <b>Oman</b> | <b>Qatar</b> | <b>UAE</b> |
| Antenatal Care (ANC)                                                      |                |            |               |             |              | X          |
| <b>Childbirth care - Facility births</b>                                  |                |            |               |             |              |            |
| Feeding counselling and support for low-birth-weight infants              |                |            |               | X           |              |            |
| Kangaroo mother care                                                      |                |            |               | X           |              |            |
| Labour and delivery management                                            |                |            |               | X           |              |            |
| Manual removal of placenta                                                |                |            |               | X           |              |            |
| MgSO4 for eclampsia                                                       |                |            |               | X           |              |            |
| Neonatal resuscitation                                                    |                |            |               | X           |              |            |
| Parenteral administration of uterotonics                                  |                |            |               | X           |              |            |
| Pre-referral management of labour complications                           |                | X          |               | X           |              |            |
| Treatment of local infections (newborn)                                   |                |            |               | X           |              |            |
| <b>Family planning</b>                                                    |                |            |               |             |              |            |
| Condom - male                                                             |                |            |               | X           |              |            |
| Contraception management                                                  |                |            |               |             | X            |            |
| Implant - Implanon (3 years)                                              |                |            |               | X           |              |            |
| Injectable - 3 month (depo provera)                                       | X              |            | X             | X           |              |            |
| IUCD follow-up care                                                       | X              |            | X             |             | X            |            |
| IUD - Copper-T 380-A IUD (10 years)                                       |                | X          |               | X           |              |            |
| Lactational amenorrhea method                                             |                |            |               | X           |              |            |
| Other contraceptives                                                      | X              |            | X             |             |              |            |
| Periodic abstinence                                                       |                |            |               | X           |              |            |
| Pill - progestin only                                                     | X              |            | X             | X           |              |            |
| Pill - standard daily regimen                                             |                | X          |               |             |              |            |
| Standard days method                                                      |                |            |               | X           |              |            |
| Withdrawal                                                                |                | X          |               | X           |              |            |
| Post-abortion case management                                             |                |            | X             |             | X            |            |
| <b>Management of ectopic pregnancy care</b>                               |                |            |               |             |              |            |
| Ectopic case management                                                   |                |            |               | X           |              |            |
| <b>Menopause Program</b>                                                  |                |            |               |             |              |            |
| Screen for mood disorders                                                 |                |            |               | X           |              |            |
| Screen for urogenital dryness                                             |                |            |               | X           |              |            |
| <b>Other</b>                                                              |                |            |               |             |              |            |
| Postmenopausal care                                                       |                |            | X             |             |              |            |
| Management of abnormal uterine bleeding                                   |                |            | X             |             |              |            |

|                                                                   |                |            |               |             |              |            |
|-------------------------------------------------------------------|----------------|------------|---------------|-------------|--------------|------------|
| Management of amenorrhoea                                         |                |            | X             |             |              |            |
| Management of hirsutism                                           |                |            | X             |             |              |            |
| Management of irregular cycles                                    |                |            | X             |             |              |            |
| Management of mild endometriosis                                  |                |            | X             |             |              |            |
| <b>Service</b>                                                    | <b>Bahrain</b> | <b>KSA</b> | <b>Kuwait</b> | <b>Oman</b> | <b>Qatar</b> | <b>UAE</b> |
| Management of PCO                                                 |                |            | X             |             |              |            |
| Management of pre pubertal problems (delayed menarche, infection) |                |            | X             |             |              |            |
| <b>Other sexual and reproductive health</b>                       |                |            |               |             |              |            |
| Cervical cancer screening                                         |                | X          | X             |             |              |            |
| Identification and management of infertility                      | X              | X          | X             | X           | X            |            |
| Treatment of chlamydia                                            | X              | X          | X             | X           | X            |            |
| Treatment of gonorrhoea                                           | X              | X          | X             | X           | X            |            |
| Treatment of pelvic inflammatory disease                          | X              | X          | X             | X           | X            |            |
| Treatment of syphilis                                             | X              | X          | X             | X           | X            |            |
| Treatment of trichomoniasis                                       | X              | X          | X             | X           | X            |            |
| Treatment of urinary tract infection                              | X              | X          | X             | X           | X            |            |
| <b>Postpartum Care</b>                                            |                |            |               |             |              |            |
| Breast feeding education and advice                               | X              |            | X             |             | X            |            |
| Mastitis                                                          | X              |            | X             | X           |              |            |
| Postnatal care                                                    |                |            |               |             |              | X          |
| Postpartum care examination                                       |                |            |               |             | X            |            |
| Treatment of postpartum haemorrhage                               | X              | X          | X             | X           | X            |            |
| Maternal sepsis case management                                   |                |            |               | X           |              |            |
| <b>Preconception Care (PCC)</b>                                   |                |            |               |             |              |            |
| Preconception care                                                |                |            |               |             |              | X          |
| <b>Pregnancy Care</b>                                             |                |            |               |             |              |            |
| Basic ANC                                                         | X              | X          | X             | X           | X            |            |
| Syphilis detection and treatment (pregnant women)                 | X              |            | X             |             | X            |            |
| Tetanus toxoid (pregnant women)                                   | X              | X          | X             | X           | X            |            |
| Syphilis screening (pregnant women)                               |                |            |               | X           |              |            |
| <b>Pregnancy care - Treatment of pregnancy complications</b>      |                |            |               |             |              |            |
| Deworming (pregnant women)                                        | X              |            | X             | X           |              |            |
| Hypertensive disorder case management                             |                | X          |               | X           |              |            |
| Management of other pregnancy complications                       |                |            |               | X           |              |            |
| Management of pre-eclampsia (magnesium sulphate)                  |                |            |               | X           |              |            |
| <b>Premarital screening program</b>                               |                |            |               |             |              |            |
| Premarital screening program                                      |                |            |               |             |              | X          |
| <b>General Practice</b>                                           |                |            |               |             |              |            |
| General practice                                                  | X              | X          | X             | X           | X            | X          |

**Table S2. Assumptions used to estimate the population in need, drugs and supplies costs, and labour costs (all countries)**

| Service                                                                   | Population in Need                                                                                     | Drugs and Supply Costs                                   | Labour Costs                                      |
|---------------------------------------------------------------------------|--------------------------------------------------------------------------------------------------------|----------------------------------------------------------|---------------------------------------------------|
| Varicella vaccine                                                         | Children 1 and 5 years old, for the first and the second dose                                          | USD 17.5 for one dose (WHO Review of vaccine price data) | Nurse (4 min) and GP (4 min) for one dose         |
| Influenza vaccine                                                         | Children 0-5 + Pregnant women + People 65+                                                             | USD 2.39 for one dose (WHO Review of vaccine price data) | Nurse (4 min) and GP (4 min) for one dose         |
| Retinopathy screening                                                     | People with diabetes should be screened every year (100%)                                              | -                                                        | -                                                 |
| Neuropathy screening                                                      | People with diabetes should be screened every year (100%)                                              | -                                                        | -                                                 |
| Clinical breast examination                                               | Women aged 40-70 should be screened every 2 years (50%)                                                | -                                                        | -                                                 |
| Diagnosis after screened with clinical breast examination                 | Based on country breast cancer incidence rate (WHO – IARC 2020)                                        | -                                                        | -                                                 |
| Pap smear                                                                 | Women 30-49 should be screened every 3 years (33%)                                                     | -                                                        | -                                                 |
| Faecal occult blood screening                                             | People 50+ should be screened every 10 years (10%)                                                     | -                                                        | -                                                 |
| Dental cleaning and preventive care                                       | All population                                                                                         | No costs estimated                                       | Nurse (20 min) and Dentist (15 min) for one visit |
| General child health                                                      | Children 0-14                                                                                          | Cost per outpatient visit (WHO-CHOICE) – Labour costs    | GP (15 min) for one visit                         |
| Pneumonia treatment                                                       | -                                                                                                      | -                                                        | Nurse (20 min) + GP (20 min) for one visit        |
| Daily iron and folic acid supplementation (anaemic pregnant women)        | 100% of anaemic pregnant women (World Bank)                                                            | -                                                        | -                                                 |
| Intermittent iron folic acid supplementation (non-anaemic pregnant women) | 100% of non-anaemic pregnant women (World Bank)                                                        | -                                                        | -                                                 |
| Daily FAF, postpartum, non-anaemic women                                  | Based on number of live births (Annual Health Statistics) and percentage of anaemic women (World Bank) |                                                          |                                                   |

|                                              |                                                                                                                                                          |                                                       |                                                       |
|----------------------------------------------|----------------------------------------------------------------------------------------------------------------------------------------------------------|-------------------------------------------------------|-------------------------------------------------------|
| Intermittent FAF, postpartum, anaemic women  | Based on number of live births (Annual Health Statistics) and percentage of non-anaemic women (World Bank)                                               |                                                       |                                                       |
| Care for adults with low BMI                 | 100% of underweight adults (Global Nutrition Report)                                                                                                     | -                                                     | -                                                     |
| All mental health clinical services          | Based on prevalence rates (Zuberi et al. 2021, GBD 2016 Epilepsy Collaborators, GBD 2016 Dementia Collaborators, WHO-EMRO, Atlas of Substance Disorder). | -                                                     | -                                                     |
| Treatment of postpartum haemorrhage (PPH)    | Based on incidence rates of PPH                                                                                                                          | -                                                     | -                                                     |
| Identification and management of infertility | Based on regional prevalence (Eldib 2018) among adults 15-49 (3.8%)                                                                                      | -                                                     | -                                                     |
| Treatment of syphilis                        | Based on regional incidence rates (Kenyon et al. 2014) among adults 15-49 (2.2%)                                                                         | -                                                     | -                                                     |
| Treatment of gonorrhoea                      | Based on regional incidence rates (Kenyon et al. 2014) among adults 15-49 (0.9%)                                                                         | -                                                     | -                                                     |
| Treatment of chlamydia                       | Based on regional incidence rates (Kenyon et al. 2014) among adults 15-49 (1.9%)                                                                         | -                                                     | -                                                     |
| Treatment of trichomoniasis                  | Based on regional incidence rates (Kenyon et al. 2014) among adults 15-49 (2.8%)                                                                         | -                                                     | -                                                     |
| Treatment of pelvic inflammatory infection   | Based on US incidence rate (Kresiel 2021) among adults 15-49 (3.6%)                                                                                      | -                                                     | -                                                     |
| General practice                             | All population                                                                                                                                           | Cost per outpatient visit (WHO-CHOICE) – Labour costs | GP (15 min) for one visit                             |
| All Services                                 | -                                                                                                                                                        | -                                                     | Community health workers time was allocated to nurses |

**Table S2-A. Country-specific assumptions (Oman)**

| Service                                  | Population in Need               | Drugs and Supply Costs | Labour Costs                 |
|------------------------------------------|----------------------------------|------------------------|------------------------------|
| School health program (eye screening)    | Children in grade 1, 4, 7 and 10 | No costs estimated     | Nurse (10 min) for one visit |
| School health program (dental screening) | Children in grade 1              | No costs estimated     | Nurse (10 min) for one visit |

|                                                                             |                           |                    |                              |
|-----------------------------------------------------------------------------|---------------------------|--------------------|------------------------------|
| School health program ( ear screening)                                      | Children in grade 1 and 2 | No costs estimated | Nurse (10 min) for one visit |
| Menopause program: screen for urogenital dryness, screen for mood disorders | Women 45-55 (100%)        | No costs estimated | GP (15 min) for one visit    |
| Elderly and community care program                                          | People 60+                | No costs estimated | Nurse (45 min) for one visit |

**Table S2-B. Country-specific assumptions (Bahrain)**

| Service       | Population in Need | Drugs and Supply Costs | Labour Costs                 |
|---------------|--------------------|------------------------|------------------------------|
| School health | Children 5-19      | No costs estimated     | Nurse (10 min) for one visit |

**Table S2-C. Country-specific assumptions (Kuwait)**

| Service                                                                                                                                      | Population in Need                                                            | Drugs and Supply Costs                      | Labour Costs                              |
|----------------------------------------------------------------------------------------------------------------------------------------------|-------------------------------------------------------------------------------|---------------------------------------------|-------------------------------------------|
| Meningococcal vaccine                                                                                                                        | PIN was not estimated since the number of visits was directly provided by MOH | USD 10.6 (WHO Review of vaccine price data) | Nurse (4 min) and GP (4 min) for one dose |
| DT adult vaccine                                                                                                                             | PIN was not estimated since the number of visits was directly provided by MOH | USD 1.8 (WHO Review of vaccine price data)  | Nurse (4 min) and GP (4 min) for one dose |
| DT pediatrics vaccine                                                                                                                        | PIN was not estimated since the number of visits was directly provided by MOH | USD 1.8 (WHO Review of vaccine price data)  | Nurse (4 min) and GP (4 min) for one dose |
| Anti-rabies vaccine                                                                                                                          | PIN was not estimated since the number of visits was directly provided by MOH | USD 48.6 (WHO Review of vaccine price data) | Nurse (4 min) and GP (4 min) for one dose |
| Hep B vaccine (paediatrics)                                                                                                                  | PIN was not estimated since the number of visits was directly provided by MOH | USD 3.24 (WHO Review of vaccine price data) | Nurse (4 min) and GP (4 min) for one dose |
| TT vaccine                                                                                                                                   | PIN was not estimated since the number of visits was directly provided by MOH | USD 0.58 (WHO Review of vaccine price data) | Nurse (4 min) and GP (4 min) for one dose |
| Management of pre-pubertal problems                                                                                                          | PIN was not estimated since the number of visits was directly provided by MOH | No costs estimated                          | Obs/Gyn (15 min) for one visit            |
| Management of PCO, hirsutism, irregular cycles, amenorrhea, abnormal uterine bleeding, management of mild endometriosis, postmenopausal care | PIN was not estimated since the number of visits was directly provided by MOH | No costs estimated                          | Obs/Gyn (15 min) for one visit            |

**Table S2-D. Country-specific assumptions (Qatar)**

| Service                     | Population in Need                                                            | Drugs and Supply Costs                                | Labour Costs                                   |
|-----------------------------|-------------------------------------------------------------------------------|-------------------------------------------------------|------------------------------------------------|
| Child General Health        | Children 0-14                                                                 | Cost per outpatient visit (WHO-CHOICE) – Labour costs | GP (15 min) for one visit                      |
| School health               | PIN was not estimated since the number of visits was directly provided by MOH | No costs estimated                                    | Nurse (10 min) for one visit                   |
| Postpartum care examination | PIN was not estimated since the number of visits was directly provided by MOH | Cost per outpatient visit (WHO-CHOICE) – Labour costs | GP (10 min) and Midwife (20 min) for one visit |
| Allied health               | PIN was not estimated since the number of visits was directly provided by MOH | Cost per outpatient visit (WHO-CHOICE) – Labour costs | Nurse (20 min) for one visit                   |

**Table S2-E. Country-specific assumptions (UAE)**

| Service                                                   | Population in Need                                                  | Drugs and Supply Costs                                    | Labour Costs                |
|-----------------------------------------------------------|---------------------------------------------------------------------|-----------------------------------------------------------|-----------------------------|
| <b>Screening: mammography</b>                             | Women aged 40-70 should be screened every 2 years (50%)             | -                                                         | -                           |
| <b>Diagnosis for breast cancer</b>                        | Based on country breast cancer incidence rate (WHO – IARC 2020)     | -                                                         | -                           |
| <b>Visual inspection with acetic acid, HPV DNA + VIA.</b> | Based on country cervix cancer incidence rate (WHO – IARC 2020)     | -                                                         | -                           |
| <b>Screening; faecal immunochemical test</b>              | Based on country colorectal cancer incidence rate (WHO – IARC 2020) | -                                                         | -                           |
| <b>Diagnosis for colorectal cancer</b>                    | Based on country colorectal cancer incidence rate (WHO – IARC 2020) | -                                                         | -                           |
| <b>Routine child healthcare visit (1 year)</b>            | Children 0-12 months (100%)                                         | Estimate based on OHT drugs and supplies prices: USD 19.7 | Nurse (20 min), GP (10 min) |
| <b>Routine child healthcare visit (1-5 years)</b>         | Children 12-59 months (100%)                                        | Estimate based on OHT drugs and supplies prices: USD 2.8  | Nurse (20 min), GP (10 min) |
| <b>Nutrition: Care for obese adults</b>                   | People with obesity (Global Nutrition Report)                       | No costs estimated                                        | GP (10 min)                 |
| <b>Nutrition: Care for diabetic adults</b>                | People with diabetes (OHT)                                          | No costs estimated                                        | GP (10 min)                 |

|                                                                         |                                                                          |                                                            |                                                      |
|-------------------------------------------------------------------------|--------------------------------------------------------------------------|------------------------------------------------------------|------------------------------------------------------|
| <b>Nutrition: Care for adults with kidney diseases</b>                  | Adults with chronic kidney disease (Al-Shamsi et al. 2018)               | No costs estimated                                         | GP (10 min)                                          |
| <b>Nutrition: Care for adults with nutritional anaemia</b>              | Adults with anaemia (Global Nutrition Report)                            | No costs estimated                                         | GP (10 min)                                          |
| <b>Nutrition: Care for adults with food allergies and sensitivities</b> | People with nutrition-related allergies (Althumiri et al. 2021)          | No costs estimated                                         | GP (10 min), Specialist Doctor (30 min)              |
| <b>Management of food allergies and food intolerance</b>                | Children 0-14 x Global Prevalence of Allergies (3.0%)                    | No costs estimated                                         | GP (10 min), Specialist Doctor (30 min)              |
| <b>Preconception care</b>                                               | Married women or planning for marriage at reproductive age (15-49 years) | Estimate based on OHT drugs and supplies prices: USD 4.90  | Nurse (15 min), GP (15 min)                          |
| <b>Antenatal care</b>                                                   | Pregnant women                                                           | Estimate based on OHT drugs and supplies prices: USD 36.42 | GP (40 min), Radiographer (20 min), Midwife (40 min) |
| <b>Postnatal care</b>                                                   | Women who gave birth                                                     | No costs estimated                                         | Nurse (15 min), GP (15 min)                          |
| <b>Premarital screening program</b>                                     | Women (15-49) planning for a marriage                                    | Estimate based on OHT drugs and supplies prices: USD 15.66 | Nurse (15 min), GP (15 min)                          |

**Table S2-F. Country-specific assumptions (KSA)**

| Service                                                       | Population in Need                                                  | Drugs and Supply Costs | Labour Costs |
|---------------------------------------------------------------|---------------------------------------------------------------------|------------------------|--------------|
| <b>Screening: mammography</b>                                 | Women aged 40-70 should be screened every 2 years (50%)             | -                      | -            |
| <b>Post-treatment surveillance for breast cancer patients</b> | Based on country breast cancer incidence rate (WHO – IARC 2020)     | -                      | -            |
| <b>Post treatment surveillance for cervical cancer</b>        | Based on country cervix cancer incidence rate (WHO – IARC 2020)     | -                      | -            |
| <b>Screening: Sigmoidoscopy, colonoscopy</b>                  | People 50+ should be screened every 10 years (10%)                  | -                      | -            |
| <b>Post treatment surveillance for colorectal cancer</b>      | Based on country colorectal cancer incidence rate (WHO – IARC 2020) | -                      | -            |

**Table S3. References and assumptions used to estimate the total number of services delivered in 2019 in Oman**

| Immunization                                                                                 | Reference / Assumption                                                      |
|----------------------------------------------------------------------------------------------|-----------------------------------------------------------------------------|
| Measles vaccine                                                                              | MOH Health Statistics 2019 <sup>1</sup>                                     |
| Pentavalent vaccine                                                                          |                                                                             |
| Varicella vaccine                                                                            |                                                                             |
| DPT vaccination                                                                              |                                                                             |
| Polio vaccine                                                                                |                                                                             |
| BCG vaccine                                                                                  |                                                                             |
| Pneumococcal vaccine                                                                         |                                                                             |
| <b>Non-Communicable Diseases</b>                                                             |                                                                             |
| CVD & Diabetes                                                                               |                                                                             |
| Screening for risk of CVD/Diabetes                                                           | Assumption: 5.0%                                                            |
| Follow-up care for those at low risk of CVD/Diabetes (Absolute Risk: 10-20%)                 | Assumption: 5.0%                                                            |
| Treatment for those with very high cholesterol but low absolute risk of CVD/Diabetes (< 20%) | Assumption derived from UHC Service Coverage Sub-Index on NCDs <sup>2</sup> |
| Treatment for those with high blood pressure but low absolute risk of CVD/Diabetes (< 20%)   |                                                                             |
| Treatment for those with absolute risk of CVD/Diabetes 20-30%                                |                                                                             |
| Treatment for those with high absolute risk of CVD/Diabetes (>30%)                           |                                                                             |
| Treatment of new cases of acute myocardial infarction (AMI) with aspirin                     |                                                                             |
| Treatment of cases with established ischaemic heart disease (IHD)                            |                                                                             |
| Treatment for those with established cerebrovascular disease and post stroke                 | Estimate from MOH Health Statistics 2019 <sup>1</sup>                       |
| Standard glycaemic control                                                                   |                                                                             |
| Intensive glycaemic control                                                                  |                                                                             |
| Referral for retinopathy screening                                                           |                                                                             |
| Neuropathy screening and preventive foot care                                                |                                                                             |
| <b>Breast Cancer</b>                                                                         |                                                                             |
| Basic breast cancer awareness                                                                | Assumption: 5.0%                                                            |
| Screening: clinical breast examination (CBE)                                                 | MOH Health Statistics <sup>1</sup>                                          |
| Diagnosis after screened with clinical breast exam                                           | Assumption derived from WHO-IARC 2020 <sup>3</sup>                          |
| <b>Cervical Cancer</b>                                                                       |                                                                             |
| Papanicolaou test (pap smear)                                                                | Assumption derived from Bahrain CR                                          |
| <b>Colorectal Cancer</b>                                                                     |                                                                             |
| Screening: faecal occult blood testing                                                       | Assumption derived from 'CBE'                                               |
| <b>Elderly and community care program</b>                                                    |                                                                             |
| Elderly and community care program                                                           | MOH Health Statistics 2019 <sup>1</sup>                                     |
| <b>Respiratory Disease</b>                                                                   |                                                                             |



|    |                                                                                 |                                                                         |
|----|---------------------------------------------------------------------------------|-------------------------------------------------------------------------|
| 1  |                                                                                 |                                                                         |
| 2  |                                                                                 |                                                                         |
| 3  |                                                                                 |                                                                         |
| 4  | Asthma: Inhaled short acting beta agonist for intermittent asthma               |                                                                         |
| 5  | Asthma: Low dose inhaled fluticasone + SABA                                     |                                                                         |
| 6  | Asthma: High dose inhaled fluticasone + SABA                                    |                                                                         |
| 7  |                                                                                 |                                                                         |
| 8  | Asthma: Theophylline + High dose inhaled fluticasone + SABA                     |                                                                         |
| 9  |                                                                                 |                                                                         |
| 10 | Asthma: Oral Prednisolone + Theophylline + High dose inhaled fluticasone + SABA |                                                                         |
| 11 | COPD: smoking cessation                                                         |                                                                         |
| 12 |                                                                                 | MOH Health Statistics 2019 <sup>1</sup>                                 |
| 13 | COPD: inhaled salbutamol                                                        |                                                                         |
| 14 |                                                                                 |                                                                         |
| 15 | COPD: low-dose oral theophylline                                                |                                                                         |
| 16 | COPD: ipratropium inhaler                                                       |                                                                         |
| 17 |                                                                                 |                                                                         |
| 18 | COPD: Exacerbation treatment with antibiotics                                   |                                                                         |
| 19 |                                                                                 |                                                                         |
| 20 | COPD: Exacerbation treatment with oral prednisolone                             |                                                                         |
| 21 | COPD: Exacerbation treatment with oxygen                                        |                                                                         |
| 22 |                                                                                 |                                                                         |
| 23 | Emergency care                                                                  |                                                                         |
| 24 | Average annual emergency care needs                                             | N/A                                                                     |
| 25 |                                                                                 |                                                                         |
| 26 | Child Health                                                                    |                                                                         |
| 27 | General                                                                         |                                                                         |
| 28 |                                                                                 |                                                                         |
| 29 | Child general health                                                            | Assumption: 25% of GP visits (MOH Health Statistics 2019 <sup>1</sup> ) |
| 30 |                                                                                 |                                                                         |
| 31 | Deworming                                                                       | Assumption derived from UHC Service Coverage Index (WHO) <sup>2</sup>   |
| 32 | Zinc supplementation                                                            |                                                                         |
| 33 |                                                                                 |                                                                         |
| 34 | Diarrhea management                                                             |                                                                         |
| 35 | ORS                                                                             |                                                                         |
| 36 |                                                                                 |                                                                         |
| 37 | Zinc (diarrhea treatment)                                                       | Assumption derived from UHC Service Coverage Index (WHO) <sup>2</sup>   |
| 38 | Antibiotics for treatment of dysentery                                          |                                                                         |
| 39 |                                                                                 |                                                                         |
| 40 | Pneumonia                                                                       |                                                                         |
| 41 |                                                                                 |                                                                         |
| 42 | Pneumonia treatment (children, mild cases)                                      | Estimate from MOH Health Statistics 2019 <sup>1</sup>                   |
| 43 | Malaria                                                                         |                                                                         |
| 44 |                                                                                 |                                                                         |
| 45 | Malaria treatment (0-4, mild cases)                                             | Estimate from MOH Health Statistics 2019 <sup>1</sup>                   |
| 46 | School Health Program                                                           |                                                                         |
| 47 |                                                                                 |                                                                         |
| 48 | Eye screening                                                                   |                                                                         |
| 49 | Dental screening                                                                | MOH Health Statistics 2019 <sup>1</sup>                                 |
| 50 |                                                                                 |                                                                         |
| 51 | Ear screening                                                                   |                                                                         |
| 52 |                                                                                 |                                                                         |
| 53 | Nutrition                                                                       |                                                                         |
| 54 | Women of reproductive age and adolescent girls                                  |                                                                         |
| 55 |                                                                                 |                                                                         |
| 56 | Intermittent iron-folic acid supplementation                                    | Assumption: 5%                                                          |
| 57 | Pregnant and lactating women                                                    |                                                                         |
| 58 |                                                                                 |                                                                         |
| 59 | Daily iron and folic acid supplementation (pregnant women)                      | Estimate from MOH Health Statistics 2019 <sup>1</sup>                   |
| 60 |                                                                                 |                                                                         |

|                                                                                                            |                                                                       |
|------------------------------------------------------------------------------------------------------------|-----------------------------------------------------------------------|
| Intermittent iron and folic acid supplementation (non-anaemic pregnant women)                              |                                                                       |
| Calcium supplementation for prevention and treatment of pre-eclampsia and eclampsia                        |                                                                       |
| Daily FAF, postpartum, anaemic women                                                                       | Estimate from MOH Health Statistics 2019 <sup>1</sup>                 |
| Intermittent FAF, postpartum, non-anaemic pregnant women                                                   |                                                                       |
| Adults                                                                                                     |                                                                       |
| Care for adults with low BMI                                                                               | Assumption: 2.5%                                                      |
| Children                                                                                                   |                                                                       |
| Breastfeeding counselling and support                                                                      | MOH Health Statistics 2019 <sup>1</sup>                               |
| Complementary feeding counselling and support                                                              | Assumption derived from UHC Service Coverage Index (WHO) <sup>2</sup> |
| Intermittent iron supplementation in children                                                              |                                                                       |
| Management of moderate acute malnutrition (children)                                                       | MOH Health Statistics 2019 <sup>1</sup>                               |
| <b>Mental Health</b>                                                                                       |                                                                       |
| Anxiety Disorders                                                                                          |                                                                       |
| Basic psychological treatment for anxiety disorders (mild cases).                                          | Estimate from MOH Health Statistics 2019 <sup>1</sup>                 |
| Basic psychosocial treatment and anti-depressant medication for anxiety disorders (mild to moderate cases) |                                                                       |
| Depression                                                                                                 |                                                                       |
| Basic psychosocial treatment for mild depression                                                           | Estimate from MOH Health Statistics 2019 <sup>1</sup>                 |
| Basic psychosocial treatment and anti-depressant medication of first episode (mild to moderate cases)      |                                                                       |
| Psychosocial care for peri-natal depression for mild cases only                                            |                                                                       |
| Psychosis                                                                                                  |                                                                       |
| Basic psychosocial support and anti-psychotic medication                                                   | Estimate from MOH Health Statistics 2019 <sup>1</sup>                 |
| Epilepsy                                                                                                   |                                                                       |
| Basic psychosocial support, advice, and follow-up only                                                     | Estimate from MOH Health Statistics 2019 <sup>1</sup>                 |
| Dementia                                                                                                   |                                                                       |
| Dementia screening, basic work up and referral to tertiary care                                            | Estimate from MOH Health Statistics 2019 <sup>1</sup>                 |
| Alcohol use/ dependence                                                                                    |                                                                       |
| Identification and assessment of new cases of alcohol use/dependence                                       | Estimate from MOH Health Statistics 2019 <sup>1</sup>                 |
| Brief interventions and follow-up for alcohol use/dependence                                               |                                                                       |
| Drug use/dependence                                                                                        |                                                                       |
| Identification and assessment of new cases of drug use/dependence                                          | Estimate from MOH Health Statistics 2019 <sup>1</sup>                 |
| Brief interventions and follow-up for drug use/dependence                                                  |                                                                       |
| Self-harm/suicide                                                                                          |                                                                       |
| Assess and care for person with self-harm                                                                  | Estimate from MOH Health Statistics 2019 <sup>1</sup>                 |
| Basic psychosocial treatment, advice, and follow-up for self-harm/suicide                                  |                                                                       |
| Pesticide intoxication management                                                                          |                                                                       |
| <b>Maternal Newborn and Reproductive Health</b>                                                            |                                                                       |

|    |                                                                                      |                                                                                   |
|----|--------------------------------------------------------------------------------------|-----------------------------------------------------------------------------------|
| 1  | Family planning                                                                      |                                                                                   |
| 2  |                                                                                      |                                                                                   |
| 3  | Pill - Progestin only                                                                | MOH Health Statistics 2019 <sup>1</sup>                                           |
| 4  | Condom - Male                                                                        |                                                                                   |
| 5  | Injectable - 3 month (Depo Provera)                                                  |                                                                                   |
| 6  | IUD - Copper-T 380-A IUD (10 years)                                                  |                                                                                   |
| 7  | Implant - Implanon (3 years)                                                         |                                                                                   |
| 8  | LAM (Lactational Amenorrhea Method)                                                  | MOH Health Statistics 2019 <sup>1</sup>                                           |
| 9  | SDM (Standard Days Method)                                                           |                                                                                   |
| 10 | Periodic abstinence                                                                  |                                                                                   |
| 11 | Withdrawal                                                                           |                                                                                   |
| 12 | Management of ectopic pregnancy care                                                 |                                                                                   |
| 13 | Ectopic case management                                                              | Assumption: 100%                                                                  |
| 14 | Pregnancy care - ANC                                                                 |                                                                                   |
| 15 | Tetanus toxoid (pregnant women)                                                      | Estimate from MOH Health Statistics 2019 <sup>1</sup>                             |
| 16 | Syphilis screening (pregnant women)                                                  | MOH Health Statistics 2019 <sup>1</sup>                                           |
| 17 | Basic ANC                                                                            |                                                                                   |
| 18 | Pregnancy care - Treatment of pregnancy complications                                |                                                                                   |
| 19 | Hypertensive disorder case management                                                | Assumption: 99%                                                                   |
| 20 | Management of pre-eclampsia (Magnesium sulphate)                                     |                                                                                   |
| 21 | Management of other pregnancy complications                                          |                                                                                   |
| 22 | Deworming (pregnant women), part of general care and not specific for pregnant women | Assumption derived from UHC Service Coverage Sub-Index on RMNH (WHO) <sup>2</sup> |
| 23 | Childbirth care - Facility births                                                    |                                                                                   |
| 24 | Parenteral administration of uterotonics                                             | Estimate from MOH Health Statistics 2019 <sup>1</sup>                             |
| 25 | Labour and delivery management                                                       |                                                                                   |
| 26 | Pre-referral management of labour complications                                      |                                                                                   |
| 27 | MgSO <sub>4</sub> for eclampsia                                                      |                                                                                   |
| 28 | Neonatal resuscitation                                                               |                                                                                   |
| 29 | Treatment of local infections (newborn)                                              |                                                                                   |
| 30 | Kangaroo mother care                                                                 |                                                                                   |
| 31 | Feeding counselling and support for low-birth-weight infants                         |                                                                                   |
| 32 | Manual removal of placenta                                                           |                                                                                   |
| 33 | Postpartum care - Treatment of sepsis                                                |                                                                                   |
| 34 | Maternal sepsis case management                                                      | Estimate from MOH Health Statistics 2019 <sup>1</sup>                             |
| 35 | Postpartum care - Other                                                              |                                                                                   |
| 36 | Mastitis                                                                             | Estimate from UHC Service Coverage Sub-Index on RMNH (WHO) <sup>2</sup>           |
| 37 | Treatment of postpartum haemorrhage                                                  | Assumption: 100%                                                                  |

|                                                                 |                                                       |
|-----------------------------------------------------------------|-------------------------------------------------------|
| Other sexual and reproductive health                            |                                                       |
| Treatment of urinary tract infection (UTI)                      | MOH Health Statistics 2019 <sup>1</sup>               |
| Identification and management of infertility                    |                                                       |
| Treatment of syphilis                                           |                                                       |
| Treatment of gonorrhoea                                         |                                                       |
| Treatment of chlamydia                                          |                                                       |
| Treatment of trichomoniasis                                     |                                                       |
| Treatment of PID (Pelvic Inflammatory Disease)- mild cases only |                                                       |
| Menopause Program                                               |                                                       |
| Screen for urogenital dryness                                   | Assumption: 7.5%                                      |
| Screen for mood disorders                                       | Assumption: 7.5%                                      |
| General Practice                                                |                                                       |
| General Practice                                                | Estimate from MOH Health Statistics 2019 <sup>1</sup> |
| Oral Care                                                       |                                                       |
| Dental cleaning and preventive care                             | MOH Health Statistics 2019 <sup>1</sup>               |

**Table S4. References and assumptions used to estimate the total number of services delivered in 2019 in Bahrain**

|                                                                                              |                                                       |
|----------------------------------------------------------------------------------------------|-------------------------------------------------------|
| Immunization                                                                                 |                                                       |
| Rotavirus vaccine                                                                            | MOH Health Statistics 2019 <sup>4</sup>               |
| Measles vaccine                                                                              |                                                       |
| DPT vaccine                                                                                  |                                                       |
| Hib vaccine                                                                                  |                                                       |
| Hep B vaccine                                                                                |                                                       |
| Polio vaccine                                                                                |                                                       |
| BCG vaccine                                                                                  |                                                       |
| Pneumococcal vaccine                                                                         |                                                       |
| Varicella vaccine                                                                            | Estimate from MOH Health Statistics 2019 <sup>4</sup> |
| Influenza vaccine                                                                            | MOH Health Statistics 2019 <sup>4</sup>               |
| Non-Communicable Diseases                                                                    |                                                       |
| CVD & Diabetes                                                                               |                                                       |
| Screening for risk of CVD/Diabetes                                                           | Assumption: 5.0%                                      |
| Follow-up care for those at low risk of CVD/Diabetes (Absolute Risk: 10-20%)                 | Estimate from MOH Health Statistics 2019 <sup>4</sup> |
| Treatment for those with very high cholesterol but low absolute risk of CVD/Diabetes (< 20%) |                                                       |
| Treatment for those with high blood pressure but low absolute risk of CVD/Diabetes (< 20%)   |                                                       |
| Treatment for those with absolute risk of CVD/Diabetes 20-30%                                |                                                       |

|    |                                                                              |                                                                                                 |
|----|------------------------------------------------------------------------------|-------------------------------------------------------------------------------------------------|
| 1  |                                                                              |                                                                                                 |
| 2  |                                                                              |                                                                                                 |
| 3  |                                                                              |                                                                                                 |
| 4  | Treatment for those with high absolute risk of CVD/Diabetes (>30%)           |                                                                                                 |
| 5  | Treatment of new cases of acute myocardial infarction (AMI) with aspirin     |                                                                                                 |
| 6  | Treatment of cases with established ischaemic heart disease (IHD)            |                                                                                                 |
| 7  |                                                                              |                                                                                                 |
| 8  | Treatment for those with established cerebrovascular disease and post stroke |                                                                                                 |
| 9  |                                                                              |                                                                                                 |
| 10 | Treatment of cases with rheumatic heart disease (with benzathine penicillin) |                                                                                                 |
| 11 |                                                                              |                                                                                                 |
| 12 | Standard glycaemic control                                                   | Estimate from MOH Health Statistics 2019 <sup>4</sup>                                           |
| 13 | Intensive glycaemic control                                                  |                                                                                                 |
| 14 | Retinopathy screening                                                        |                                                                                                 |
| 15 | Neuropathy screening and preventive foot care                                |                                                                                                 |
| 16 |                                                                              |                                                                                                 |
| 17 |                                                                              |                                                                                                 |
| 18 | Breast Cancer                                                                |                                                                                                 |
| 19 |                                                                              |                                                                                                 |
| 20 | Basic breast cancer awareness                                                | Assumption: 5.0%                                                                                |
| 21 |                                                                              |                                                                                                 |
| 22 | Screening: clinical breast examination (CBE)                                 | MOH Health Statistics 2019 <sup>4</sup>                                                         |
| 23 |                                                                              |                                                                                                 |
| 24 | Cervical Cancer                                                              |                                                                                                 |
| 25 |                                                                              |                                                                                                 |
| 26 | Papanicolaou test (pap smear)                                                | MOH Health Statistics 2019 <sup>4</sup>                                                         |
| 27 |                                                                              |                                                                                                 |
| 28 | Colorectal Cancer                                                            |                                                                                                 |
| 29 |                                                                              |                                                                                                 |
| 30 | Screening: faecal occult blood testing                                       | Estimate from 'CBE' and 'pap smear'                                                             |
| 31 |                                                                              |                                                                                                 |
| 32 | Respiratory Disease                                                          |                                                                                                 |
| 33 |                                                                              |                                                                                                 |
| 34 | Asthma: Inhaled short acting beta agonist for intermittent asthma            | Assumption derived from UHC Service Coverage Sub-Index on NCDs (WHO) <sup>2</sup>               |
| 35 | Asthma: low dose inhaled beclomethasone + SABA                               |                                                                                                 |
| 36 | Asthma: high dose inhaled beclomethasone + SABA                              |                                                                                                 |
| 37 | COPD: smoking cessation                                                      |                                                                                                 |
| 38 | COPD: inhaled salbutamol                                                     |                                                                                                 |
| 39 | COPD: low-dose oral theophylline                                             |                                                                                                 |
| 40 | COPD: ipratropium inhaler                                                    |                                                                                                 |
| 41 | COPD: exacerbation treatment with antibiotics                                |                                                                                                 |
| 42 | COPD: exacerbation treatment with oral prednisolone                          |                                                                                                 |
| 43 |                                                                              |                                                                                                 |
| 44 | Emergency care                                                               |                                                                                                 |
| 45 |                                                                              |                                                                                                 |
| 46 | Average annual emergency care needs                                          | N/A                                                                                             |
| 47 |                                                                              |                                                                                                 |
| 48 | Child Health                                                                 |                                                                                                 |
| 49 |                                                                              |                                                                                                 |
| 50 | General Health                                                               |                                                                                                 |
| 51 |                                                                              |                                                                                                 |
| 52 | Child general health                                                         | Assumption: 25% of total number of GP Visit (MOH Health Statistics 2019 <sup>4</sup> )          |
| 53 |                                                                              |                                                                                                 |
| 54 | School Health                                                                |                                                                                                 |
| 55 |                                                                              |                                                                                                 |
| 56 | School Health                                                                | MOH Health Statistics 2019 <sup>4</sup>                                                         |
| 57 |                                                                              |                                                                                                 |
| 58 | Deworming                                                                    |                                                                                                 |
| 59 |                                                                              |                                                                                                 |
| 60 | Deworming                                                                    | Assumption derived from UHC Service Coverage Sub-Index on Infectious Disease (WHO) <sup>2</sup> |
|    | Diarrhea management                                                          |                                                                                                 |

|    |                                                                                                           |                                                                                                 |
|----|-----------------------------------------------------------------------------------------------------------|-------------------------------------------------------------------------------------------------|
| 1  | ORS                                                                                                       | Assumption derived from UHC Service Coverage Sub-Index on Infectious Disease (WHO) <sup>2</sup> |
| 2  | Pneumonia                                                                                                 |                                                                                                 |
| 3  | Pneumonia treatment (children)                                                                            | Assumption derived from UHC Service Coverage Sub-Index on Infectious Disease (WHO) <sup>2</sup> |
| 4  | Nutrition                                                                                                 |                                                                                                 |
| 5  | Women of reproductive age and adolescent girls                                                            |                                                                                                 |
| 6  | Intermittent iron-folic acid supplementation                                                              | Assumption: 5.0%                                                                                |
| 7  | Pregnant and lactating women                                                                              |                                                                                                 |
| 8  | Daily iron and folic acid supplementation (pregnant women)                                                | Assumption derived from UHC Service Coverage Sub-Index on RMCH (WHO) <sup>2</sup>               |
| 9  | Intermittent iron and folic acid supplementation (non-anaemic pregnant women)                             |                                                                                                 |
| 10 | Adults                                                                                                    |                                                                                                 |
| 11 | Care for adults with low BMI                                                                              | Estimate from MOH Health Statistics 2019 <sup>4</sup>                                           |
| 12 | Children                                                                                                  |                                                                                                 |
| 13 | Breastfeeding counselling and support                                                                     | Assumption derived from UHC Service Coverage Sub-Index on RMCH (WHO) <sup>2</sup>               |
| 14 | Complementary feeding counselling and support                                                             |                                                                                                 |
| 15 | Intermittent iron supplementation in children                                                             | Assumption derived from UHC Service Coverage Index (WHO) <sup>2</sup>                           |
| 16 | Mental Health                                                                                             |                                                                                                 |
| 17 | Anxiety Disorders                                                                                         |                                                                                                 |
| 18 | Basic psychological treatment for anxiety disorders (mild cases).                                         | Estimate from MOH Health Statistics 2019 <sup>4</sup>                                           |
| 19 | Basic psychosocial treatment and anti-depressant medication for anxiety disorders (moderate-severe cases) |                                                                                                 |
| 20 | Depression                                                                                                |                                                                                                 |
| 21 | Basic psychosocial treatment for mild depression                                                          | Estimate from MOH Health Statistics 2019 <sup>4</sup>                                           |
| 22 | Basic psychosocial treatment and anti-depressant medication of first episode moderate-severe cases        |                                                                                                 |
| 23 | Maternal Newborn and Reproductive Health                                                                  |                                                                                                 |
| 24 | Family planning                                                                                           |                                                                                                 |
| 25 | Pill - Progestin only                                                                                     | United Nations 2019 <sup>5</sup>                                                                |
| 26 | Injectable - 3 month (Depo Provera)                                                                       |                                                                                                 |
| 27 | Other contraceptives                                                                                      |                                                                                                 |
| 28 | IUCD follow-up care                                                                                       | Assumption derived from UHC Service Coverage Index (WHO) <sup>2</sup>                           |
| 29 | Pregnancy Care                                                                                            |                                                                                                 |
| 30 | Tetanus toxoid (pregnant women)                                                                           | Estimate from MOH Health Statistics 2019 <sup>4</sup>                                           |
| 31 | Syphilis detection and treatment (pregnant women)                                                         |                                                                                                 |
| 32 | Basic ANC                                                                                                 |                                                                                                 |
| 33 | Breast feeding education and advices                                                                      |                                                                                                 |
| 34 | Pregnancy care - Treatment of pregnancy complications                                                     |                                                                                                 |
| 35 | Deworming (pregnant women)                                                                                | Assumption: 100%                                                                                |
| 36 | Postpartum care - Other                                                                                   |                                                                                                 |

|                                                |                                                                                   |
|------------------------------------------------|-----------------------------------------------------------------------------------|
| Mastitis                                       | Assumption derived from UHC Service Coverage Sub-Index on RMCH (WHO) <sup>2</sup> |
| Breast feeding education and advices           |                                                                                   |
| Treatment of postpartum haemorrhage            | Assumption: 100%                                                                  |
| Other sexual and reproductive health           |                                                                                   |
| Treatment of urinary tract infection (UTI)     | Assumption derived from UHC Service Coverage Index (WHO) <sup>2</sup>             |
| Identification and management of infertility   |                                                                                   |
| Treatment of syphilis                          |                                                                                   |
| Treatment of gonorrhoea                        |                                                                                   |
| Treatment of chlamydia                         |                                                                                   |
| Treatment of trichomoniasis                    |                                                                                   |
| Treatment of PID (Pelvic Inflammatory Disease) |                                                                                   |
| General Practice                               |                                                                                   |
| General Practice                               | MOH Health Statistics 2019 <sup>4</sup>                                           |
| Oral Care                                      |                                                                                   |
| Dental cleaning and preventive care            | MOH Health Statistics 2019 <sup>4</sup>                                           |

**Table S5. References and assumptions used to estimate the total number of services delivered in 2019 in Kuwait**

|                             |                                         |
|-----------------------------|-----------------------------------------|
| Immunization                |                                         |
| Rotavirus vaccine           | MOH Health Statistics 2019 <sup>5</sup> |
| Measles vaccine             |                                         |
| Pentavalent vaccine         |                                         |
| DPT vaccine                 |                                         |
| Polio vaccine               |                                         |
| BCG vaccine                 |                                         |
| Pneumococcal vaccine        |                                         |
| Varicella vaccine           |                                         |
| DT Adult                    |                                         |
| Measles vaccine             |                                         |
| Varicella vaccine           |                                         |
| Influenza vaccine           |                                         |
| Meningococcal vaccine       |                                         |
| DT paediatrics              |                                         |
| Anti-Rabies                 |                                         |
| Heb B vaccine (paediatrics) |                                         |
| TT                          |                                         |

|    |                                                                                              |                                                                                   |
|----|----------------------------------------------------------------------------------------------|-----------------------------------------------------------------------------------|
| 1  | Non-Communicable Diseases                                                                    |                                                                                   |
| 2  |                                                                                              |                                                                                   |
| 3  | CVD & Diabetes                                                                               |                                                                                   |
| 4  |                                                                                              |                                                                                   |
| 5  | Screening for risk of CVD/Diabetes                                                           | Assumption: CR = 5.0%                                                             |
| 6  |                                                                                              |                                                                                   |
| 7  | Follow-up care for those at low risk of CVD/Diabetes (Absolute Risk: 10-20%)                 | Assumption derived from UHC Service Coverage Sub-Index on NCDs (WHO) <sup>2</sup> |
| 8  | Treatment for those with very high cholesterol but low absolute risk of CVD/Diabetes (< 20%) |                                                                                   |
| 9  | Treatment for those with high blood pressure but low absolute risk of CVD/Diabetes (< 20%)   |                                                                                   |
| 10 | Treatment for those with absolute risk of CVD/Diabetes 20-30%                                |                                                                                   |
| 11 | Treatment for those with high absolute risk of CVD/Diabetes (>30%)                           |                                                                                   |
| 12 | Treatment of new cases of acute myocardial infarction (AMI) with aspirin                     | Provided by MOH                                                                   |
| 13 | Treatment of cases with established ischaemic heart disease (IHD)                            |                                                                                   |
| 14 | Treatment for those with established cerebrovascular disease and post stroke                 |                                                                                   |
| 15 | Standard glycaemic control                                                                   | Estimate from MOH Health Statistics 2019 <sup>6</sup>                             |
| 16 | Intensive glycaemic control                                                                  |                                                                                   |
| 17 | Retinopathy screening                                                                        |                                                                                   |
| 18 | Neuropathy screening and preventive foot care                                                |                                                                                   |
| 19 | Breast Cancer                                                                                |                                                                                   |
| 20 | Basic breast cancer awareness                                                                | Assumption: CR = 5.0%                                                             |
| 21 | Screening: clinical breast examination                                                       | Assumption derived from Oman                                                      |
| 22 | Diagnosis after screened with clinical breast exam                                           | Estimate from WHO-IARC 2020 <sup>3</sup>                                          |
| 23 | Cervical Cancer                                                                              |                                                                                   |
| 24 | Papanicolaou test (pap smear)                                                                | Provided by MOH                                                                   |
| 25 | Colorectal Cancer                                                                            |                                                                                   |
| 26 | Screening: faecal occult blood testing                                                       | Provided by MOH                                                                   |
| 27 | Respiratory Disease                                                                          |                                                                                   |
| 28 | Asthma: inhaled short acting beta agonist for intermittent asthma                            | Estimation from data provided by MOH                                              |
| 29 | Asthma: low dose inhaled beclomethasone + SABA                                               |                                                                                   |
| 30 | Asthma: high dose inhaled beclomethasone + SABA                                              |                                                                                   |
| 31 | COPD: smoking cessation                                                                      |                                                                                   |
| 32 | COPD: inhaled salbutamol                                                                     |                                                                                   |
| 33 | COPD: low-dose oral theophylline                                                             |                                                                                   |
| 34 | COPD: ipratropium inhaler                                                                    |                                                                                   |
| 35 | COPD: exacerbation treatment with antibiotics                                                |                                                                                   |
| 36 | COPD: exacerbation treatment with oral prednisolone                                          |                                                                                   |
| 37 | Emergency care                                                                               |                                                                                   |
| 38 | Average annual emergency care needs                                                          | N/A                                                                               |
| 39 | Child Health                                                                                 |                                                                                   |



|                                                                                                           |                                                                                   |
|-----------------------------------------------------------------------------------------------------------|-----------------------------------------------------------------------------------|
| General Health                                                                                            |                                                                                   |
| Child general health                                                                                      | MOH Health Statistics 2019 <sup>6</sup>                                           |
| Deworming                                                                                                 |                                                                                   |
| Deworming                                                                                                 | Provided by MOH                                                                   |
| Diarrhea management                                                                                       |                                                                                   |
| ORS                                                                                                       | Estimate based on data provided by MOH                                            |
| Pneumonia                                                                                                 |                                                                                   |
| Pneumonia treatment (children)                                                                            | Provided by MOH                                                                   |
| Nutrition                                                                                                 |                                                                                   |
| Women of reproductive age and adolescent girls                                                            |                                                                                   |
| Intermittent iron-folic acid supplementation                                                              | Estimate from data provided by MOH                                                |
| Pregnant and lactating women                                                                              |                                                                                   |
| Daily iron and folic acid supplementation (pregnant women)                                                | Assumption derived from UHC Service Coverage Sub-Index on MRCH (WHO) <sup>2</sup> |
| Intermittent iron and folic acid supplementation (non-anaemic pregnant women)                             |                                                                                   |
| Adults                                                                                                    |                                                                                   |
| Care for adults with low BMI                                                                              | Assumption derived from Bahrain                                                   |
| Children                                                                                                  |                                                                                   |
| Breastfeeding counselling and support                                                                     | Assumption derived from UHC Service Coverage Sub-Index on MRCH (WHO) <sup>2</sup> |
| Complementary feeding counselling and support                                                             |                                                                                   |
| Intermittent iron supplementation in children                                                             | Assumption derived from UHC Service Coverage Index (WHO) <sup>2</sup>             |
| Mental Health                                                                                             |                                                                                   |
| Anxiety Disorders                                                                                         |                                                                                   |
| Basic psychological treatment for anxiety disorders (mild cases).                                         | OneHealth Tool <sup>7</sup>                                                       |
| Basic psychosocial treatment and anti-depressant medication for anxiety disorders (moderate-severe cases) |                                                                                   |
| Depression                                                                                                |                                                                                   |
| Basic psychosocial treatment for mild depression                                                          | OneHealth Tool <sup>7</sup>                                                       |
| Basic psychosocial treatment and anti-depressant medication of first episode moderate-severe cases        |                                                                                   |
| Maternal Newborn and Reproductive Health                                                                  |                                                                                   |
| Family planning                                                                                           |                                                                                   |
| Pill - Progestin only                                                                                     | United Nations 2019 <sup>5</sup>                                                  |
| Injectable - 3 month (depo provera)                                                                       |                                                                                   |
| Other contraceptives                                                                                      |                                                                                   |
| IUCD follow-up care                                                                                       | Assumption derived from UHC Service Coverage Index (WHO) <sup>2</sup>             |
| Management of abortion complications                                                                      |                                                                                   |
| Post-abortion case management                                                                             | Assumption (70.0%)                                                                |
| Pregnancy Care                                                                                            |                                                                                   |

|                                                       |                                                                       |
|-------------------------------------------------------|-----------------------------------------------------------------------|
| Tetanus toxoid (pregnant women)                       | Estimate based on data provided by MOH.                               |
| Syphilis detection and treatment (pregnant women)     |                                                                       |
| Basic ANC                                             |                                                                       |
| Breast feeding education and advices                  |                                                                       |
| Pregnancy care - Treatment of pregnancy complications |                                                                       |
| Deworming (pregnant women)                            | Assumption (100.0%)                                                   |
| Postpartum care - Other                               |                                                                       |
| Mastitis                                              | Assumption derived from UHC Service Coverage Index (WHO) <sup>2</sup> |
| Breast feeding education and advices                  |                                                                       |
| Treatment of postpartum haemorrhage                   | Estimate based on data provided by MOH.                               |
| Other sexual and reproductive health                  |                                                                       |
| Treatment of urinary tract infection (UTI)            | Provided by MOH                                                       |
| Cervical cancer screening                             |                                                                       |
| Identification and management of infertility          |                                                                       |
| Treatment of syphilis                                 | Estimate based on data provided by MOH                                |
| Treatment of gonorrhoea                               | Provided by MOH                                                       |
| Treatment of chlamydia                                | Estimate based on data provided by MOH                                |
| Treatment of trichomoniasis                           |                                                                       |
| Treatment of PID (Pelvic Inflammatory Disease)        | Provided by MOH                                                       |
| Other                                                 |                                                                       |
| Management of pre pubertal problems                   | Provided by MOH                                                       |
| Management of PCO                                     |                                                                       |
| Management of hirsutism                               | Estimate based on data provided by MOH                                |
| Management of irregular cycles                        | Provided by MOH                                                       |
| Management of amenorrhoea                             |                                                                       |
| Management of abnormal uterine bleeding               |                                                                       |
| Management of mild endometriosis                      |                                                                       |
| Postmenopausal care                                   |                                                                       |
| General Practice                                      |                                                                       |
| General Practice                                      | MOH Health Statistics 2019 <sup>6</sup>                               |
| Oral Care                                             |                                                                       |
| Dental cleaning and preventive care                   | MOH Health Statistics 2019 <sup>6</sup>                               |

**Table S6. References and assumptions used to estimate the total number of services delivered in 2019 in Qatar**

|                                                                                              |                                                                    |
|----------------------------------------------------------------------------------------------|--------------------------------------------------------------------|
| Immunization                                                                                 |                                                                    |
| Rotavirus vaccine                                                                            | Global Health Observatory (WHO) <sup>2</sup>                       |
| Measles vaccine                                                                              | Qatar Health Statistics 2019 <sup>8</sup>                          |
| DPT vaccine                                                                                  |                                                                    |
| Hib vaccine                                                                                  |                                                                    |
| Hep B vaccine                                                                                |                                                                    |
| Polio vaccine                                                                                |                                                                    |
| BCG vaccine                                                                                  |                                                                    |
| Pneumococcal vaccine                                                                         |                                                                    |
| Varicella vaccine                                                                            |                                                                    |
| Influenza vaccine                                                                            | Assumption derived from GCC countries                              |
| Non-Communicable Diseases                                                                    |                                                                    |
| CVD & Diabetes                                                                               |                                                                    |
| Screening for risk of CVD/Diabetes                                                           | Assumption: 5%                                                     |
| Follow-up care for those at low risk of CVD/Diabetes (Absolute Risk: 10-20%)                 | Estimate from PHCC Official Statistics                             |
| Treatment for those with very high cholesterol but low absolute risk of CVD/Diabetes (< 20%) |                                                                    |
| Treatment for those with high blood pressure but low absolute risk of CVD/Diabetes (< 20%)   |                                                                    |
| Treatment for those with absolute risk of CVD/Diabetes 20-30%                                |                                                                    |
| Treatment for those with high absolute risk of CVD/Diabetes (>30%)                           |                                                                    |
| Treatment of new cases of acute myocardial infarction (AMI) with aspirin                     |                                                                    |
| Treatment of cases with established ischaemic heart disease (IHD)                            |                                                                    |
| Treatment for those with established cerebrovascular disease and post stroke                 |                                                                    |
| Treatment of cases with rheumatic heart disease (with benzathine penicillin)                 |                                                                    |
| Standard glycaemic control                                                                   |                                                                    |
| Intensive glycaemic control                                                                  |                                                                    |
| Retinopathy screening                                                                        | Assumption: 1%                                                     |
| Neuropathy screening and preventive foot care                                                | Assumption: 1%                                                     |
| Breast Cancer                                                                                |                                                                    |
| Basic breast cancer awareness                                                                | Assumption: 5%                                                     |
| Screening: Clinical Breast Examination                                                       | Assumption derived from GCC countries and PHCC Official Statistics |
| Cervical Cancer                                                                              |                                                                    |
| Papanicolaou test (Pap smear)                                                                | Assumption derived from GCC countries and PHCC Official Statistics |
| Colorectal Cancer                                                                            |                                                                    |
| Screening: Fecal occult blood testing                                                        | Assumption derived from GCC countries and PHCC Official Statistics |
| Allied Health                                                                                |                                                                    |
| Allied Health                                                                                | PHCC Official Statistics                                           |

|    |                                                                                                           |                                                                                         |
|----|-----------------------------------------------------------------------------------------------------------|-----------------------------------------------------------------------------------------|
| 1  | Respiratory Disease                                                                                       |                                                                                         |
| 2  |                                                                                                           |                                                                                         |
| 3  | Asthma: Inhaled short acting beta agonist for intermittent asthma                                         | PHCC Official Statistics                                                                |
| 4  | Asthma: Low dose inhaled beclomethasone + SABA                                                            |                                                                                         |
| 5  | Asthma: High dose inhaled beclomethasone + SABA                                                           |                                                                                         |
| 6  | COPD: Smoking cessation                                                                                   |                                                                                         |
| 7  | COPD: Inhaled salbutamol                                                                                  |                                                                                         |
| 8  | COPD: Low-dose oral theophylline                                                                          |                                                                                         |
| 9  | COPD: Ipratropium inhaler                                                                                 |                                                                                         |
| 10 | COPD: exacerbation treatment with antibiotics                                                             |                                                                                         |
| 11 | COPD: exacerbation treatment with oral prednisolone                                                       |                                                                                         |
| 12 | Emergency care                                                                                            |                                                                                         |
| 13 | Average annual emergency care needs                                                                       | N/A                                                                                     |
| 14 | Child Health                                                                                              |                                                                                         |
| 15 | General Health                                                                                            |                                                                                         |
| 16 | Child General Health                                                                                      | Estimate from PHCC Official Statistics                                                  |
| 17 | General Health                                                                                            |                                                                                         |
| 18 | School Health                                                                                             | PHCC Official Statistics                                                                |
| 19 | Deworming                                                                                                 |                                                                                         |
| 20 | Deworming                                                                                                 | PHCC Official Statistics                                                                |
| 21 | Diarrhea management                                                                                       |                                                                                         |
| 22 | ORS                                                                                                       | Assumption derived from UHC Service Coverage Index for Infectious Diseases <sup>2</sup> |
| 23 | Pneumonia                                                                                                 |                                                                                         |
| 24 | Pneumonia treatment (children)                                                                            | Assumption derived from UHC Service Coverage Index for Infectious Diseases <sup>2</sup> |
| 25 | Nutrition                                                                                                 |                                                                                         |
| 26 | Women of reproductive age and adolescent girls                                                            |                                                                                         |
| 27 | Intermittent iron-folic acid supplementation                                                              | Assumption: 50%                                                                         |
| 28 | Pregnant and lactating women                                                                              |                                                                                         |
| 29 | Daily iron and folic acid supplementation (pregnant women)                                                | Estimate from data provided by PHCC Official Statistics and World Bank <sup>9</sup>     |
| 30 | Intermittent iron and folic acid supplementation (non-anaemic pregnant women)                             |                                                                                         |
| 31 | Adults                                                                                                    |                                                                                         |
| 32 | Care for adults with low BMI                                                                              | Assumption: 2.5%                                                                        |
| 33 | Children                                                                                                  |                                                                                         |
| 34 | Breastfeeding counselling and support                                                                     | Assumption: 70%                                                                         |
| 35 | Intermittent iron supplementation in children                                                             | Assumption derived from Zainel et al. (2018) <sup>10</sup>                              |
| 36 | Mental Health                                                                                             |                                                                                         |
| 37 | Anxiety Disorders                                                                                         |                                                                                         |
| 38 | Basic psychological treatment for anxiety disorders (mild cases).                                         | PHCC Official Statistics                                                                |
| 39 | Basic psychosocial treatment and anti-depressant medication for anxiety disorders (moderate-severe cases) |                                                                                         |
| 40 | Depression                                                                                                |                                                                                         |

|                                                                                                    |                                        |
|----------------------------------------------------------------------------------------------------|----------------------------------------|
| Basic psychosocial treatment for mild depression                                                   | PHCC Official Statistics               |
| Basic psychosocial treatment and anti-depressant medication of first episode moderate-severe cases |                                        |
| Maternal Newborn and Reproductive Health                                                           |                                        |
| Family planning                                                                                    |                                        |
| Contraception Management                                                                           | Estimate from PHCC Official Statistics |
| Management of abortion complications                                                               |                                        |
| Post-abortion case management                                                                      | Estimate from PHCC Official Statistics |
| Pregnancy Care                                                                                     |                                        |
| Tetanus toxoid (pregnant women)                                                                    | Estimate from PHCC Official Statistics |
| Syphilis detection and treatment (pregnant women)                                                  |                                        |
| Basic ANC                                                                                          |                                        |
| Breast feeding education and advices                                                               |                                        |
| Postpartum care - Other                                                                            |                                        |
| Postpartum Care Examination                                                                        | PHCC Official Statistics               |
| Treatment of postpartum haemorrhage                                                                |                                        |
| Other sexual and reproductive health                                                               |                                        |
| Treatment of urinary tract infection (UTI)                                                         | PHCC Official Statistics               |
| Identification and management of infertility                                                       |                                        |
| Treatment of syphilis                                                                              |                                        |
| Treatment of gonorrhoea                                                                            |                                        |
| Treatment of chlamydia                                                                             |                                        |
| Treatment of trichomoniasis                                                                        |                                        |
| Treatment of PID (Pelvic Inflammatory Disease)                                                     |                                        |
| General Practice                                                                                   |                                        |
| General Practice                                                                                   | PHCC Official Statistics               |
| Oral Care and Cancer                                                                               |                                        |
| Dental cleaning and preventive care                                                                | PHCC Official Statistics               |

**Table S7. References and assumptions used to estimate the total number of services delivered in 2019 in UAE**

|                      |                                         |
|----------------------|-----------------------------------------|
| Immunization         | WHO-UNICEF Estimates 2019 <sup>11</sup> |
| Rotavirus vaccine    |                                         |
| Measles vaccine      |                                         |
| DPT vaccine          |                                         |
| Hib vaccine          |                                         |
| Hep B vaccine        |                                         |
| Polio vaccine        |                                         |
| BCG vaccine          |                                         |
| Pneumococcal vaccine |                                         |

|    |                                                                                              |                                                                                   |                                                                                                                 |
|----|----------------------------------------------------------------------------------------------|-----------------------------------------------------------------------------------|-----------------------------------------------------------------------------------------------------------------|
| 1  | HPV vaccine                                                                                  | HPV Information Centre <sup>12</sup>                                              |                                                                                                                 |
| 2  | Influenza vaccine                                                                            | Assumption derived from Bahrain                                                   |                                                                                                                 |
| 3  | Non-Communicable Diseases                                                                    |                                                                                   |                                                                                                                 |
| 4  | CVD & Diabetes                                                                               |                                                                                   |                                                                                                                 |
| 5  | Screening for risk of CVD/Diabetes                                                           | Assumption: 5.0%                                                                  |                                                                                                                 |
| 6  | Follow-up care for those at low risk of CVD/Diabetes (Absolute Risk: 10-20%)                 | Assumption: 5.0%                                                                  |                                                                                                                 |
| 7  | Treatment for those with very high cholesterol but low absolute risk of CVD/Diabetes (< 20%) | Assumption derived from UHC Service Coverage Sub-Index on NCDs (WHO) <sup>2</sup> |                                                                                                                 |
| 8  | Treatment for those with high blood pressure but low absolute risk of CVD/Diabetes (< 20%)   |                                                                                   |                                                                                                                 |
| 9  | Treatment for those with absolute risk of CVD/Diabetes 20-30%                                |                                                                                   |                                                                                                                 |
| 10 | Treatment for those with high absolute risk of CVD/Diabetes (>30%)                           |                                                                                   |                                                                                                                 |
| 11 | Treatment of new cases of acute myocardial infarction (AMI) with aspirin                     |                                                                                   |                                                                                                                 |
| 12 | Treatment of cases with established ischaemic heart disease (IHD)                            |                                                                                   |                                                                                                                 |
| 13 | Treatment for those with established cerebrovascular disease and post stroke                 |                                                                                   |                                                                                                                 |
| 14 | Treatment of cases with rheumatic heart disease (with benzathine penicillin)                 |                                                                                   |                                                                                                                 |
| 15 | Standard glycaemic control                                                                   |                                                                                   | Estimate from OneHealth Tool <sup>7</sup> and Dubai Government Annual Health Statistics Book 2019 <sup>13</sup> |
| 16 | Intensive glycaemic control                                                                  |                                                                                   |                                                                                                                 |
| 17 | Retinopathy screening                                                                        |                                                                                   |                                                                                                                 |
| 18 | Neuropathy screening and preventive foot care                                                |                                                                                   |                                                                                                                 |
| 19 | Breast Cancer                                                                                |                                                                                   |                                                                                                                 |
| 20 | Basic breast cancer awareness                                                                | Assumption: 5.0%                                                                  |                                                                                                                 |
| 21 | Screening: Clinical Breast Examination                                                       | Estimate from Bahrain                                                             |                                                                                                                 |
| 22 | Screening: Mammography                                                                       | Assumption: 0.9%                                                                  |                                                                                                                 |
| 23 | Diagnosis after Screened with Clinical Breast Exam                                           | Estimation from WHO IARC 2020 <sup>3</sup>                                        |                                                                                                                 |
| 24 | Diagnosis after Screened with Mammography                                                    |                                                                                   |                                                                                                                 |
| 25 | Diagnosis without screening for breast cancer                                                |                                                                                   |                                                                                                                 |
| 26 | Cervical Cancer                                                                              |                                                                                   |                                                                                                                 |
| 27 | Visual inspection with acetic acid (VIA)                                                     | Assumption: 5.0%                                                                  |                                                                                                                 |
| 28 | Papanicolaou test (Pap smear)                                                                | Assumption: 9.3%                                                                  |                                                                                                                 |
| 29 | HPV DNA + VIA                                                                                | Assumption: 5.0%                                                                  |                                                                                                                 |
| 30 | Colorectal Cancer                                                                            |                                                                                   |                                                                                                                 |
| 31 | Screening: faecal immunochemical test                                                        | Assumption : 0.5%                                                                 |                                                                                                                 |
| 32 | Screening: faecal occult blood testing                                                       |                                                                                   |                                                                                                                 |
| 33 | Diagnosis for colorectal cancer screened with FIT                                            | Assumption: 100%                                                                  |                                                                                                                 |
| 34 | Diagnosis for colorectal cancer screened with FOBT                                           |                                                                                   |                                                                                                                 |
| 35 | Diagnosis without screening for colorectal cancer (symptom based)                            |                                                                                   |                                                                                                                 |
| 36 | Respiratory Disease                                                                          |                                                                                   |                                                                                                                 |
| 37 | Asthma: Inhaled short acting beta agonist for intermittent asthma                            | Assumption derived from UHC Service Coverage Sub-Index on NCDs (WHO) <sup>3</sup> |                                                                                                                 |
| 38 | Asthma: Low dose inhaled beclomethasone + SABA                                               |                                                                                   |                                                                                                                 |

|    |                                                                                                           |                                                                            |
|----|-----------------------------------------------------------------------------------------------------------|----------------------------------------------------------------------------|
| 1  |                                                                                                           |                                                                            |
| 2  |                                                                                                           |                                                                            |
| 3  | Asthma: High dose inhaled beclomethasone + SABA                                                           |                                                                            |
| 4  |                                                                                                           |                                                                            |
| 5  | COPD: Smoking cessation                                                                                   |                                                                            |
| 6  | COPD: Inhaled salbutamol                                                                                  |                                                                            |
| 7  |                                                                                                           |                                                                            |
| 8  | COPD: Ipratropium inhaler                                                                                 |                                                                            |
| 9  | COPD: exacerbation treatment with antibiotics                                                             |                                                                            |
| 10 |                                                                                                           |                                                                            |
| 11 | COPD: exacerbation treatment with oral prednisolone                                                       |                                                                            |
| 12 | COPD: exacerbation treatment with oxygen                                                                  |                                                                            |
| 13 |                                                                                                           |                                                                            |
| 14 | Emergency care                                                                                            |                                                                            |
| 15 | Average annual emergency care needs                                                                       | N/A                                                                        |
| 16 |                                                                                                           |                                                                            |
| 17 | Oral Care                                                                                                 |                                                                            |
| 18 | Oral and dental care                                                                                      | Estimate from Dubai Government Annual Health Statistics Book <sup>13</sup> |
| 19 |                                                                                                           |                                                                            |
| 20 | Child Health                                                                                              |                                                                            |
| 21 | General Health (Children)                                                                                 |                                                                            |
| 22 | General Health (Children)                                                                                 | Assumption: 25% of GP visits                                               |
| 23 |                                                                                                           |                                                                            |
| 24 | Diarrhea management                                                                                       |                                                                            |
| 25 | ORS                                                                                                       |                                                                            |
| 26 |                                                                                                           | Assumption derived from UHC Service Coverage Index (WHO) <sup>2</sup>      |
| 27 | Antibiotics for treatment of dysentery                                                                    |                                                                            |
| 28 | Pneumonia                                                                                                 |                                                                            |
| 29 | Pneumonia treatment (children)                                                                            | Assumption derived from UHC Service Coverage Index (WHO) <sup>2</sup>      |
| 30 |                                                                                                           |                                                                            |
| 31 | Routine Child Health Care Visit                                                                           |                                                                            |
| 32 | Routine Child Health Care Visit (< 1 year)                                                                |                                                                            |
| 33 |                                                                                                           | Assumption derived from UHC Service Coverage Index (WHO) <sup>2</sup>      |
| 34 | Routine Child Health Care Visit (1-5 years)                                                               |                                                                            |
| 35 |                                                                                                           |                                                                            |
| 36 | Nutrition                                                                                                 |                                                                            |
| 37 | Adults                                                                                                    |                                                                            |
| 38 | Care for Obese adults                                                                                     |                                                                            |
| 39 | Care for Diabetic adults                                                                                  |                                                                            |
| 40 | Care for adults with hyperuricemia                                                                        |                                                                            |
| 41 |                                                                                                           | Assumption: 5.0%                                                           |
| 42 | Care for adults with kidney diseases                                                                      |                                                                            |
| 43 | Care for adults with nutritional anaemia                                                                  |                                                                            |
| 44 | Care for adults with food allergies and sensitivities                                                     |                                                                            |
| 45 |                                                                                                           |                                                                            |
| 46 | All populations                                                                                           |                                                                            |
| 47 |                                                                                                           |                                                                            |
| 48 | Food fortification                                                                                        | Assumption: 100%                                                           |
| 49 |                                                                                                           |                                                                            |
| 50 | Children                                                                                                  |                                                                            |
| 51 | Management of severe malnutrition                                                                         |                                                                            |
| 52 |                                                                                                           | Assumption derived from UHC Service Coverage Index (WHO) <sup>2</sup>      |
| 53 | Management of moderate acute malnutrition                                                                 |                                                                            |
| 54 | Management of Food allergies or Food intolerances                                                         | Assumption: 5.0%                                                           |
| 55 |                                                                                                           |                                                                            |
| 56 | Mental Health                                                                                             |                                                                            |
| 57 | Anxiety Disorders                                                                                         |                                                                            |
| 58 |                                                                                                           |                                                                            |
| 59 | Basic psychosocial treatment and anti-depressant medication for anxiety disorders (moderate-severe cases) | Estimate from Abu Dhabi Government Annual Health Statistics <sup>14</sup>  |
| 60 |                                                                                                           |                                                                            |

|    |                                                                                                                           |                                                                                   |
|----|---------------------------------------------------------------------------------------------------------------------------|-----------------------------------------------------------------------------------|
| 1  | Basic psychological treatment for anxiety disorders (mild cases).                                                         |                                                                                   |
| 2  |                                                                                                                           |                                                                                   |
| 3  | Depression                                                                                                                |                                                                                   |
| 4  |                                                                                                                           |                                                                                   |
| 5  | Basic psychosocial treatment for mild depression                                                                          | Estimate from Abu Dhabi Government Annual Health Statistics <sup>14</sup>         |
| 6  | Basic psychosocial treatment and anti-depressant medication of first episode moderate-severe cases                        |                                                                                   |
| 7  | Intensive psychosocial treatment and anti-depressant medication of recurrent moderate-severe cases on a maintenance basis |                                                                                   |
| 8  | Psychological care for peri-natal                                                                                         |                                                                                   |
| 9  | Psychosis                                                                                                                 |                                                                                   |
| 10 | Basic psychosocial support and anti-psychotic medication                                                                  | Estimate from Abu Dhabi Government Annual Health Statistics <sup>14</sup>         |
| 11 | Bipolar Disorders                                                                                                         |                                                                                   |
| 12 | Basic psychosocial treatment, advice, and follow-up for bipolar disorder, plus mood-stabilizing medication                | Estimate from Abu Dhabi Government Annual Health Statistics <sup>14</sup>         |
| 13 | Epilepsy                                                                                                                  |                                                                                   |
| 14 | Basic psychosocial support, advice, and follow-up, plus anti-epileptic medication                                         | Estimate from Abu Dhabi Government Annual Health Statistics <sup>14</sup>         |
| 15 | Developmental Disorders                                                                                                   |                                                                                   |
| 16 | Basic psychosocial treatment, advice, and follow-up for developmental disorders                                           | Estimate from Abu Dhabi Government Annual Health Statistics <sup>14</sup>         |
| 17 | Conduct Disorders                                                                                                         |                                                                                   |
| 18 | Basic psychosocial treatment, advice, and follow-up for behavioural disorders                                             | Estimate from Abu Dhabi Government Annual Health Statistics <sup>14</sup>         |
| 19 | Attention Disorders                                                                                                       |                                                                                   |
| 20 | Methylphenidate medication                                                                                                | Estimate from Abu Dhabi Government Annual Health Statistics <sup>14</sup>         |
| 21 | Dementia                                                                                                                  |                                                                                   |
| 22 | Assessment, diagnosis, advice, and follow-up for dementia                                                                 | Estimate from Abu Dhabi Government Annual Health Statistics <sup>14</sup>         |
| 23 | Pharmacological treatment of dementia                                                                                     |                                                                                   |
| 24 | Alcohol Use/Dependence                                                                                                    |                                                                                   |
| 25 | Identification and assessment of new cases of alcohol use/dependence                                                      | Estimate from Abu Dhabi Government Annual Health Statistics <sup>14</sup>         |
| 26 | Drug Use/Dependence                                                                                                       |                                                                                   |
| 27 | Brief interventions and follow-up for drug use/dependence                                                                 | Estimate from Abu Dhabi Government Annual Health Statistics <sup>14</sup>         |
| 28 | Maternal Newborn and Reproductive Health                                                                                  |                                                                                   |
| 29 | Preconception Care (PCC)                                                                                                  |                                                                                   |
| 30 | Preconception Care (PCC)                                                                                                  | Assumption derived from UHC Service Coverage Sub-Index on MNCH (WHO) <sup>2</sup> |
| 31 | Antenatal Care (ANC)                                                                                                      |                                                                                   |
| 32 | Antenatal Care (ANC)                                                                                                      | Assumption: 99% ANC Coverage                                                      |
| 33 | Postnatal Care (PNC)                                                                                                      |                                                                                   |
| 34 | Postnatal Care (PNC)                                                                                                      | Assumption derived from UHC Service Coverage Sub-Index on MNCH (WHO) <sup>2</sup> |
| 35 | Premarital screening program                                                                                              |                                                                                   |
| 36 | Premarital screening program                                                                                              | Assumption: 100%                                                                  |
| 37 | General Practice                                                                                                          |                                                                                   |
| 38 | General Practice                                                                                                          | Estimate from Dubai Government Annual Health Statistics Book <sup>13</sup>        |
| 39 |                                                                                                                           |                                                                                   |
| 40 |                                                                                                                           |                                                                                   |
| 41 |                                                                                                                           |                                                                                   |
| 42 |                                                                                                                           |                                                                                   |
| 43 |                                                                                                                           |                                                                                   |
| 44 |                                                                                                                           |                                                                                   |
| 45 |                                                                                                                           |                                                                                   |
| 46 |                                                                                                                           |                                                                                   |
| 47 |                                                                                                                           |                                                                                   |
| 48 |                                                                                                                           |                                                                                   |
| 49 |                                                                                                                           |                                                                                   |
| 50 |                                                                                                                           |                                                                                   |
| 51 |                                                                                                                           |                                                                                   |
| 52 |                                                                                                                           |                                                                                   |
| 53 |                                                                                                                           |                                                                                   |
| 54 |                                                                                                                           |                                                                                   |
| 55 |                                                                                                                           |                                                                                   |
| 56 |                                                                                                                           |                                                                                   |
| 57 |                                                                                                                           |                                                                                   |
| 58 |                                                                                                                           |                                                                                   |
| 59 |                                                                                                                           |                                                                                   |
| 60 |                                                                                                                           |                                                                                   |



**Table S8. References and assumptions used to estimate the total number of services delivered in 2019 in KSA**

|                                                                                              |                                                                                   |
|----------------------------------------------------------------------------------------------|-----------------------------------------------------------------------------------|
| Immunization                                                                                 |                                                                                   |
| Measles vaccine                                                                              | MOH Statistical Yearbook 2019 <sup>15</sup>                                       |
| Pentavalent vaccine                                                                          |                                                                                   |
| Varicella vaccine                                                                            | Estimate from MOH Statistical Yearbook 2019 <sup>15</sup>                         |
| Polio vaccine                                                                                | MOH Statistical Yearbook 2019 <sup>15</sup>                                       |
| BCG vaccine                                                                                  |                                                                                   |
| Rubella vaccine                                                                              |                                                                                   |
| Pneumococcal vaccine                                                                         |                                                                                   |
| HPV vaccine                                                                                  | Assumption: 5.0%                                                                  |
| Non-Communicable Diseases                                                                    |                                                                                   |
| CVD & Diabetes                                                                               |                                                                                   |
| Screening for risk of CVD/Diabetes                                                           | Assumption: 5.0%                                                                  |
| Follow-up care for those at low risk of CVD/Diabetes (Absolute Risk: 10-20%)                 | Assumption: 5.0%                                                                  |
| Treatment for those with very high cholesterol but low absolute risk of CVD/Diabetes (< 20%) | Estimate from MOH Statistical Yearbook 2019 <sup>15</sup>                         |
| Treatment for those with high blood pressure but low absolute risk of CVD/Diabetes (< 20%)   |                                                                                   |
| Treatment for those with absolute risk of CVD/Diabetes 20-30%                                |                                                                                   |
| Treatment for those with high absolute risk of CVD/Diabetes (>30%)                           |                                                                                   |
| Treatment of new cases of acute myocardial infarction (AMI) with aspirin                     |                                                                                   |
| Treatment of cases with established ischaemic heart disease (IHD)                            | KSA World Health Survey <sup>16</sup>                                             |
| Treatment for those with established cerebrovascular disease and post stroke                 |                                                                                   |
| Treatment of cases with rheumatic heart disease (with benzathine penicillin)                 | Assumption derived from UHC Service Coverage Sub-Index on NCDs (WHO) <sup>2</sup> |
| Standard glycaemic control                                                                   | Estimate from MOH Statistical Yearbook 2019 <sup>15</sup>                         |
| Intensive glycaemic control                                                                  |                                                                                   |
| Neuropathy screening and preventive foot care                                                |                                                                                   |
| Breast Cancer                                                                                |                                                                                   |
| Basic breast cancer awareness                                                                | Assumption: 5.0%                                                                  |
| Screening: Clinical Breast Examination                                                       | Assumption derived from Bahrain                                                   |
| Screening: Mammography                                                                       | KSA World Health Survey <sup>16</sup>                                             |
| Diagnosis: Screened with clinical breast exam                                                | Estimate from WHO IARC 2020 <sup>3</sup>                                          |
| Diagnosis: Screened with mammogram                                                           |                                                                                   |
| Post-treatment surveillance for breast cancer patients                                       | Assumption derived from UHC Service Coverage Sub-Index on NCDs (WHO) <sup>2</sup> |
| Cervical Cancer                                                                              |                                                                                   |
| Papanicolaou test (Pap smear)                                                                | KSA World Health Survey <sup>16</sup>                                             |
| Post treatment surveillance for cervical cancer                                              | Assumption derived from UHC Service Coverage Sub-Index on NCDs (WHO) <sup>2</sup> |
| Colorectal Cancer                                                                            |                                                                                   |

|    |                                                                                 |                                                                                   |
|----|---------------------------------------------------------------------------------|-----------------------------------------------------------------------------------|
| 1  | Screening: faecal occult blood testing                                          | Estimate from Aljumah and Aljebreen (2017) <sup>17</sup>                          |
| 2  | Screening: Sigmoidoscopy                                                        |                                                                                   |
| 3  | Screening: Colonoscopy                                                          |                                                                                   |
| 4  | Diagnosis for colorectal cancer screened with FOBT                              | Estimation from WHO IARC 2020 <sup>3</sup>                                        |
| 5  | Diagnosis without screening for colorectal cancer (symptom based)               |                                                                                   |
| 6  | Post treatment surveillance for colorectal cancer                               | Assumption derived from UHC Service Coverage Sub-Index on NCDs (WHO) <sup>2</sup> |
| 7  | Respiratory Disease                                                             | Estimate from MOH Statistical Yearbook 2019 <sup>15</sup>                         |
| 8  | Asthma: Inhaled short acting beta agonist for intermittent asthma               |                                                                                   |
| 9  | Asthma: Low dose inhaled fluticasone + SABA                                     |                                                                                   |
| 10 | Asthma: High dose inhaled fluticasone + SABA                                    |                                                                                   |
| 11 | Asthma: Theophylline + High dose inhaled fluticasone + SABA                     |                                                                                   |
| 12 | Asthma: Oral Prednisolone + Theophylline + High dose inhaled fluticasone + SABA |                                                                                   |
| 13 | COPD: Smoking cessation                                                         |                                                                                   |
| 14 | COPD: Inhaled salbutamol                                                        |                                                                                   |
| 15 | COPD: Low-dose oral theophylline                                                |                                                                                   |
| 16 | COPD: Ipratropium inhaler                                                       |                                                                                   |
| 17 | COPD: exacerbation treatment with antibiotics                                   |                                                                                   |
| 18 | COPD: exacerbation treatment with oral prednisolone                             |                                                                                   |
| 19 | COPD: exacerbation treatment with oxygen                                        |                                                                                   |
| 20 | Emergency care                                                                  | N/A                                                                               |
| 21 | Average annual emergency care needs                                             |                                                                                   |
| 22 | Child Health                                                                    | MOH Statistical Yearbook 2019 <sup>15</sup>                                       |
| 23 | General                                                                         |                                                                                   |
| 24 | General Health (Children)                                                       |                                                                                   |
| 25 | Zinc supplementation                                                            |                                                                                   |
| 26 | Diarrhea management                                                             |                                                                                   |
| 27 | ORS                                                                             |                                                                                   |
| 28 | Zinc (diarrhea treatment)                                                       |                                                                                   |
| 29 | Antibiotics for treatment of dysentery                                          |                                                                                   |
| 30 | Treatment of severe diarrhea                                                    |                                                                                   |
| 31 | Pneumonia                                                                       |                                                                                   |
| 32 | Pneumonia treatment (children, mild cases)                                      | Assumption derived from UHC Service Coverage Index (WHO) <sup>2</sup>             |
| 33 | Treatment of severe pneumonia                                                   |                                                                                   |
| 34 | Nutrition                                                                       | Estimate from Alreshidi et al. (2018) <sup>18</sup>                               |
| 35 | Women of reproductive age and adolescent girls                                  |                                                                                   |
| 36 | Intermittent iron-folic acid supplementation                                    |                                                                                   |
| 37 | Pregnant and lactating women                                                    |                                                                                   |
| 38 | Daily iron and folic acid supplementation (pregnant women)                      |                                                                                   |
| 39 | Intermittent iron and folic acid supplementation (non-anaemic pregnant women)   | Estimate from Al-Duraibi and Am-Mutawa (2020) <sup>19</sup>                       |

|                                                                                                            |                                                                               |
|------------------------------------------------------------------------------------------------------------|-------------------------------------------------------------------------------|
| Vitamin A supplementation in pregnant women                                                                | Estimate from Azzeh and Refaat (2020) <sup>20</sup>                           |
| Iodine supplementation in pregnant women                                                                   |                                                                               |
| Adults                                                                                                     |                                                                               |
| Care for adults with low BMI                                                                               | Assumption derived from Bahrain                                               |
| Children                                                                                                   |                                                                               |
| Breastfeeding counselling and support                                                                      | Assumption derived from Service Coverage Sub-Index on MNCH (WHO) <sup>2</sup> |
| Complementary feeding counselling and support                                                              |                                                                               |
| Management of moderate acute malnutrition (children)                                                       | Assumption derived from UHC Service Coverage Index (WHO) <sup>2</sup>         |
| <b>Mental Health</b>                                                                                       |                                                                               |
| Anxiety disorders                                                                                          |                                                                               |
| Basic psychosocial treatment for anxiety disorders (mild cases)                                            | Assumption: 1.0%                                                              |
| Basic psychosocial treatment and anti-depressant medication for anxiety disorders (moderate-severe cases)  |                                                                               |
| Depression                                                                                                 |                                                                               |
| Basic psychosocial treatment for mild depression                                                           | Assumption: 1.0%                                                              |
| Basic psychosocial treatment and anti-depressant medication of first episode moderate-severe cases         |                                                                               |
| Psychosocial care for peri-natal depression                                                                |                                                                               |
| Psychosis                                                                                                  |                                                                               |
| Basic psychosocial support and anti-psychotic medication                                                   | Assumption: 1.0%                                                              |
| Bipolar disorder                                                                                           |                                                                               |
| Basic psychosocial treatment, advice, and follow-up for bipolar disorder, plus mood-stabilizing medication | Assumption: 1.0%                                                              |
| Epilepsy                                                                                                   |                                                                               |
| Basic psychosocial support, advice, and follow-up, plus anti-epileptic medication                          | Assumption: 1.0%                                                              |
| Developmental disorders                                                                                    |                                                                               |
| Basic psychosocial treatment, advice, and follow-up for developmental disorders                            | Assumption: 1.0%                                                              |
| Conduct disorders                                                                                          |                                                                               |
| Basic psychosocial treatment, advice, and follow-up for behavioural disorders                              | Assumption: 1.0%                                                              |
| Dementia                                                                                                   |                                                                               |
| Assessment, diagnosis, advice, and follow-up for dementia                                                  | Assumption: 1.0%                                                              |
| Alcohol use/dependence                                                                                     |                                                                               |
| Identification and assessment of new cases of alcohol use/dependence                                       | Assumption: 1.0%                                                              |
| Brief interventions and follow-up for alcohol use/dependence                                               |                                                                               |
| Drug use/dependence                                                                                        |                                                                               |
| Identification and assessment of new cases of drug use/dependence                                          | Assumption: 1.0%                                                              |
| Brief interventions and follow-up for drug use/dependence                                                  |                                                                               |
| Self-harm/suicide                                                                                          |                                                                               |
| Assess and care for person with self-harm                                                                  | Assumption: 1.0%                                                              |
| <b>Maternal Newborn and Reproductive Health</b>                                                            |                                                                               |
| Family planning                                                                                            |                                                                               |

|                                                       |                                                                                   |
|-------------------------------------------------------|-----------------------------------------------------------------------------------|
| Pill - Standard daily regimen                         | KSA World Health Survey <sup>16</sup>                                             |
| IUD - Copper-T 380-A IUD (10 years)                   |                                                                                   |
| Withdrawal                                            |                                                                                   |
| Pregnancy care - ANC                                  |                                                                                   |
| Tetanus toxoid (pregnant women)                       | Estimate from KSA World Health Survey <sup>16</sup>                               |
| Basic ANC                                             |                                                                                   |
| Pregnancy care - Treatment of pregnancy complications |                                                                                   |
| Hypertensive disorder case management                 | Assumption: 100%                                                                  |
| Childbirth care - Facility births                     |                                                                                   |
| Pre-referral management of labour complications       | Assumption: 100%                                                                  |
| Postpartum care - Other                               |                                                                                   |
| Treatment of postpartum haemorrhage                   | Assumption: 100%                                                                  |
| Other sexual and reproductive health                  |                                                                                   |
| Treatment of urinary tract infection (UTI)            | Assumption derived from UHC Service Coverage Sub-Index on MNCH (WHO) <sup>2</sup> |
| Treatment of syphilis                                 |                                                                                   |
| Treatment of gonorrhoea                               |                                                                                   |
| Treatment of chlamydia                                |                                                                                   |
| Treatment of trichomoniasis                           |                                                                                   |
| Treatment of PID (Pelvic Inflammatory Disease)        |                                                                                   |
| General Practice                                      |                                                                                   |
| General Practice                                      | MOH Statistical Yearbook 2019 <sup>15</sup>                                       |
| Oral Care                                             |                                                                                   |
| Dental cleaning and preventive care                   | MOH Statistical Yearbook 2019 <sup>15</sup>                                       |

## References

1. Sultanate of Oman Ministry of Health. Annual Health Report 2019, 2020.
2. World Health Organization. The Global Health Observatory, 2023.
3. International Agency for Research on Cancer. Global Cancer Observatory. Cancer Today.
4. Ministry of Health of Bahrain. Health Statistics 2019, 2021.
5. United Nations DoEaSA, Population Division,. Contraceptive Use by Method 2019: Data Booklet (ST/ESA/SER.A/435), 2019.
6. Ministry of Health of Kuwait. Annual Health Report 2019. Fifty Sixth Edition (LVI), 20220.
7. Avenir Health. OneHealth Tool. Intervention Assumptions, January 2016.
8. Qatar Planning and Statistics Authority. Health Services Statistics - Chapter 6 2019 [Available from: <https://www.psa.gov.qa/en/statistics1/pages/topicslisting.aspx?parent=Social&child=Health> accessed 24/01/2022 2022.
9. The World Bank. World Bank Open Data, 2022.
10. Zainel A, Osman SRO, Al-Kohji SMS, et al. Iron deficiency, its epidemiological features and feeding practices among infants aged 12 months in Qatar: a cross-sectional study. *BMJ Open* 2018;8(5):e020271. doi: 10.1136/bmjopen-2017-020271 [published Online First: 20180509]
11. World Health Organization and United Nations Children's Fund. WHO/UNICEF estimates of national immunization coverage 2022 [Available from: <https://www.who.int/teams/immunization-vaccines-and-biologicals/immunization-analysis-and-insights/global-monitoring/immunization-coverage/who-unicef-estimates-of-national-immunization-coverage> accessed 06/03/2022.
12. ICO/IARC HPV Information Centre. United Arab Emirates. Human Papillomavirus and Related Cancers, Fact Sheet 2019. 2019
13. Government of Dubai. Open Data Dashboards. Departement of Health 2022 [Available from: <https://www.dha.gov.ae/en/open-data> accessed 04/03/2022.
14. Government of Abu Dhabi. Open Data Dashboards. Departement of Health 2022 [Available from: <https://www.doh.gov.ae/en/resources/opendata> accessed 04/03/2022.
15. Ministry of Health of the Kingdom of Saudi Arabia. Statistical Yearbook 2019. Chapter IV. Health Activities 2021 [Available from: <https://www.moh.gov.sa/en/Ministry/Statistics/book/Pages/default.aspx>.
16. Ministry of Health of the Kingdom of Saudi Arabia. World Health Survey Saudi Arabia 2019. Final Report., 2019.
17. Aljumah AA, Aljebreen AM. Policy of screening for colorectal cancer in Saudi Arabia: A prospective analysis. *Saudi J Gastroenterol* 2017;23(3):161-68. doi: 10.4103/sjg.SJG\_468\_16
18. Alreshidi MA, Haridi HK. Prevalence of anemia and associated risk factors among pregnant women in an urban community at the North of Saudi Arabia. *J Prev Med Hyg* 2021;62(3):E653-e63. doi: 10.15167/2421-4248/jpmh2021.62.3.1880 [published Online First: 20210915]
19. AlDuraibi S, Al-Mutawa J. Knowledge and awareness of folic acid usage in Saudi pregnant women in Riyadh city from 2019-2020. *J Family Med Prim Care* 2020;9(10):5158-64. doi: 10.4103/jfmpc.jfmpc\_638\_20 [published Online First: 20201030]
20. Azzeh F, Refaat B. Iodine adequacy in reproductive age and pregnant women living in the Western region of Saudi Arabia. *BMC Pregnancy Childbirth* 2020;20(1):370. doi: 10.1186/s12884-020-03057-w [published Online First: 20200622]

## CHEERS checklist—Items to include when reporting economic evaluations of health interventions

| Section/item                                              | Item No | Recommendation                                                                                                                                                                                                                                                                                                       | Reported on page No/line No |
|-----------------------------------------------------------|---------|----------------------------------------------------------------------------------------------------------------------------------------------------------------------------------------------------------------------------------------------------------------------------------------------------------------------|-----------------------------|
| <b>Title and abstract</b>                                 |         |                                                                                                                                                                                                                                                                                                                      |                             |
| Title                                                     | 1       | Identify the study as an economic evaluation or use more specific terms such as “cost-effectiveness analysis”, and describe the interventions compared.                                                                                                                                                              | P.1 / L.1-2                 |
| Abstract                                                  | 2       | Provide a structured summary of objectives, perspective, setting, methods (including study design and inputs), results (including base case and uncertainty analyses), and conclusions.                                                                                                                              | P.2 / L.1-28                |
| <b>Introduction</b>                                       |         |                                                                                                                                                                                                                                                                                                                      |                             |
| Background and objectives                                 | 3       | Provide an explicit statement of the broader context for the study.                                                                                                                                                                                                                                                  | P.3 / L.1-28                |
|                                                           |         | Present the study question and its relevance for health policy or practice decisions.                                                                                                                                                                                                                                | P.4-5 / L.30-2              |
| <b>Methods</b>                                            |         |                                                                                                                                                                                                                                                                                                                      |                             |
| Target population and subgroups                           | 4       | Describe characteristics of the base case population and subgroups analysed, including why they were chosen.                                                                                                                                                                                                         | NR                          |
| Settings and location                                     | 5       | State relevant aspects of the system(s) in which the decision(s) need(s) to be made.                                                                                                                                                                                                                                 | NR                          |
| Study perspective                                         | 6       | Describe the perspective of the study and relate this to the costs being evaluated.                                                                                                                                                                                                                                  | P.6 / L.3-14                |
| Comparators                                               | 7       | Describe the interventions or strategies being compared and state why they were chosen.                                                                                                                                                                                                                              | P.6 / L.6-8 & Table S1      |
| Time horizon                                              | 8       | State the time horizon(s) over which costs and consequences are being evaluated and say why appropriate.                                                                                                                                                                                                             | P.4 / L.36                  |
| Discount rate                                             | 9       | Report the choice of discount rate(s) used for costs and outcomes and say why appropriate.                                                                                                                                                                                                                           | NR                          |
| Choice of health outcomes                                 | 10      | Describe what outcomes were used as the measure(s) of benefit in the evaluation and their relevance for the type of analysis performed.                                                                                                                                                                              | NR                          |
| Measurement of effectiveness                              | 11a     | Single study-based estimates: Describe fully the design features of the single effectiveness study and why the single study was a sufficient source of clinical effectiveness data.                                                                                                                                  | NR                          |
|                                                           | 11b     | Synthesis-based estimates: Describe fully the methods used for identification of included studies and synthesis of clinical effectiveness data.                                                                                                                                                                      | NR                          |
| Measurement and valuation of 12 preference based outcomes | 12      | If applicable, describe the population and methods used to elicit preferences for outcomes.                                                                                                                                                                                                                          | NR                          |
| Estimating resources and costs                            | 13a     | Single study-based economic evaluation: Describe approaches used to estimate resource use associated with the alternative interventions. Describe primary or secondary research methods for valuing each resource item in terms of its unit cost. Describe any adjustments made to approximate to opportunity costs. | P.6-7 / L.34-31             |

|                                                                      |     |                                                                                                                                                                                                                                                                                                                                                       |                 |
|----------------------------------------------------------------------|-----|-------------------------------------------------------------------------------------------------------------------------------------------------------------------------------------------------------------------------------------------------------------------------------------------------------------------------------------------------------|-----------------|
|                                                                      | 13b | Model-based economic evaluation: Describe approaches and data sources used to estimate resource use associated with model health states. Describe primary or secondary research methods for valuing each resource item in terms of its unit cost. Describe any adjustments made to approximate to opportunity costs.                                  | NR              |
| Currency, price date, and conversion                                 | 14  | Report the dates of the estimated resource quantities and unit costs. Describe methods for adjusting estimated unit costs to the year of reported costs if necessary. Describe methods for converting costs into a common currency base and the exchange rate.                                                                                        | NR              |
| Choice of model                                                      | 15  | Describe and give reasons for the specific type of decision-analytical model used. Providing a figure to show model structure is strongly recommended.                                                                                                                                                                                                | NR              |
| Assumptions                                                          | 16  | Describe all structural or other assumptions underpinning the decision-analytical model.                                                                                                                                                                                                                                                              | Table S2-S8     |
| Analytical methods                                                   | 17  | Describe all analytical methods supporting the evaluation. This could include methods for dealing with skewed, missing, or censored data; extrapolation methods; methods for pooling data; approaches to validate or make adjustments (such as half cycle corrections) to a model; and methods for handling population heterogeneity and uncertainty. | NR              |
| <b>Results</b>                                                       |     |                                                                                                                                                                                                                                                                                                                                                       |                 |
| Study parameters                                                     | 18  | Report the values, ranges, references, and, if used, probability distributions for all parameters. Report reasons or sources for distributions used to represent uncertainty where appropriate. Providing a table to show the input values is strongly recommended.                                                                                   | Table S1-S8     |
| Incremental costs and outcomes                                       | 19  | For each intervention, report mean values for the main categories of estimated costs and outcomes of interest, as well as mean differences between the comparator groups. If applicable, report incremental cost-effectiveness ratios.                                                                                                                | NR              |
| Characterising uncertainty                                           | 20a | Single study-based economic evaluation: Describe the effects of sampling uncertainty for the estimated incremental cost and incremental effectiveness parameters, together with the impact of methodological assumptions (such as discount rate, study perspective).                                                                                  | NR              |
|                                                                      | 20b | Model-based economic evaluation: Describe the effects on the results of uncertainty for all input parameters, and uncertainty related to the structure of the model and assumptions.                                                                                                                                                                  | NR              |
| Characterising heterogeneity                                         | 21  | If applicable, report differences in costs, outcomes, or cost-effectiveness that can be explained by variations between subgroups of patients with different baseline characteristics or other observed variability in effects that are not reducible by more information.                                                                            | NR              |
| <b>Discussion</b>                                                    |     |                                                                                                                                                                                                                                                                                                                                                       |                 |
| Study findings, limitations, generalisability, and current knowledge | 22  | Summarise key study findings and describe how they support the conclusions reached. Discuss limitations and the generalisability of the findings and how the findings fit with current knowledge.                                                                                                                                                     | P.13-17 / L.1-3 |

---

**Other**

---

|                      |    |                                                                                                                                                                                                                                                   |                |
|----------------------|----|---------------------------------------------------------------------------------------------------------------------------------------------------------------------------------------------------------------------------------------------------|----------------|
| Source of funding    | 23 | Describe how the study was funded and the role of the funder in the identification, design, conduct, and reporting of the analysis. Describe other non-monetary sources of support.                                                               | P.20 / L.14-16 |
| Conflict of interest | 24 | Describe any potential for conflict of interest of study contributors in accordance with journal policy. In the absence of a journal policy, we recommend authors comply with International Committee of Medical Journal Editors recommendations. | P.20 / L.10-12 |

---

For peer review only
