# Supplementary material for: Economics of primary healthcare: cost estimation of clinical services at primary care facilities in the six countries of the Gulf Cooperation Council
Source: PubMed Central journal article supplement — BMJ Open. 2024 Jun 8;14(6):e079332. doi: 10.1136/bmjopen-2023-079332 (PMC11163647; doi:10.1136/bmjopen-2023-079332), 2024-06-08
Supplement: bmjopen-2023-079332supp001.pdf [file bmjopen-2023-079332supp001.pdf]

## Economics of Primary Healthcare: Cost Estimation of Clinical Services at Primary Care Facilities in The Six Countries of The Gulf Cooperation Council.

Khalifa Elmusharaf, Sébastien Poix, Daniel Grafton, Johanna Jung, Rebecca Gribble, Rachael Stanton, Nicholas Banatvala, Lamia Mahmoud, Deena Alasfoor, Tayba Alawadi, Mohammed Mustafa, Lulwa Shuwaiter, Mohamed Alsuwaidan, Zahir Al-Abri, Sultana Al-Sabahi, Sherif Fiddah, Hassan Raza Syed, Muneera Almutairi, Yahya Al-Farsi, Dudley Tarlton

### Supplementary Materials

**Table S1. List of selected services by country**

| Service                                            | Bahrain | KSA | Kuwait | Oman | Qatar | UAE |
|----------------------------------------------------|---------|-----|--------|------|-------|-----|
| <b>Immunization</b>                                |         |     |        |      |       |     |
| Anti-rabies                                        |         |     | X      |      |       |     |
| BCG vaccine                                        | X       | X   | X      | X    | X     | X   |
| DPT vaccine                                        | X       |     | X      | X    | X     | X   |
| DT Adult                                           |         |     | X      |      |       |     |
| DT paediatrics                                     |         |     | X      |      |       |     |
| Heb B vaccine (paediatrics)                        |         |     | X      |      |       |     |
| Hep B vaccine                                      | X       |     |        |      | X     | X   |
| Hib vaccine                                        | X       |     |        |      | X     | X   |
| HPV vaccine                                        |         | X   |        |      |       | X   |
| Influenza vaccine                                  | X       |     | X      |      | X     | X   |
| Measles vaccine                                    | X       | X   | X      | X    | X     | X   |
| Meningococcal vaccine                              |         |     | X      |      |       |     |
| Pentavalent vaccine                                |         | X   | X      | X    |       |     |
| Pneumococcal vaccine                               | X       | X   | X      | X    | X     | X   |
| Polio vaccine                                      | X       | X   | X      | X    | X     | X   |
| Rotavirus vaccine                                  | X       |     | X      |      | X     | X   |
| Rubella vaccine                                    |         | X   |        |      |       |     |
| TT                                                 |         |     | X      |      |       |     |
| Varicella vaccine                                  | X       | X   | X      | X    | X     |     |
| <b>Non-Communicable Diseases</b>                   |         |     |        |      |       |     |
| <b>Breast Cancer</b>                               |         |     |        |      |       |     |
| Basic breast cancer awareness                      | X       | X   | X      | X    | X     | X   |
| Diagnosis after screened with clinical breast exam |         |     | X      | X    |       | X   |
| Diagnosis after screened with mammography          |         |     |        |      |       | X   |
| Diagnosis without screening for breast cancer      |         |     |        |      |       | X   |
| Diagnosis: screened with clinical breast exam      |         | X   |        |      |       |     |

|                                                                                              |                |            |               |             |              |            |
|----------------------------------------------------------------------------------------------|----------------|------------|---------------|-------------|--------------|------------|
| Diagnosis: screened with mammogram                                                           |                | X          |               |             |              |            |
| Post-treatment surveillance for breast cancer patients                                       |                | X          |               |             |              |            |
| Screening: clinical breast examination                                                       | X              | X          | X             | X           | X            | X          |
| <b>Service</b>                                                                               | <b>Bahrain</b> | <b>KSA</b> | <b>Kuwait</b> | <b>Oman</b> | <b>Qatar</b> | <b>UAE</b> |
| Screening: mammography                                                                       |                | X          |               |             |              | X          |
| <b>Cervical Cancer</b>                                                                       |                |            |               |             |              |            |
| HPV DNA + VIA                                                                                |                |            |               |             |              | X          |
| Papanicolaou test (pap smear)                                                                | X              | X          | X             | X           | X            | X          |
| Post-treatment surveillance for cervical cancer                                              |                | X          |               |             |              |            |
| Visual inspection with acetic acid (VIA)                                                     |                |            |               |             |              | X          |
| <b>Colorectal Cancer</b>                                                                     |                |            |               |             |              |            |
| Diagnosis for colorectal cancer screened with FIT                                            |                |            |               |             |              | X          |
| Diagnosis for colorectal cancer screened with FOBT                                           |                | X          |               |             |              | X          |
| Diagnosis without screening for colorectal cancer (symptom based)                            |                | X          |               |             |              | X          |
| Post-treatment surveillance for colorectal cancer                                            |                | X          |               |             |              |            |
| Screening: colonoscopy                                                                       |                | X          |               |             |              |            |
| Screening: faecal immunochemical test                                                        |                |            |               |             |              | X          |
| Screening: faecal occult blood testing                                                       | X              | X          | X             | X           | X            | X          |
| Screening: sigmoidoscopy                                                                     |                | X          |               |             |              |            |
| <b>CVD &amp; Diabetes</b>                                                                    |                |            |               |             |              |            |
| Follow-up care for those at low risk of CVD/Diabetes (absolute Risk: 10-20%)                 | X              | X          | X             | X           | X            | X          |
| Intensive glycaemic control                                                                  | X              | X          | X             | X           | X            | X          |
| Neuropathy screening and preventive foot care                                                | X              | X          | X             | X           | X            | X          |
| Referral for retinopathy screening                                                           |                |            |               | X           |              |            |
| Retinopathy screening                                                                        | X              |            | X             |             | X            | X          |
| Screening for risk of CVD/Diabetes                                                           | X              | X          | X             | X           | X            | X          |
| Standard glycaemic control                                                                   | X              | X          | X             | X           | X            | X          |
| Treatment for those with absolute risk of CVD/Diabetes 20-30%                                | X              | X          | X             | X           | X            | X          |
| Treatment for those with established cerebrovascular disease and post stroke                 | X              | X          | X             | X           | X            | X          |
| Treatment for those with high absolute risk of CVD/Diabetes (>30%)                           | X              | X          | X             | X           | X            | X          |
| Treatment for those with high blood pressure but low absolute risk of CVD/Diabetes (< 20%)   | X              | X          | X             | X           | X            | X          |
| Treatment for those with very high cholesterol but low absolute risk of CVD/Diabetes (< 20%) | X              | X          | X             | X           | X            | X          |
| Treatment of cases with established ischaemic heart disease (IHD)                            | X              | X          | X             | X           | X            | X          |
| Treatment of cases with rheumatic heart disease (with benzathine penicillin)                 | X              | X          |               |             | X            | X          |
| Treatment of new cases of acute myocardial infarction (AMI) with aspirin                     | X              | X          | X             | X           | X            | X          |
| <b>Emergency care</b>                                                                        |                |            |               |             |              |            |
| Average annual emergency care needs                                                          | X              | X          | X             | X           | X            | X          |
| <b>Oral Care</b>                                                                             |                |            |               |             |              |            |

|                                                                                 |                |            |               |             |              |            |
|---------------------------------------------------------------------------------|----------------|------------|---------------|-------------|--------------|------------|
| Dental cleaning and preventive care                                             | X              | X          | X             | X           | X            |            |
| Oral and dental care                                                            |                |            |               |             |              | X          |
| <b>Respiratory Diseases</b>                                                     |                |            |               |             |              |            |
| <b>Service</b>                                                                  | <b>Bahrain</b> | <b>KSA</b> | <b>Kuwait</b> | <b>Oman</b> | <b>Qatar</b> | <b>UAE</b> |
| Asthma: high dose inhaled beclomethasone + SABA                                 | X              |            | X             |             | X            | X          |
| Asthma: high dose inhaled fluticasone + SABA                                    |                | X          |               | X           |              |            |
| Asthma: inhaled short acting beta agonist for intermittent asthma               | X              | X          | X             | X           | X            | X          |
| Asthma: low dose inhaled beclomethasone + SABA                                  | X              |            | X             |             | X            | X          |
| Asthma: low dose inhaled fluticasone + SABA                                     |                | X          |               | X           |              |            |
| Asthma: oral prednisolone + theophylline + high dose inhaled fluticasone + SABA |                | X          |               | X           |              |            |
| Asthma: theophylline + high dose inhaled fluticasone + SABA                     |                | X          |               | X           |              |            |
| COPD: exacerbation treatment with antibiotics                                   | X              | X          | X             | X           | X            | X          |
| COPD: exacerbation treatment with oral prednisolone                             | X              | X          | X             | X           | X            | X          |
| COPD: exacerbation treatment with oxygen                                        |                | X          |               | X           |              | X          |
| COPD: inhaled salbutamol                                                        | X              | X          | X             | X           | X            | X          |
| COPD: ipratropium inhaler                                                       | X              | X          | X             | X           | X            | X          |
| COPD: low-dose oral theophylline                                                | X              | X          | X             | X           | X            |            |
| COPD: smoking cessation                                                         | X              | X          | X             | X           | X            | X          |
| <b>Child Health</b>                                                             |                |            |               |             |              |            |
| <b>Deworming</b>                                                                |                |            |               |             |              |            |
| Deworming                                                                       | X              |            | X             | X           | X            |            |
| <b>Diarrhea management</b>                                                      |                |            |               |             |              |            |
| Antibiotics for treatment of dysentery                                          |                | X          |               | X           |              | X          |
| ORS                                                                             | X              | X          | X             | X           | X            | X          |
| Treatment of severe diarrhea                                                    |                | X          |               |             |              |            |
| Zinc (diarrhea treatment)                                                       |                | X          |               | X           |              |            |
| <b>General</b>                                                                  |                |            |               |             |              |            |
| Zinc supplementation                                                            |                | X          |               | X           |              |            |
| Child general health                                                            | X              | X          | X             | X           | X            | X          |
| School health                                                                   | X              |            |               |             | X            |            |
| <b>Malaria</b>                                                                  |                |            |               |             |              |            |
| Malaria treatment (0-4, mild cases)                                             |                |            |               | X           |              |            |
| <b>Pneumonia</b>                                                                |                |            |               |             |              |            |
| Pneumonia treatment (children)                                                  | X              | X          | X             | X           | X            | X          |
| Treatment of severe pneumonia                                                   |                | X          |               |             |              |            |
| <b>Routine Child Health Care Visit</b>                                          |                |            |               |             |              |            |
| Routine child health care visit (< 1 year)                                      |                |            |               |             |              | X          |
| Routine child health care visit (1-5 years)                                     |                |            |               |             |              | X          |
| <b>School Health Program</b>                                                    |                |            |               |             |              |            |

|                                                                                               |                |            |               |             |              |            |
|-----------------------------------------------------------------------------------------------|----------------|------------|---------------|-------------|--------------|------------|
| Dental screening                                                                              |                |            |               | X           |              |            |
| Ear screening                                                                                 |                |            |               | X           |              |            |
| Eye screening                                                                                 |                |            |               | X           |              |            |
| <b>Service</b>                                                                                | <b>Bahrain</b> | <b>KSA</b> | <b>Kuwait</b> | <b>Oman</b> | <b>Qatar</b> | <b>UAE</b> |
| <b>Nutrition</b>                                                                              |                |            |               |             |              |            |
| <b>Adults</b>                                                                                 |                |            |               |             |              |            |
| Care for adults with food allergies and sensitivities                                         |                |            |               |             |              | X          |
| Care for adults with hyperuricemia                                                            |                |            |               |             |              | X          |
| Care for adults with kidney diseases                                                          |                |            |               |             |              | X          |
| Care for adults with low BMI                                                                  | X              | X          | X             | X           | X            |            |
| Care for adults with nutritional anaemia                                                      |                |            |               |             |              | X          |
| <b>Care for adults with other nutritional diseases</b>                                        |                |            |               |             |              |            |
| Care for diabetic adults                                                                      |                |            |               |             |              | X          |
| Care for obese adults                                                                         |                |            |               |             |              | X          |
| <b>All populations</b>                                                                        |                |            |               |             |              |            |
| Food fortification                                                                            |                |            |               |             |              | X          |
| <b>Children</b>                                                                               |                |            |               |             |              |            |
| Breastfeeding counselling and support                                                         | X              | X          | X             | X           | X            |            |
| Complementary feeding counselling and support                                                 | X              | X          | X             | X           |              |            |
| <b>Feeding counselling and support for infants and young children in emergency situations</b> |                |            |               |             |              |            |
| Intermittent iron supplementation in children                                                 | X              |            | X             | X           | X            |            |
| Management of food allergies or food intolerances                                             |                |            |               |             |              | X          |
| Management of moderate acute malnutrition                                                     |                |            |               |             |              | X          |
| Management of moderate acute malnutrition (children)                                          |                | X          |               | X           |              |            |
| Management of severe malnutrition                                                             |                |            |               |             |              | X          |
| <b>Pregnant and lactating women</b>                                                           |                |            |               |             |              |            |
| Calcium supplementation for prevention and treatment of pre-eclampsia and eclampsia           |                |            |               | X           |              |            |
| Daily FAF, postpartum, anaemic women                                                          |                |            |               | X           |              |            |
| Daily iron and folic acid supplementation (pregnant women)                                    | X              | X          | X             | X           | X            |            |
| Intermittent FAF, postpartum, non-anaemic pregnant women                                      |                |            |               | X           |              |            |
| Intermittent iron and folic acid supplementation (non-anaemic pregnant women)                 | X              | X          | X             | X           | X            |            |
| Iodine supplementation in pregnant women                                                      |                | X          |               |             |              |            |
| Vitamin A supplementation in pregnant women                                                   |                | X          |               |             |              |            |
| <b>Women of reproductive age and adolescent girls</b>                                         |                |            |               |             |              |            |
| Intermittent iron-folic acid supplementation                                                  | X              | X          | X             | X           | X            |            |
| <b>Mental Health</b>                                                                          |                |            |               |             |              |            |
| <b>Alcohol use/ dependence</b>                                                                |                |            |               |             |              |            |
| Identification and assessment of new cases of alcohol use/dependence                          |                |            |               | X           |              | X          |

|                                                                                                                           |                |            |               |             |              |            |
|---------------------------------------------------------------------------------------------------------------------------|----------------|------------|---------------|-------------|--------------|------------|
| Brief interventions and follow-up for alcohol use/dependence                                                              |                | X          |               | X           |              |            |
| Identification and assessment of new cases of alcohol use/dependence                                                      |                | X          |               |             |              |            |
| <b>Anxiety Disorders</b>                                                                                                  |                |            |               |             |              |            |
| <b>Service</b>                                                                                                            | <b>Bahrain</b> | <b>KSA</b> | <b>Kuwait</b> | <b>Oman</b> | <b>Qatar</b> | <b>UAE</b> |
| Basic psychological treatment for anxiety disorders (mild cases).                                                         | X              |            | X             | X           | X            | X          |
| Basic psychosocial treatment and anti-depressant medication for anxiety disorders (mild-moderate cases)                   | X              | X          | X             |             | X            | X          |
| Basic psychosocial treatment for anxiety disorders (mild cases)                                                           |                | X          |               |             |              |            |
| <b>Attention Disorders</b>                                                                                                |                |            |               |             |              |            |
| Methylphenidate medication                                                                                                |                |            |               |             |              | X          |
| <b>Bipolar Disorders</b>                                                                                                  |                |            |               |             |              |            |
| Basic psychosocial treatment, advice, and follow-up for bipolar disorder, plus mood-stabilizing medication                |                | X          |               |             |              | X          |
| <b>Conduct Disorders</b>                                                                                                  |                |            |               |             |              |            |
| Basic psychosocial treatment, advice, and follow-up for behavioural disorders                                             |                | X          |               |             |              | X          |
| <b>Dementia</b>                                                                                                           |                |            |               |             |              |            |
| Assessment, diagnosis, advice, and follow-up for dementia                                                                 |                | X          |               |             |              | X          |
| Dementia screening, basic work up and referral to tertiary care                                                           |                |            |               | X           |              |            |
| Pharmacological treatment of dementia                                                                                     |                |            |               |             |              | X          |
| <b>Depression</b>                                                                                                         |                |            |               |             |              |            |
| Basic psychosocial treatment and anti-depressant medication of first episode (mild to moderate cases)                     |                |            |               | X           |              |            |
| Basic psychosocial treatment and anti-depressant medication of first episode (moderate-severe cases)                      | X              | X          | X             |             | X            | X          |
| Basic psychosocial treatment for mild depression                                                                          | X              | X          | X             | X           | X            | X          |
| Intensive psychosocial treatment and anti-depressant medication of recurrent moderate-severe cases on a maintenance basis |                |            |               |             |              | X          |
| Psychosocial care for perinatal depression                                                                                |                |            |               |             |              | X          |
| Psychosocial care for perinatal depression for mild cases only                                                            |                |            |               | X           |              |            |
| <b>Developmental Disorders</b>                                                                                            |                |            |               |             |              |            |
| Basic psychosocial treatment, advice, and follow-up for developmental disorders                                           |                | X          |               |             |              | X          |
| <b>Drug use/dependence</b>                                                                                                |                |            |               |             |              |            |
| Brief interventions and follow-up for drug use/dependence                                                                 |                | X          |               | X           |              | X          |
| Identification and assessment of new cases of drug use/dependence                                                         |                | X          |               | X           |              |            |
| <b>Epilepsy</b>                                                                                                           |                |            |               |             |              |            |
| Basic psychosocial support, advice, and follow-up only                                                                    |                |            |               | X           |              |            |
| Basic psychosocial support, advice, and follow-up, plus anti-epileptic medication                                         |                | X          |               |             |              | X          |
| <b>Psychosis</b>                                                                                                          |                |            |               |             |              |            |
| Basic psychosocial support and anti-psychotic medication                                                                  |                | X          |               | X           |              | X          |
| <b>Self-harm/suicide</b>                                                                                                  |                |            |               |             |              |            |
| Assess and care for person with self-harm                                                                                 |                | X          |               | X           |              |            |

|                                                                           |                |            |               |             |              |            |
|---------------------------------------------------------------------------|----------------|------------|---------------|-------------|--------------|------------|
| Basic psychosocial treatment, advice, and follow-up for self-harm/suicide |                |            |               | X           |              |            |
| Pesticide intoxication management                                         |                |            |               | X           |              |            |
| <b>Maternal Newborn and Reproductive Health</b>                           |                |            |               |             |              |            |
| <b>Antenatal Care (ANC)</b>                                               |                |            |               |             |              |            |
| <b>Service</b>                                                            | <b>Bahrain</b> | <b>KSA</b> | <b>Kuwait</b> | <b>Oman</b> | <b>Qatar</b> | <b>UAE</b> |
| Antenatal Care (ANC)                                                      |                |            |               |             |              | X          |
| <b>Childbirth care - Facility births</b>                                  |                |            |               |             |              |            |
| Feeding counselling and support for low-birth-weight infants              |                |            |               | X           |              |            |
| Kangaroo mother care                                                      |                |            |               | X           |              |            |
| Labour and delivery management                                            |                |            |               | X           |              |            |
| Manual removal of placenta                                                |                |            |               | X           |              |            |
| MgSO4 for eclampsia                                                       |                |            |               | X           |              |            |
| Neonatal resuscitation                                                    |                |            |               | X           |              |            |
| Parenteral administration of uterotonics                                  |                |            |               | X           |              |            |
| Pre-referral management of labour complications                           |                | X          |               | X           |              |            |
| Treatment of local infections (newborn)                                   |                |            |               | X           |              |            |
| <b>Family planning</b>                                                    |                |            |               |             |              |            |
| Condom - male                                                             |                |            |               | X           |              |            |
| Contraception management                                                  |                |            |               |             | X            |            |
| Implant - Implanon (3 years)                                              |                |            |               | X           |              |            |
| Injectable - 3 month (depo provera)                                       | X              |            | X             | X           |              |            |
| IUCD follow-up care                                                       | X              |            | X             |             | X            |            |
| IUD - Copper-T 380-A IUD (10 years)                                       |                | X          |               | X           |              |            |
| Lactational amenorrhea method                                             |                |            |               | X           |              |            |
| Other contraceptives                                                      | X              |            | X             |             |              |            |
| Periodic abstinence                                                       |                |            |               | X           |              |            |
| Pill - progestin only                                                     | X              |            | X             | X           |              |            |
| Pill - standard daily regimen                                             |                | X          |               |             |              |            |
| Standard days method                                                      |                |            |               | X           |              |            |
| Withdrawal                                                                |                | X          |               | X           |              |            |
| Post-abortion case management                                             |                |            | X             |             | X            |            |
| <b>Management of ectopic pregnancy care</b>                               |                |            |               |             |              |            |
| Ectopic case management                                                   |                |            |               | X           |              |            |
| <b>Menopause Program</b>                                                  |                |            |               |             |              |            |
| Screen for mood disorders                                                 |                |            |               | X           |              |            |
| Screen for urogenital dryness                                             |                |            |               | X           |              |            |
| <b>Other</b>                                                              |                |            |               |             |              |            |
| Postmenopausal care                                                       |                |            | X             |             |              |            |
| Management of abnormal uterine bleeding                                   |                |            | X             |             |              |            |

|                                                                   |                |            |               |             |              |            |
|-------------------------------------------------------------------|----------------|------------|---------------|-------------|--------------|------------|
| Management of amenorrhoea                                         |                |            | X             |             |              |            |
| Management of hirsutism                                           |                |            | X             |             |              |            |
| Management of irregular cycles                                    |                |            | X             |             |              |            |
| Management of mild endometriosis                                  |                |            | X             |             |              |            |
| <b>Service</b>                                                    | <b>Bahrain</b> | <b>KSA</b> | <b>Kuwait</b> | <b>Oman</b> | <b>Qatar</b> | <b>UAE</b> |
| Management of PCO                                                 |                |            | X             |             |              |            |
| Management of pre pubertal problems (delayed menarche, infection) |                |            | X             |             |              |            |
| <b>Other sexual and reproductive health</b>                       |                |            |               |             |              |            |
| Cervical cancer screening                                         |                | X          | X             |             |              |            |
| Identification and management of infertility                      | X              | X          | X             | X           | X            |            |
| Treatment of chlamydia                                            | X              | X          | X             | X           | X            |            |
| Treatment of gonorrhoea                                           | X              | X          | X             | X           | X            |            |
| Treatment of pelvic inflammatory disease                          | X              | X          | X             | X           | X            |            |
| Treatment of syphilis                                             | X              | X          | X             | X           | X            |            |
| Treatment of trichomoniasis                                       | X              | X          | X             | X           | X            |            |
| Treatment of urinary tract infection                              | X              | X          | X             | X           | X            |            |
| <b>Postpartum Care</b>                                            |                |            |               |             |              |            |
| Breast feeding education and advice                               | X              |            | X             |             | X            |            |
| Mastitis                                                          | X              |            | X             | X           |              |            |
| Postnatal care                                                    |                |            |               |             |              | X          |
| Postpartum care examination                                       |                |            |               |             | X            |            |
| Treatment of postpartum haemorrhage                               | X              | X          | X             | X           | X            |            |
| Maternal sepsis case management                                   |                |            |               | X           |              |            |
| <b>Preconception Care (PCC)</b>                                   |                |            |               |             |              |            |
| Preconception care                                                |                |            |               |             |              | X          |
| <b>Pregnancy Care</b>                                             |                |            |               |             |              |            |
| Basic ANC                                                         | X              | X          | X             | X           | X            |            |
| Syphilis detection and treatment (pregnant women)                 | X              |            | X             |             | X            |            |
| Tetanus toxoid (pregnant women)                                   | X              | X          | X             | X           | X            |            |
| Syphilis screening (pregnant women)                               |                |            |               | X           |              |            |
| <b>Pregnancy care - Treatment of pregnancy complications</b>      |                |            |               |             |              |            |
| Deworming (pregnant women)                                        | X              |            | X             | X           |              |            |
| Hypertensive disorder case management                             |                | X          |               | X           |              |            |
| Management of other pregnancy complications                       |                |            |               | X           |              |            |
| Management of pre-eclampsia (magnesium sulphate)                  |                |            |               | X           |              |            |
| <b>Premarital screening program</b>                               |                |            |               |             |              |            |
| Premarital screening program                                      |                |            |               |             |              | X          |
| <b>General Practice</b>                                           |                |            |               |             |              |            |
| General practice                                                  | X              | X          | X             | X           | X            | X          |

**Table S2. Assumptions used to estimate the population in need, drugs and supplies costs, and labour costs (all countries)**

| Service                                                                   | Population in Need                                                                                     | Drugs and Supply Costs                                   | Labour Costs                                      |
|---------------------------------------------------------------------------|--------------------------------------------------------------------------------------------------------|----------------------------------------------------------|---------------------------------------------------|
| Varicella vaccine                                                         | Children 1 and 5 years old, for the first and the second dose                                          | USD 17.5 for one dose (WHO Review of vaccine price data) | Nurse (4 min) and GP (4 min) for one dose         |
| Influenza vaccine                                                         | Children 0-5 + Pregnant women + People 65+                                                             | USD 2.39 for one dose (WHO Review of vaccine price data) | Nurse (4 min) and GP (4 min) for one dose         |
| Retinopathy screening                                                     | People with diabetes should be screened every year (100%)                                              | -                                                        | -                                                 |
| Neuropathy screening                                                      | People with diabetes should be screened every year (100%)                                              | -                                                        | -                                                 |
| Clinical breast examination                                               | Women aged 40-70 should be screened every 2 years (50%)                                                | -                                                        | -                                                 |
| Diagnosis after screened with clinical breast examination                 | Based on country breast cancer incidence rate (WHO – IARC 2020)                                        | -                                                        | -                                                 |
| Pap smear                                                                 | Women 30-49 should be screened every 3 years (33%)                                                     | -                                                        | -                                                 |
| Faecal occult blood screening                                             | People 50+ should be screened every 10 years (10%)                                                     | -                                                        | -                                                 |
| Dental cleaning and preventive care                                       | All population                                                                                         | No costs estimated                                       | Nurse (20 min) and Dentist (15 min) for one visit |
| General child health                                                      | Children 0-14                                                                                          | Cost per outpatient visit (WHO-CHOICE) – Labour costs    | GP (15 min) for one visit                         |
| Pneumonia treatment                                                       | -                                                                                                      | -                                                        | Nurse (20 min) + GP (20 min) for one visit        |
| Daily iron and folic acid supplementation (anaemic pregnant women)        | 100% of anaemic pregnant women (World Bank)                                                            | -                                                        | -                                                 |
| Intermittent iron folic acid supplementation (non-anaemic pregnant women) | 100% of non-anaemic pregnant women (World Bank)                                                        | -                                                        | -                                                 |
| Daily FAF, postpartum, non-anaemic women                                  | Based on number of live births (Annual Health Statistics) and percentage of anaemic women (World Bank) |                                                          |                                                   |



|                                              |                                                                                                                                                          |                                                       |                                                       |
|----------------------------------------------|----------------------------------------------------------------------------------------------------------------------------------------------------------|-------------------------------------------------------|-------------------------------------------------------|
| Intermittent FAF, postpartum, anaemic women  | Based on number of live births (Annual Health Statistics) and percentage of non-anaemic women (World Bank)                                               |                                                       |                                                       |
| Care for adults with low BMI                 | 100% of underweight adults (Global Nutrition Report)                                                                                                     | -                                                     | -                                                     |
| All mental health clinical services          | Based on prevalence rates (Zuberi et al. 2021, GBD 2016 Epilepsy Collaborators, GBD 2016 Dementia Collaborators, WHO-EMRO, Atlas of Substance Disorder). | -                                                     | -                                                     |
| Treatment of postpartum haemorrhage (PPH)    | Based on incidence rates of PPH                                                                                                                          | -                                                     | -                                                     |
| Identification and management of infertility | Based on regional prevalence (Eldib 2018) among adults 15-49 (3.8%)                                                                                      | -                                                     | -                                                     |
| Treatment of syphilis                        | Based on regional incidence rates (Kenyon et al. 2014) among adults 15-49 (2.2%)                                                                         | -                                                     | -                                                     |
| Treatment of gonorrhoea                      | Based on regional incidence rates (Kenyon et al. 2014) among adults 15-49 (0.9%)                                                                         | -                                                     | -                                                     |
| Treatment of chlamydia                       | Based on regional incidence rates (Kenyon et al. 2014) among adults 15-49 (1.9%)                                                                         | -                                                     | -                                                     |
| Treatment of trichomoniasis                  | Based on regional incidence rates (Kenyon et al. 2014) among adults 15-49 (2.8%)                                                                         | -                                                     | -                                                     |
| Treatment of pelvic inflammatory infection   | Based on US incidence rate (Kresiel 2021) among adults 15-49 (3.6%)                                                                                      | -                                                     | -                                                     |
| General practice                             | All population                                                                                                                                           | Cost per outpatient visit (WHO-CHOICE) – Labour costs | GP (15 min) for one visit                             |
| All Services                                 | -                                                                                                                                                        | -                                                     | Community health workers time was allocated to nurses |

**Table S2-A. Country-specific assumptions (Oman)**

| Service                                  | Population in Need               | Drugs and Supply Costs | Labour Costs                 |
|------------------------------------------|----------------------------------|------------------------|------------------------------|
| School health program (eye screening)    | Children in grade 1, 4, 7 and 10 | No costs estimated     | Nurse (10 min) for one visit |
| School health program (dental screening) | Children in grade 1              | No costs estimated     | Nurse (10 min) for one visit |

|                                                                             |                           |                    |                              |
|-----------------------------------------------------------------------------|---------------------------|--------------------|------------------------------|
| School health program ( ear screening)                                      | Children in grade 1 and 2 | No costs estimated | Nurse (10 min) for one visit |
| Menopause program: screen for urogenital dryness, screen for mood disorders | Women 45-55 (100%)        | No costs estimated | GP (15 min) for one visit    |
| Elderly and community care program                                          | People 60+                | No costs estimated | Nurse (45 min) for one visit |

**Table S2-B. Country-specific assumptions (Bahrain)**

| Service       | Population in Need | Drugs and Supply Costs | Labour Costs                 |
|---------------|--------------------|------------------------|------------------------------|
| School health | Children 5-19      | No costs estimated     | Nurse (10 min) for one visit |

**Table S2-C. Country-specific assumptions (Kuwait)**

| Service                                                                                                                                      | Population in Need                                                            | Drugs and Supply Costs                      | Labour Costs                              |
|----------------------------------------------------------------------------------------------------------------------------------------------|-------------------------------------------------------------------------------|---------------------------------------------|-------------------------------------------|
| Meningococcal vaccine                                                                                                                        | PIN was not estimated since the number of visits was directly provided by MOH | USD 10.6 (WHO Review of vaccine price data) | Nurse (4 min) and GP (4 min) for one dose |
| DT adult vaccine                                                                                                                             | PIN was not estimated since the number of visits was directly provided by MOH | USD 1.8 (WHO Review of vaccine price data)  | Nurse (4 min) and GP (4 min) for one dose |
| DT pediatrics vaccine                                                                                                                        | PIN was not estimated since the number of visits was directly provided by MOH | USD 1.8 (WHO Review of vaccine price data)  | Nurse (4 min) and GP (4 min) for one dose |
| Anti-rabies vaccine                                                                                                                          | PIN was not estimated since the number of visits was directly provided by MOH | USD 48.6 (WHO Review of vaccine price data) | Nurse (4 min) and GP (4 min) for one dose |
| Hep B vaccine (paediatrics)                                                                                                                  | PIN was not estimated since the number of visits was directly provided by MOH | USD 3.24 (WHO Review of vaccine price data) | Nurse (4 min) and GP (4 min) for one dose |
| TT vaccine                                                                                                                                   | PIN was not estimated since the number of visits was directly provided by MOH | USD 0.58 (WHO Review of vaccine price data) | Nurse (4 min) and GP (4 min) for one dose |
| Management of pre-pubertal problems                                                                                                          | PIN was not estimated since the number of visits was directly provided by MOH | No costs estimated                          | Obs/Gyn (15 min) for one visit            |
| Management of PCO, hirsutism, irregular cycles, amenorrhea, abnormal uterine bleeding, management of mild endometriosis, postmenopausal care | PIN was not estimated since the number of visits was directly provided by MOH | No costs estimated                          | Obs/Gyn (15 min) for one visit            |

**Table S2-D. Country-specific assumptions (Qatar)**

| Service                     | Population in Need                                                            | Drugs and Supply Costs                                | Labour Costs                                   |
|-----------------------------|-------------------------------------------------------------------------------|-------------------------------------------------------|------------------------------------------------|
| Child General Health        | Children 0-14                                                                 | Cost per outpatient visit (WHO-CHOICE) – Labour costs | GP (15 min) for one visit                      |
| School health               | PIN was not estimated since the number of visits was directly provided by MOH | No costs estimated                                    | Nurse (10 min) for one visit                   |
| Postpartum care examination | PIN was not estimated since the number of visits was directly provided by MOH | Cost per outpatient visit (WHO-CHOICE) – Labour costs | GP (10 min) and Midwife (20 min) for one visit |
| Allied health               | PIN was not estimated since the number of visits was directly provided by MOH | Cost per outpatient visit (WHO-CHOICE) – Labour costs | Nurse (20 min) for one visit                   |

**Table S2-E. Country-specific assumptions (UAE)**

| Service                                                   | Population in Need                                                  | Drugs and Supply Costs                                    | Labour Costs                |
|-----------------------------------------------------------|---------------------------------------------------------------------|-----------------------------------------------------------|-----------------------------|
| <b>Screening: mammography</b>                             | Women aged 40-70 should be screened every 2 years (50%)             | -                                                         | -                           |
| <b>Diagnosis for breast cancer</b>                        | Based on country breast cancer incidence rate (WHO – IARC 2020)     | -                                                         | -                           |
| <b>Visual inspection with acetic acid, HPV DNA + VIA.</b> | Based on country cervix cancer incidence rate (WHO – IARC 2020)     | -                                                         | -                           |
| <b>Screening; faecal immunochemical test</b>              | Based on country colorectal cancer incidence rate (WHO – IARC 2020) | -                                                         | -                           |
| <b>Diagnosis for colorectal cancer</b>                    | Based on country colorectal cancer incidence rate (WHO – IARC 2020) | -                                                         | -                           |
| <b>Routine child healthcare visit (1 year)</b>            | Children 0-12 months (100%)                                         | Estimate based on OHT drugs and supplies prices: USD 19.7 | Nurse (20 min), GP (10 min) |
| <b>Routine child healthcare visit (1-5 years)</b>         | Children 12-59 months (100%)                                        | Estimate based on OHT drugs and supplies prices: USD 2.8  | Nurse (20 min), GP (10 min) |
| <b>Nutrition: Care for obese adults</b>                   | People with obesity (Global Nutrition Report)                       | No costs estimated                                        | GP (10 min)                 |
| <b>Nutrition: Care for diabetic adults</b>                | People with diabetes (OHT)                                          | No costs estimated                                        | GP (10 min)                 |

|                                                                         |                                                                          |                                                            |                                                      |
|-------------------------------------------------------------------------|--------------------------------------------------------------------------|------------------------------------------------------------|------------------------------------------------------|
| <b>Nutrition: Care for adults with kidney diseases</b>                  | Adults with chronic kidney disease (Al-Shamsi et al. 2018)               | No costs estimated                                         | GP (10 min)                                          |
| <b>Nutrition: Care for adults with nutritional anaemia</b>              | Adults with anaemia (Global Nutrition Report)                            | No costs estimated                                         | GP (10 min)                                          |
| <b>Nutrition: Care for adults with food allergies and sensitivities</b> | People with nutrition-related allergies (Althumiri et al. 2021)          | No costs estimated                                         | GP (10 min), Specialist Doctor (30 min)              |
| <b>Management of food allergies and food intolerance</b>                | Children 0-14 x Global Prevalence of Allergies (3.0%)                    | No costs estimated                                         | GP (10 min), Specialist Doctor (30 min)              |
| <b>Preconception care</b>                                               | Married women or planning for marriage at reproductive age (15-49 years) | Estimate based on OHT drugs and supplies prices: USD 4.90  | Nurse (15 min), GP (15 min)                          |
| <b>Antenatal care</b>                                                   | Pregnant women                                                           | Estimate based on OHT drugs and supplies prices: USD 36.42 | GP (40 min), Radiographer (20 min), Midwife (40 min) |
| <b>Postnatal care</b>                                                   | Women who gave birth                                                     | No costs estimated                                         | Nurse (15 min), GP (15 min)                          |
| <b>Premarital screening program</b>                                     | Women (15-49) planning for a marriage                                    | Estimate based on OHT drugs and supplies prices: USD 15.66 | Nurse (15 min), GP (15 min)                          |

**Table S2-F. Country-specific assumptions (KSA)**

| Service                                                       | Population in Need                                                  | Drugs and Supply Costs | Labour Costs |
|---------------------------------------------------------------|---------------------------------------------------------------------|------------------------|--------------|
| <b>Screening: mammography</b>                                 | Women aged 40-70 should be screened every 2 years (50%)             | -                      | -            |
| <b>Post-treatment surveillance for breast cancer patients</b> | Based on country breast cancer incidence rate (WHO – IARC 2020)     | -                      | -            |
| <b>Post treatment surveillance for cervical cancer</b>        | Based on country cervix cancer incidence rate (WHO – IARC 2020)     | -                      | -            |
| <b>Screening: Sigmoidoscopy, colonoscopy</b>                  | People 50+ should be screened every 10 years (10%)                  | -                      | -            |
| <b>Post treatment surveillance for colorectal cancer</b>      | Based on country colorectal cancer incidence rate (WHO – IARC 2020) | -                      | -            |

**Table S3. References and assumptions used to estimate the total number of services delivered in 2019 in Oman**

| Immunization                                                                                 | Reference / Assumption                                                      |
|----------------------------------------------------------------------------------------------|-----------------------------------------------------------------------------|
| Measles vaccine                                                                              | MOH Health Statistics 2019 <sup>1</sup>                                     |
| Pentavalent vaccine                                                                          |                                                                             |
| Varicella vaccine                                                                            |                                                                             |
| DPT vaccination                                                                              |                                                                             |
| Polio vaccine                                                                                |                                                                             |
| BCG vaccine                                                                                  |                                                                             |
| Pneumococcal vaccine                                                                         |                                                                             |
| <b>Non-Communicable Diseases</b>                                                             |                                                                             |
| <b>CVD &amp; Diabetes</b>                                                                    |                                                                             |
| Screening for risk of CVD/Diabetes                                                           | Assumption: 5.0%                                                            |
| Follow-up care for those at low risk of CVD/Diabetes (Absolute Risk: 10-20%)                 | Assumption: 5.0%                                                            |
| Treatment for those with very high cholesterol but low absolute risk of CVD/Diabetes (< 20%) | Assumption derived from UHC Service Coverage Sub-Index on NCDs <sup>2</sup> |
| Treatment for those with high blood pressure but low absolute risk of CVD/Diabetes (< 20%)   |                                                                             |
| Treatment for those with absolute risk of CVD/Diabetes 20-30%                                |                                                                             |
| Treatment for those with high absolute risk of CVD/Diabetes (>30%)                           |                                                                             |
| Treatment of new cases of acute myocardial infarction (AMI) with aspirin                     |                                                                             |
| Treatment of cases with established ischaemic heart disease (IHD)                            |                                                                             |
| Treatment for those with established cerebrovascular disease and post stroke                 |                                                                             |
| Standard glycaemic control                                                                   | Estimate from MOH Health Statistics 2019 <sup>1</sup>                       |
| Intensive glycaemic control                                                                  |                                                                             |
| Referral for retinopathy screening                                                           |                                                                             |
| Neuropathy screening and preventive foot care                                                |                                                                             |
| <b>Breast Cancer</b>                                                                         |                                                                             |
| Basic breast cancer awareness                                                                | Assumption: 5.0%                                                            |
| Screening: clinical breast examination (CBE)                                                 | MOH Health Statistics <sup>1</sup>                                          |
| Diagnosis after screened with clinical breast exam                                           | Assumption derived from WHO-IARC 2020 <sup>3</sup>                          |
| <b>Cervical Cancer</b>                                                                       |                                                                             |
| Papanicolaou test (pap smear)                                                                | Assumption derived from Bahrain CR                                          |
| <b>Colorectal Cancer</b>                                                                     |                                                                             |
| Screening: faecal occult blood testing                                                       | Assumption derived from 'CBE'                                               |
| <b>Elderly and community care program</b>                                                    |                                                                             |
| Elderly and community care program                                                           | MOH Health Statistics 2019 <sup>1</sup>                                     |
| <b>Respiratory Disease</b>                                                                   |                                                                             |

|                                                                                 |                                                                         |
|---------------------------------------------------------------------------------|-------------------------------------------------------------------------|
| Asthma: Inhaled short acting beta agonist for intermittent asthma               | MOH Health Statistics 2019 <sup>1</sup>                                 |
| Asthma: Low dose inhaled fluticasone + SABA                                     |                                                                         |
| Asthma: High dose inhaled fluticasone + SABA                                    |                                                                         |
| Asthma: Theophylline + High dose inhaled fluticasone + SABA                     |                                                                         |
| Asthma: Oral Prednisolone + Theophylline + High dose inhaled fluticasone + SABA |                                                                         |
| COPD: smoking cessation                                                         |                                                                         |
| COPD: inhaled salbutamol                                                        |                                                                         |
| COPD: low-dose oral theophylline                                                |                                                                         |
| COPD: ipratropium inhaler                                                       |                                                                         |
| COPD: Exacerbation treatment with antibiotics                                   |                                                                         |
| COPD: Exacerbation treatment with oral prednisolone                             |                                                                         |
| COPD: Exacerbation treatment with oxygen                                        |                                                                         |
| Emergency care                                                                  |                                                                         |
| Average annual emergency care needs                                             | N/A                                                                     |
| <b>Child Health</b>                                                             |                                                                         |
| General                                                                         |                                                                         |
| Child general health                                                            | Assumption: 25% of GP visits (MOH Health Statistics 2019 <sup>1</sup> ) |
| Deworming                                                                       | Assumption derived from UHC Service Coverage Index (WHO) <sup>2</sup>   |
| Zinc supplementation                                                            |                                                                         |
| Diarrhea management                                                             |                                                                         |
| ORS                                                                             |                                                                         |
| Zinc (diarrhea treatment)                                                       | Assumption derived from UHC Service Coverage Index (WHO) <sup>2</sup>   |
| Antibiotics for treatment of dysentery                                          |                                                                         |
| Pneumonia                                                                       |                                                                         |
| Pneumonia treatment (children, mild cases)                                      | Estimate from MOH Health Statistics 2019 <sup>1</sup>                   |
| Malaria                                                                         |                                                                         |
| Malaria treatment (0-4, mild cases)                                             | Estimate from MOH Health Statistics 2019 <sup>1</sup>                   |
| School Health Program                                                           |                                                                         |
| Eye screening                                                                   | MOH Health Statistics 2019 <sup>1</sup>                                 |
| Dental screening                                                                |                                                                         |
| Ear screening                                                                   |                                                                         |
| <b>Nutrition</b>                                                                |                                                                         |
| Women of reproductive age and adolescent girls                                  |                                                                         |
| Intermittent iron-folic acid supplementation                                    | Assumption: 5%                                                          |
| Pregnant and lactating women                                                    |                                                                         |
| Daily iron and folic acid supplementation (pregnant women)                      | Estimate from MOH Health Statistics 2019 <sup>1</sup>                   |

|                                                                                                            |                                                                       |
|------------------------------------------------------------------------------------------------------------|-----------------------------------------------------------------------|
| Intermittent iron and folic acid supplementation (non-anaemic pregnant women)                              |                                                                       |
| Calcium supplementation for prevention and treatment of pre-eclampsia and eclampsia                        |                                                                       |
| Daily FAF, postpartum, anaemic women                                                                       | Estimate from MOH Health Statistics 2019 <sup>1</sup>                 |
| Intermittent FAF, postpartum, non-anaemic pregnant women                                                   |                                                                       |
| Adults                                                                                                     |                                                                       |
| Care for adults with low BMI                                                                               | Assumption: 2.5%                                                      |
| Children                                                                                                   |                                                                       |
| Breastfeeding counselling and support                                                                      | MOH Health Statistics 2019 <sup>1</sup>                               |
| Complementary feeding counselling and support                                                              | Assumption derived from UHC Service Coverage Index (WHO) <sup>2</sup> |
| Intermittent iron supplementation in children                                                              |                                                                       |
| Management of moderate acute malnutrition (children)                                                       | MOH Health Statistics 2019 <sup>1</sup>                               |
| Mental Health                                                                                              |                                                                       |
| Anxiety Disorders                                                                                          |                                                                       |
| Basic psychological treatment for anxiety disorders (mild cases).                                          | Estimate from MOH Health Statistics 2019 <sup>1</sup>                 |
| Basic psychosocial treatment and anti-depressant medication for anxiety disorders (mild to moderate cases) |                                                                       |
| Depression                                                                                                 |                                                                       |
| Basic psychosocial treatment for mild depression                                                           | Estimate from MOH Health Statistics 2019 <sup>1</sup>                 |
| Basic psychosocial treatment and anti-depressant medication of first episode (mild to moderate cases)      |                                                                       |
| Psychosocial care for peri-natal depression for mild cases only                                            |                                                                       |
| Psychosis                                                                                                  |                                                                       |
| Basic psychosocial support and anti-psychotic medication                                                   | Estimate from MOH Health Statistics 2019 <sup>1</sup>                 |
| Epilepsy                                                                                                   |                                                                       |
| Basic psychosocial support, advice, and follow-up only                                                     | Estimate from MOH Health Statistics 2019 <sup>1</sup>                 |
| Dementia                                                                                                   |                                                                       |
| Dementia screening, basic work up and referral to tertiary care                                            | Estimate from MOH Health Statistics 2019 <sup>1</sup>                 |
| Alcohol use/ dependence                                                                                    |                                                                       |
| Identification and assessment of new cases of alcohol use/dependence                                       | Estimate from MOH Health Statistics 2019 <sup>1</sup>                 |
| Brief interventions and follow-up for alcohol use/dependence                                               |                                                                       |
| Drug use/dependence                                                                                        |                                                                       |
| Identification and assessment of new cases of drug use/dependence                                          | Estimate from MOH Health Statistics 2019 <sup>1</sup>                 |
| Brief interventions and follow-up for drug use/dependence                                                  |                                                                       |
| Self-harm/suicide                                                                                          |                                                                       |
| Assess and care for person with self-harm                                                                  | Estimate from MOH Health Statistics 2019 <sup>1</sup>                 |
| Basic psychosocial treatment, advice, and follow-up for self-harm/suicide                                  |                                                                       |
| Pesticide intoxication management                                                                          |                                                                       |
| Maternal Newborn and Reproductive Health                                                                   |                                                                       |

|                                                                                      |                                                                                   |
|--------------------------------------------------------------------------------------|-----------------------------------------------------------------------------------|
| Family planning                                                                      |                                                                                   |
| Pill - Progestin only                                                                | MOH Health Statistics 2019 <sup>1</sup>                                           |
| Condom - Male                                                                        |                                                                                   |
| Injectable - 3 month (Depo Provera)                                                  |                                                                                   |
| IUD - Copper-T 380-A IUD (10 years)                                                  |                                                                                   |
| Implant - Implanon (3 years)                                                         | Assumption: 0.5%                                                                  |
| LAM (Lactational Amenorrhea Method)                                                  | MOH Health Statistics 2019 <sup>1</sup>                                           |
| SDM (Standard Days Method)                                                           |                                                                                   |
| Periodic abstinence                                                                  |                                                                                   |
| Withdrawal                                                                           |                                                                                   |
| Management of ectopic pregnancy care                                                 |                                                                                   |
| Ectopic case management                                                              | Assumption: 100%                                                                  |
| Pregnancy care - ANC                                                                 |                                                                                   |
| Tetanus toxoid (pregnant women)                                                      | Estimate from MOH Health Statistics 2019 <sup>1</sup>                             |
| Syphilis screening (pregnant women)                                                  | MOH Health Statistics 2019 <sup>1</sup>                                           |
| Basic ANC                                                                            |                                                                                   |
| Pregnancy care - Treatment of pregnancy complications                                |                                                                                   |
| Hypertensive disorder case management                                                | Assumption: 99%                                                                   |
| Management of pre-eclampsia (Magnesium sulphate)                                     |                                                                                   |
| Management of other pregnancy complications                                          |                                                                                   |
| Deworming (pregnant women), part of general care and not specific for pregnant women | Assumption derived from UHC Service Coverage Sub-Index on RMNH (WHO) <sup>2</sup> |
| Childbirth care - Facility births                                                    |                                                                                   |
| Parenteral administration of uterotonics                                             | Estimate from MOH Health Statistics 2019 <sup>1</sup>                             |
| Labour and delivery management                                                       |                                                                                   |
| Pre-referral management of labour complications                                      |                                                                                   |
| MgSO <sub>4</sub> for eclampsia                                                      |                                                                                   |
| Neonatal resuscitation                                                               |                                                                                   |
| Treatment of local infections (newborn)                                              |                                                                                   |
| Kangaroo mother care                                                                 |                                                                                   |
| Feeding counselling and support for low-birth-weight infants                         |                                                                                   |
| Manual removal of placenta                                                           |                                                                                   |
| Postpartum care - Treatment of sepsis                                                |                                                                                   |
| Maternal sepsis case management                                                      | Estimate from MOH Health Statistics 2019 <sup>1</sup>                             |
| Postpartum care - Other                                                              |                                                                                   |
| Mastitis                                                                             | Estimate from UHC Service Coverage Sub-Index on RMNH (WHO) <sup>2</sup>           |
| Treatment of postpartum haemorrhage                                                  | Assumption: 100%                                                                  |



|                                                                 |                                                       |
|-----------------------------------------------------------------|-------------------------------------------------------|
| Other sexual and reproductive health                            |                                                       |
| Treatment of urinary tract infection (UTI)                      | MOH Health Statistics 2019 <sup>1</sup>               |
| Identification and management of infertility                    |                                                       |
| Treatment of syphilis                                           |                                                       |
| Treatment of gonorrhoea                                         |                                                       |
| Treatment of chlamydia                                          |                                                       |
| Treatment of trichomoniasis                                     |                                                       |
| Treatment of PID (Pelvic Inflammatory Disease)- mild cases only |                                                       |
| Menopause Program                                               |                                                       |
| Screen for urogenital dryness                                   | Assumption: 7.5%                                      |
| Screen for mood disorders                                       | Assumption: 7.5%                                      |
| General Practice                                                |                                                       |
| General Practice                                                | Estimate from MOH Health Statistics 2019 <sup>1</sup> |
| Oral Care                                                       |                                                       |
| Dental cleaning and preventive care                             | MOH Health Statistics 2019 <sup>1</sup>               |

**Table S4. References and assumptions used to estimate the total number of services delivered in 2019 in Bahrain**

|                                                                                              |                                                       |
|----------------------------------------------------------------------------------------------|-------------------------------------------------------|
| Immunization                                                                                 |                                                       |
| Rotavirus vaccine                                                                            | MOH Health Statistics 2019 <sup>4</sup>               |
| Measles vaccine                                                                              |                                                       |
| DPT vaccine                                                                                  |                                                       |
| Hib vaccine                                                                                  |                                                       |
| Hep B vaccine                                                                                |                                                       |
| Polio vaccine                                                                                |                                                       |
| BCG vaccine                                                                                  |                                                       |
| Pneumococcal vaccine                                                                         |                                                       |
| Varicella vaccine                                                                            | Estimate from MOH Health Statistics 2019 <sup>4</sup> |
| Influenza vaccine                                                                            | MOH Health Statistics 2019 <sup>4</sup>               |
| Non-Communicable Diseases                                                                    |                                                       |
| CVD & Diabetes                                                                               |                                                       |
| Screening for risk of CVD/Diabetes                                                           | Assumption: 5.0%                                      |
| Follow-up care for those at low risk of CVD/Diabetes (Absolute Risk: 10-20%)                 | Estimate from MOH Health Statistics 2019 <sup>4</sup> |
| Treatment for those with very high cholesterol but low absolute risk of CVD/Diabetes (< 20%) |                                                       |
| Treatment for those with high blood pressure but low absolute risk of CVD/Diabetes (< 20%)   |                                                       |
| Treatment for those with absolute risk of CVD/Diabetes 20-30%                                |                                                       |

|                                                                              |                                                                                                 |
|------------------------------------------------------------------------------|-------------------------------------------------------------------------------------------------|
| Treatment for those with high absolute risk of CVD/Diabetes (>30%)           |                                                                                                 |
| Treatment of new cases of acute myocardial infarction (AMI) with aspirin     |                                                                                                 |
| Treatment of cases with established ischaemic heart disease (IHD)            |                                                                                                 |
| Treatment for those with established cerebrovascular disease and post stroke |                                                                                                 |
| Treatment of cases with rheumatic heart disease (with benzathine penicillin) |                                                                                                 |
| Standard glycaemic control                                                   | Estimate from MOH Health Statistics 2019 <sup>4</sup>                                           |
| Intensive glycaemic control                                                  |                                                                                                 |
| Retinopathy screening                                                        |                                                                                                 |
| Neuropathy screening and preventive foot care                                |                                                                                                 |
| Breast Cancer                                                                |                                                                                                 |
| Basic breast cancer awareness                                                | Assumption: 5.0%                                                                                |
| Screening: clinical breast examination (CBE)                                 | MOH Health Statistics 2019 <sup>4</sup>                                                         |
| Cervical Cancer                                                              |                                                                                                 |
| Papanicolaou test (pap smear)                                                | MOH Health Statistics 2019 <sup>4</sup>                                                         |
| Colorectal Cancer                                                            |                                                                                                 |
| Screening: faecal occult blood testing                                       | Estimate from 'CBE' and 'pap smear'                                                             |
| Respiratory Disease                                                          |                                                                                                 |
| Asthma: Inhaled short acting beta agonist for intermittent asthma            | Assumption derived from UHC Service Coverage Sub-Index on NCDs (WHO) <sup>2</sup>               |
| Asthma: low dose inhaled beclomethasone + SABA                               |                                                                                                 |
| Asthma: high dose inhaled beclomethasone + SABA                              |                                                                                                 |
| COPD: smoking cessation                                                      |                                                                                                 |
| COPD: inhaled salbutamol                                                     |                                                                                                 |
| COPD: low-dose oral theophylline                                             |                                                                                                 |
| COPD: ipratropium inhaler                                                    |                                                                                                 |
| COPD: exacerbation treatment with antibiotics                                |                                                                                                 |
| COPD: exacerbation treatment with oral prednisolone                          |                                                                                                 |
| Emergency care                                                               |                                                                                                 |
| Average annual emergency care needs                                          | N/A                                                                                             |
| Child Health                                                                 |                                                                                                 |
| General Health                                                               |                                                                                                 |
| Child general health                                                         | Assumption: 25% of total number of GP Visit (MOH Health Statistics 2019 <sup>4</sup> )          |
| School Health                                                                |                                                                                                 |
| School Health                                                                | MOH Health Statistics 2019 <sup>4</sup>                                                         |
| Deworming                                                                    |                                                                                                 |
| Deworming                                                                    | Assumption derived from UHC Service Coverage Sub-Index on Infectious Disease (WHO) <sup>2</sup> |
| Diarrhea management                                                          |                                                                                                 |

|                                                                                                           |                                                                                                 |
|-----------------------------------------------------------------------------------------------------------|-------------------------------------------------------------------------------------------------|
| ORS                                                                                                       | Assumption derived from UHC Service Coverage Sub-Index on Infectious Disease (WHO) <sup>2</sup> |
| Pneumonia                                                                                                 |                                                                                                 |
| Pneumonia treatment (children)                                                                            | Assumption derived from UHC Service Coverage Sub-Index on Infectious Disease (WHO) <sup>2</sup> |
| Nutrition                                                                                                 |                                                                                                 |
| Women of reproductive age and adolescent girls                                                            |                                                                                                 |
| Intermittent iron-folic acid supplementation                                                              | Assumption: 5.0%                                                                                |
| Pregnant and lactating women                                                                              |                                                                                                 |
| Daily iron and folic acid supplementation (pregnant women)                                                | Assumption derived from UHC Service Coverage Sub-Index on RMCH (WHO) <sup>2</sup>               |
| Intermittent iron and folic acid supplementation (non-anaemic pregnant women)                             |                                                                                                 |
| Adults                                                                                                    |                                                                                                 |
| Care for adults with low BMI                                                                              | Estimate from MOH Health Statistics 2019 <sup>4</sup>                                           |
| Children                                                                                                  |                                                                                                 |
| Breastfeeding counselling and support                                                                     | Assumption derived from UHC Service Coverage Sub-Index on RMCH (WHO) <sup>2</sup>               |
| Complementary feeding counselling and support                                                             |                                                                                                 |
| Intermittent iron supplementation in children                                                             | Assumption derived from UHC Service Coverage Index (WHO) <sup>2</sup>                           |
| Mental Health                                                                                             |                                                                                                 |
| Anxiety Disorders                                                                                         |                                                                                                 |
| Basic psychological treatment for anxiety disorders (mild cases).                                         | Estimate from MOH Health Statistics 2019 <sup>4</sup>                                           |
| Basic psychosocial treatment and anti-depressant medication for anxiety disorders (moderate-severe cases) |                                                                                                 |
| Depression                                                                                                |                                                                                                 |
| Basic psychosocial treatment for mild depression                                                          | Estimate from MOH Health Statistics 2019 <sup>4</sup>                                           |
| Basic psychosocial treatment and anti-depressant medication of first episode moderate-severe cases        |                                                                                                 |
| Maternal Newborn and Reproductive Health                                                                  |                                                                                                 |
| Family planning                                                                                           |                                                                                                 |
| Pill - Progestin only                                                                                     | United Nations 2019 <sup>5</sup>                                                                |
| Injectable - 3 month (Depo Provera)                                                                       |                                                                                                 |
| Other contraceptives                                                                                      |                                                                                                 |
| IUCD follow-up care                                                                                       | Assumption derived from UHC Service Coverage Index (WHO) <sup>2</sup>                           |
| Pregnancy Care                                                                                            |                                                                                                 |
| Tetanus toxoid (pregnant women)                                                                           | Estimate from MOH Health Statistics 2019 <sup>4</sup>                                           |
| Syphilis detection and treatment (pregnant women)                                                         |                                                                                                 |
| Basic ANC                                                                                                 |                                                                                                 |
| Breast feeding education and advices                                                                      |                                                                                                 |
| Pregnancy care - Treatment of pregnancy complications                                                     |                                                                                                 |
| Deworming (pregnant women)                                                                                | Assumption: 100%                                                                                |
| Postpartum care - Other                                                                                   |                                                                                                 |

|                                                |                                                                                   |
|------------------------------------------------|-----------------------------------------------------------------------------------|
| Mastitis                                       | Assumption derived from UHC Service Coverage Sub-Index on RMCH (WHO) <sup>2</sup> |
| Breast feeding education and advices           |                                                                                   |
| Treatment of postpartum haemorrhage            | Assumption: 100%                                                                  |
| Other sexual and reproductive health           |                                                                                   |
| Treatment of urinary tract infection (UTI)     | Assumption derived from UHC Service Coverage Index (WHO) <sup>2</sup>             |
| Identification and management of infertility   |                                                                                   |
| Treatment of syphilis                          |                                                                                   |
| Treatment of gonorrhoea                        |                                                                                   |
| Treatment of chlamydia                         |                                                                                   |
| Treatment of trichomoniasis                    |                                                                                   |
| Treatment of PID (Pelvic Inflammatory Disease) |                                                                                   |
| General Practice                               |                                                                                   |
| General Practice                               | MOH Health Statistics 2019 <sup>4</sup>                                           |
| Oral Care                                      |                                                                                   |
| Dental cleaning and preventive care            | MOH Health Statistics 2019 <sup>4</sup>                                           |

**Table S5. References and assumptions used to estimate the total number of services delivered in 2019 in Kuwait**

|                             |                                         |
|-----------------------------|-----------------------------------------|
| Immunization                |                                         |
| Rotavirus vaccine           | MOH Health Statistics 2019 <sup>6</sup> |
| Measles vaccine             |                                         |
| Pentavalent vaccine         |                                         |
| DPT vaccine                 |                                         |
| Polio vaccine               |                                         |
| BCG vaccine                 |                                         |
| Pneumococcal vaccine        |                                         |
| Varicella vaccine           |                                         |
| DT Adult                    |                                         |
| Measles vaccine             | Provided by MOH                         |
| Varicella vaccine           |                                         |
| Influenza vaccine           |                                         |
| Meningococcal vaccine       |                                         |
| DT paediatrics              |                                         |
| Anti-Rabies                 |                                         |
| Heb B vaccine (paediatrics) |                                         |
| TT                          |                                         |

|                                                                                              |                                                                                   |
|----------------------------------------------------------------------------------------------|-----------------------------------------------------------------------------------|
| Non-Communicable Diseases                                                                    |                                                                                   |
| CVD & Diabetes                                                                               |                                                                                   |
| Screening for risk of CVD/Diabetes                                                           | Assumption: CR = 5.0%                                                             |
| Follow-up care for those at low risk of CVD/Diabetes (Absolute Risk: 10-20%)                 | Assumption derived from UHC Service Coverage Sub-Index on NCDs (WHO) <sup>2</sup> |
| Treatment for those with very high cholesterol but low absolute risk of CVD/Diabetes (< 20%) |                                                                                   |
| Treatment for those with high blood pressure but low absolute risk of CVD/Diabetes (< 20%)   |                                                                                   |
| Treatment for those with absolute risk of CVD/Diabetes 20-30%                                |                                                                                   |
| Treatment for those with high absolute risk of CVD/Diabetes (>30%)                           |                                                                                   |
| Treatment of new cases of acute myocardial infarction (AMI) with aspirin                     | Provided by MOH                                                                   |
| Treatment of cases with established ischaemic heart disease (IHD)                            |                                                                                   |
| Treatment for those with established cerebrovascular disease and post stroke                 |                                                                                   |
| Standard glycaemic control                                                                   | Estimate from MOH Health Statistics 2019 <sup>6</sup>                             |
| Intensive glycaemic control                                                                  |                                                                                   |
| Retinopathy screening                                                                        |                                                                                   |
| Neuropathy screening and preventive foot care                                                |                                                                                   |
| Breast Cancer                                                                                |                                                                                   |
| Basic breast cancer awareness                                                                | Assumption: CR = 5.0%                                                             |
| Screening: clinical breast examination                                                       | Assumption derived from Oman                                                      |
| Diagnosis after screened with clinical breast exam                                           | Estimate from WHO-IARC 2020 <sup>3</sup>                                          |
| Cervical Cancer                                                                              |                                                                                   |
| Papanicolaou test (pap smear)                                                                | Provided by MOH                                                                   |
| Colorectal Cancer                                                                            |                                                                                   |
| Screening: faecal occult blood testing                                                       | Provided by MOH                                                                   |
| Respiratory Disease                                                                          |                                                                                   |
| Asthma: inhaled short acting beta agonist for intermittent asthma                            | Estimation from data provided by MOH                                              |
| Asthma: low dose inhaled beclomethasone + SABA                                               |                                                                                   |
| Asthma: high dose inhaled beclomethasone + SABA                                              |                                                                                   |
| COPD: smoking cessation                                                                      |                                                                                   |
| COPD: inhaled salbutamol                                                                     |                                                                                   |
| COPD: low-dose oral theophylline                                                             |                                                                                   |
| COPD: ipratropium inhaler                                                                    |                                                                                   |
| COPD: exacerbation treatment with antibiotics                                                |                                                                                   |
| COPD: exacerbation treatment with oral prednisolone                                          |                                                                                   |
| Emergency care                                                                               |                                                                                   |
| Average annual emergency care needs                                                          | N/A                                                                               |
| Child Health                                                                                 |                                                                                   |

|                                                                                                           |                                                                                   |
|-----------------------------------------------------------------------------------------------------------|-----------------------------------------------------------------------------------|
| General Health                                                                                            |                                                                                   |
| Child general health                                                                                      | MOH Health Statistics 2019 <sup>6</sup>                                           |
| Deworming                                                                                                 |                                                                                   |
| Deworming                                                                                                 | Provided by MOH                                                                   |
| Diarrhea management                                                                                       |                                                                                   |
| ORS                                                                                                       | Estimate based on data provided by MOH                                            |
| Pneumonia                                                                                                 |                                                                                   |
| Pneumonia treatment (children)                                                                            | Provided by MOH                                                                   |
| Nutrition                                                                                                 |                                                                                   |
| Women of reproductive age and adolescent girls                                                            |                                                                                   |
| Intermittent iron-folic acid supplementation                                                              | Estimate from data provided by MOH                                                |
| Pregnant and lactating women                                                                              |                                                                                   |
| Daily iron and folic acid supplementation (pregnant women)                                                | Assumption derived from UHC Service Coverage Sub-Index on MRCH (WHO) <sup>2</sup> |
| Intermittent iron and folic acid supplementation (non-anaemic pregnant women)                             |                                                                                   |
| Adults                                                                                                    |                                                                                   |
| Care for adults with low BMI                                                                              | Assumption derived from Bahrain                                                   |
| Children                                                                                                  |                                                                                   |
| Breastfeeding counselling and support                                                                     | Assumption derived from UHC Service Coverage Sub-Index on MRCH (WHO) <sup>2</sup> |
| Complementary feeding counselling and support                                                             |                                                                                   |
| Intermittent iron supplementation in children                                                             | Assumption derived from UHC Service Coverage Index (WHO) <sup>2</sup>             |
| Mental Health                                                                                             |                                                                                   |
| Anxiety Disorders                                                                                         |                                                                                   |
| Basic psychological treatment for anxiety disorders (mild cases).                                         | OneHealth Tool <sup>7</sup>                                                       |
| Basic psychosocial treatment and anti-depressant medication for anxiety disorders (moderate-severe cases) |                                                                                   |
| Depression                                                                                                |                                                                                   |
| Basic psychosocial treatment for mild depression                                                          | OneHealth Tool <sup>7</sup>                                                       |
| Basic psychosocial treatment and anti-depressant medication of first episode moderate-severe cases        |                                                                                   |
| Maternal Newborn and Reproductive Health                                                                  |                                                                                   |
| Family planning                                                                                           |                                                                                   |
| Pill - Progestin only                                                                                     | United Nations 2019 <sup>5</sup>                                                  |
| Injectable - 3 month (depo provera)                                                                       |                                                                                   |
| Other contraceptives                                                                                      |                                                                                   |
| IUCD follow-up care                                                                                       | Assumption derived from UHC Service Coverage Index (WHO) <sup>2</sup>             |
| Management of abortion complications                                                                      |                                                                                   |
| Post-abortion case management                                                                             | Assumption (70.0%)                                                                |
| Pregnancy Care                                                                                            |                                                                                   |

|                                                       |                                                                       |
|-------------------------------------------------------|-----------------------------------------------------------------------|
| Tetanus toxoid (pregnant women)                       | Estimate based on data provided by MOH.                               |
| Syphilis detection and treatment (pregnant women)     |                                                                       |
| Basic ANC                                             |                                                                       |
| Breast feeding education and advices                  |                                                                       |
| Pregnancy care - Treatment of pregnancy complications |                                                                       |
| Deworming (pregnant women)                            | Assumption (100.0%)                                                   |
| Postpartum care - Other                               |                                                                       |
| Mastitis                                              | Assumption derived from UHC Service Coverage Index (WHO) <sup>2</sup> |
| Breast feeding education and advices                  |                                                                       |
| Treatment of postpartum haemorrhage                   | Estimate based on data provided by MOH.                               |
| Other sexual and reproductive health                  |                                                                       |
| Treatment of urinary tract infection (UTI)            | Provided by MOH                                                       |
| Cervical cancer screening                             |                                                                       |
| Identification and management of infertility          |                                                                       |
| Treatment of syphilis                                 | Estimate based on data provided by MOH                                |
| Treatment of gonorrhoea                               | Provided by MOH                                                       |
| Treatment of chlamydia                                | Estimate based on data provided by MOH                                |
| Treatment of trichomoniasis                           |                                                                       |
| Treatment of PID (Pelvic Inflammatory Disease)        | Provided by MOH                                                       |
| Other                                                 |                                                                       |
| Management of pre pubertal problems                   | Provided by MOH                                                       |
| Management of PCO                                     |                                                                       |
| Management of hirsutism                               | Estimate based on data provided by MOH                                |
| Management of irregular cycles                        | Provided by MOH                                                       |
| Management of amenorrhoea                             |                                                                       |
| Management of abnormal uterine bleeding               |                                                                       |
| Management of mild endometriosis                      |                                                                       |
| Postmenopausal care                                   |                                                                       |
| General Practice                                      |                                                                       |
| General Practice                                      | MOH Health Statistics 2019 <sup>6</sup>                               |
| Oral Care                                             |                                                                       |
| Dental cleaning and preventive care                   | MOH Health Statistics 2019 <sup>6</sup>                               |

**Table S6. References and assumptions used to estimate the total number of services delivered in 2019 in Qatar**

|                                                                                              |                                                                    |
|----------------------------------------------------------------------------------------------|--------------------------------------------------------------------|
| Immunization                                                                                 |                                                                    |
| Rotavirus vaccine                                                                            | Global Health Observatory (WHO) <sup>2</sup>                       |
| Measles vaccine                                                                              | Qatar Health Statistics 2019 <sup>8</sup>                          |
| DPT vaccine                                                                                  |                                                                    |
| Hib vaccine                                                                                  |                                                                    |
| Hep B vaccine                                                                                |                                                                    |
| Polio vaccine                                                                                |                                                                    |
| BCG vaccine                                                                                  |                                                                    |
| Pneumococcal vaccine                                                                         |                                                                    |
| Varicella vaccine                                                                            | Estimate from Qatar Health Statistics 2019 <sup>8</sup>            |
| Influenza vaccine                                                                            | Assumption derived from GCC countries                              |
| Non-Communicable Diseases                                                                    |                                                                    |
| CVD & Diabetes                                                                               |                                                                    |
| Screening for risk of CVD/Diabetes                                                           | Assumption: 5%                                                     |
| Follow-up care for those at low risk of CVD/Diabetes (Absolute Risk: 10-20%)                 | Estimate from PHCC Official Statistics                             |
| Treatment for those with very high cholesterol but low absolute risk of CVD/Diabetes (< 20%) |                                                                    |
| Treatment for those with high blood pressure but low absolute risk of CVD/Diabetes (< 20%)   |                                                                    |
| Treatment for those with absolute risk of CVD/Diabetes 20-30%                                |                                                                    |
| Treatment for those with high absolute risk of CVD/Diabetes (>30%)                           |                                                                    |
| Treatment of new cases of acute myocardial infarction (AMI) with aspirin                     |                                                                    |
| Treatment of cases with established ischaemic heart disease (IHD)                            |                                                                    |
| Treatment for those with established cerebrovascular disease and post stroke                 |                                                                    |
| Treatment of cases with rheumatic heart disease (with benzathine penicillin)                 |                                                                    |
| Standard glycaemic control                                                                   |                                                                    |
| Intensive glycaemic control                                                                  |                                                                    |
| Retinopathy screening                                                                        | Assumption: 1%                                                     |
| Neuropathy screening and preventive foot care                                                | Assumption: 1%                                                     |
| Breast Cancer                                                                                |                                                                    |
| Basic breast cancer awareness                                                                | Assumption: 5%                                                     |
| Screening: Clinical Breast Examination                                                       | Assumption derived from GCC countries and PHCC Official Statistics |
| Cervical Cancer                                                                              |                                                                    |
| Papanicolaou test (Pap smear)                                                                | Assumption derived from GCC countries and PHCC Official Statistics |
| Colorectal Cancer                                                                            |                                                                    |
| Screening: Fecal occult blood testing                                                        | Assumption derived from GCC countries and PHCC Official Statistics |
| Allied Health                                                                                |                                                                    |
| Allied Health                                                                                | PHCC Official Statistics                                           |



|                                                                                                           |                                                                                         |
|-----------------------------------------------------------------------------------------------------------|-----------------------------------------------------------------------------------------|
| Respiratory Disease                                                                                       |                                                                                         |
| Asthma: Inhaled short acting beta agonist for intermittent asthma                                         | PHCC Official Statistics                                                                |
| Asthma: Low dose inhaled beclomethasone + SABA                                                            |                                                                                         |
| Asthma: High dose inhaled beclomethasone + SABA                                                           |                                                                                         |
| COPD: Smoking cessation                                                                                   |                                                                                         |
| COPD: Inhaled salbutamol                                                                                  |                                                                                         |
| COPD: Low-dose oral theophylline                                                                          |                                                                                         |
| COPD: Ipratropium inhaler                                                                                 |                                                                                         |
| COPD: exacerbation treatment with antibiotics                                                             |                                                                                         |
| COPD: exacerbation treatment with oral prednisolone                                                       |                                                                                         |
| Emergency care                                                                                            |                                                                                         |
| Average annual emergency care needs                                                                       | N/A                                                                                     |
| Child Health                                                                                              |                                                                                         |
| General Health                                                                                            |                                                                                         |
| Child General Health                                                                                      | Estimate from PHCC Official Statistics                                                  |
| General Health                                                                                            |                                                                                         |
| School Health                                                                                             | PHCC Official Statistics                                                                |
| Deworming                                                                                                 |                                                                                         |
| Deworming                                                                                                 | PHCC Official Statistics                                                                |
| Diarrhea management                                                                                       |                                                                                         |
| ORS                                                                                                       | Assumption derived from UHC Service Coverage Index for Infectious Diseases <sup>2</sup> |
| Pneumonia                                                                                                 |                                                                                         |
| Pneumonia treatment (children)                                                                            | Assumption derived from UHC Service Coverage Index for Infectious Diseases <sup>2</sup> |
| Nutrition                                                                                                 |                                                                                         |
| Women of reproductive age and adolescent girls                                                            |                                                                                         |
| Intermittent iron-folic acid supplementation                                                              | Assumption: 50%                                                                         |
| Pregnant and lactating women                                                                              |                                                                                         |
| Daily iron and folic acid supplementation (pregnant women)                                                | Estimate from data provided by PHCC Official Statistics and World Bank <sup>9</sup>     |
| Intermittent iron and folic acid supplementation (non-anaemic pregnant women)                             |                                                                                         |
| Adults                                                                                                    |                                                                                         |
| Care for adults with low BMI                                                                              | Assumption: 2.5%                                                                        |
| Children                                                                                                  |                                                                                         |
| Breastfeeding counselling and support                                                                     | Assumption: 70%                                                                         |
| Intermittent iron supplementation in children                                                             | Assumption derived from Zainel et al. (2018) <sup>10</sup>                              |
| Mental Health                                                                                             |                                                                                         |
| Anxiety Disorders                                                                                         |                                                                                         |
| Basic psychological treatment for anxiety disorders (mild cases).                                         | PHCC Official Statistics                                                                |
| Basic psychosocial treatment and anti-depressant medication for anxiety disorders (moderate-severe cases) |                                                                                         |
| Depression                                                                                                |                                                                                         |

|                                                                                                    |                                        |
|----------------------------------------------------------------------------------------------------|----------------------------------------|
| Basic psychosocial treatment for mild depression                                                   | PHCC Official Statistics               |
| Basic psychosocial treatment and anti-depressant medication of first episode moderate-severe cases |                                        |
| Maternal Newborn and Reproductive Health                                                           |                                        |
| Family planning                                                                                    |                                        |
| Contraception Management                                                                           | Estimate from PHCC Official Statistics |
| Management of abortion complications                                                               |                                        |
| Post-abortion case management                                                                      | Estimate from PHCC Official Statistics |
| Pregnancy Care                                                                                     |                                        |
| Tetanus toxoid (pregnant women)                                                                    | Estimate from PHCC Official Statistics |
| Syphilis detection and treatment (pregnant women)                                                  |                                        |
| Basic ANC                                                                                          |                                        |
| Breast feeding education and advices                                                               |                                        |
| Postpartum care - Other                                                                            |                                        |
| Postpartum Care Examination                                                                        | PHCC Official Statistics               |
| Treatment of postpartum haemorrhage                                                                |                                        |
| Other sexual and reproductive health                                                               |                                        |
| Treatment of urinary tract infection (UTI)                                                         | PHCC Official Statistics               |
| Identification and management of infertility                                                       |                                        |
| Treatment of syphilis                                                                              |                                        |
| Treatment of gonorrhoea                                                                            |                                        |
| Treatment of chlamydia                                                                             |                                        |
| Treatment of trichomoniasis                                                                        |                                        |
| Treatment of PID (Pelvic Inflammatory Disease)                                                     |                                        |
| General Practice                                                                                   |                                        |
| General Practice                                                                                   | PHCC Official Statistics               |
| Oral Care and Cancer                                                                               |                                        |
| Dental cleaning and preventive care                                                                | PHCC Official Statistics               |

**Table S7. References and assumptions used to estimate the total number of services delivered in 2019 in UAE**

|                      |                                         |
|----------------------|-----------------------------------------|
| Immunization         | WHO-UNICEF Estimates 2019 <sup>11</sup> |
| Rotavirus vaccine    |                                         |
| Measles vaccine      |                                         |
| DPT vaccine          |                                         |
| Hib vaccine          |                                         |
| Hep B vaccine        |                                         |
| Polio vaccine        |                                         |
| BCG vaccine          |                                         |
| Pneumococcal vaccine |                                         |

|                                                                                              |                                                                                   |                                                                                                                 |
|----------------------------------------------------------------------------------------------|-----------------------------------------------------------------------------------|-----------------------------------------------------------------------------------------------------------------|
| HPV vaccine                                                                                  | HPV Information Centre <sup>12</sup>                                              |                                                                                                                 |
| Influenza vaccine                                                                            | Assumption derived from Bahrain                                                   |                                                                                                                 |
| Non-Communicable Diseases                                                                    |                                                                                   |                                                                                                                 |
| CVD & Diabetes                                                                               |                                                                                   |                                                                                                                 |
| Screening for risk of CVD/Diabetes                                                           | Assumption: 5.0%                                                                  |                                                                                                                 |
| Follow-up care for those at low risk of CVD/Diabetes (Absolute Risk: 10-20%)                 | Assumption: 5.0%                                                                  |                                                                                                                 |
| Treatment for those with very high cholesterol but low absolute risk of CVD/Diabetes (< 20%) | Assumption derived from UHC Service Coverage Sub-Index on NCDs (WHO) <sup>2</sup> |                                                                                                                 |
| Treatment for those with high blood pressure but low absolute risk of CVD/Diabetes (< 20%)   |                                                                                   |                                                                                                                 |
| Treatment for those with absolute risk of CVD/Diabetes 20-30%                                |                                                                                   |                                                                                                                 |
| Treatment for those with high absolute risk of CVD/Diabetes (>30%)                           |                                                                                   |                                                                                                                 |
| Treatment of new cases of acute myocardial infarction (AMI) with aspirin                     |                                                                                   |                                                                                                                 |
| Treatment of cases with established ischaemic heart disease (IHD)                            |                                                                                   |                                                                                                                 |
| Treatment for those with established cerebrovascular disease and post stroke                 |                                                                                   |                                                                                                                 |
| Treatment of cases with rheumatic heart disease (with benzathine penicillin)                 |                                                                                   |                                                                                                                 |
| Standard glycaemic control                                                                   |                                                                                   | Estimate from OneHealth Tool <sup>7</sup> and Dubai Government Annual Health Statistics Book 2019 <sup>13</sup> |
| Intensive glycaemic control                                                                  |                                                                                   |                                                                                                                 |
| Retinopathy screening                                                                        |                                                                                   |                                                                                                                 |
| Neuropathy screening and preventive foot care                                                |                                                                                   |                                                                                                                 |
| Breast Cancer                                                                                |                                                                                   |                                                                                                                 |
| Basic breast cancer awareness                                                                | Assumption: 5.0%                                                                  |                                                                                                                 |
| Screening: Clinical Breast Examination                                                       | Estimate from Bahrain                                                             |                                                                                                                 |
| Screening: Mammography                                                                       | Assumption: 0.9%                                                                  |                                                                                                                 |
| Diagnosis after Screened with Clinical Breast Exam                                           | Estimation from WHO IARC 2020 <sup>3</sup>                                        |                                                                                                                 |
| Diagnosis after Screened with Mammography                                                    |                                                                                   |                                                                                                                 |
| Diagnosis without screening for breast cancer                                                |                                                                                   |                                                                                                                 |
| Cervical Cancer                                                                              |                                                                                   |                                                                                                                 |
| Visual inspection with acetic acid (VIA)                                                     | Assumption: 5.0%                                                                  |                                                                                                                 |
| Papanicolaou test (Pap smear)                                                                | Assumption: 9.3%                                                                  |                                                                                                                 |
| HPV DNA + VIA                                                                                | Assumption: 5.0%                                                                  |                                                                                                                 |
| Colorectal Cancer                                                                            |                                                                                   |                                                                                                                 |
| Screening: faecal immunochemical test                                                        | Assumption : 0.5%                                                                 |                                                                                                                 |
| Screening: faecal occult blood testing                                                       |                                                                                   |                                                                                                                 |
| Diagnosis for colorectal cancer screened with FIT                                            | Assumption: 100%                                                                  |                                                                                                                 |
| Diagnosis for colorectal cancer screened with FOBT                                           |                                                                                   |                                                                                                                 |
| Diagnosis without screening for colorectal cancer (symptom based)                            |                                                                                   |                                                                                                                 |
| Respiratory Disease                                                                          |                                                                                   |                                                                                                                 |
| Asthma: Inhaled short acting beta agonist for intermittent asthma                            | Assumption derived from UHC Service Coverage Sub-Index on NCDs (WHO) <sup>3</sup> |                                                                                                                 |
| Asthma: Low dose inhaled beclomethasone + SABA                                               |                                                                                   |                                                                                                                 |

|                                                                                                           |                                                                            |
|-----------------------------------------------------------------------------------------------------------|----------------------------------------------------------------------------|
| Asthma: High dose inhaled beclomethasone + SABA                                                           |                                                                            |
| COPD: Smoking cessation                                                                                   |                                                                            |
| COPD: Inhaled salbutamol                                                                                  |                                                                            |
| COPD: Ipratropium inhaler                                                                                 |                                                                            |
| COPD: exacerbation treatment with antibiotics                                                             |                                                                            |
| COPD: exacerbation treatment with oral prednisolone                                                       |                                                                            |
| COPD: exacerbation treatment with oxygen                                                                  |                                                                            |
| Emergency care                                                                                            |                                                                            |
| Average annual emergency care needs                                                                       | N/A                                                                        |
| Oral Care                                                                                                 |                                                                            |
| Oral and dental care                                                                                      | Estimate from Dubai Government Annual Health Statistics Book <sup>13</sup> |
| Child Health                                                                                              |                                                                            |
| General Health (Children)                                                                                 |                                                                            |
| General Health (Children)                                                                                 | Assumption: 25% of GP visits                                               |
| Diarrhea management                                                                                       |                                                                            |
| ORS                                                                                                       |                                                                            |
| Antibiotics for treatment of dysentery                                                                    | Assumption derived from UHC Service Coverage Index (WHO) <sup>2</sup>      |
| Pneumonia                                                                                                 |                                                                            |
| Pneumonia treatment (children)                                                                            | Assumption derived from UHC Service Coverage Index (WHO) <sup>2</sup>      |
| Routine Child Health Care Visit                                                                           |                                                                            |
| Routine Child Health Care Visit (< 1 year)                                                                |                                                                            |
| Routine Child Health Care Visit (1-5 years)                                                               | Assumption derived from UHC Service Coverage Index (WHO) <sup>2</sup>      |
| Nutrition                                                                                                 |                                                                            |
| Adults                                                                                                    |                                                                            |
| Care for Obese adults                                                                                     |                                                                            |
| Care for Diabetic adults                                                                                  |                                                                            |
| Care for adults with hyperuricemia                                                                        |                                                                            |
| Care for adults with kidney diseases                                                                      |                                                                            |
| Care for adults with nutritional anaemia                                                                  |                                                                            |
| Care for adults with food allergies and sensitivities                                                     | Assumption: 5.0%                                                           |
| All populations                                                                                           |                                                                            |
| Food fortification                                                                                        | Assumption: 100%                                                           |
| Children                                                                                                  |                                                                            |
| Management of severe malnutrition                                                                         |                                                                            |
| Management of moderate acute malnutrition                                                                 | Assumption derived from UHC Service Coverage Index (WHO) <sup>2</sup>      |
| Management of Food allergies or Food intolerances                                                         | Assumption: 5.0%                                                           |
| Mental Health                                                                                             |                                                                            |
| Anxiety Disorders                                                                                         |                                                                            |
| Basic psychosocial treatment and anti-depressant medication for anxiety disorders (moderate-severe cases) | Estimate from Abu Dhabi Government Annual Health Statistics <sup>14</sup>  |

|                                                                                                                           |                                                                                   |
|---------------------------------------------------------------------------------------------------------------------------|-----------------------------------------------------------------------------------|
| Basic psychological treatment for anxiety disorders (mild cases).                                                         |                                                                                   |
| Depression                                                                                                                |                                                                                   |
| Basic psychosocial treatment for mild depression                                                                          | Estimate from Abu Dhabi Government Annual Health Statistics <sup>14</sup>         |
| Basic psychosocial treatment and anti-depressant medication of first episode moderate-severe cases                        |                                                                                   |
| Intensive psychosocial treatment and anti-depressant medication of recurrent moderate-severe cases on a maintenance basis |                                                                                   |
| Psychological care for peri-natal                                                                                         |                                                                                   |
| Psychosis                                                                                                                 |                                                                                   |
| Basic psychosocial support and anti-psychotic medication                                                                  | Estimate from Abu Dhabi Government Annual Health Statistics <sup>14</sup>         |
| Bipolar Disorders                                                                                                         |                                                                                   |
| Basic psychosocial treatment, advice, and follow-up for bipolar disorder, plus mood-stabilizing medication                | Estimate from Abu Dhabi Government Annual Health Statistics <sup>14</sup>         |
| Epilepsy                                                                                                                  |                                                                                   |
| Basic psychosocial support, advice, and follow-up, plus anti-epileptic medication                                         | Estimate from Abu Dhabi Government Annual Health Statistics <sup>14</sup>         |
| Developmental Disorders                                                                                                   |                                                                                   |
| Basic psychosocial treatment, advice, and follow-up for developmental disorders                                           | Estimate from Abu Dhabi Government Annual Health Statistics <sup>14</sup>         |
| Conduct Disorders                                                                                                         |                                                                                   |
| Basic psychosocial treatment, advice, and follow-up for behavioural disorders                                             | Estimate from Abu Dhabi Government Annual Health Statistics <sup>14</sup>         |
| Attention Disorders                                                                                                       |                                                                                   |
| Methylphenidate medication                                                                                                | Estimate from Abu Dhabi Government Annual Health Statistics <sup>14</sup>         |
| Dementia                                                                                                                  |                                                                                   |
| Assessment, diagnosis, advice, and follow-up for dementia                                                                 | Estimate from Abu Dhabi Government Annual Health Statistics <sup>14</sup>         |
| Pharmacological treatment of dementia                                                                                     |                                                                                   |
| Alcohol Use/Dependence                                                                                                    |                                                                                   |
| Identification and assessment of new cases of alcohol use/dependence                                                      | Estimate from Abu Dhabi Government Annual Health Statistics <sup>14</sup>         |
| Drug Use/Dependence                                                                                                       |                                                                                   |
| Brief interventions and follow-up for drug use/dependence                                                                 | Estimate from Abu Dhabi Government Annual Health Statistics <sup>14</sup>         |
| Maternal Newborn and Reproductive Health                                                                                  |                                                                                   |
| Preconception Care (PCC)                                                                                                  |                                                                                   |
| Preconception Care (PCC)                                                                                                  | Assumption derived from UHC Service Coverage Sub-Index on MNCH (WHO) <sup>2</sup> |
| Antenatal Care (ANC)                                                                                                      |                                                                                   |
| Antenatal Care (ANC)                                                                                                      | Assumption: 99% ANC Coverage                                                      |
| Postnatal Care (PNC)                                                                                                      |                                                                                   |
| Postnatal Care (PNC)                                                                                                      | Assumption derived from UHC Service Coverage Sub-Index on MNCH (WHO) <sup>2</sup> |
| Premarital screening program                                                                                              |                                                                                   |
| Premarital screening program                                                                                              | Assumption: 100%                                                                  |
| General Practice                                                                                                          |                                                                                   |
| General Practice                                                                                                          | Estimate from Dubai Government Annual Health Statistics Book <sup>13</sup>        |

**Table S8. References and assumptions used to estimate the total number of services delivered in 2019 in KSA**

|                                                                                              |                                                                                   |
|----------------------------------------------------------------------------------------------|-----------------------------------------------------------------------------------|
| Immunization                                                                                 |                                                                                   |
| Measles vaccine                                                                              | MOH Statistical Yearbook 2019 <sup>15</sup>                                       |
| Pentavalent vaccine                                                                          |                                                                                   |
| Varicella vaccine                                                                            | Estimate from MOH Statistical Yearbook 2019 <sup>15</sup>                         |
| Polio vaccine                                                                                | MOH Statistical Yearbook 2019 <sup>15</sup>                                       |
| BCG vaccine                                                                                  |                                                                                   |
| Rubella vaccine                                                                              |                                                                                   |
| Pneumococcal vaccine                                                                         |                                                                                   |
| HPV vaccine                                                                                  | Assumption: 5.0%                                                                  |
| Non-Communicable Diseases                                                                    |                                                                                   |
| CVD & Diabetes                                                                               |                                                                                   |
| Screening for risk of CVD/Diabetes                                                           | Assumption: 5.0%                                                                  |
| Follow-up care for those at low risk of CVD/Diabetes (Absolute Risk: 10-20%)                 | Assumption: 5.0%                                                                  |
| Treatment for those with very high cholesterol but low absolute risk of CVD/Diabetes (< 20%) | Estimate from MOH Statistical Yearbook 2019 <sup>15</sup>                         |
| Treatment for those with high blood pressure but low absolute risk of CVD/Diabetes (< 20%)   |                                                                                   |
| Treatment for those with absolute risk of CVD/Diabetes 20-30%                                |                                                                                   |
| Treatment for those with high absolute risk of CVD/Diabetes (>30%)                           |                                                                                   |
| Treatment of new cases of acute myocardial infarction (AMI) with aspirin                     |                                                                                   |
| Treatment of cases with established ischaemic heart disease (IHD)                            |                                                                                   |
| Treatment for those with established cerebrovascular disease and post stroke                 | KSA World Health Survey <sup>16</sup>                                             |
| Treatment of cases with rheumatic heart disease (with benzathine penicillin)                 | Assumption derived from UHC Service Coverage Sub-Index on NCDs (WHO) <sup>2</sup> |
| Standard glycaemic control                                                                   | Estimate from MOH Statistical Yearbook 2019 <sup>15</sup>                         |
| Intensive glycaemic control                                                                  |                                                                                   |
| Neuropathy screening and preventive foot care                                                |                                                                                   |
| Breast Cancer                                                                                |                                                                                   |
| Basic breast cancer awareness                                                                | Assumption: 5.0%                                                                  |
| Screening: Clinical Breast Examination                                                       | Assumption derived from Bahrain                                                   |
| Screening: Mammography                                                                       | KSA World Health Survey <sup>16</sup>                                             |
| Diagnosis: Screened with clinical breast exam                                                | Estimate from WHO IARC 2020 <sup>3</sup>                                          |
| Diagnosis: Screened with mammogram                                                           |                                                                                   |
| Post-treatment surveillance for breast cancer patients                                       | Assumption derived from UHC Service Coverage Sub-Index on NCDs (WHO) <sup>2</sup> |
| Cervical Cancer                                                                              |                                                                                   |
| Papanicolaou test (Pap smear)                                                                | KSA World Health Survey <sup>16</sup>                                             |
| Post treatment surveillance for cervical cancer                                              | Assumption derived from UHC Service Coverage Sub-Index on NCDs (WHO) <sup>2</sup> |
| Colorectal Cancer                                                                            |                                                                                   |

|                                                                                 |                                                                                   |
|---------------------------------------------------------------------------------|-----------------------------------------------------------------------------------|
| Screening: faecal occult blood testing                                          | Estimate from Aljumah and Aljebreen (2017) <sup>17</sup>                          |
| Screening: Sigmoidoscopy                                                        |                                                                                   |
| Screening: Colonoscopy                                                          |                                                                                   |
| Diagnosis for colorectal cancer screened with FOBT                              | Estimation from WHO IARC 2020 <sup>3</sup>                                        |
| Diagnosis without screening for colorectal cancer (symptom based)               |                                                                                   |
| Post treatment surveillance for colorectal cancer                               | Assumption derived from UHC Service Coverage Sub-Index on NCDs (WHO) <sup>2</sup> |
| Respiratory Disease                                                             | Estimate from MOH Statistical Yearbook 2019 <sup>15</sup>                         |
| Asthma: Inhaled short acting beta agonist for intermittent asthma               |                                                                                   |
| Asthma: Low dose inhaled fluticasone + SABA                                     |                                                                                   |
| Asthma: High dose inhaled fluticasone + SABA                                    |                                                                                   |
| Asthma: Theophylline + High dose inhaled fluticasone + SABA                     |                                                                                   |
| Asthma: Oral Prednisolone + Theophylline + High dose inhaled fluticasone + SABA |                                                                                   |
| COPD: Smoking cessation                                                         |                                                                                   |
| COPD: Inhaled salbutamol                                                        |                                                                                   |
| COPD: Low-dose oral theophylline                                                |                                                                                   |
| COPD: Ipratropium inhaler                                                       |                                                                                   |
| COPD: exacerbation treatment with antibiotics                                   |                                                                                   |
| COPD: exacerbation treatment with oral prednisolone                             |                                                                                   |
| COPD: exacerbation treatment with oxygen                                        |                                                                                   |
| Emergency care                                                                  | N/A                                                                               |
| Average annual emergency care needs                                             |                                                                                   |
| Child Health                                                                    | MOH Statistical Yearbook 2019 <sup>15</sup>                                       |
| General                                                                         |                                                                                   |
| General Health (Children)                                                       |                                                                                   |
| Zinc supplementation                                                            |                                                                                   |
| Diarrhea management                                                             |                                                                                   |
| ORS                                                                             |                                                                                   |
| Zinc (diarrhea treatment)                                                       |                                                                                   |
| Antibiotics for treatment of dysentery                                          |                                                                                   |
| Treatment of severe diarrhea                                                    |                                                                                   |
| Pneumonia                                                                       |                                                                                   |
| Pneumonia treatment (children, mild cases)                                      | Assumption derived from UHC Service Coverage Index (WHO) <sup>2</sup>             |
| Treatment of severe pneumonia                                                   |                                                                                   |
| Nutrition                                                                       | Estimate from Alreshidi et al. (2018) <sup>18</sup>                               |
| Women of reproductive age and adolescent girls                                  |                                                                                   |
| Intermittent iron-folic acid supplementation                                    |                                                                                   |
| Pregnant and lactating women                                                    |                                                                                   |
| Daily iron and folic acid supplementation (pregnant women)                      |                                                                                   |
| Intermittent iron and folic acid supplementation (non-anaemic pregnant women)   | Estimate from Al-Duraibi and Am-Mutawa (2020) <sup>19</sup>                       |

|                                                                                                            |                                                                               |
|------------------------------------------------------------------------------------------------------------|-------------------------------------------------------------------------------|
| Vitamin A supplementation in pregnant women                                                                | Estimate from Azzeah and Refaat (2020) <sup>20</sup>                          |
| Iodine supplementation in pregnant women                                                                   |                                                                               |
| Adults                                                                                                     |                                                                               |
| Care for adults with low BMI                                                                               | Assumption derived from Bahrain                                               |
| Children                                                                                                   |                                                                               |
| Breastfeeding counselling and support                                                                      | Assumption derived from Service Coverage Sub-Index on MNCH (WHO) <sup>2</sup> |
| Complementary feeding counselling and support                                                              |                                                                               |
| Management of moderate acute malnutrition (children)                                                       | Assumption derived from UHC Service Coverage Index (WHO) <sup>2</sup>         |
| Mental Health                                                                                              |                                                                               |
| Anxiety disorders                                                                                          |                                                                               |
| Basic psychosocial treatment for anxiety disorders (mild cases)                                            | Assumption: 1.0%                                                              |
| Basic psychosocial treatment and anti-depressant medication for anxiety disorders (moderate-severe cases)  |                                                                               |
| Depression                                                                                                 |                                                                               |
| Basic psychosocial treatment for mild depression                                                           | Assumption: 1.0%                                                              |
| Basic psychosocial treatment and anti-depressant medication of first episode moderate-severe cases         |                                                                               |
| Psychosocial care for peri-natal depression                                                                |                                                                               |
| Psychosis                                                                                                  |                                                                               |
| Basic psychosocial support and anti-psychotic medication                                                   | Assumption: 1.0%                                                              |
| Bipolar disorder                                                                                           |                                                                               |
| Basic psychosocial treatment, advice, and follow-up for bipolar disorder, plus mood-stabilizing medication | Assumption: 1.0%                                                              |
| Epilepsy                                                                                                   |                                                                               |
| Basic psychosocial support, advice, and follow-up, plus anti-epileptic medication                          | Assumption: 1.0%                                                              |
| Developmental disorders                                                                                    |                                                                               |
| Basic psychosocial treatment, advice, and follow-up for developmental disorders                            | Assumption: 1.0%                                                              |
| Conduct disorders                                                                                          |                                                                               |
| Basic psychosocial treatment, advice, and follow-up for behavioural disorders                              | Assumption: 1.0%                                                              |
| Dementia                                                                                                   |                                                                               |
| Assessment, diagnosis, advice, and follow-up for dementia                                                  | Assumption: 1.0%                                                              |
| Alcohol use/dependence                                                                                     |                                                                               |
| Identification and assessment of new cases of alcohol use/dependence                                       | Assumption: 1.0%                                                              |
| Brief interventions and follow-up for alcohol use/dependence                                               |                                                                               |
| Drug use/dependence                                                                                        |                                                                               |
| Identification and assessment of new cases of drug use/dependence                                          | Assumption: 1.0%                                                              |
| Brief interventions and follow-up for drug use/dependence                                                  |                                                                               |
| Self-harm/suicide                                                                                          |                                                                               |
| Assess and care for person with self-harm                                                                  | Assumption: 1.0%                                                              |
| Maternal Newborn and Reproductive Health                                                                   |                                                                               |
| Family planning                                                                                            |                                                                               |



|                                                       |                                                                                   |
|-------------------------------------------------------|-----------------------------------------------------------------------------------|
| Pill - Standard daily regimen                         | KSA World Health Survey <sup>16</sup>                                             |
| IUD - Copper-T 380-A IUD (10 years)                   |                                                                                   |
| Withdrawal                                            |                                                                                   |
| Pregnancy care - ANC                                  |                                                                                   |
| Tetanus toxoid (pregnant women)                       | Estimate from KSA World Health Survey <sup>16</sup>                               |
| Basic ANC                                             |                                                                                   |
| Pregnancy care - Treatment of pregnancy complications |                                                                                   |
| Hypertensive disorder case management                 | Assumption: 100%                                                                  |
| Childbirth care - Facility births                     |                                                                                   |
| Pre-referral management of labour complications       | Assumption: 100%                                                                  |
| Postpartum care - Other                               |                                                                                   |
| Treatment of postpartum haemorrhage                   | Assumption: 100%                                                                  |
| Other sexual and reproductive health                  |                                                                                   |
| Treatment of urinary tract infection (UTI)            | Assumption derived from UHC Service Coverage Sub-Index on MNCH (WHO) <sup>2</sup> |
| Treatment of syphilis                                 |                                                                                   |
| Treatment of gonorrhoea                               |                                                                                   |
| Treatment of chlamydia                                |                                                                                   |
| Treatment of trichomoniasis                           |                                                                                   |
| Treatment of PID (Pelvic Inflammatory Disease)        |                                                                                   |
| General Practice                                      |                                                                                   |
| General Practice                                      | MOH Statistical Yearbook 2019 <sup>15</sup>                                       |
| Oral Care                                             |                                                                                   |
| Dental cleaning and preventive care                   | MOH Statistical Yearbook 2019 <sup>15</sup>                                       |

## References

1. Sultanate of Oman Ministry of Health. Annual Health Report 2019, 2020.
2. World Health Organization. The Global Health Observatory, 2023.
3. International Agency for Research on Cancer. Global Cancer Observatory. Cancer Today.
4. Ministry of Health of Bahrain. Health Statistics 2019, 2021.
5. United Nations DoEaSA, Population Division,. Contraceptive Use by Method 2019: Data Booklet (ST/ESA/SER.A/435), 2019.
6. Ministry of Health of Kuwait. Annual Health Report 2019. Fifty Sixth Edition (LVI), 20220.
7. Avenir Health. OneHealth Tool. Intervention Assumptions, January 2016.
8. Qatar Planning and Statistics Authority. Health Services Statistics - Chapter 6 2019 [Available from: <https://www.psa.gov.qa/en/statistics1/pages/topicslisting.aspx?parent=Social&child=Health> accessed 24/01/2022 2022.
9. The World Bank. World Bank Open Data, 2022.
10. Zainel A, Osman SRO, Al-Kohji SMS, et al. Iron deficiency, its epidemiological features and feeding practices among infants aged 12 months in Qatar: a cross-sectional study. *BMJ Open* 2018;8(5):e020271. doi: 10.1136/bmjopen-2017-020271 [published Online First: 20180509]
11. World Health Organization and United Nations Children's Fund. WHO/UNICEF estimates of national immunization coverage 2022 [Available from: <https://www.who.int/teams/immunization-vaccines-and-biologicals/immunization-analysis-and-insights/global-monitoring/immunization-coverage/who-unicef-estimates-of-national-immunization-coverage> accessed 06/03/2022.
12. ICO/IARC HPV Information Centre. United Arab Emirates. Human Papillomavirus and Related Cancers, Fact Sheet 2019. 2019
13. Government of Dubai. Open Data Dashboards. Departement of Health 2022 [Available from: <https://www.dha.gov.ae/en/open-data> accessed 04/03/2022.
14. Government of Abu Dhabi. Open Data Dashboards. Departement of Health 2022 [Available from: <https://www.doh.gov.ae/en/resources/opendata> accessed 04/03/2022.
15. Ministry of Health of the Kingdom of Saudi Arabia. Statistical Yearbook 2019. Chapter IV. Health Activities 2021 [Available from: <https://www.moh.gov.sa/en/Ministry/Statistics/book/Pages/default.aspx>.
16. Ministry of Health of the Kingdom of Saudi Arabia. World Health Survey Saudi Arabia 2019. Final Report., 2019.
17. Aljumah AA, Aljebreen AM. Policy of screening for colorectal cancer in Saudi Arabia: A prospective analysis. *Saudi J Gastroenterol* 2017;23(3):161-68. doi: 10.4103/sjg.SJG\_468\_16
18. Alreshidi MA, Haridi HK. Prevalence of anemia and associated risk factors among pregnant women in an urban community at the North of Saudi Arabia. *J Prev Med Hyg* 2021;62(3):E653-e63. doi: 10.15167/2421-4248/jpmh2021.62.3.1880 [published Online First: 20210915]
19. AlDuraibi S, Al-Mutawa J. Knowledge and awareness of folic acid usage in Saudi pregnant women in Riyadh city from 2019-2020. *J Family Med Prim Care* 2020;9(10):5158-64. doi: 10.4103/jfmpc.jfmpc\_638\_20 [published Online First: 20201030]
20. Azzeh F, Refaat B. Iodine adequacy in reproductive age and pregnant women living in the Western region of Saudi Arabia. *BMC Pregnancy Childbirth* 2020;20(1):370. doi: 10.1186/s12884-020-03057-w [published Online First: 20200622]
